# Supplementary material for: Regiodivergent cascade cyclization/alkoxylation of allenamides via N-protecting group driven rearrangement to access indole and indoline derivatives
Source: Royal Society of Chemistry journal article supplement (doi:10.1039/d2cc03174d), 2022-01-01
Supplement: d2cc03174d1.pdf [file d2cc03174d1.pdf]

# Supporting Information

## Regiodivergent cascade cyclization/alkoxylation of allenamides via N-protecting group driven rearrangement to access indole and indoline derivatives

Dhananjay Chaudhary, Suman Yadav, Naveen Kumar Maurya, Dharmendra Kumar, Km Ishu  
and Malleswara Rao Kuram\*

Medicinal and Process Chemistry Division, CSIR-Central Drug Research Institute,  
Lucknow- 226031, U.P., India  
Academy of Scientific & Innovative Research (AcSIR),  
Ghaziabad 201002, India  
Email: malleswara.kuram@cdri.res.in

### TABLE OF CONTENTS

|   |                                            |     |
|---|--------------------------------------------|-----|
| 1 | General Information                        | S2  |
| 2 | Experimental procedures                    | S3  |
| 3 | Characterization data of starting material | S7  |
| 4 | Characterization data of isolated products | S10 |
| 5 | Gram scale synthesis                       | S24 |
| 6 | Mechanistic experiments                    | S25 |
| 7 | Crystal Structure                          | S28 |
| 8 | References                                 | S29 |
| 9 | NMR Spectra                                | S30 |

## General Information

Unless otherwise noted, all the reactions were performed using oven-dried Schlenk tubes under nitrogen. The reactions were monitored by Merck silica gel 60 F<sub>254</sub> precoated plates (0.25 mm) visualizing under UV light (254 nm) or I<sub>2</sub> staining. The temperature mentioned for any reaction is corresponding to the oil bath temperature. Column chromatography was performed using silica gel 60-120 Å or 100-200 Å mesh of Merck Company.

All the commercial reagents and anhydrous solvents were purchased from Sigma-Aldrich, Alfa Aesar, Merck, Spectrochem, Avra Synthesis Pvt. Ltd. and directly used as received without any further purification.

## Analytical Methods

<sup>1</sup>H, <sup>13</sup>C and <sup>19</sup>F nuclear magnetic resonance spectra were recorded on Bruker Advance III 400 MHz spectrometer at 25 °C. NMRs of the products were measured in CDCl<sub>3</sub>. The chemical shifts in <sup>1</sup>H NMR and <sup>13</sup>C{<sup>1</sup>H} NMR spectra are reported in parts per million (ppm) and are referenced to the residual solvent signal as the internal standard; <sup>1</sup>H NMR spectra (CDCl<sub>3</sub> δ 7.26 ppm), <sup>13</sup>C (CDCl<sub>3</sub> δ 77.16), <sup>1</sup>H (D<sub>4</sub>-methanol δ 3.31 ppm), <sup>13</sup>C (D<sub>4</sub>-methanol δ 49.00) and <sup>1</sup>H (D<sub>6</sub>-acetone δ 2.05 ppm), <sup>13</sup>C (D<sub>4</sub>-methanol δ 29.84, 206.26). The coupling constant (J) was reported in Hertz (Hz). Splitting patterns are denoted as "s" for singlet; "d" for doublet; "t" for triplet; "q" for quartet; "sext" for sextet; "sept" for septet; "m" for multiplet, "br" for broad; "dt" for doublet of triplets; "td" for triplet of doublets. ESI-HRMS were recorded on AGILENT 6520 Q-TOF spectrometer. IR spectra were recorded with Agilent Cary 630 FTIR Spectrometer.

## 2. Experimental procedures

The starting materials **1a-1x**<sup>1,2,3,4,5,6,7</sup> and **1'a**<sup>5</sup>, **7a-7b**<sup>8</sup> were prepared according to the previously reported methods.

### 2.1 Preparation of Allenamides:

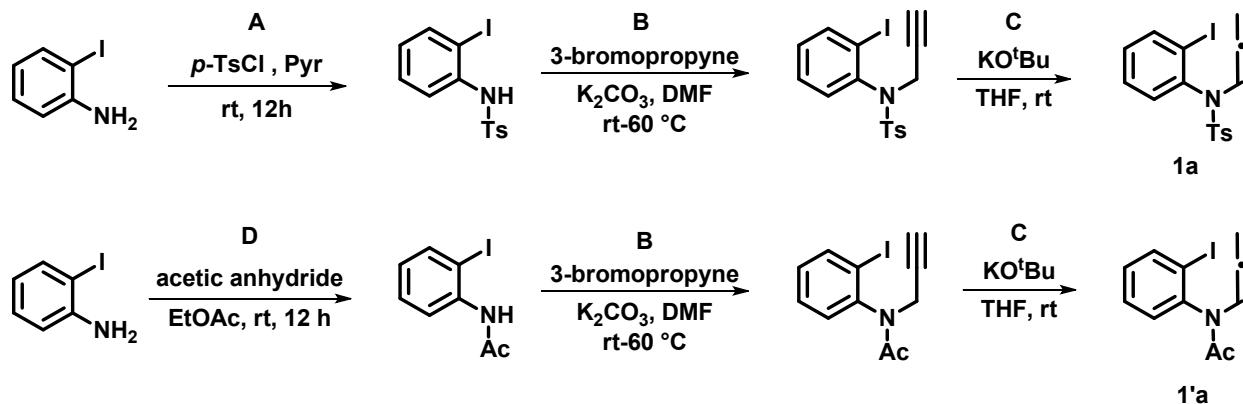

#### General procedure A for tosylation:

To a solution of *o*-iodoaniline (1.0 equiv.) in pyridine was added *p*-TsCl (1.05 equiv.) at 0 °C. The reaction was stirred at rt over night before being quenched with H<sub>2</sub>O. The quenched mixture was extracted three times with DCM. The combined organic layers were first washed with 1M HCl to remove excess pyridine, and then with saturated aq. NaHCO<sub>3</sub>, H<sub>2</sub>O, followed by saturated aq. NaCl, and dried over anhyd. Na<sub>2</sub>SO<sub>4</sub>. The filtrate was concentrated under reduced pressure and purified using silica gel flash column chromatography to give the desired product tosylamine.

#### General procedure B for propargylamides:

To a solution of the crude carbamate/tosylamine product (1.00 equiv.) in DMF, K<sub>2</sub>CO<sub>3</sub> (1.5 equiv.) and 3-bromopropyne (1.5 equiv.) was added. The mixture was stirred in an oil bath at 60 °C for overnight. After the reaction was complete, the mixture was filtered through Celite. The filtrate was concentrated under reduced pressure and purified by flash column chromatography to give the propargylamide.

#### General procedure C for allenation reaction:

To a solution of propargylamide (1.0 equiv) in THF was added *t*-BuOK (0.5 equiv.) at 0 °C. The reaction was stirred at room temperature for 1 h before being concentrated under reduced pressure. Subsequently, the residue was suspended in DCM and then filtered through Celite. The filtrate was concentrated under reduced pressure and the crude residue was purified by flash column chromatography to give the allenamide.

#### General procedure D for acetylation:<sup>11, 12</sup>

In a 25 mL round bottom flask, *o*-iodoaniline (1.0 equiv) was dissolved in EtOAc, and acetic anhydride (1.4 equiv.) was added, and the reaction mixture was stirred at room temperature overnight. The solution was filtered and concentrate under reduced pressure to give the crude carbamate that was used in the next step without further purification.

### General procedure D' for Benzoylation:<sup>13</sup>

To a solution of corresponding 2-iodo aniline (1.0 equiv.) in dichloromethane was added benzoyl chloride (1.2 mmol) followed by triethylamine (1.5 equiv.) at room temperature. After complete addition, the reaction was allowed to stir continuously until all the starting material was consumed completely (monitored by TLC, approx. 8-10 h after completion), the reaction mixture was quenched with water and extracted with dichloromethane. The combined organic layer was washed with brine solution, dried over Na<sub>2</sub>SO<sub>4</sub>, evaporated and washed with hexane to give pure benzamide product in quantitative yields.

Table S1. Substrates employed in the reaction:

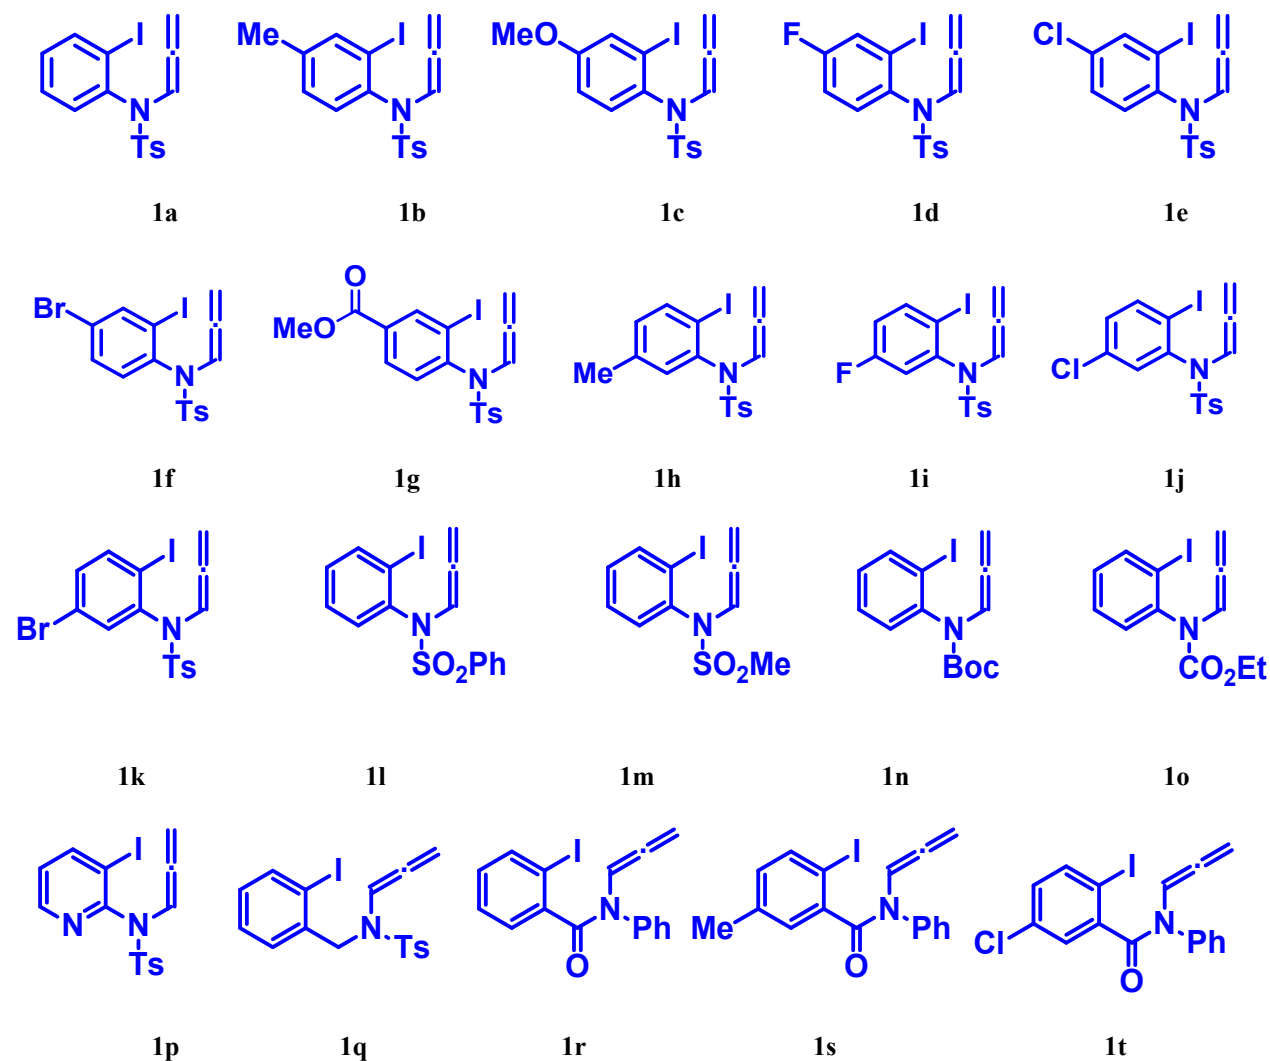

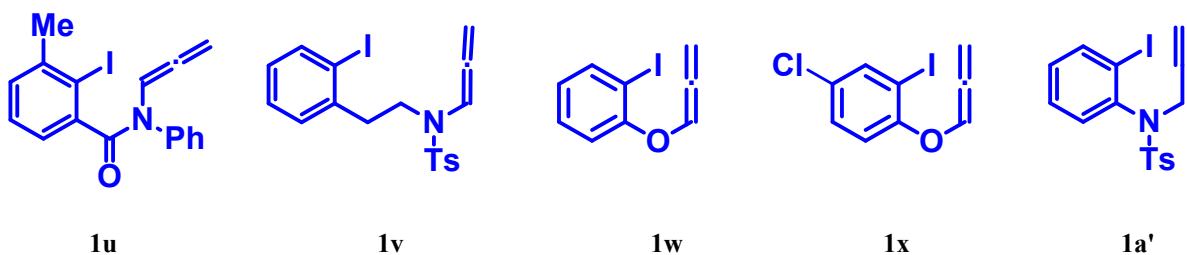

**Table S2. Substrates employed in the reaction:**

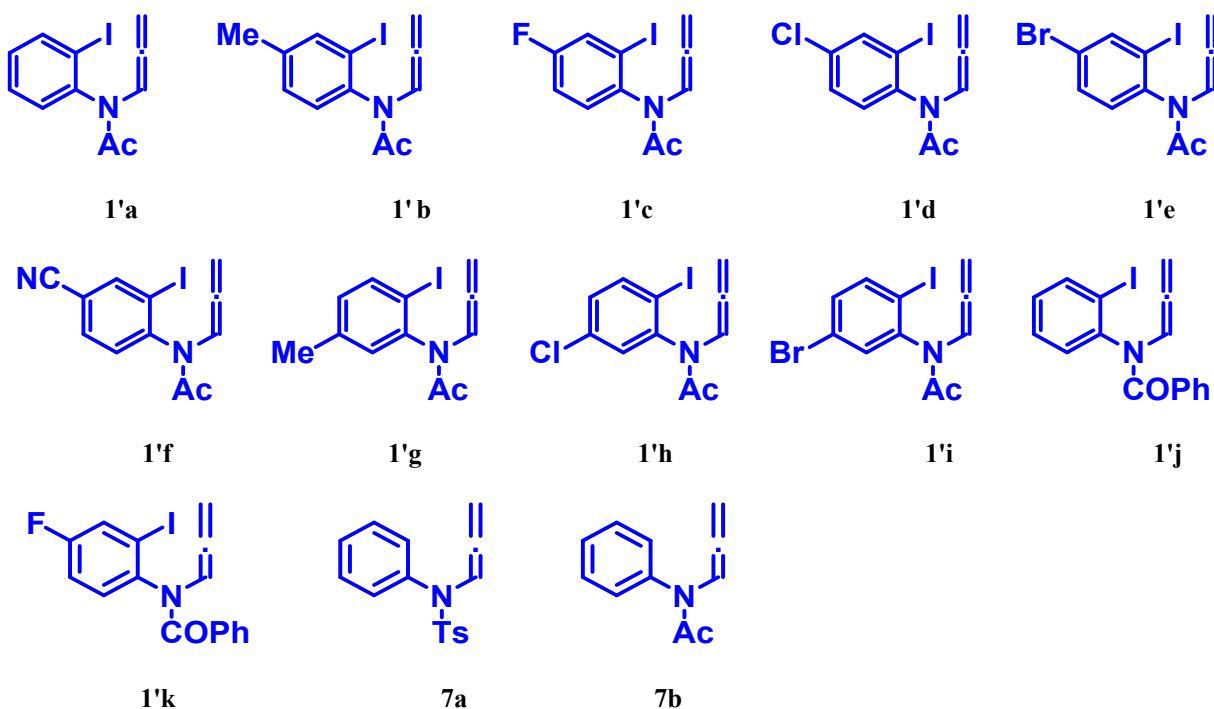

## 2.2 General Procedure E for the synthesis of 3a-4i:

To an oven dried Schlenk tube was charged with allenamide (1 equiv.), palladium chloride (10 mol%), tri(2-furyl)phosphine (20 mol%), and  $K_2CO_3$  (2 equiv.), and the vial was sealed with a septum and put under vacuum, followed by flushing with  $N_2$  gas (3X). Then, the solvent methanol/ethanol (**2a**) 3mL was added to the reaction mixture. The reaction was stirred at rt for (18-20 h), and the solvent was evaporated under reduced pressure. The residue was purified by column chromatography on silica gel (PE/EtOAc) to yield the corresponding product.

## 2.3 General Procedure F for the Synthesis of 4ad:

To an oven dried Schlenk tube was charged with allenamide **1a** (1 equiv.), and piperidine (1.2 equiv.), palladium chloride (10 mol%), tri(2-furyl)phosphine(20 mol%), and  $Cs_2CO_3$  (2 equiv.), and the vial was sealed with a septum and put under vacuum, followed by flushing with  $N_2$  gas (3X). DCE (3mL) was added to the reaction mixture. The reaction was stirred at 80 °C for (18-20 h), the solvent was evaporated under reduced pressure. The residue was purified by column chromatography on silica gel (acetone in hexane) to afford the desired product **4ad**.

## 2.4 Optimization of the reaction conditions:<sup>a,b</sup>

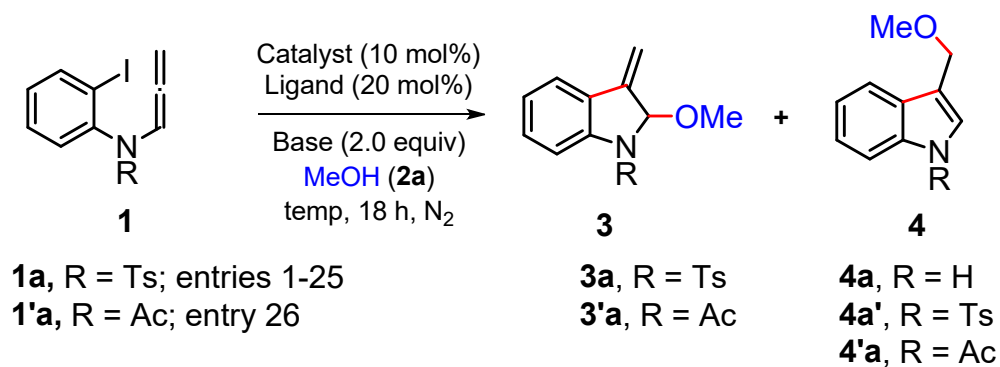

| Entry     | Catalyst                                           | Ligand                      | Base                               | Temp °C     | 3a (%)      | 4a (%)       |
|-----------|----------------------------------------------------|-----------------------------|------------------------------------|-------------|-------------|--------------|
| 1         | Pd(OAc) <sub>2</sub>                               | XPhos                       | Cs <sub>2</sub> CO <sub>3</sub>    | 80          | 17          | 20           |
| 2         | "                                                  | DPPP                        | "                                  | "           | n.d.        | 37           |
| 3         | "                                                  | PPh <sub>3</sub>            | "                                  | "           | <b>(50)</b> | <b>(46)</b>  |
| 4         | "                                                  | 1,10 Phen                   | "                                  | "           | trace       | nd           |
| 5         | "                                                  | 2,2 bipyridyl               | "                                  | "           | nd          | nd           |
| 6         | "                                                  | Tri(2-furyl)phosphine (TFP) | "                                  | "           | 62          | 9            |
| 7         | Pd(acac) <sub>2</sub>                              | "                           | "                                  | "           | 67          | 15           |
| 8         | Pd(PPh <sub>3</sub> ) <sub>2</sub> Cl <sub>2</sub> | "                           | "                                  | "           | 44          | n.d.         |
| 9         | Pd(Ph <sub>3</sub> ) <sub>4</sub>                  | "                           | "                                  | "           | n.d.        | n.d.         |
| 10        | Pd <sub>2</sub> (dba) <sub>3</sub>                 | "                           | "                                  | "           | n.d.        | n.d.         |
| <b>11</b> | <b>PdCl<sub>2</sub></b>                            | "                           | "                                  | "           | <b>78</b>   | <b>11</b>    |
| 12        | "                                                  | PPh <sub>3</sub>            | Cs <sub>2</sub> CO <sub>3</sub>    | "           | 11          | 56           |
| 13        | "                                                  | PCy <sub>3</sub>            | Cs <sub>2</sub> CO <sub>3</sub>    | "           | n.d.        | n.d.         |
| 14        | "                                                  | P(OPh) <sub>3</sub>         | Cs <sub>2</sub> CO <sub>3</sub>    | "           | 21          | 13           |
| 15        | "                                                  | JohnPhos                    | Cs <sub>2</sub> CO <sub>3</sub>    | "           | n.d.        | n.d.         |
| 16        | "                                                  | P(o-tol) <sub>3</sub>       | Cs <sub>2</sub> CO <sub>3</sub>    | "           | n.d.        | n.d.         |
| 17        | PdCl <sub>2</sub>                                  | TFP                         | K <sub>2</sub> CO <sub>3</sub>     | "           | (78)        | n.d.         |
| 18        | "                                                  | "                           | K <sub>3</sub> PO <sub>4</sub>     | "           | 73          | 8            |
| 19        | "                                                  | "                           | Na <sub>2</sub> CO <sub>3</sub>    | "           | 70          | n.d.         |
| 20        | "                                                  | "                           | NaO <sup>t</sup> Bu                | "           | 61          | 40           |
| <b>21</b> | <b>PdCl<sub>2</sub></b>                            | <b>TFP</b>                  | <b>K<sub>2</sub>CO<sub>3</sub></b> | <b>r.t.</b> | <b>(88)</b> | <b>trace</b> |
| 22        | PdCl <sub>2</sub> (5 mol%)                         | TFP (10 mol%)               | K <sub>2</sub> CO <sub>3</sub>     | r.t.        | (78)        | trace        |

|                       |                             |               |                                    |             |            |             |
|-----------------------|-----------------------------|---------------|------------------------------------|-------------|------------|-------------|
| 23                    | PdCl <sub>2</sub> (2 mol%)  | TFP (4 mol%)  | K <sub>2</sub> CO <sub>3</sub>     | r.t.        | (70)       | ~5          |
| 24                    | PdCl <sub>2</sub> (10 mol%) | TFP (10 mol%) | K <sub>2</sub> CO <sub>3</sub>     | r.t.        | (65)       | ~5          |
| 25                    | PdCl <sub>2</sub>           | TFP           | Ag <sub>2</sub> CO <sub>3</sub>    | r.t.        | 5          | trace       |
| 26                    | None                        | TFP           | K <sub>2</sub> CO <sub>3</sub>     | r.t.        | n.d.       | n.d.        |
| 27                    | PdCl <sub>2</sub>           | None          | K <sub>2</sub> CO <sub>3</sub>     | r.t.        | 10         | n.d.        |
| 28                    | PdCl <sub>2</sub>           | TFP           | None                               | r.t.        | n.d.       | n.d.        |
| <b>29<sup>c</sup></b> | <b>PdCl<sub>2</sub></b>     | <b>TFP</b>    | <b>K<sub>2</sub>CO<sub>3</sub></b> | <b>r.t.</b> | <b>(7)</b> | <b>(79)</b> |

<sup>a</sup>Reaction conditions: **1a/1'a** (1.0 equiv.), catalyst (10 mol%), ligand (20 mol%), base (2.0 equiv.), MeOH (1 mL) at 80 °C/rt for 18 h under N<sub>2</sub>. <sup>1</sup>HNMR yield using 1,3,5-trimethoxybenzene as internal standard. n.d. = not detected.

<sup>b</sup>Isolated yields on parantheses. <sup>c</sup>R = Ac in **1**.

### 3. Characterization Data of Starting Materials:

#### N-(2-iodo-4-methylphenyl)-N-(propa-1,2-dien-1-yl)acetamide (**1'b**):

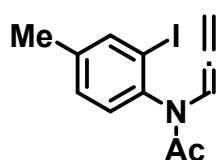

The representative general procedure **C** was followed, using propargylamide (470 mg, 1.5 mmol), in THF was added *t*-BuOK (0.5 equiv.) at 0 °C. The reaction was stirred at room temperature for 1 h. Purification by column chromatography (eluted with 6% EtOAc in hexane) furnished **1'b** (320 mg, 68% yield) as a pale yellow solid. R<sub>f</sub> 0.72 (20% EtOAc in hexane).

<sup>1</sup>H NMR (400 MHz, CDCl<sub>3</sub>): δ 7.73 (s, 1H), 7.59 (td, *J* = 6.3, 1.2 Hz, 1H), 7.20 (d, *J* = 7.9 Hz, 1H), 7.11 (d, *J* = 7.9 Hz, 1H), 5.05-4.94 (m, 2H), 2.34 (s, 3H), 1.84 (s, 3H).

<sup>13</sup>C NMR (100 MHz, CDCl<sub>3</sub>): δ 202.4, 168.2, 140.6, 140.4, 140.0, 130.4, 129.2, 99.8, 99.6, 86.6, 23.0, 20.6.

HRMS (ESI) Calcd. for C<sub>12</sub>H<sub>12</sub>INO: [M+H]<sup>+</sup>, 314.0042. Found: *m/z* 314.0033.

#### N-(4-fluoro-2-iodophenyl)-N-(propa-1,2-dien-1-yl)acetamide (**1'c**):

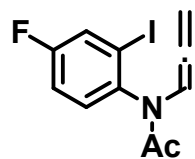

The representative general procedure **C** was followed, using propargylamide (350 mg, 1.1 mmol), in THF was added *t*-BuOK (0.5 equiv) at 0 °C. The reaction was stirred at room temperature for 1 h. Purification by column chromatography (eluted with 6% EtOAc in hexane) furnished **1'c** (195 mg, 56% yield) as a pale yellow solid. R<sub>f</sub> 0.71 (20% EtOAc in hexane).

<sup>1</sup>H NMR (500 MHz, CDCl<sub>3</sub>): δ 7.63 (dd, *J* = 7.6, 2.8 Hz, 1H), 7.59 (t, *J* = 6.4, Hz, 1H), 7.23 (dd, *J* = 8.7, 5.3 Hz, 1H), 7.16-7.12 (m, 1H), 5.07-4.97 (m, 2H), 1.86 (s, 3H).

<sup>13</sup>C NMR (125 MHz, CDCl<sub>3</sub>): δ 202.3, 167.9, 161.4 (d, *J* = 254.3 Hz), 139.0, 130.5 (d, *J* = 8.9 Hz), 127.0 (d, *J* = 24.6 Hz), 116.7 (d, *J* = 22.5 Hz), 99.9 (d, *J* = 8.8 Hz), 99.8, 86.9, 22.9.

$^{19}\text{F}$  NMR (376 MHz):  $\delta$  -110.5.

HRMS (ESI) Calcd. for  $\text{C}_{11}\text{H}_9\text{FINO}$ :  $[\text{M}+\text{H}]^+$ , 317.9791. Found:  $m/z$  317.9785.

**N-(4-chloro-2-iodophenyl)-N-(propa-1,2-dien-1-yl)acetamide (1'd):**

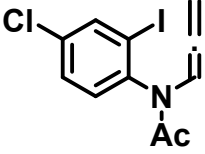 The representative general procedure **C** was followed, using propargylamide (500 mg, 1.5 mmol), in THF was added *t*-BuOK (0.5 equiv) at 0 °C. The reaction was stirred at room temperature for 1 h. Purification by column chromatography (eluted with 7% EtOAc in hexane) furnished **1'd** (300 mg, 60% yield) as a pale yellow solid.  $R_f$  0.71 (20% EtOAc in hexane).

$^1\text{H}$  NMR (400 MHz,  $\text{CDCl}_3$ ):  $\delta$  7.91 (d,  $J = 2.3$  Hz, 1H), 7.59 (t,  $J = 6.4$  Hz, 1H), 7.41 (dd,  $J = 8.4, 2.3$  Hz, 1H), 7.18 (d,  $J = 8.4$  Hz, 1H), 5.09-4.98 (m, 2H), 1.87 (s, 3H).

$^{13}\text{C}$  NMR (125 MHz,  $\text{CDCl}_3$ ):  $\delta$  202.1, 167.6, 141.4, 139.5, 135.1, 130.4, 129.9, 100.4, 99.6, 87.1, 23.0.

HRMS (ESI) Calcd. for  $\text{C}_{11}\text{H}_9\text{ClINO}$ :  $[\text{M}+\text{H}]^+$ , 333.9496. Found:  $m/z$  333.9488.

**N-(4-bromo-2-iodophenyl)-N-(propa-1,2-dien-1-yl)acetamide (1'e):**

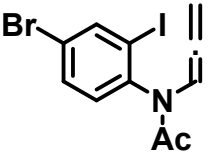 The representative general procedure **C** was followed, using propargylamide (565 mg, 1.5 mmol), in THF was added *t*-BuOK (0.5 equiv) at 0 °C. The reaction was stirred at room temperature for 1 h. Purification by column chromatography (eluted with 8% EtOAc in hexane) furnished **1'e** (342 mg, 60% yield) as a pale yellow solid.  $R_f$  0.72 (20% EtOAc in hexane).

$^1\text{H}$  NMR (500 MHz,  $\text{CDCl}_3$ ):  $\delta$  8.07 (d,  $J = 1.8$  Hz, 1H), 7.59-7.54 (m, 2H), 7.12 (d,  $J = 8.3$  Hz, 1H), 5.08-4.99 (m, 2H), 1.86 (s, 3H).

$^{13}\text{C}$  NMR (125 MHz,  $\text{CDCl}_3$ ):  $\delta$  202.1, 167.6, 142.2, 141.9, 132.9, 130.8, 123.1, 100.8, 99.6, 87.1, 23.0.

HRMS (ESI) Calcd. for  $\text{C}_{11}\text{H}_9\text{BrINO}$ :  $[\text{M}+\text{H}]^+$ , 377.8990. Found:  $m/z$  377.8980.

**N-(4-cyano-2-iodophenyl)-N-(propa-1,2-dien-1-yl)acetamide (1'f):**

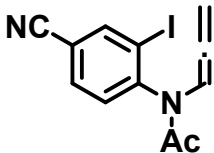 The representative general procedure **C** was followed, using propargylamide (324 mg, 1.1 mmol), in THF was added *t*-BuOK (0.5 equiv) at 0 °C. The reaction was stirred at room temperature for 1 h. Purification by column chromatography (eluted with 8% EtOAc in hexane) furnished **1'f** (220 mg, 62% yield) as a pale yellow solid.  $R_f$  0.65 (20% EtOAc in hexane).

$^1\text{H}$  NMR (400 MHz,  $\text{CDCl}_3$ ):  $\delta$  8.21 (d,  $J = 1.2$  Hz, 1H), 7.73 (dd,  $J = 8.0, 1.3$  Hz, 1H), 7.59 (t,  $J = 6.3$  Hz, 1H), 7.37 (d,  $J = 8.0$  Hz, 1H), 5.08-4.98 (m, 2H), 1.86 (s, 3H).



$^{13}\text{C}$  NMR (100 MHz,  $\text{CDCl}_3$ ):  $\delta$  201.9, 166.8, 146.9, 143.4, 133.2, 130.6, 116.1, 114.3, 100.6, 99.4, 87.5, 23.1.

HRMS (ESI) Calcd. for  $\text{C}_{12}\text{H}_9\text{IN}_2\text{O}$ :  $[\text{M}+\text{H}]^+$ , 324.9838. Found:  $m/z$  324.9828.

#### N-(2-iodo-5-methylphenyl)-N-(propa-1,2-dien-1-yl)acetamide (**1'g**):

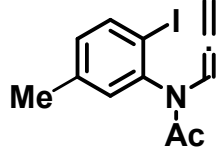 The representative general procedure **C** was followed, using propargylamide (532 mg, 1.7 mmol), in THF was added *t*-BuOK (0.5 equiv) at 0 °C. The reaction was stirred at room temperature for 1 h. Purification by column chromatography (eluted with 7% EtOAc in hexane) furnished **1'g** (350 mg, 66% yield) as a pale yellow solid.  $R_f$  0.72 (20% EtOAc in hexane).

$^1\text{H}$  NMR (500 MHz,  $\text{CDCl}_3$ ):  $\delta$  7.76 (d,  $J = 8.1$  Hz, 1H), 7.59 (t,  $J = 6.4$  Hz, 1H), 7.06 (s, 1H), 6.90 (d,  $J = 8.1$  Hz, 1H), 5.05-4.95 (m, 2H), 2.34 (s, 3H), 1.86 (s, 3H).

$^{13}\text{C}$  NMR (125 MHz,  $\text{CDCl}_3$ ):  $\delta$  202.4, 168.0, 142.4, 140.0, 139.6, 131.2, 130.4, 99.7, 95.6, 86.6, 23.0, 20.9.

HRMS (ESI) Calcd. For  $\text{C}_{12}\text{H}_{12}\text{INO}$ :  $[\text{M}+\text{H}]^+$ , 314.0042. Found:  $m/z$  314.0011.

#### N-(5-chloro-2-iodophenyl)-N-(propa-1,2-dien-1-yl)acetamide (**1'h**):

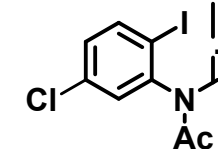 The representative general procedure **C** was followed, using propargylamide (433 mg, 1.3 mmol), in THF was added *t*-BuOK (0.5 equiv) at 0 °C. The reaction was stirred at room temperature for 1 h. Purification by column chromatography (eluted with 7% EtOAc in hexane) furnished **1'h** (250 mg, 58% yield) as a pale yellow solid.  $R_f$  0.71 (20% EtOAc in hexane).

$^1\text{H}$  NMR (400 MHz,  $\text{CDCl}_3$ ):  $\delta$  7.82 (d,  $J = 8.5$  Hz, 1H), 7.57 (t,  $J = 6.3$  Hz, 1H), 7.25 (s, 1H), 7.09 (dd,  $J = 8.4, 2.1$  Hz, 1H), 5.08-5.00 (m, 2H), 1.87 (s, 3H).

$^{13}\text{C}$  NMR (125 MHz,  $\text{CDCl}_3$ ):  $\delta$  202.1, 167.5, 143.8, 140.8, 135.3, 130.5, 130.0, 99.5, 97.5, 87.2, 23.1.

HRMS (ESI) Calcd. for  $\text{C}_{11}\text{H}_9\text{ClINO}$ :  $[\text{M}+\text{H}]^+$ , 333.9496. Found:  $m/z$  333.9487.

#### N-(5-bromo-2-iodophenyl)-N-(propa-1,2-dien-1-yl)acetamide (**1'i**):

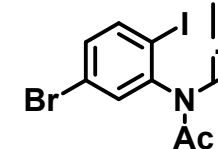 The representative general procedure **C** was followed, using propargylamide (565 mg, 1.5 mmol), in THF was added *t*-BuOK (0.5 equiv) at 0 °C. The reaction was stirred at room temperature for 1 h. Purification by column chromatography (eluted with 7% EtOAc in hexane) furnished **1'i** (350 mg, 62% yield) as a pale yellow solid.  $R_f$  0.71 (20% EtOAc in hexane).

**<sup>1</sup>H NMR (500 MHz, CDCl<sub>3</sub>):**  $\delta$  7.76 (d,  $J$  = 8.4 Hz, 1H), 7.58 (t,  $J$  = 6.4 Hz, 1H), 7.41 (d,  $J$  = 2.2 Hz, 1H), 7.23 (dd,  $J$  = 8.4, 2.2 Hz, 1H), 5.08-5.01 (m, 2H), 1.88 (s, 3H).

**<sup>13</sup>C NMR (125 MHz, CDCl<sub>3</sub>):**  $\delta$  202.1, 167.5, 143.9, 141.1, 133.4, 132.9, 122.8, 99.6, 98.4, 87.2, 23.1.

**HRMS (ESI) Calcd.** for C<sub>11</sub>H<sub>9</sub>BrINO: [M+H]<sup>+</sup>, 377.8990. Found: m/z 377.8988.

#### ethyl (2-iodophenyl(propa-1,2-dien-1-yl)carbamate (**1o**):

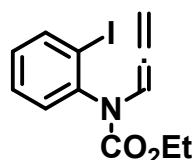

2-Iodoaniline (1.0 equiv), ethyl chloroformate (4.0 equiv.) and K<sub>2</sub>CO<sub>3</sub> (6.0 equiv) were stirred in 40 mL of acetone at room temperature for 3 h. The reaction was monitored by TLC to establish completion. Then the reaction mixture was diluted with water. The organic phase was separated, and the aqueous phase was extracted with ether. Organic fractions were combined, washed with brine, dried over anhydrous MgSO<sub>4</sub>, and concentrated under reduced pressure. Column chromatography on silica gel using 8:1 hexanes/ethyl acetate to give the ethyl (2-iodophenyl)carbamate as off-white solid.

To a solution of the ethyl (2-iodophenyl)carbamate (1.0 equiv.) in DMF, potassium carbonate (1.5 equiv.) and 3-bromopropyne (1.5 equiv.) was added. The mixture stirred in an oil bath at 60 °C for overnight. After the reaction was complete, the mixture was filtered through Celite. The filtrate was concentrated under reduced pressure and purified by flash column chromatography to give the ethyl (2-iodophenyl)(prop-2-yn-1-yl)carbamate.

To a solution ethyl (2-iodophenyl)(prop-2-yn-1-yl)carbamate (324 mg, 1.1 mmol), in THF was added *t*-BuOK (0.5 equiv.) at 0 °C. The reaction was stirred at room temperature for 1 h. Purification by column chromatography (eluted with 8% EtOAc in hexane) furnished **1o** (220 mg, 62% yield) as a sticky yellow solid. R<sub>f</sub> 0.65 (20% EtOAc in hexane).

**<sup>1</sup>H NMR (400 MHz, CDCl<sub>3</sub>):**  $\delta$  7.86 (d,  $J$  = 7.9 Hz, 1H), 7.38 -7.19 (m, 3H), 7.02 (t,  $J$  = 7.6 Hz, 1H), 5.06-4.97 (m, 2H), 4.26-4.10 (m, 2H), 1.18 (t,  $J$  = 6.3 Hz, 3H).

**<sup>13</sup>C NMR (125 MHz, CDCl<sub>3</sub>):**  $\delta$  201.6, 152.6, 141.4, 139.5, 129.6, 129.5, 128.9, 101.4, 99.6, 87.2, 62.6, 14.6.

**HRMS (ESI) Calcd.** for C<sub>12</sub>H<sub>12</sub>INO<sub>2</sub>: [M+Na]<sup>+</sup>, 351.9810. Found: m/z 351.9808.

## 4. Characterization Data of Isolated Products

#### 2-methoxy-3-methylene-1-tosylindoline (**3a**):

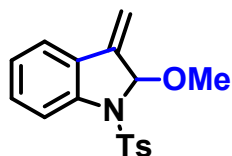

The representative general procedure E was followed, using **1a** (82 mg, 0.2 mmol) for 18 h. Purification by column chromatography (eluted with 8% EtOAc in hexane) furnished **3a** (55 mg, 88% yield) as a brown solid. R<sub>f</sub> 0.71 (20% EtOAc in hexane).

**<sup>1</sup>H NMR (400 MHz, CDCl<sub>3</sub>):**  $\delta$  7.65 (d,  $J$  = 8.3 Hz, 2H), 7.61 (d,  $J$  = 8.1 Hz, 1H), 7.35 (d,  $J$  = 7.6 Hz, 1H), 7.29-7.24 (m, 1H), 7.19 (d,  $J$  = 8.1 Hz, 2H), 7.04 (td,  $J$  = 7.5, 0.9 Hz, 1H), 5.89 (t,  $J$  = 1.6 Hz, 1H), 5.68 (d,  $J$  = 1.7 Hz, 1H), 5.35 (d,  $J$  = 1.3 Hz, 1H), 3.31 (s, 3H), 2.35 (s, 3H).

**<sup>13</sup>C NMR (100 MHz, CDCl<sub>3</sub>):**  $\delta$  144.2, 142.7, 141.2, 135.4, 130.2, 129.6, 128.1, 127.2, 124.2, 120.9, 115.8, 109.3, 92.9, 52.2, 21.5.

**Melting point:** 125-127 °C.

**HRMS (ESI) Calcd.** for C<sub>17</sub>H<sub>17</sub>NO<sub>3</sub>S: [M-OCH<sub>3</sub>]<sup>+</sup>, 284.0740. Found:  $m/z$  284.0751.

### 2-methoxy-5-methyl-3-methylene-1-tosylindoline (3b):

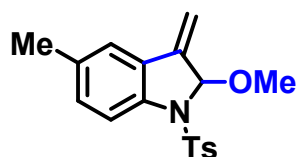

The representative general procedure **E** was followed, using **1b** (85 mg, 0.2 mmol) for 18 h. Purification by column chromatography (eluted with 8% EtOAc in hexane) furnished **3b** (56 mg, 85% yield) as a white solid.  $R_f$  0.71 (20 % EtOAc in hexane).

**<sup>1</sup>H NMR (500 MHz, CDCl<sub>3</sub>):**  $\delta$  7.63 (d,  $J$  = 8.3 Hz, 2H), 7.52 (d,  $J$  = 8.3 Hz, 1H), 7.18 (d,  $J$  = 8.1 Hz, 2H), 7.14 (s, 1H), 7.08 (d,  $J$  = 8.3 Hz, 1H), 5.85 (t,  $J$  = 1.5 Hz, 1H), 5.63 (d,  $J$  = 1.7 Hz, 1H), 5.30 (d,  $J$  = 1.3 Hz, 1H), 3.32 (s, 3H), 2.34 (s, 3H), 2.29 (s, 3H).

**<sup>13</sup>C NMR (125 MHz, CDCl<sub>3</sub>):**  $\delta$  144.1, 141.4, 140.5, 135.3, 134.1, 131.0, 129.6, 128.2, 127.2, 121.3, 115.8, 108.9, 93.1, 52.3, 21.5, 20.9.

**Melting point:** 103-105 °C.

**HRMS (ESI) Calcd.** for C<sub>18</sub>H<sub>19</sub>NO<sub>3</sub>S: [M-OCH<sub>3</sub>]<sup>+</sup>, 298.0896. Found:  $m/z$  298.0898.

### 2,5-dimethoxy-3-methylene-1-tosylindoline (3c):

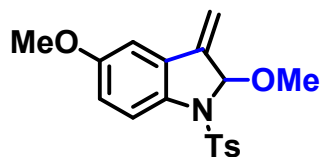

The representative general procedure **E** was followed, using **1c** (88 mg, 0.2 mmol) for 18 h. Purification by column chromatography (eluted with 8% EtOAc in hexane) furnished **3c** (55 mg, 80% yield) as a brown solid.  $R_f$  0.71 (20 % EtOAc in hexane).

**<sup>1</sup>H NMR (400 MHz, CDCl<sub>3</sub>):**  $\delta$  7.56 (d,  $J$  = 8.4 Hz, 3H), 7.16 (d,  $J$  = 7.9 Hz, 2H), 6.86-6.82 (m, 2H), 5.77 (t,  $J$  = 1.5 Hz, 1H), 5.60 (d,  $J$  = 1.5 Hz, 1H), 5.31 (d,  $J$  = 1.0 Hz, 1H), 3.77 (s, 3H), 3.38 (s, 3H), 2.33 (s, 3H).

**<sup>13</sup>C NMR (100 MHz, CDCl<sub>3</sub>):**  $\delta$  157.2, 144.1, 141.7, 136.4, 134.9, 129.7, 129.6, 127.2, 117.6, 116.6, 109.5, 105.5, 93.5, 55.7, 52.8, 21.5.

**Melting point:** 98-100 °C.

**HRMS (ESI) Calcd.** for C<sub>18</sub>H<sub>19</sub>NO<sub>4</sub>S: [M-OCH<sub>3</sub>]<sup>+</sup>, 314.0845. Found:  $m/z$  314.0843.

### 5-fluoro-2-methoxy-3-methylene-1-tosylindoline (**3d**):

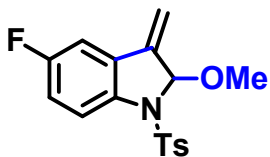

The representative general procedure **E** was followed, using **1d** (86 mg, 0.2 mmol) for 18 h. Purification by column chromatography (eluted with 10% EtOAc in hexane) furnished **3d** (49 mg, 74% yield) as a sticky brown solid.  $R_f$  0.71 (20 % EtOAc in hexane).

**$^1\text{H}$  NMR (400 MHz,  $\text{CDCl}_3$ ):**  $\delta$  7.60-7.57 (m, 3H), 7.19 (d,  $J = 8.0$  Hz, 2H), 7.01-6.94 (m, 2H), 5.84 (t,  $J = 1.6$  Hz, 1H), 5.64 (d,  $J = 1.5$  Hz, 1H), 5.39 (s, 1H), 3.37 (s, 3H), 2.35 (s, 3H).

**$^{13}\text{C}$  NMR (100 MHz,  $\text{CDCl}_3$ ):**  $\delta$  160.2 (d,  $J = 243.5$  Hz), 144.4, 140.9 (d,  $J = 2.8$  Hz), 138.7, 134.9, 130.1 (d,  $J = 8.7$  Hz), 129.7, 127.2, 117.6 (d,  $J = 8.5$  Hz), 117.0 (d,  $J = 24.1$  Hz), 110.8, 107.8 (d,  $J = 24.4$  Hz), 93.5, 52.9, 21.5.

**$^{19}\text{F}$  NMR (376 MHz):**  $\delta$  -118.2.

**HRMS (ESI) Calcd.** for  $\text{C}_{17}\text{H}_{16}\text{FNO}_3\text{S}$ :  $[\text{M}-\text{OCH}_3]^+$ , 302.0646. Found:  $m/z$  302.0652.

### 5-chloro-2-methoxy-3-methylene-1-tosylindoline (**3e**):

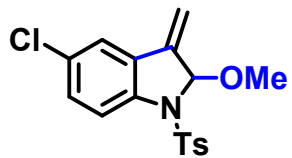

The representative general procedure **E** was followed, using **1e** (89 mg, 0.2 mmol) for 18 h. Purification by column chromatography (eluted with 8% EtOAc in hexane) furnished **3e** (44 mg, 63% yield) as a sticky yellow.  $R_f$  0.71 (20 % EtOAc in hexane).

**$^1\text{H}$  NMR (400 MHz,  $\text{CDCl}_3$ ):**  $\delta$  7.63 (d,  $J = 8.4$  Hz, 2H), 7.55 (d,  $J = 8.6$  Hz, 1H), 7.29 (d,  $J = 2.1$  Hz, 1H), 7.24-7.18 (m, 3H), 5.88 (t,  $J = 1.6$  Hz, 1H), 5.68 (d,  $J = 1.2$  Hz, 1H), 5.39 (s, 1H), 3.31 (s, 3H), 2.35 (s, 3H).

**$^{13}\text{C}$  NMR (100 MHz,  $\text{CDCl}_3$ ):**  $\delta$  144.5, 141.2, 140.2, 135.1, 130.1, 129.9, 129.8, 127.2, 121.1, 116.9, 110.8, 93.2, 52.4, 21.6.

**HRMS (ESI) Calcd.** for  $\text{C}_{17}\text{H}_{16}\text{ClNO}_3\text{S}$ :  $[\text{M}-\text{OCH}_3]^+$ , 318.0350. Found:  $m/z$  318.0392.

### 5-bromo-2-methoxy-3-methylene-1-tosylindoline (**3f**):

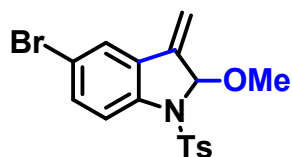

The representative general procedure **E** was followed, using **1f** (98 mg, 0.2 mmol) for 18 h. Purification by column chromatography (eluted with 8% EtOAc in hexane) furnished **3f** (62 mg, 79% yield) as a sticky yellow.  $R_f$  0.71 (20 % EtOAc in hexane).

**<sup>1</sup>H NMR (400 MHz, CDCl<sub>3</sub>):**  $\delta$  7.63 (d,  $J$  = 8.3 Hz, 2H), 7.49 (d,  $J$  = 8.6 Hz, 1H), 7.44 (d,  $J$  = 1.9 Hz, 1H), 7.36 (dd,  $J$  = 8.6, 2.0 Hz, 1H), 7.20 (d,  $J$  = 8.0 Hz, 2H), 5.88 (t,  $J$  = 1.6 Hz, 1H), 5.68 (d,  $J$  = 1.2 Hz, 1H), 5.39 (s, 3H), 3.29 (s, 3H), 2.35 (s, 3H).

**<sup>13</sup>C NMR (100 MHz, CDCl<sub>3</sub>):**  $\delta$  144.5, 141.7, 140.1, 135.1, 132.9, 130.1, 129.8, 127.2, 124.1, 117.3, 117.2, 110.8, 93.0, 52.4, 21.5.

**HRMS (ESI)** Calcd. for C<sub>17</sub>H<sub>16</sub>BrNO<sub>3</sub>S: [M-OCH<sub>3</sub>]<sup>+</sup>, 361.9845. Found: m/z 361.9841.

#### methyl 2-methoxy-3-methylene-1-tosylindoline-5-carboxylate (**3g**):

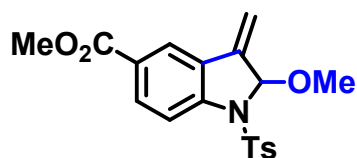

The representative general procedure **E** was followed, using **1g** (94 mg, 0.2 mmol) for 18 h. Purification by column chromatography (eluted with 10% EtOAc in hexane) furnished **3g** (49 mg, 65% yield) as a sticky yellow. R<sub>f</sub> 0.71 (20 % EtOAc in hexane).

**<sup>1</sup>H NMR (400 MHz, CDCl<sub>3</sub>):**  $\delta$  8.03 (d,  $J$  = 1.6 Hz, 1H), 7.96 (dd,  $J$  = 8.6, 1.7 Hz, 1H), 7.71 (d,  $J$  = 8.4 Hz, 2H), 7.62 (d,  $J$  = 8.5 Hz, 1H), 7.22 (d,  $J$  = 8.3 Hz, 2H), 6.02 (t,  $J$  = 1.5 Hz, 1H), 5.82 (d,  $J$  = 1.6 Hz, 1H), 5.44 (s, 1H), 3.89 (s, 3H), 3.23 (s, 3H), 2.36 (s, 3H).

**<sup>13</sup>C NMR (100 MHz, CDCl<sub>3</sub>):**  $\delta$  166.4, 146.2, 144.6, 139.9, 135.4, 132.0, 129.8, 127.9, 127.2, 125.9, 122.6, 114.5, 110.7, 93.2, 52.2, 51.9, 21.5.

**HRMS (ESI)** Calcd. for C<sub>19</sub>H<sub>19</sub>NO<sub>5</sub>S: [M-OCH<sub>3</sub>]<sup>+</sup>, 342.0795. Found: m/z 342.0797.

#### 2-methoxy-6-methyl-3-methylene-1-tosylindoline (**3h**):

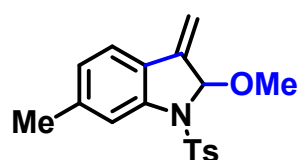

The representative general procedure **E** was followed, using **1h** (85 mg, 0.2 mmol) for 18 h. Purification by column chromatography (eluted with 8% EtOAc in hexane) furnished **3h** (55 mg, 83% yield) as a brown solid. R<sub>f</sub> 0.71 (20 % EtOAc in hexane).

**<sup>1</sup>H NMR (500 MHz, CDCl<sub>3</sub>):**  $\delta$  7.66 (d,  $J$  = 8.3 Hz, 2H), 7.45 (s, 1H), 7.23 (d,  $J$  = 7.8 Hz, 1H), 7.19 (d,  $J$  = 8.2 Hz, 2H), 6.85 (d,  $J$  = 7.8 Hz, 1H), 5.88 (s, 1H), 5.59 (d,  $J$  = 1.5 Hz, 1H), 5.27 (s, 1H), 3.28 (s, 3H), 2.37 (s, 3H), 2.35 (s, 3H).

**<sup>13</sup>C NMR (125 MHz, CDCl<sub>3</sub>):**  $\delta$  144.1, 142.9, 141.0, 140.8, 135.5, 129.6, 127.2, 125.5, 125.2, 120.7, 116.3, 108.0, 93.2, 52.0, 22.0, 21.5.

**Melting point:** 83-85 °C.

**HRMS (ESI)** Calcd. for C<sub>18</sub>H<sub>19</sub>NO<sub>3</sub>S: [M-OCH<sub>3</sub>]<sup>+</sup>, 298.0896. Found: m/z 298.0903.

#### 6-fluoro-2-methoxy-3-methylene-1-tosylindoline (**3i**):

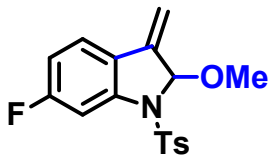

The representative general procedure **E** was followed, using **1i** (86 mg, 0.2 mmol) for 18 h. Purification by column chromatography (eluted with 10% EtOAc in hexane) furnished **3i** (55 mg, 82% yield) as a brown solid.  $R_f$  0.71 (20 % EtOAc in hexane).

$^1\text{H NMR}$  (400 MHz,  $\text{CDCl}_3$ ):  $\delta$  7.62 (d,  $J = 8.3$  Hz, 2H), 7.29-7.15 (m, 4H), 6.66 (td,  $J = 8.6, 2.3$  Hz, 1H), 5.86 (t,  $J = 1.6$  Hz, 1H), 5.54 (d,  $J = 1.4$  Hz, 1H), 5.24 (s, 1H), 3.19 (s, 3H), 2.29 (s, 3H).

$^{13}\text{C NMR}$  (100 MHz,  $\text{CDCl}_3$ ):  $\delta$  164.1 (d,  $J = 248.4$  Hz), 144.5, 144.0 (d,  $J = 11.9$  Hz), 140.0, 135.3, 129.8, 127.2, 123.9 (d,  $J = 2.5$  Hz), 122.1 (d,  $J = 10.1$  Hz), 111.3 (d,  $J = 23.5$  Hz), 108.7 (d,  $J = 2.7$  Hz), 103.6 (d,  $J = 28.4$  Hz), 93.4, 52.1, 21.6.

$^{19}\text{F NMR}$  (376 MHz):  $\delta$  -108.6.

**Melting point:** 88-90 °C.

**HRMS** (ESI) Calcd. for  $\text{C}_{17}\text{H}_{16}\text{FNO}_3\text{S}$ :  $[\text{M}-\text{OCH}_3]^+$ , 302.0646. Found:  $m/z$  302.0646.

#### 6-chloro-2-methoxy-3-methylene-1-tosylindoline (**3j**):

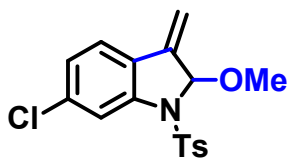

The representative general procedure **E** was followed, using **1j** (89 mg, 0.2 mmol) for 18 h. Purification by column chromatography (eluted with 8% EtOAc in hexane) furnished **3j** (51 mg, 73% yield) as a brown solid.  $R_f$  0.71 (20 % EtOAc in hexane).

$^1\text{H NMR}$  (400 MHz,  $\text{CDCl}_3$ ):  $\delta$  7.68 (d,  $J = 8.4$  Hz, 2H), 7.62 (d,  $J = 1.8$  Hz, 1H), 7.26-7.21 (m, 3H), 6.99 (dd,  $J = 8.2, 1.8$  Hz, 1H), 5.92 (t,  $J = 1.6$  Hz, 1H), 5.67 (d,  $J = 1.3$  Hz, 1H), 5.36 (d,  $J = 0.9$  Hz, 1H), 3.25 (s, 3H), 2.36 (s, 3H).

$^{13}\text{C NMR}$  (100 MHz,  $\text{CDCl}_3$ ):  $\delta$  144.5, 143.6, 140.1, 135.9, 135.2, 129.8, 127.2, 126.5, 124.4, 121.7, 115.8, 109.8, 93.2, 52.1, 21.6.

**Melting point:** 80-82 °C.

**HRMS** (ESI) Calcd. for  $\text{C}_{17}\text{H}_{16}\text{ClNO}_3\text{S}$ :  $[\text{M}-\text{OCH}_3]^+$ , 318.0350. Found:  $m/z$  318.0386.

#### 6-bromo-2-methoxy-3-methylene-1-tosylindoline (**3k**):

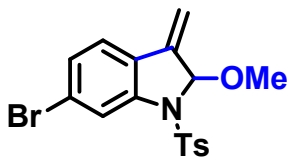

The representative general procedure **E** was followed, using **1k** (98 mg, 0.2 mmol) for 18 h. Purification by column chromatography (eluted with 8% EtOAc in hexane) furnished **3k** (67 mg, 85% yield) as a brown solid.  $R_f$  0.71 (20 % EtOAc in hexane).

**<sup>1</sup>H NMR (400 MHz, CDCl<sub>3</sub>):**  $\delta$  7.79 (d,  $J$  = 1.5 Hz, 1H), 7.68 (d,  $J$  = 8.3 Hz, 2H), 7.26-7.14 (m, 4H), 5.92 (t,  $J$  = 1.6 Hz, 1H), 5.69 (d,  $J$  = 1.7 Hz, 1H), 5.38 (d,  $J$  = 0.9 Hz, 1H), 3.25 (s, 3H), 2.37 (s, 3H).

**<sup>13</sup>C NMR (100 MHz, CDCl<sub>3</sub>):**  $\delta$  144.5, 143.7, 140.2, 135.2, 129.8, 127.3, 127.2, 126.9, 123.9, 122.0, 118.7, 110.0, 93.1, 52.1, 21.6.

**Melting point:** 98-100 °C.

**HRMS (ESI) Calcd.** for C<sub>17</sub>H<sub>16</sub>BrNO<sub>3</sub>S: [M-OCH<sub>3</sub>]<sup>+</sup>, 361.9845. Found: m/z 361.9844.

### 2-methoxy-3-methylene-1-(phenylsulfonyl)indoline (3l):

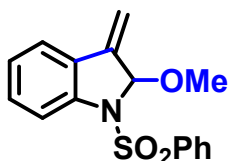

The representative general procedure E was followed, using **1l** (79 mg, 0.2 mmol) for 18 h. Purification by column chromatography (eluted with 8% EtOAc in hexane) furnished **3l** (49 mg, 82% yield) as a yellow solid. R<sub>f</sub> 0.71 (20 % EtOAc in hexane).

**<sup>1</sup>H NMR (400 MHz, CDCl<sub>3</sub>):**  $\delta$  7.75 (d,  $J$  = 7.6 Hz, 2H), 7.59 (d,  $J$  = 8.1 Hz, 1H), 7.48 (t,  $J$  = 7.4 Hz, 1H), 7.39-7.35 (m, 2H), 7.31 (d,  $J$  = 7.6 Hz, 1H), 7.23 (d,  $J$  = 7.1 Hz, 1H), 7.01 (t,  $J$  = 7.5 Hz, 1H), 5.88 (s, 1H), 5.65 (d,  $J$  = 1.3 Hz, 1H), 5.32 (s, 1H), 3.26 (s, 3H).

**<sup>13</sup>C NMR (125 MHz, CDCl<sub>3</sub>):**  $\delta$  142.6, 141.1, 138.4, 133.3, 130.2, 129.0, 128.1, 127.2, 124.4, 121.0, 115.7, 109.4, 92.9, 52.3.

**Melting point:** 60-62°C.

**HRMS (ESI) Calcd.** for C<sub>16</sub>H<sub>15</sub>NO<sub>3</sub>S: [M-OCH<sub>3</sub>]<sup>+</sup>, 270.0583. Found: m/z 270.0583.

### 2-methoxy-3-methylene-1-(methylsulfonyl)indoline (3m):

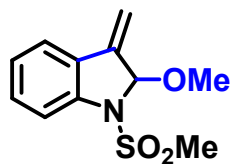

The representative general procedure E was followed, using **1m** (67 mg, 0.2 mmol) for 18 h. Purification by column chromatography (eluted with 15% EtOAc in hexane) furnished **3m** (40 mg, 84% yield) as a brown solid. R<sub>f</sub> 0.51 (20 % EtOAc in hexane).

**<sup>1</sup>H NMR (400 MHz, CDCl<sub>3</sub>):**  $\delta$  7.49-7.45 (m, 2H), 7.32-7.28 (m, 1H), 7.10 (td,  $J$  = 7.5, 0.9 Hz, 1H), 5.85 (t,  $J$  = 1.5 Hz, 1H), 5.82 (d,  $J$  = 1.6 Hz, 1H), 5.46 (d,  $J$  = 1.1 Hz, 1H), 3.39 (s, 3H), 2.96 (s, 3H).

**<sup>13</sup>C NMR (125 MHz, CDCl<sub>3</sub>):**  $\delta$  142.6, 141.0, 130.5, 127.5, 124.2, 121.4, 114.5, 109.6, 93.0, 52.8, 39.0.

**Melting point:** 78-80 °C.

**HRMS (ESI) Calcd.** for C<sub>11</sub>H<sub>13</sub>NO<sub>3</sub>S: [M-OCH<sub>3</sub>]<sup>+</sup>, 208.0427. Found: m/z 208.0425.

### tert-butyl 2-methoxy-3-methyleneindoline-1-carboxylate (**3n**):

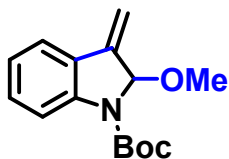

The representative general procedure **E** was followed, using **1n** (72 mg, 0.2 mmol) for 18 h. Purification by column chromatography (eluted with 8% EtOAc in hexane) furnished **3n** (44 mg, 83% yield) as a sticky yellow solid.  $R_f$  0.71 (20 % EtOAc in hexane).

$^1\text{H NMR}$  (500 MHz,  $\text{CDCl}_3$ ):  $\delta$  7.67 (br, 1H), 7.35 (d,  $J = 7.5$  Hz, 1H), 7.17 (t,  $J = 7.6$  Hz, 1H), 6.92 (t,  $J = 7.5$  Hz, 1H), 5.86 (s, 1H), 5.67 (d,  $J = 1.2$  Hz, 1H), 5.32 (s, 1H), 3.20 (s, 3H), 1.51 (s, 9H).

$^{13}\text{C NMR}$  (125 MHz,  $\text{CDCl}_3$ ):  $\delta$  152.0, 143.6, 141.8, 130.0, 127.0, 122.8, 120.3, 115.5, 108.0, 90.1, 81.8, 52.0, 28.4.

HRMS (ESI) Calcd. for  $\text{C}_{15}\text{H}_{19}\text{NO}_3$ :  $[\text{M}+\text{Na}]^+$ , 284.1263. Found:  $m/z$  284.1259.

### ethyl 2-methoxy-3-methyleneindoline-1-carboxylate (**3o**):

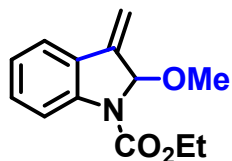

The representative general procedure **E** was followed, using **1o** (66 mg, 0.2 mmol) for 18 h. Purification by column chromatography (eluted with 8% EtOAc in hexane) furnished **3o** (36 mg, 77% yield) as a sticky yellow.  $R_f$  0.71 (20 % EtOAc in hexane).

$^1\text{H NMR}$  (400 MHz,  $\text{CDCl}_3$ ):  $\delta$  7.81 (br, 1H), 7.45 (dd,  $J = 7.6, 0.6$  Hz, 1H), 7.30-7.25 (m, 1H), 7.03 (td,  $J = 7.5, 0.9$  Hz, 1H), 6.02 (t,  $J = 1.5$  Hz, 1H), 5.78 (d,  $J = 1.8$  Hz, 1H), 5.42 (d,  $J = 1.4$  Hz, 1H), 4.39-4.31 (m, 2H), 3.26 (s, 3H), 1.39 (t,  $J = 7.1$  Hz, 3H).

$^{13}\text{C NMR}$  (100 MHz,  $\text{CDCl}_3$ ):  $\delta$  153.1, 141.5, 130.2, 127.0, 123.2, 123.1, 120.5, 115.5, 108.5, 108.4, 89.9, 53.0, 62.1, 14.6.

HRMS (ESI) Calcd. for  $\text{C}_{13}\text{H}_{15}\text{NO}_3$ :  $[\text{M}+\text{Na}]^+$ , 256.0950. Found:  $m/z$  256.0941.

### 2-methoxy-3-methylene-1-tosyl-2,3-dihydro-1H-pyrrolo[2,3-b]pyridine (**3p**):

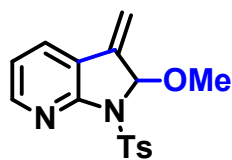

The representative general procedure **E** was followed, using **1p** (82 mg, 0.2 mmol) for 18 h. Purification by column chromatography (eluted with 8% EtOAc in hexane) furnished **3p** (52 mg, 82% yield) as a yellow solid.  $R_f$  0.71 (20 % EtOAc in hexane).

$^1\text{H NMR}$  (400 MHz,  $\text{CDCl}_3$ ):  $\delta$  8.15 (dd,  $J = 5.1, 1.6$  Hz, 1H), 7.97 (d,  $J = 8.4$  Hz, 2H), 7.54 (dd,  $J = 7.5, 1.6$  Hz, 1H), 7.19 (d,  $J = 8.0$  Hz, 2H), 6.83 (dd,  $J = 7.5, 5.1$  Hz, 1H), 6.13 (t,  $J = 1.6$  Hz, 1H), 5.75 (d,  $J = 1.5$  Hz, 1H), 5.47 (s, 1H), 3.10 (s, 3H), 2.31 (s, 3H).

$^{13}\text{C NMR}$  (125 MHz,  $\text{CDCl}_3$ ):  $\delta$  155.9, 149.2, 144.2, 138.5, 136.8, 129.3, 128.7, 128.1, 120.7, 118.6, 111.9, 91.0, 51.8, 21.6.



**Melting point:** 95-96 °C.

**HRMS (ESI)** Calcd. for C<sub>16</sub>H<sub>16</sub>N<sub>2</sub>O<sub>3</sub>S: [M+H]<sup>+</sup>, 317.0960. Found: m/z 317.0958.

### 3-methoxy-4-methylene-2-tosyl-1,2,3,4-tetrahydroisoquinoline (3q)<sup>9</sup>:

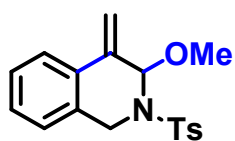

The representative general procedure **E** was followed, using **1q** (75 mg, 0.2 mmol), for 18 h. Purification by column chromatography (eluted with 7% EtOAc in hexane) furnished **3q** (58mg, 88% yield) as a yellow liquid. R<sub>f</sub> 0.71 (20 % EtOAc in hexane).

**<sup>1</sup>H NMR (400 MHz, CDCl<sub>3</sub>):** δ 7.66 (d, *J* = 7.9 Hz, 2H), 7.52 (d, *J* = 6.1 Hz, 1H), 7.19 (d, *J* = 7.5 Hz, 4H), 7.02 (d, *J* = 6.0 Hz, 1H), 5.65 (d, *J* = 8.1 Hz, 2H), 5.25 (s, 1H), 4.56 (d, *J* = 16.1 Hz, 1H), 4.37 (d, *J* = 16.1 Hz, 1H), 3.36 (s, 3H), 2.35 (s, 3H).

**<sup>13</sup>C NMR (125 MHz, CDCl<sub>3</sub>):** δ 143.5, 137.8, 136.2, 130.8, 129.8, 129.4, 128.4, 127.4, 127.2, 125.9, 124.8, 112.5, 87.3, 54.9, 43.2, 21.5.

**HRMS (ESI)** Calcd. for C<sub>18</sub>H<sub>19</sub>NO<sub>3</sub>S: [M+Na]<sup>+</sup>, 352.0983. Found: m/z 352.0974.

### 3-methoxy-4-methylene-2-phenyl-3,4-dihydroisoquinolin-1(2H)-one (3r)<sup>9</sup>:

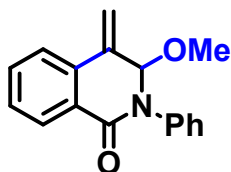

The representative general procedure **E** was followed, using **1r** (72 mg, 0.2 mmol), for 18 h. Purification by column chromatography (eluted with 10% EtOAc in hexane) furnished **3r** (44 mg, 84% yield) as a sticky red. R<sub>f</sub> 0.71 (20 % EtOAc in hexane).

**<sup>1</sup>H NMR (400 MHz, CDCl<sub>3</sub>):** δ 8.22 (dd, *J* = 7.8, 0.9 Hz, 1H), 7.65-7.62 (m, 1H), 7.58 (td, *J* = 7.3, 1.4 Hz, 1H), 7.50-7.41 (m, 5H), 7.35-7.30 (m, 1H), 5.87 (s, 1H), 5.42 (s, 1H), 5.18 (s, 1H), 3.23 (s, 3H).

**<sup>13</sup>C NMR (100 MHz, CDCl<sub>3</sub>):** δ 163.3, 141.8, 136.5, 133.8, 132.7, 129.1, 129.0, 128.8, 127.2, 126.8, 123.9, 115.9, 93.4, 54.1.

**HRMS (ESI)** Calcd. for C<sub>17</sub>H<sub>15</sub>NO<sub>2</sub>: [M+H]<sup>+</sup>, 266.1181. Found: m/z 266.1179.

### 3-methoxy-7-methyl-4-methylene-2-phenyl-3,4-dihydroisoquinolin-1(2H)-one (3s):

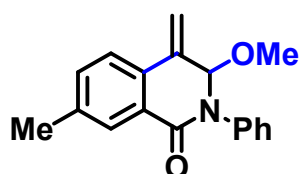

The representative general procedure **E** was followed, using **1s** (75 mg, 0.2 mmol) for 18 h. Purification by column chromatography (eluted with 8% EtOAc in hexane) furnished **3s** (49 mg, 88% yield) as a sticky yellow. R<sub>f</sub> 0.71 (20 % EtOAc in hexane).

**<sup>1</sup>H NMR (400 MHz, CDCl<sub>3</sub>):**  $\delta$  8.02 (s, 1H), 7.53 (d,  $J$  = 7.9 Hz, 1H), 7.49-7.37 (m, 5H), 7.34-7.30 (m, 1H), 5.82 (s, 1H), 5.36 (s, 1H), 5.16 (s, 1H), 3.22 (s, 3H), 2.43 (s, 3H).

**<sup>13</sup>C NMR (125 MHz, CDCl<sub>3</sub>):**  $\delta$  163.5, 141.9, 139.3, 136.4, 134.7, 133.6, 131.1, 129.0, 127.1, 126.9, 126.8, 123.9, 114.9, 93.4, 54.1, 21.3.

**HRMS (ESI) Calcd.** for C<sub>18</sub>H<sub>17</sub>NO<sub>2</sub>: [M+H]<sup>+</sup>, 280.1338. Found: m/z 280.1341.

### 7-chloro-3-methoxy-4-methylene-2-phenyl-3,4-dihydroisoquinolin-1(2H)-one (3t):

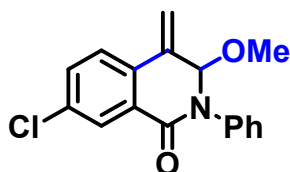

The representative general procedure **E** was followed, using **1t** (79 mg, 0.2 mmol) for 18 h. Purification by column chromatography (eluted with 8% EtOAc in hexane) furnished **3t** (50 mg, 83% yield) as a pale yellow solid.  $R_f$  0.71 (20 % EtOAc in hexane).

**<sup>1</sup>H NMR (400 MHz, CDCl<sub>3</sub>):**  $\delta$  8.15 (d,  $J$  = 8.4 Hz, 1H), 7.60 (d,  $J$  = 1.8 Hz, 1H), 7.45-7.41 (m, 5H), 7.36-7.31 (m, 1H), 5.87 (s, 1H), 5.46 (s, 1H), 5.16 (s, 1H), 3.22 (s, 3H).

**<sup>13</sup>C NMR (125 MHz, CDCl<sub>3</sub>):**  $\delta$  162.5, 141.5, 138.9, 135.6, 135.3, 130.6, 129.3, 129.1, 127.4, 126.8, 125.7, 124.1, 116.9, 93.3, 54.3.

**Melting point:** 118-120 °C.

**HRMS (ESI) Calcd.** for C<sub>17</sub>H<sub>14</sub>ClNO<sub>2</sub>: [M+H]<sup>+</sup>, 300.0791. Found: m/z 300.0788.

### 3-methoxy-5-methyl-4-methylene-2-phenyl-3,4-dihydroisoquinolin-1(2H)-one (3u):

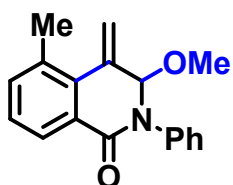

The representative general procedure **E** was followed, using **1u** (75 mg, 0.2 mmol) for 18 h. Purification by column chromatography (eluted with 8% EtOAc in hexane) furnished **3u** (42 mg, 75% yield) as a yellow solid.  $R_f$  0.72 (20 % EtOAc in hexane).

**<sup>1</sup>H NMR (400 MHz, CDCl<sub>3</sub>):**  $\delta$  8.09 (dd,  $J$  = 7.7, 0.8 Hz, 1H), 7.49-7.41 (m, 5H), 7.38-7.29 (m, 2H), 5.71 (s, 1H), 5.66 (s, 1H), 5.07 (s, 1H), 3.22 (s, 3H), 2.57 (s, 3H).

**<sup>13</sup>C NMR (125 MHz, CDCl<sub>3</sub>):**  $\delta$  163.5, 141.8, 136.6, 135.4, 135.1, 132.4, 129.0, 128.7, 128.1, 127.1, 126.9, 126.6, 120.0, 95.1, 54.5, 21.2.

**Melting point:** 123-125 °C.

**HRMS (ESI) Calcd.** for C<sub>18</sub>H<sub>17</sub>NO<sub>2</sub>: [M+H]<sup>+</sup>, 280.1338. Found: m/z 280.1326.

### 2-methoxy-1-methylene-3-tosyl-2,3,4,5-tetrahydro-1H-benzo[d]azepine (3v):

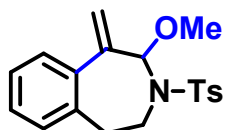

The representative general procedure **E** was followed, using **1v** (88 mg, 0.2 mmol) for 18 h. Purification by column chromatography (eluted with 7%

EtOAc in hexane) furnished **3v** (15 mg, 22% yield) as a yellow liquid.  $R_f$  0.71 (20 % EtOAc in hexane).

**$^1\text{H}$  NMR (400 MHz,  $\text{CDCl}_3$ ):**  $\delta$  7.63 (d,  $J = 8.3$  Hz, 2H), 7.21-7.13 (m, 5H), 6.96-6.94 (m, 1H), 5.79 (s, 1H), 5.41 (s, 1H), 5.26 (d,  $J = 0.9$  Hz, 1H), 3.65-3.59 (m, 1H), 3.48-3.40 (m, 1H), 3.29 (s, 3H), 2.89-2.74 (m, 2H), 2.38 (s, 3H).

**$^{13}\text{C}$  NMR (125 MHz,  $\text{CDCl}_3$ ):**  $\delta$  144.1, 140.1, 135.3, 134.7, 129.9, 129.4, 128.7, 127.3, 127.1, 126.8, 126.5, 114.7, 77.8, 57.0, 49.4, 35.4, 21.5.

**HRMS (ESI)** Calcd. for  $\text{C}_{19}\text{H}_{21}\text{NO}_3\text{S}$ :  $[\text{M}-\text{OCH}_3]^+$ , 312.1053. Found:  $m/z$  312.1050.

#### 5-(methoxymethyl)-3-tosyl-2,3-dihydro-1H-benzo[d]azepine (**4v**):

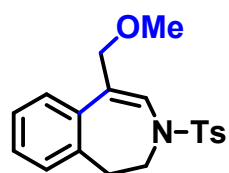

The representative general procedure **E** was followed, using **1v** (88 mg, 0.2 mmol) for 18 h. Purification by column chromatography (eluted with 8% EtOAc in hexane) furnished **4v** (21 mg, 31% yield) as a yellow liquid.  $R_f$  0.58 (20 % EtOAc in hexane).

**$^1\text{H}$  NMR (400 MHz,  $\text{CDCl}_3$ ):**  $\delta$  7.68 (d,  $J = 8.3$  Hz, 2H), 7.51 (dd,  $J = 8.0, 0.7$  Hz, 1H), 7.29 (d,  $J = 8.0$  Hz, 2H), 7.23-7.19 (m, 2H), 7.09 (td,  $J = 7.4, 1.1$  Hz, 1H), 6.97 (dd,  $J = 7.4, 0.8$  Hz, 1H), 4.31 (s, 2H), 3.78-3.76 (m, 2H), 3.34 (s, 3H), 2.80-2.78 (m, 2H), 2.40 (s, 3H).

**$^{13}\text{C}$  NMR (125 MHz,  $\text{CDCl}_3$ ):**  $\delta$  144.1, 140.1, 135.3, 134.7, 129.9, 129.4, 128.7, 127.3, 127.1, 126.8, 126.5, 114.7, 77.8, 57.0, 49.4, 35.4, 21.5.

**HRMS (ESI)** Calcd. for  $\text{C}_{19}\text{H}_{21}\text{NO}_3\text{S}$ :  $[\text{M}-\text{OCH}_3]^+$ , 312.1053. Found:  $m/z$  312.1057.

#### 2-methoxy-3-methylene-2,3-dihydrobenzofuran (**3w**):

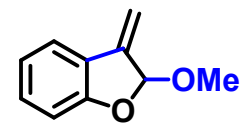

The representative general procedure **E** was followed, using **1w** (77 mg, 0.3 mmol) for 18 h. Purification by column chromatography (eluted with 2% EtOAc in hexane) furnished **3w** (32 mg, 66% yield) as a yellow liquid.  $R_f$  0.51 (5 % EtOAc in hexane).

**$^1\text{H}$  NMR (400 MHz,  $\text{CDCl}_3$ ):**  $\delta$  7.40 (dd,  $J = 7.5, 0.8$  Hz, 1H), 7.25-7.20 (m, 1H), 6.92 (td,  $J = 7.5, 0.9$  Hz, 1H), 6.87 (d,  $J = 8.1$  Hz, 1H), 5.98 (t,  $J = 1.9$  Hz, 1H), 5.70 (d,  $J = 2.1$  Hz, 1H), 5.34 (d,  $J = 1.7$  Hz, 1H) 3.52 (s, 3H).

**$^{13}\text{C}$  NMR (125 MHz,  $\text{CDCl}_3$ ):**  $\delta$  160.9, 143.2, 130.7, 124.3, 121.1, 121.0, 110.5, 107.1, 106.9, 54.5.

**HRMS (ESI)** Calcd. for  $\text{C}_{10}\text{H}_{10}\text{O}_2$ :  $[\text{M}-2\text{H}]^+$ , 161.0597. Found:  $m/z$  161.0599.

#### 5-chloro-2-methoxy-3-methylene-2,3-dihydrobenzofuran (**3x**):

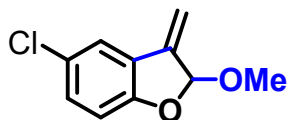

The representative general procedure **E** was followed, using **1x** (88 mg, 0.3 mmol) for 18 h. Purification by column chromatography (eluted with 2% EtOAc in hexane) furnished **3x** (31 mg, 53% yield) as a yellow liquid.  $R_f$  0.53 (5% EtOAc in hexane).

$^1\text{H NMR}$  (400 MHz,  $\text{CDCl}_3$ ):  $\delta$  7.35 (d,  $J = 2.2$  Hz, 1H), 7.17 (dd,  $J = 8.6, 2.3$  Hz, 1H), 6.79 (d,  $J = 8.5$  Hz, 1H), 5.98 (t,  $J = 1.9$  Hz, 1H), 5.70 (d,  $J = 2.0$  Hz, 1H), 5.38 (d,  $J = 1.7$  Hz, 1H) 3.51 (s, 3H).

$^{13}\text{C NMR}$  (125 MHz,  $\text{CDCl}_3$ ):  $\delta$  159.5, 142.2, 130.5, 126.2, 125.9, 121.1, 111.5, 108.5, 107.7, 54.7.

HRMS (ESI) Calcd. for  $\text{C}_{10}\text{H}_9\text{ClO}_2$ :  $[\text{M}-2\text{H}]^+$ , 195.0207. Found:  $m/z$  195.0202.

### 2-ethoxy-3-methylene-1-tosylindoline (**3aa**):

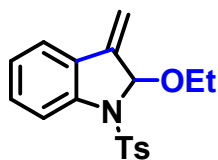

The representative general procedure **E** was followed, using **1a** (82 mg, 0.2 mmol), and **Ethanol** (3ml) at 50°C for 18 h. Purification by column chromatography (eluted with 8% EtOAc in hexane) furnished **3aa** (35 mg, 53% yield) as a yellow liquid.  $R_f$  0.71 (20 % EtOAc in hexane).

$^1\text{H NMR}$  (400 MHz,  $\text{CDCl}_3$ ):  $\delta$  7.64 (d,  $J = 8.3$  Hz, 2H), 7.60 (d,  $J = 8.1$  Hz, 1H), 7.33 (dd,  $J = 7.6, 0.6$  Hz, 1H), 7.27-7.23 (m, 1H), 7.18 (d,  $J = 7.9$  Hz, 2H), 7.03 (td,  $J = 7.5, 0.9$  Hz, 1H), 5.92 (t,  $J = 1.6$  Hz, 1H), 5.64 (d,  $J = 1.6$  Hz, 1H), 5.34 (d,  $J = 1.3$  Hz, 1H), 3.77-3.69 (m, 1H), 3.61-3.54 (m, 1H), 2.34 (s, 3H), 1.19 (t,  $J = 7.0$  Hz, 3H).

$^{13}\text{C NMR}$  (125 MHz,  $\text{CDCl}_3$ ):  $\delta$  144.1, 142.7, 141.9, 135.5, 130.1, 129.6, 128.2, 127.2, 124.3, 121.0, 116.0, 109.1, 92.3, 61.2, 21.5, 15.0.

HRMS (ESI) Calcd. for  $\text{C}_{18}\text{H}_{19}\text{NO}_3\text{S}$ :  $[\text{M}+\text{Na}]^+$ , 352.0983. Found:  $m/z$  352.0982.

### 2-(methoxy- $d_3$ )-3-methylene-1-tosylindoline (**3a-D**):

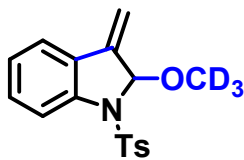

The representative general procedure **E** was followed, using **1a** (82 mg, 0.2 mmol), and  $\text{CD}_3\text{OD}$  (3mL) for 18 h. Purification by column chromatography (eluted with 8% EtOAc in hexane) furnished **3a-D** (31 mg, 49% yield) as a brown solid.  $R_f$  0.71 (% EtOAc in hexane).

$^1\text{H NMR}$  (400 MHz,  $\text{CDCl}_3$ ):  $\delta$  7.66 (d,  $J = 8.3$  Hz, 2H), 7.61 (d,  $J = 8.1$  Hz, 1H), 7.34 (d,  $J = 7.6$  Hz, 1H), 7.28-7.24 (m, 1H), 7.18 (d,  $J = 8.1$  Hz, 2H), 7.04 (td,  $J = 7.5, 0.8$  Hz, 1H), 5.89 (t,  $J = 1.5$  Hz, 1H), 5.68 (d,  $J = 1.5$  Hz, 1H), 5.35 (s, 1H), 2.34 (s, 3H).

**Melting point:** 86-88 °C.

HRMS (ESI) Calcd. for  $\text{C}_{17}\text{H}_{14}\text{D}_3\text{NO}_3\text{S}$ :  $[\text{M}+\text{Na}]^+$ , 341.1015. Found:  $m/z$  341.1001.

### 3-(piperidin-1-ylmethyl)-1-tosyl-1H-indole (4ad):

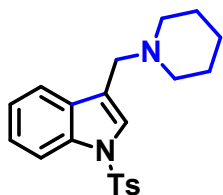

The representative general procedure **F** was followed, using **1a** (123 mg, 0.3 mmol) for 18 h. Purification by column chromatography (eluted with 20% acetone in hexane) furnished **4ad** (62 mg, 56% yield) as a sticky yellow.  $R_f$  0.52 (30 % acetone in hexane).

**$^1\text{H}$  NMR (500 MHz,  $\text{CDCl}_3$ ):**  $\delta$  7.96 (d,  $J = 8.3$  Hz, 1H), 7.74 (d,  $J = 8.3$  Hz, 2H), 7.65 (d,  $J = 7.8$  Hz, 1H), 7.49 (s, 1H), 7.29 (t,  $J = 7.7$  Hz, 1H), 7.22 (d,  $J = 7.4$  Hz, 1H), 7.19 (d,  $J = 8.3$  Hz, 2H), 3.61 (s, 2H), 2.41 (br, 4H), 2.32 (s, 3H), 1.59-1.54 (m, 4H), 1.41 (br, 2H).

**$^{13}\text{C}$  NMR (125 MHz,  $\text{CDCl}_3$ ):**  $\delta$  144.8, 135.4, 135.3, 131.2, 129.8, 126.8, 125.0, 124.6, 123.1, 120.4, 119.3, 113.6, 54.3, 53.6, 25.8, 24.2, 21.5.

**HRMS (ESI) Calcd.** for  $\text{C}_{21}\text{H}_{24}\text{N}_2\text{O}_2\text{S}$ :  $[\text{M}+\text{H}]^+$ , 369.1637. Found:  $m/z$  369.1629.

### 3-(methoxymethyl)-1H-indole (4a):<sup>10</sup>

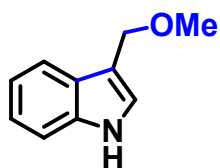

The representative general procedure **E** was followed, using **1'a** (90 mg, 0.3 mmol) for 18 h. Purification by column chromatography (eluted with 12% EtOAc in hexane) furnished **4a** (38 mg, 79% yield) as a yellow solid.  $R_f$  0.51 (20 % EtOAc in hexane).

**$^1\text{H}$  NMR (400 MHz,  $\text{CDCl}_3$ ):**  $\delta$  8.17 (brs, 1H), 7.73-7.71 (m, 1H), 7.37-7.34 (m, 1H), 7.23-7.19 (m, 1H), 7.18-7.13 (m, 2H), 4.68 (d,  $J = 0.6$  Hz, 2H), 3.40 (s, 3H).

**$^{13}\text{C}$  NMR (100 MHz,  $\text{CDCl}_3$ ):**  $\delta$  135.4, 126.1, 122.7, 121.3, 118.8, 118.1, 112.2, 110.1, 65.5, 56.5.

**Melting point:** 98-99 °C.

**HRMS (ESI) Calcd.** for  $\text{C}_{10}\text{H}_{11}\text{NO}$ :  $[\text{M}-\text{OCH}_3]^+$ , 130.0651. Found:  $m/z$  130.0650.

### 3-(methoxymethyl)-5-methyl-1H-indole (4b):<sup>10</sup>

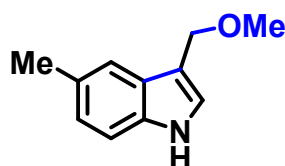

The representative general procedure **E** was followed, using **1'b** (94 mg, 0.3 mmol) for 18 h. Purification by column chromatography (eluted with 12% EtOAc in hexane) furnished **4b** (41 mg, 77% yield) as a sticky brown.  $R_f$  0.51 (20 % EtOAc in hexane).

**<sup>1</sup>H NMR (400 MHz, D<sub>6</sub>-acetone):**  $\delta$  9.99 (brs, 1H), 7.44 (d,  $J$  = 0.7 Hz, 1H), 7.28 (d,  $J$  = 8.3 Hz, 1H), 7.24 (d,  $J$  = 2.3 Hz, 1H), 6.96 (dd,  $J$  = 8.3, 1.4 Hz, 1H), 4.60 (s, 2H), 3.29 (s, 3H), 2.41 (s, 3H).

**<sup>13</sup>C NMR (100 MHz, D<sub>6</sub>-acetone):**  $\delta$  136.2, 128.8, 128.6, 125.4, 123.9, 119.5, 112.9, 111.9, 67.0, 57.1, 21.6.

**HRMS (ESI) Calcd.** for C<sub>11</sub>H<sub>13</sub>NO: [M-OCH<sub>3</sub>]<sup>+</sup>, 144.0808. Found: m/z 144.0803.

#### 5-fluoro-3-(methoxymethyl)-1H-indole (4c):<sup>10</sup>

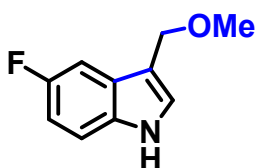

The representative general procedure E was followed, using **1'c** (95 mg, 0.3 mmol) for 18 h. Purification by column chromatography (eluted with 12% EtOAc in hexane) furnished **4c** (37 mg, 68% yield) as a sticky brown. R<sub>f</sub> 0.51 (20 % EtOAc in hexane).

**<sup>1</sup>H NMR (400 MHz, D<sub>6</sub>-acetone):**  $\delta$  10.26 (brs, 1H), 7.41-7.37 (m, 2H), 7.31 (dd,  $J$  = 9.9, 2.5 Hz, 1H), 6.91 (td,  $J$  = 9.2, 2.5 Hz, 1H), 4.59 (s, 2H), 3.28 (s, 3H).

**<sup>13</sup>C NMR (100 MHz, D<sub>6</sub>-acetone):**  $\delta$  158.5 (d,  $J$  = 232.1 Hz), 134.4, 128.7 (d,  $J$  = 9.9 Hz), 127.3, 113.8 (d,  $J$  = 4.7 Hz), 113.1 (d,  $J$  = 9.6 Hz), 110.4 (d,  $J$  = 26.4 Hz), 104.4 (d,  $J$  = 23.4 Hz), 66.8, 57.2.

**<sup>19</sup>F NMR (376 MHz, D<sub>6</sub>-acetone):**  $\delta$  -126.7.

**HRMS (ESI) Calcd.** for C<sub>10</sub>H<sub>10</sub>FNO: [M-OCH<sub>3</sub>]<sup>+</sup>, 148.0557. Found: m/z 148.0551.

#### 5-chloro-3-(methoxymethyl)-1H-indole (4d):<sup>10</sup>

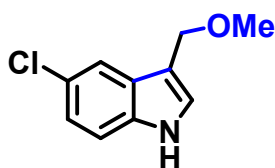

The representative general procedure E was followed, using **1'd** (100 mg, 0.3 mmol) for 18 h. Purification by column chromatography (eluted with 12% EtOAc in hexane) furnished **4d** (41 mg, 70% yield) as a sticky yellow. R<sub>f</sub> 0.51 (20 % EtOAc in hexane).

**<sup>1</sup>H NMR (500 MHz, D<sub>6</sub>-acetone):**  $\delta$  10.35 (brs, 1H), 7.64 (d,  $J$  = 1.9 Hz, 1H), 7.41 (d,  $J$  = 8.6 Hz, 1H), 7.38 (d,  $J$  = 2.1 Hz, 1H), 7.11 (dd,  $J$  = 8.6, 1.7 Hz, 1H), 4.60 (s, 2H), 3.29 (s, 3H).

**<sup>13</sup>C NMR (125 MHz, D<sub>6</sub>-acetone):**  $\delta$  136.2, 129.5, 126.9, 125.2, 122.4, 119.2, 113.6, 113.4, 66.8, 57.3.

**HRMS (ESI) Calcd.** for C<sub>10</sub>H<sub>10</sub>ClNO: [M-OCH<sub>3</sub>]<sup>+</sup>, 164.0262. Found: m/z 164.0251.

#### 5-bromo-3-(methoxymethyl)-1H-indole (4e):<sup>10</sup>

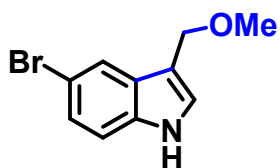

The representative general procedure **E** was followed, using **1'e** (113 mg, 0.3 mmol), for 18 h. Purification by column chromatography (eluted with 12% EtOAc in hexane) furnished **4e** (49 mg, 68% yield) as a pale yellow solid.  $R_f$  0.51 (20 % EtOAc in hexane).

**$^1\text{H}$  NMR (400 MHz,  $\text{D}_4$ -methanol):**  $\delta$  7.73 (d,  $J = 1.5$  Hz, 1H), 7.28-7.26 (m, 2H), 7.20 (dd,  $J = 8.6, 1.9$  Hz, 1H), 4.60 (s, 2H), 3.33 (s, 3H).

**$^{13}\text{C}$  NMR (100 MHz,  $\text{D}_4$ -methanol):**  $\delta$  136.9, 130.2, 127.2, 125.4, 122.3, 113.9, 113.3, 112.7, 67.3, 57.4.

**Melting point:** 94-96 °C.

**HRMS (ESI) Calcd.** for  $\text{C}_{10}\text{H}_{10}\text{BrNO}$ :  $[\text{M}-\text{OCH}_3]^+$ , 207.9756. Found:  $m/z$  207.9757.

### 3-(methoxymethyl)-1H-indole-5-carbonitrile (**4f**):

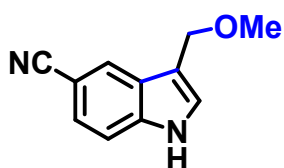

The representative general procedure **E** was followed, using **1'f** (97 mg, 0.3 mmol) for 18 h. Purification by column chromatography (eluted with 12% EtOAc in hexane) furnished **4f** (36 mg, 65% yield) as a sticky brown.  $R_f$  0.51 (20 % EtOAc in hexane).

**$^1\text{H}$  NMR (400 MHz,  $\text{D}_4$ -methanol):**  $\delta$  8.02 (d,  $J = 0.8$  Hz, 1H), 7.48 (dd,  $J = 8.4, 0.6$  Hz, 1H), 7.41 (s, 1H), 7.38 (dd,  $J = 8.5, 1.5$  Hz, 1H), 4.65 (s, 2H), 3.35 (s, 3H).

**$^{13}\text{C}$  NMR (100 MHz,  $\text{D}_4$ -methanol):**  $\delta$  140.0, 128.3, 128.2, 125.7, 125.4, 121.8, 114.3, 113.6, 102.8, 67.0, 57.7.

**HRMS (ESI) Calcd.** for  $\text{C}_{11}\text{H}_{10}\text{N}_2\text{O}$ :  $[\text{M}+\text{Na}]^+$ , 209.0691 Found:  $m/z$  209.0688.

### 3-(methoxymethyl)-6-methyl-1H-indole (**4g**):

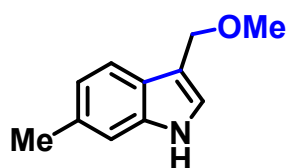

The representative general procedure **E** was followed, using **1'g** (94 mg, 0.3 mmol) for 18 h. Purification by column chromatography (eluted with 12% EtOAc in hexane) furnished **4g** (40 mg, 76% yield) as a sticky brown.  $R_f$  0.51 (20 % EtOAc in hexane).

**$^1\text{H}$  NMR (400 MHz,  $\text{D}_6$ -acetone):**  $\delta$  9.95 (brs, 1H), 7.53 (d,  $J = 8.1$  Hz, 1H), 7.19 (d,  $J = 8.3$  Hz, 2H), 6.89 (d,  $J = 8.1$  Hz, 1H), 4.60 (s, 2H), 3.28 (s, 3H), 2.41 (s, 3H).

**$^{13}\text{C}$  NMR (100 MHz,  $\text{D}_6$ -acetone):**  $\delta$  138.3, 131.7, 126.3, 124.6, 121.6, 119.5, 113.3, 112.1, 67.1, 57.1, 21.8.

**HRMS (ESI) Calcd.** for  $\text{C}_{11}\text{H}_{13}\text{NO}$ :  $[\text{M}-\text{OCH}_3]^+$ , 144.0808. Found:  $m/z$  144.0800.

### 6-chloro-3-(methoxymethyl)-1H-indole (**4h**):<sup>10</sup>

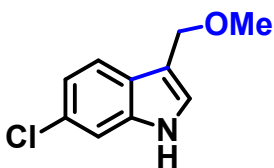

The representative general procedure **E** was followed, using **1h** (100 mg, 0.3 mmol), for 18 h. Purification by column chromatography (eluted with 12% EtOAc in hexane) furnished **4h** (42 mg, 72% yield) as a sticky brown.  $R_f$  0.51 (20 % EtOAc in hexane).

**$^1\text{H}$  NMR (400 MHz,  $\text{D}_6$ -acetone):**  $\delta$  10.30 (brs, 1H), 7.62 (d,  $J = 8.4$  Hz, 1H), 7.44 (d,  $J = 1.8$  Hz, 1H), 7.35 (d,  $J = 2.4$  Hz, 1H), 7.04 (dd,  $J = 8.4, 1.9$  Hz, 1H), 4.60 (s, 2H), 3.28 (s, 3H).

**$^{13}\text{C}$  NMR (100 MHz,  $\text{D}_6$ -acetone):**  $\delta$  138.2, 127.8, 127.1, 126.3, 121.1, 120.3, 113.8, 112.0, 66.8, 57.3.

**HRMS (ESI) Calcd.** for  $\text{C}_{10}\text{H}_{10}\text{ClNO}$ :  $[\text{M}-\text{OCH}_3]^+$ , 164.0262. Found:  $m/z$  164.0260.

### 6-bromo-3-(methoxymethyl)-1H-indole (**4i**):<sup>10</sup>

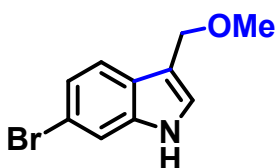

The representative general procedure **E** was followed, using **1i** (113 mg, 0.3 mmol), for 18 h. Purification by column chromatography (eluted with 12% EtOAc in hexane) furnished **4i** (46 mg, 64% yield) as a dark yellow solid.  $R_f$  0.51 (20 % EtOAc in hexane).

**$^1\text{H}$  NMR (400 MHz,  $\text{D}_4$ -methanol):**  $\delta$  7.52 (d,  $J = 1.7$  Hz, 1H), 7.50 (d,  $J = 8.5$  Hz, 1H), 7.22 (s, 1H), 7.14 (dd,  $J = 8.4, 1.7$  Hz, 1H), 4.61 (s, 2H), 3.33 (s, 3H).

**$^{13}\text{C}$  NMR (100 MHz,  $\text{D}_4$ -methanol):**  $\delta$  139.0, 127.4, 126.6, 123.3, 121.2, 116.1, 115.2, 113.2, 67.2, 57.5.

**Melting point:** 78-80 °C.

**HRMS (ESI) Calcd.** for  $\text{C}_{10}\text{H}_{10}\text{BrNO}$ :  $[\text{M}-\text{OCH}_3]^+$ , 207.9756. Found:  $m/z$  207.9770.

## 5. Gram scale synthesis of **3a**:

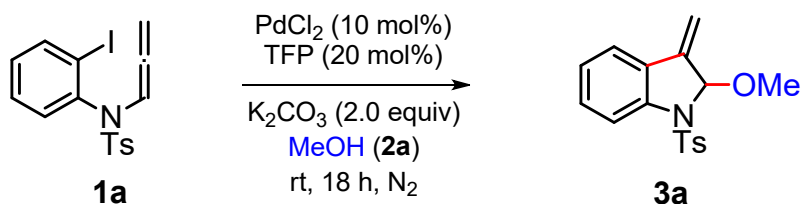

To an oven dried Schlenk tube was charged with allenamide **1a** (1g, 2.43 mmol), palladium chloride (43 mg, 10 mol%), tri(2-furyl)phosphine (118 mg, 20 mol%), and  $\text{K}_2\text{CO}_3$  (671 mg, 2 equiv.), and the vial was sealed with a septum and put under vacuum, followed by flushing with  $\text{N}_2$  gas (3X). Methanol (**2a**) 20 mL was added to the reaction mixture. The reaction was stirred at rt for 18 h, and the solvent was evaporated under reduced pressure. The residue was purified by column chromatography to give **3a** as a brown solid (550 mg, 72% yield).



### Synthesis of 3-benzyl-2-methoxy-1-tosyl-1H-indole (5):

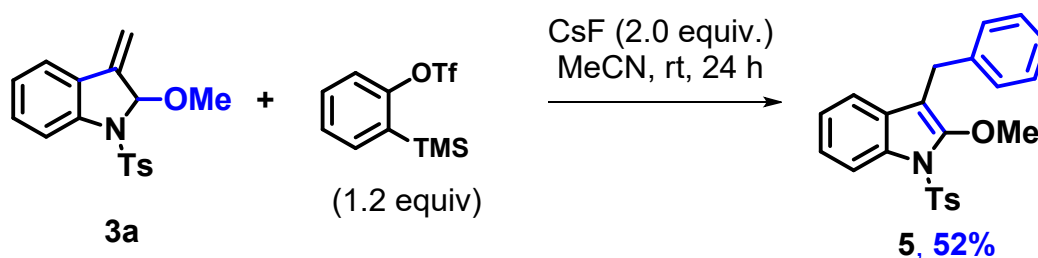

To an oven dried Schlenk tube was charged with **3a** (95 mg, 0.3 mmol, 1 equiv.), 2-(trimethylsilyl)phenyl trifluoromethanesulfonate (1.2 equiv.) and CsF (2 equiv.) in MeCN (3 mL) was added to the reaction mixture. The reaction was stirred at rt for 24 h, and the solvent was evaporated under reduced pressure. Purification by column chromatography (eluted with 5% EtOAc in hexane) furnished **5** (61 mg, 52% yield) as a white solid.  $R_f$  0.72 (20 % EtOAc in hexane).

$^1\text{H NMR}$  (400 MHz,  $\text{CDCl}_3$ ):  $\delta$  8.14 (d,  $J = 8.3$  Hz, 1H), 7.70 (d,  $J = 8.4$  Hz, 2H), 7.25-7.22 (m, 1H), 7.18-7.11 (m, 7H), 7.02-6.99 (m, 2H), 4.01 (s, 3H), 3.89 (s, 2H), 2.35 (s, 3H).

$^{13}\text{C NMR}$  (125 MHz,  $\text{CDCl}_3$ ):  $\delta$  149.5, 144.7, 139.3, 135.2, 132.6, 129.5, 129.4, 128.3, 128.1, 126.9, 126.1, 123.9, 123.8, 118.9, 115.2, 105.8, 64.9, 28.4, 21.6.

**Melting point:** 120-122 °C.

**HRMS** (ESI) Calcd. for  $\text{C}_{23}\text{H}_{21}\text{NO}_3\text{S}$ :  $[\text{M}-\text{H}]^+$ , 392.1320. Found:  $m/z$  392.1312.

### 6. Mechanistic experiments:

a.

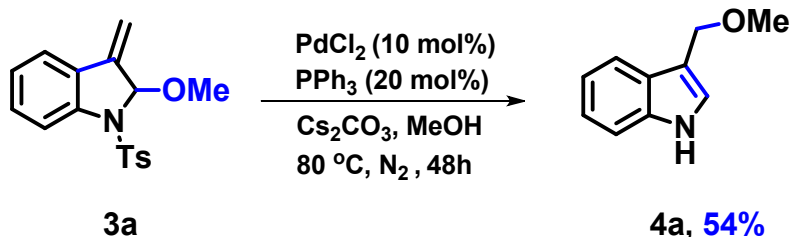

To an oven dried Schlenk tube was charged with **3a** (0.28 mmol, 1 equiv.), palladium chloride (10 mol%), triphenylphosphine (20 mol%), and  $\text{Cs}_2\text{CO}_3$  (2 equiv.), and the vial was sealed with a septum and put under vacuum, followed by flushing with  $\text{N}_2$  gas (3X). Then, the methanol (3 mL) was added to the reaction mixture. The reaction was stirred at rt for 48 h, and the solvent was evaporated under reduced pressure. The residue was purified by column chromatography to give **4a** as a yellow solid (25 mg, 54% yield).

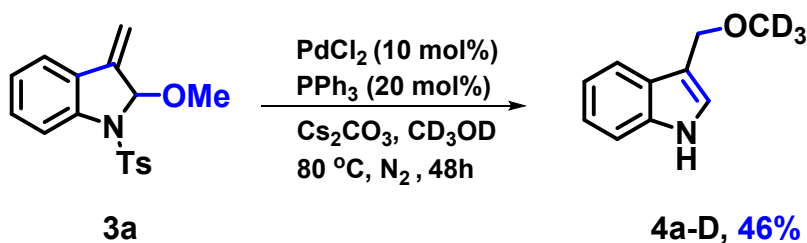

To an oven dried Schlenk tube was charged with **3a** (0.318 mmol, 1 equiv.), palladium chloride (10 mol%), triphenylphosphine (20 mol%), and Cs<sub>2</sub>CO<sub>3</sub> (2 equiv.), and the vial was sealed with a septum and put under vacuum, followed by flushing with N<sub>2</sub> gas (3X). Then, the CD<sub>3</sub>OD (3 mL) was added to the reaction mixture. The reaction was stirred at rt for 48 h, and the solvent was evaporated under reduced pressure. The residue was purified by column chromatography to give **4a-D** as a yellow solid (24 mg, 46% yield).

<sup>1</sup>H NMR (400 MHz, D<sub>6</sub>-acetone): δ 10.14 (brs, 1H), 7.64 (d, *J* = 8.1 Hz, 1H), 7.39 (d, *J* = 8.1 Hz, 1H), 7.30 (d, *J* = 2.2 Hz, 1H), 7.13-7.09 (m, 1H), 7.05-7.01 (m, 1H), 4.61 (s, 2H).

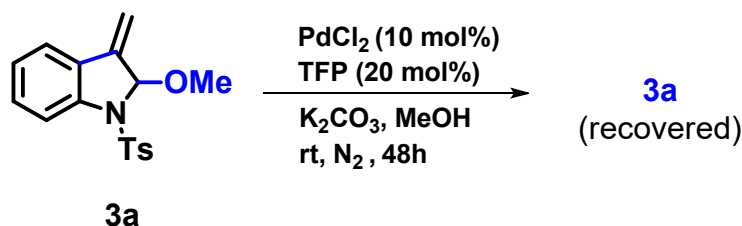

To an oven dried Schlenk tube was charged with **3a** (0.28 mmol, 1 equiv.), palladium chloride (10 mol%), tri(2-furyl)phosphine (20 mol%), and K<sub>2</sub>CO<sub>3</sub> (2 equiv.), and the vial was sealed with a septum and put under vacuum, followed by flushing with N<sub>2</sub> gas (3X). Methanol (**2a**) 3 mL was added to the reaction mixture. The reaction was stirred at rt for 18 h. No reaction was observed and **3a** was recovered.

**b.**

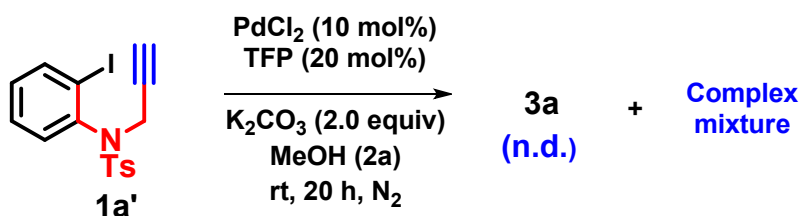

To an oven dried Schlenk tube, was charged with allenamide **1a'** (1 equiv.), palladium chloride (10 mol%), tri(2-furyl)phosphine (20 mol%), and K<sub>2</sub>CO<sub>3</sub> (2 equiv.), and the vial was sealed with a septum and put under vacuum, followed by flushing with N<sub>2</sub> gas (3X). Methanol (**2a**) 3

mL was added to the reaction mixture. The reaction was stirred at rt for 20 h. **3a** was not detected in this reaction, however, we observed a complex reaction mixture.

c.

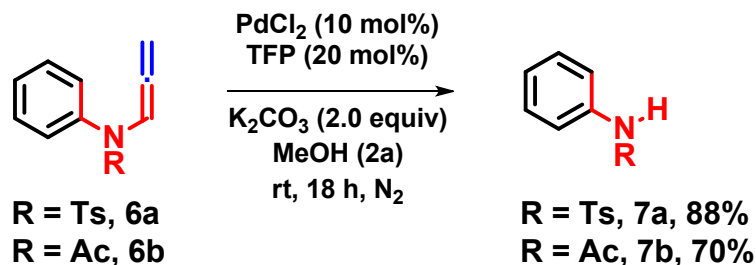

To an oven dried Schlenk tube was charged with allenamide **6** (1 equiv.), palladium chloride (10 mol%), tri(2-furyl)phosphine (20 mol%), and  $\text{K}_2\text{CO}_3$  (2 equiv.), the vial was sealed with a septum and put under vacuum, followed by flushing with  $\text{N}_2$  gas (3X). Methanol (**2a**) 3 mL was added to the reaction mixture. The reaction was stirred at rt for 18 h, and the solvent was evaporated under reduced pressure. The residue was purified by column chromatography on silica gel (PE/EtOAc).

#### 4-methyl-N-phenylbenzenesulfonamide (**7a**):

$^1\text{H NMR}$  (400 MHz,  $\text{CDCl}_3$ ):  $\delta$  7.21 (d,  $J = 7.8$  Hz, 2H), 7.24-7.20 (m, 4H), 7.11-7.04 (m, 4H), 2.36 (s, 3H).

#### N-phenylacetamide (**7b**):

$^1\text{H NMR}$  (400 MHz,  $\text{CDCl}_3$ ):  $\delta$  7.42 (d,  $J = 7.9$  Hz, 2H), 7.23 (t,  $J = 7.8$  Hz, 2H), 7.02 (t,  $J = 7.4$  Hz, 1H), 2.08 (s, 3H).

#### d. Formation of **3'a** and **4a** versus time

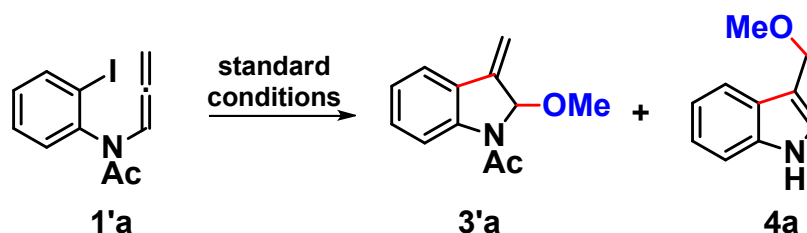

To an oven dried Schlenk tube was charged with allenamide **1'a** (0.034 mmol, 1 equiv.), palladium chloride (10 mol%), tri(2-furyl)phosphine (20 mol%), and  $\text{K}_2\text{CO}_3$  (2 equiv.), the vial was sealed with a septum and put under vacuum, followed by flushing with  $\text{N}_2$  gas (3X). methanol (2a) 1 mL was added to the reaction mixture. The reaction was stirred at rt. The same reaction was run for different time intervals (1-10h) and the  $^1\text{H NMR}$  yield was calculated using 1,3,5-trimethoxybenzene as an internal standard.

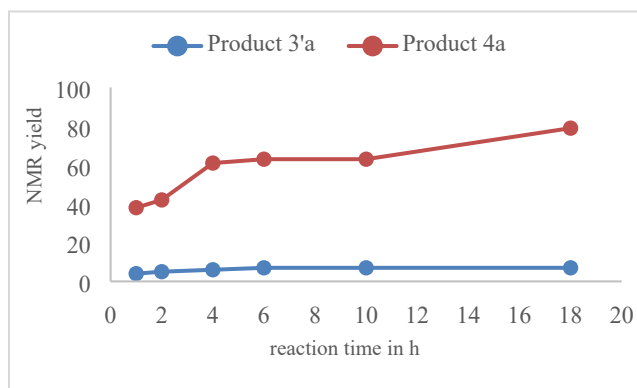

| Entry | Time | 3'a (NMR Yield %) | 4a (NMR Yield %) |
|-------|------|-------------------|------------------|
| 1.    | 1h   | 4                 | 38               |
| 2.    | 2h   | 5                 | 42               |
| 3.    | 4h   | 6                 | 61               |
| 4.    | 6h   | 7                 | 63               |
| 5.    | 10h  | 7                 | 63               |
| 6.    | 18h  | 7                 | 79               |

## 7. Crystal Structure

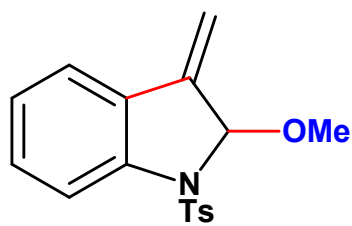

**3a**  
CCDC 2168612

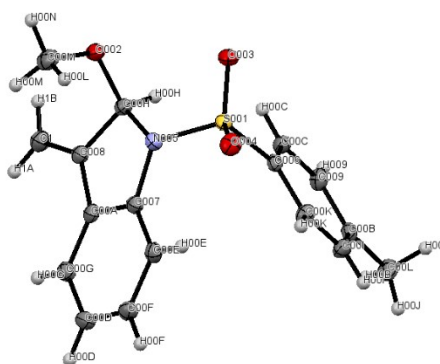

|                |                                    |         |                                                   |
|----------------|------------------------------------|---------|---------------------------------------------------|
| Compound       | <b>3a</b>                          |         |                                                   |
| CCDC           | 2168612                            | Formula | C <sub>17</sub> H <sub>17</sub> NO <sub>3</sub> S |
| M <sub>w</sub> | 315.38                             |         |                                                   |
| crystal system | Monoclinic                         |         |                                                   |
| space group    | <i>P</i> 2 <sub>1</sub> / <i>c</i> |         |                                                   |

|                                         |                       |                           |            |
|-----------------------------------------|-----------------------|---------------------------|------------|
| T [K]                                   | 296                   |                           |            |
| a [Å]                                   | 9.6139(10)            | $\alpha$ [°]              | 90         |
| b [Å]                                   | 14.7059(13)           | $\beta$ [°]               | 100.759(3) |
| c [Å]                                   | 10.8929(10)           | $\gamma$ [°]              | 90         |
| Z                                       | 4                     | V [Å <sup>3</sup> ]       | 1513.0(2)  |
| D <sub>calc</sub> [g cm <sup>-3</sup> ] | 1.385                 | $\mu$ [mm <sup>-1</sup> ] | 0.226      |
| total reflns                            | 3797                  | unique reflns             | 3789       |
| observed reflns                         | 3241                  |                           |            |
| $R_1[I > 2\sigma(I)]$                   | 0.0362                |                           |            |
| $wR_2$ [all]                            | 0.0927                |                           |            |
| GOF                                     | 0.994                 |                           |            |
| Diffractionmeter                        | Bruker APEX-II<br>CCD |                           |            |

## 8. References

1. Zhu, X.; Li, R.; Yao, H.; Lin, A. *Org. Lett.* **2021**, *23*, 4630–4634.
2. Wang, D-C.; Cheng, P-P.; Yang, T-T.; Wu, P-P.; Qu, G-R.; Guo, H-M. *Org. Lett.* **2021**, *23*, 7865–7872.
3. Deng, G.; Li, M.; Yu, K.; Liu, C.; Liu, Z.; Duan, S.; Chen, W.; Yang, X.; Zhang, H.; Walsh, P.J. *Angew. Chem. Int. Ed.* **2019**, *58*, 2826–2830.
4. Chen, X.; Qiu, G.; Liu, R.; Chen, D.; Chen, Z. *Org. Chem. Front.* **2020**, *7*, 890–895.
5. Guo, S.; Chen, J.; Yi, M.; Dong, L.; Lin, A.; Yao, H. *Org. Chem. Front.* **2021**, *8*, 1783–1788.
6. Grigg, R.; Sridharan, V.; Xu, L-H. *J. Chem. Soc., Chem. Commun.* **1995**, 1903-1904.
7. He, S.; Hsung, R. P.; Presser, W. R.; Ma, Z-X.; Haugen, B. J. *Org. Lett.* **2014**, *16*, 2180–2183.
8. Yang, X.; Toste, F. D. *Chem. Sci.* **2016**, *7*, 2653-2656.
9. Xie, Z.; Wu, P.; Cai, L.; Tong, X. *Tetrahedron Lett.* **2014**, *55*, 2160–2162.
10. Pi, C.; Yin, X.; Cui, X.; Ma, Y.; Wu, Y. *Org. Lett.* **2019**, *21*, 2081–2084.

11. Caiuby, C. A. D.; Ali, A.; Santana, V. T.; Lucas, F. W.; Santos, M. S.; Corrêa, A. G.; Nascimento, O. R.; Jianga, H.; Paixão, M. W. *RSC Adv.* **2018**, *8*, 12879–12886.
12. Tasker, S. Z.; Jamison, T. F. *J. Am. Chem. Soc.* **2015**, *137*, 9531–9534.
13. Garkhedkar, A. M.; Gore, B. S.; Hu, W-P.; Wang, J-J. *Org. Lett.* **2020**, *22*, 3531–3536.
14. Deposition number 2168612 contain the supplementary crystallographic data for this paper. These data are provided free of charge by the joint Cambridge Crystallographic Data Centre.

## 9.NMR Spectra

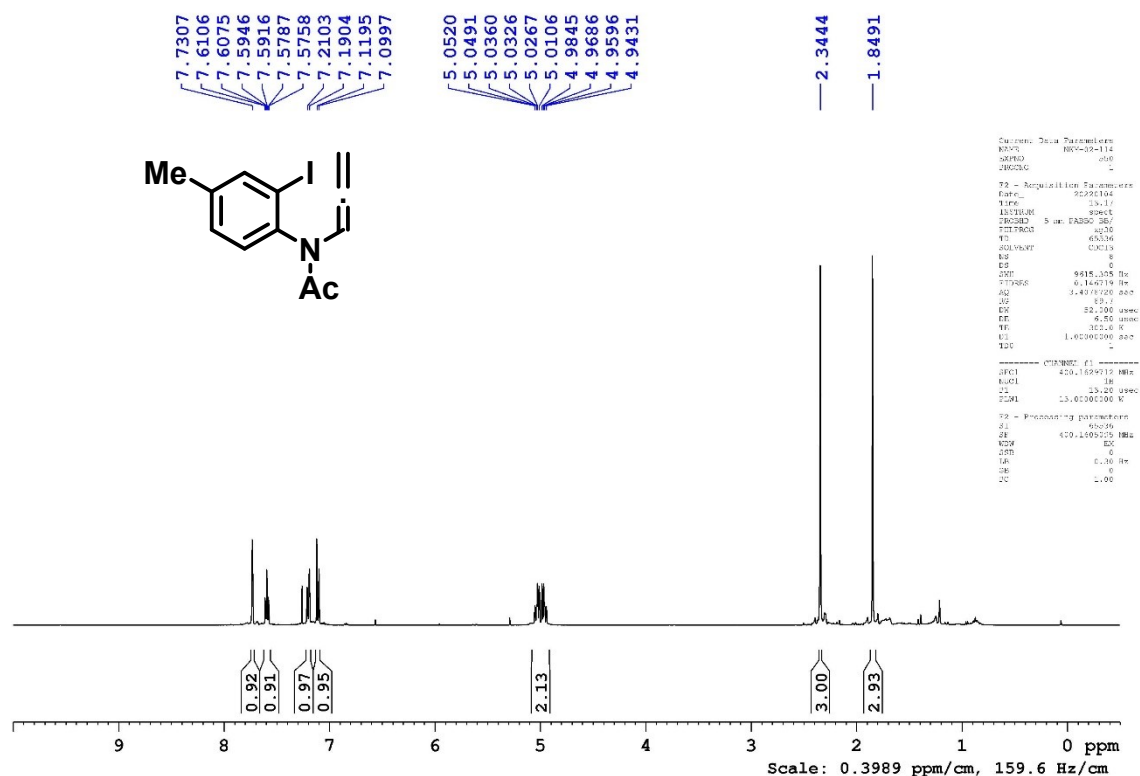

Figure S-1: <sup>1</sup>H NMR (400 MHz, CDCl<sub>3</sub>) spectrum of compound **1'b**

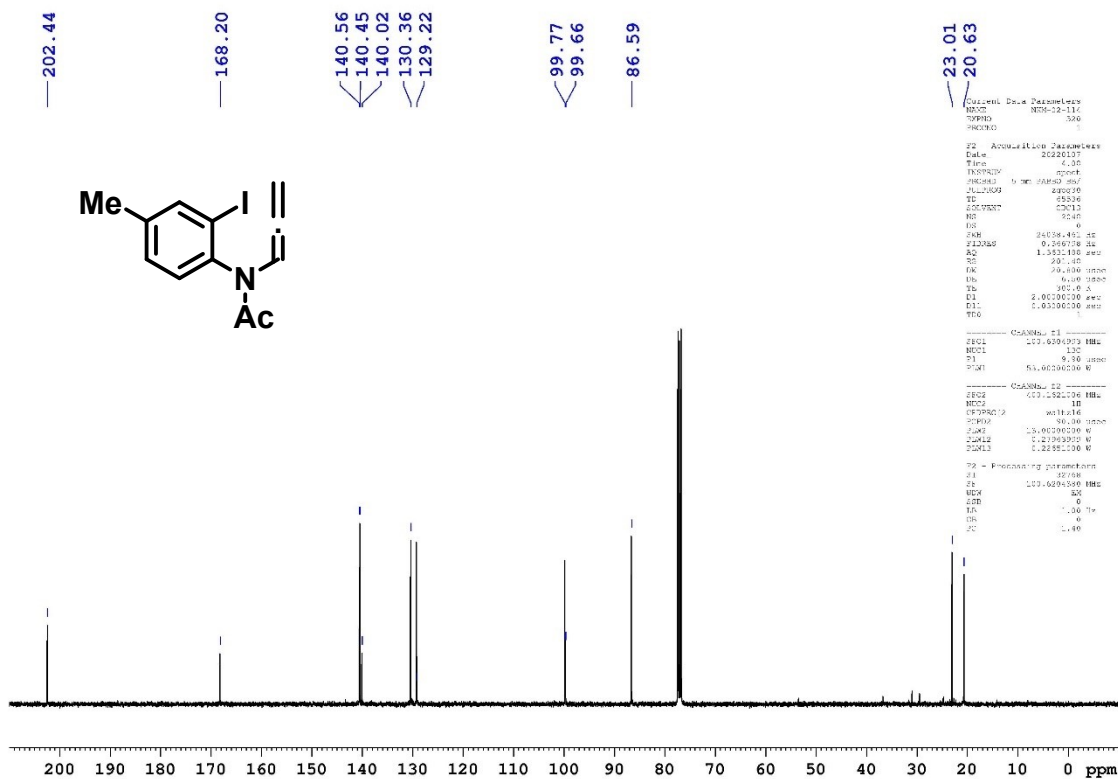

Figure S-2: <sup>13</sup>C NMR (100 MHz, CDCl<sub>3</sub>) spectrum of compound 1'b

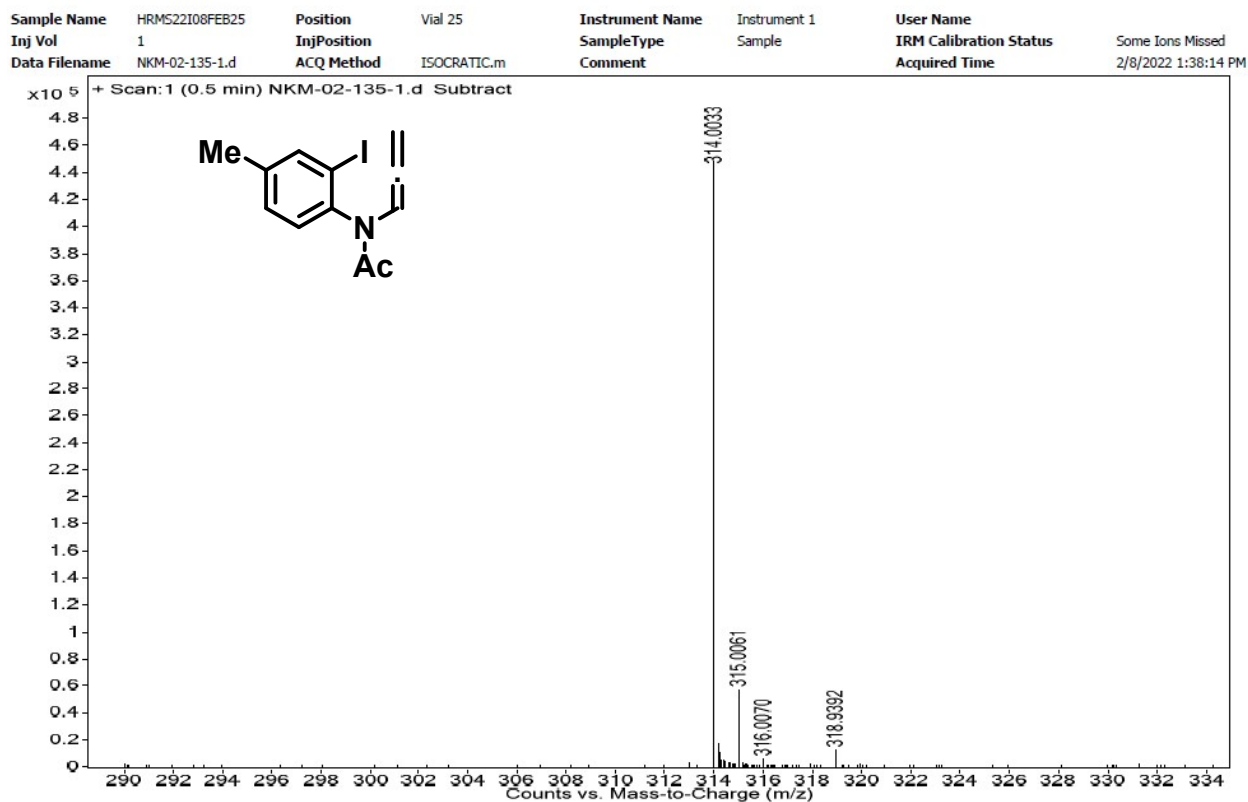

Figure S-3: HRMS spectrum of compound 1'b

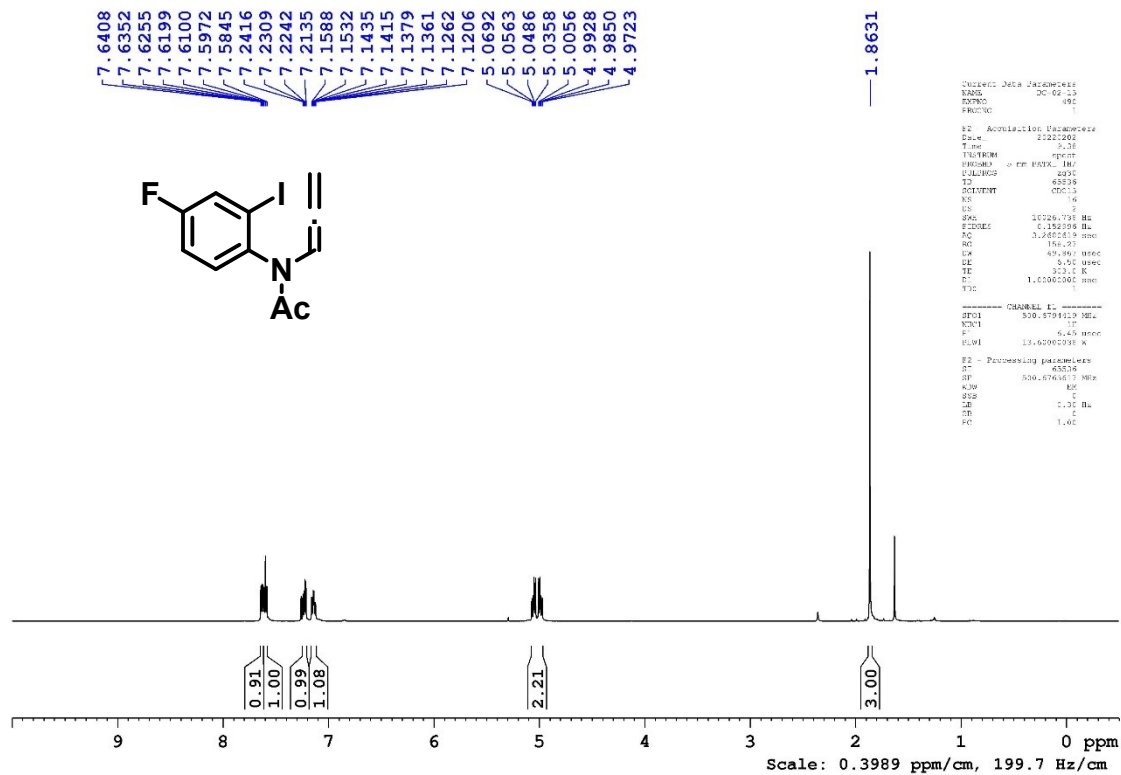

Figure S-4: <sup>1</sup>H NMR (500 MHz, CDCl<sub>3</sub>) spectrum of compound 1c

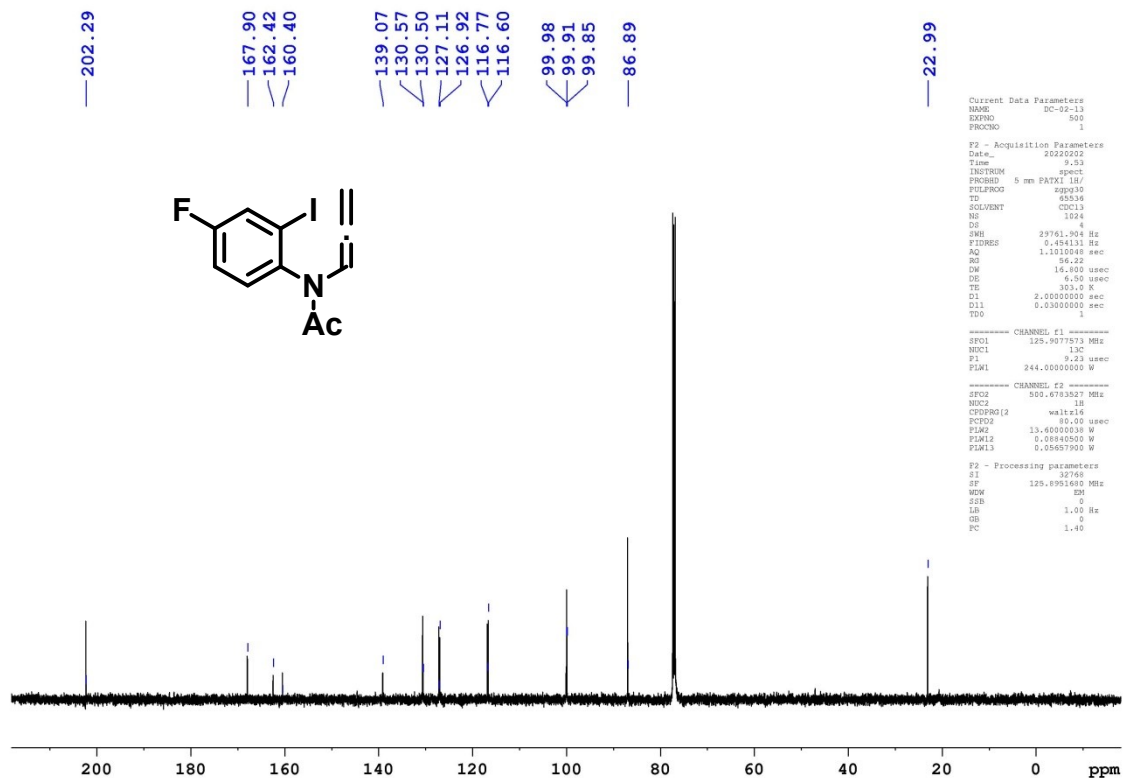



Figure S-5: <sup>13</sup>C NMR (125 MHz, CDCl<sub>3</sub>) spectrum of compound 1'c

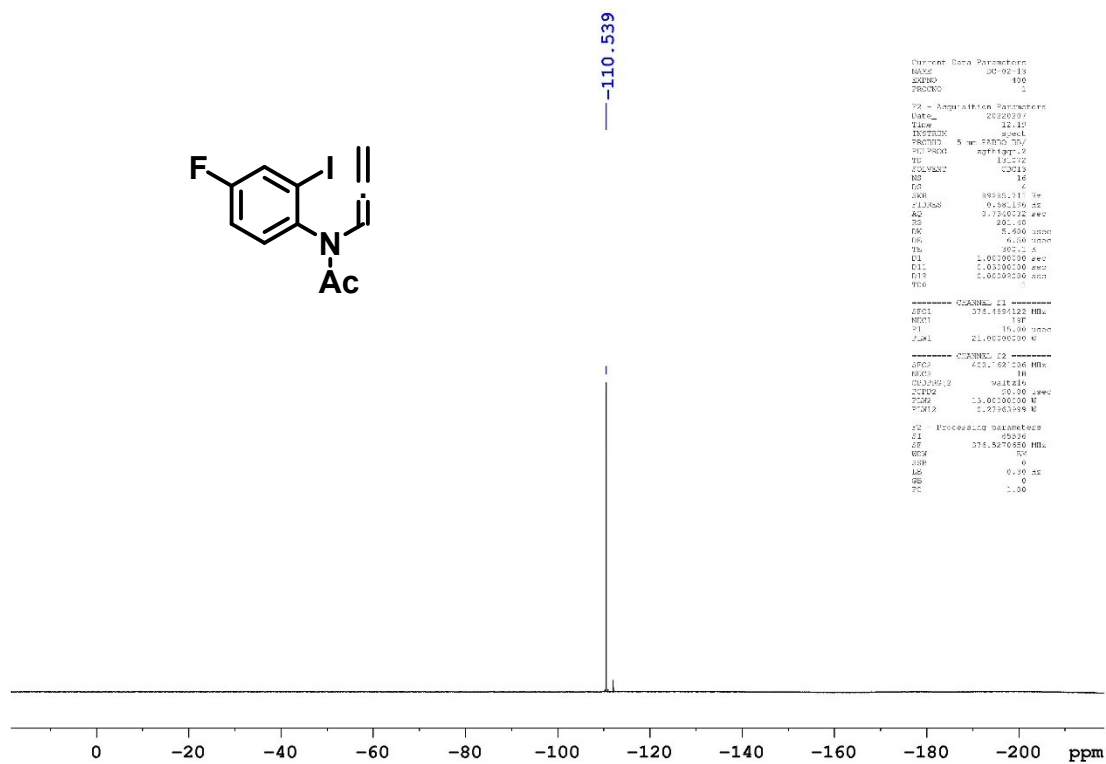

Figure S-6: <sup>19</sup>F NMR (376 MHz, CDCl<sub>3</sub>) spectrum of compound 1'c

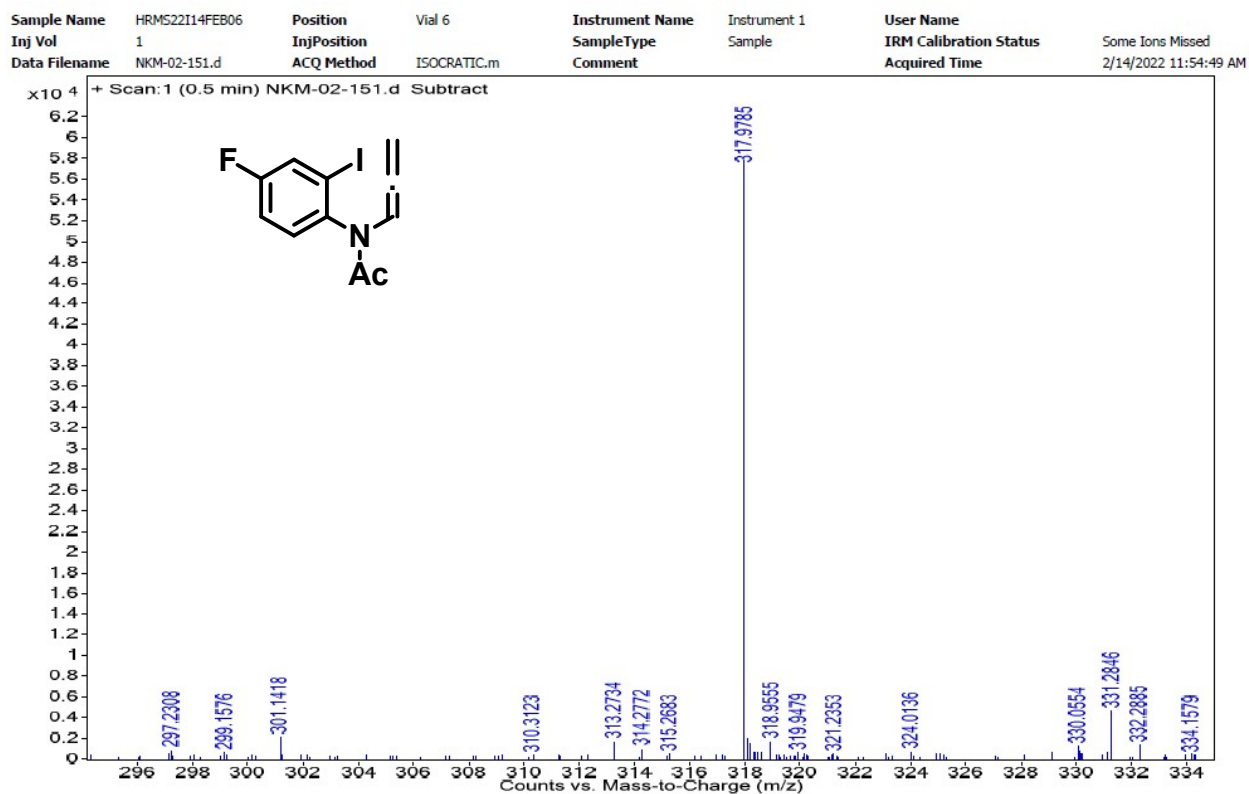

Figure S-7: HRMS spectrum of compound 1'c

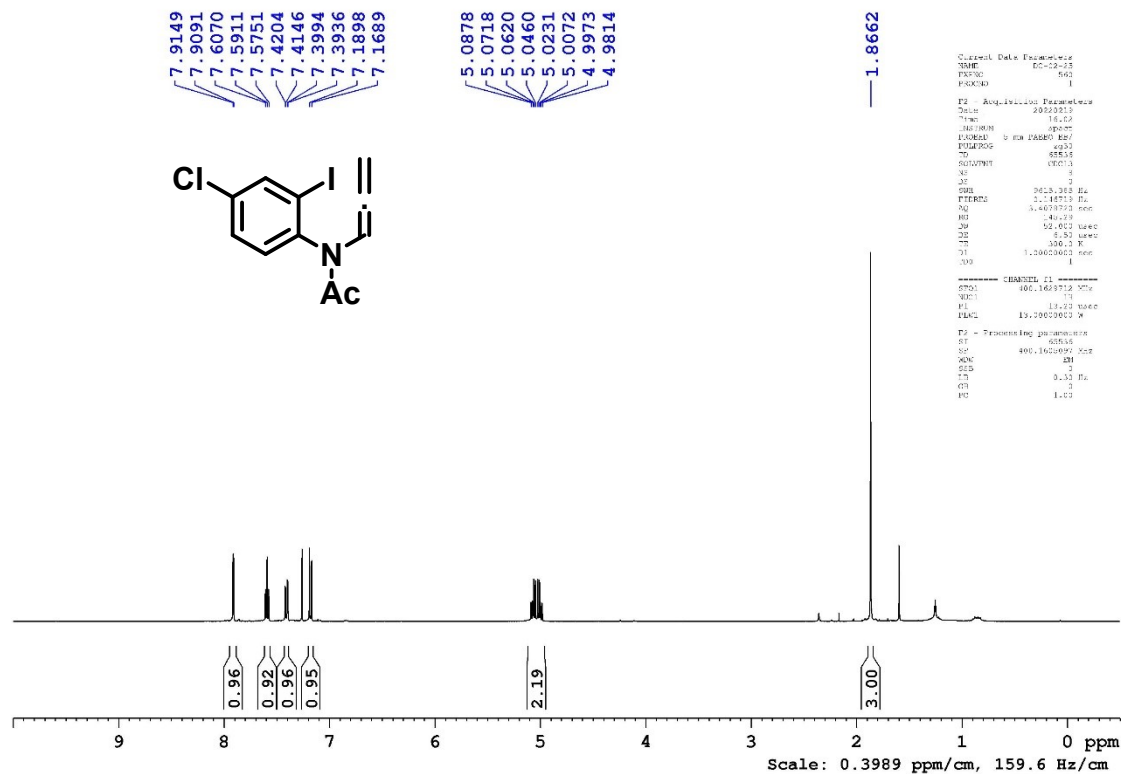

Figure S-8: <sup>1</sup>H NMR (400 MHz, CDCl<sub>3</sub>) spectrum of compound **1'd**

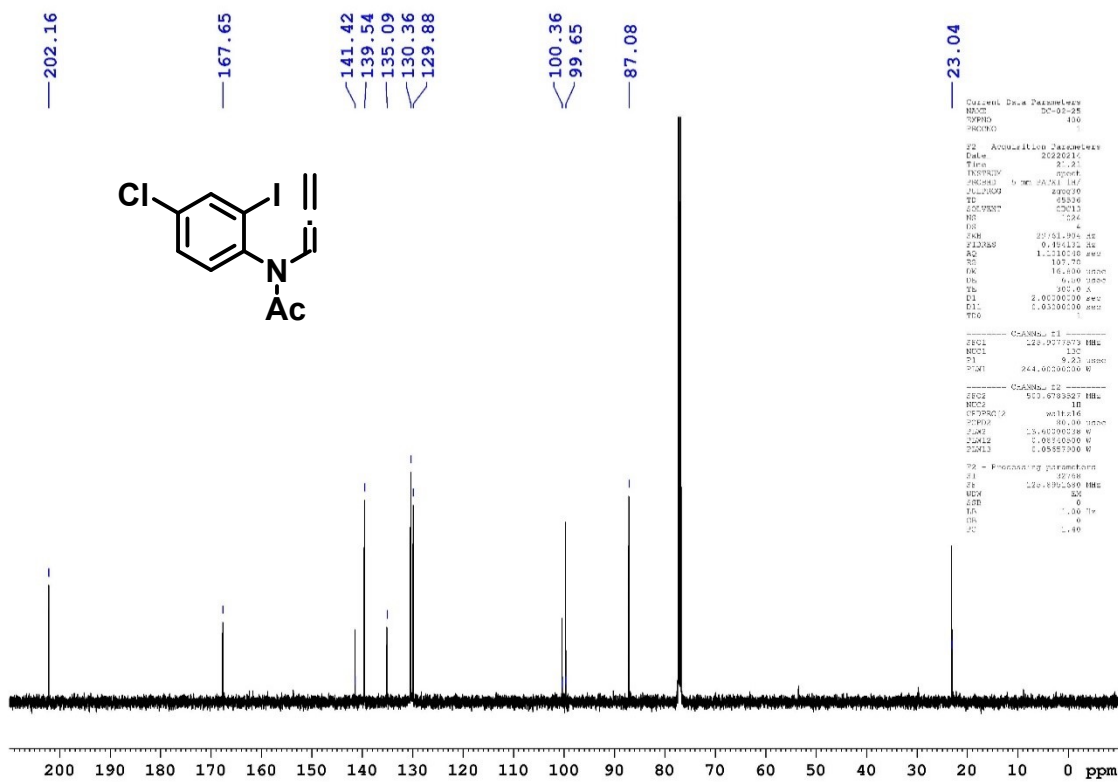

Figure S-9: <sup>13</sup>C NMR (125 MHz, CDCl<sub>3</sub>) spectrum of compound **1'd**

| Sample Name   | HRM522I15FEB23 | Position    | Vial 23     | Instrument Name | Instrument 1 | User Name              |                       |
|---------------|----------------|-------------|-------------|-----------------|--------------|------------------------|-----------------------|
| Inj Vol       | 1              | InjPosition |             | SampleType      | Sample       | IRM Calibration Status | Some Ions Missed      |
| Data Filename | DC-01-296.d    | ACQ Method  | ISOCRATIC.m | Comment         |              | Acquired Time          | 2/15/2022 12:26:29 PM |

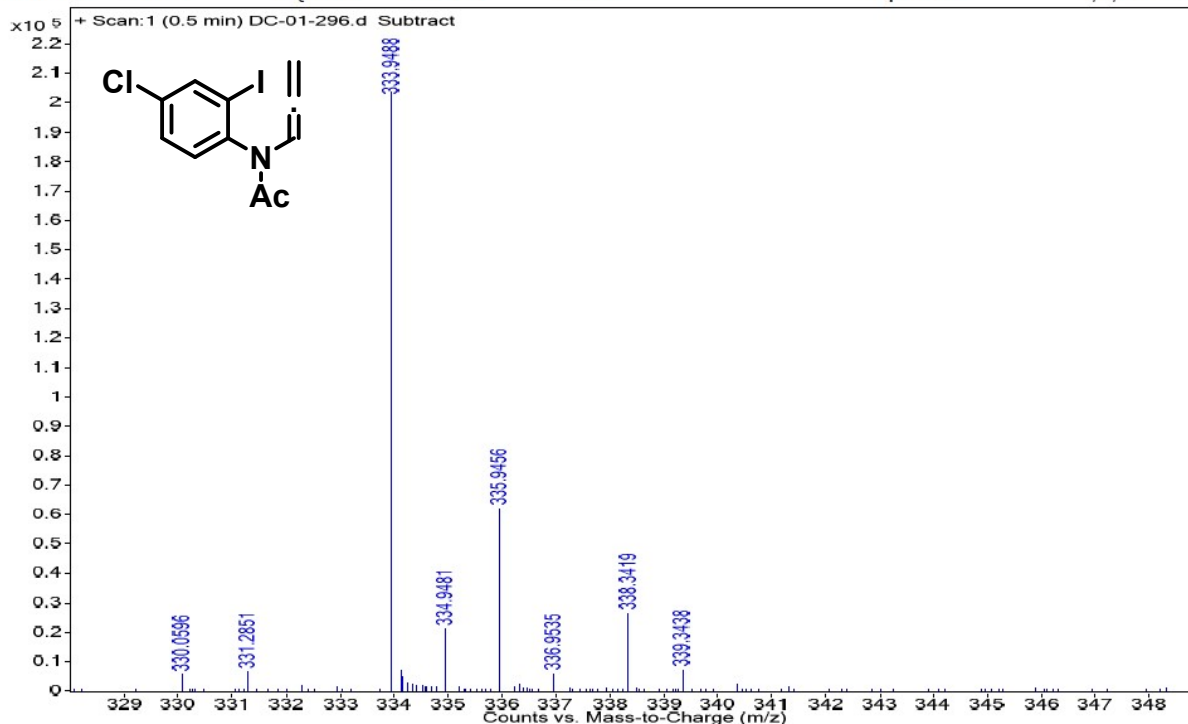

Figure S-10: HRMS spectrum of compound 1'd

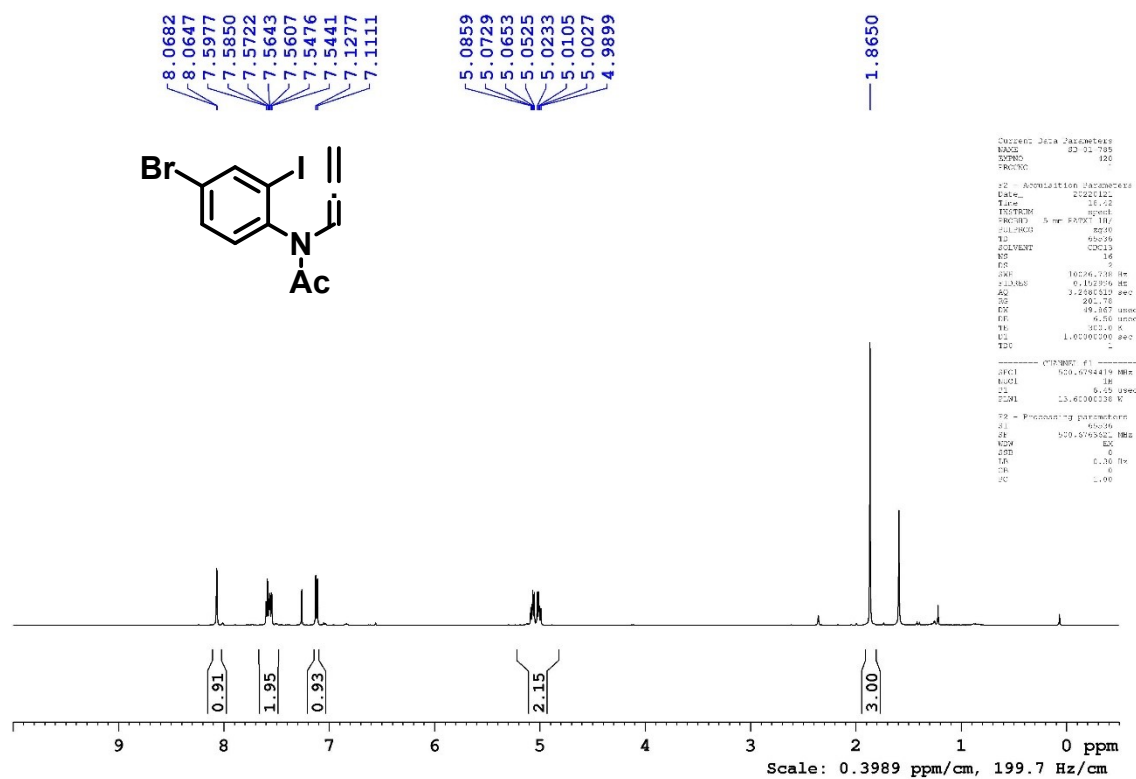

Figure S-11: <sup>1</sup>H NMR (500 MHz, CDCl<sub>3</sub>) spectrum of compound 1'e

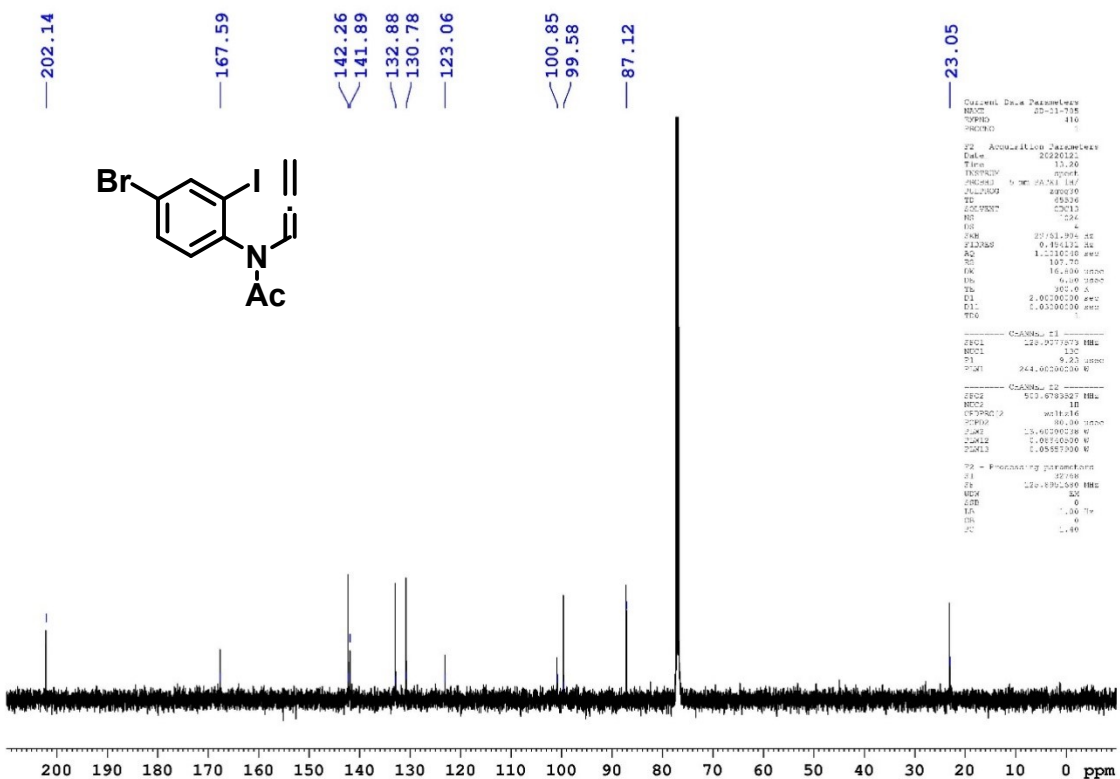

Figure S-12: <sup>13</sup>C NMR (125 MHz, CDCl<sub>3</sub>) spectrum of compound 1'e

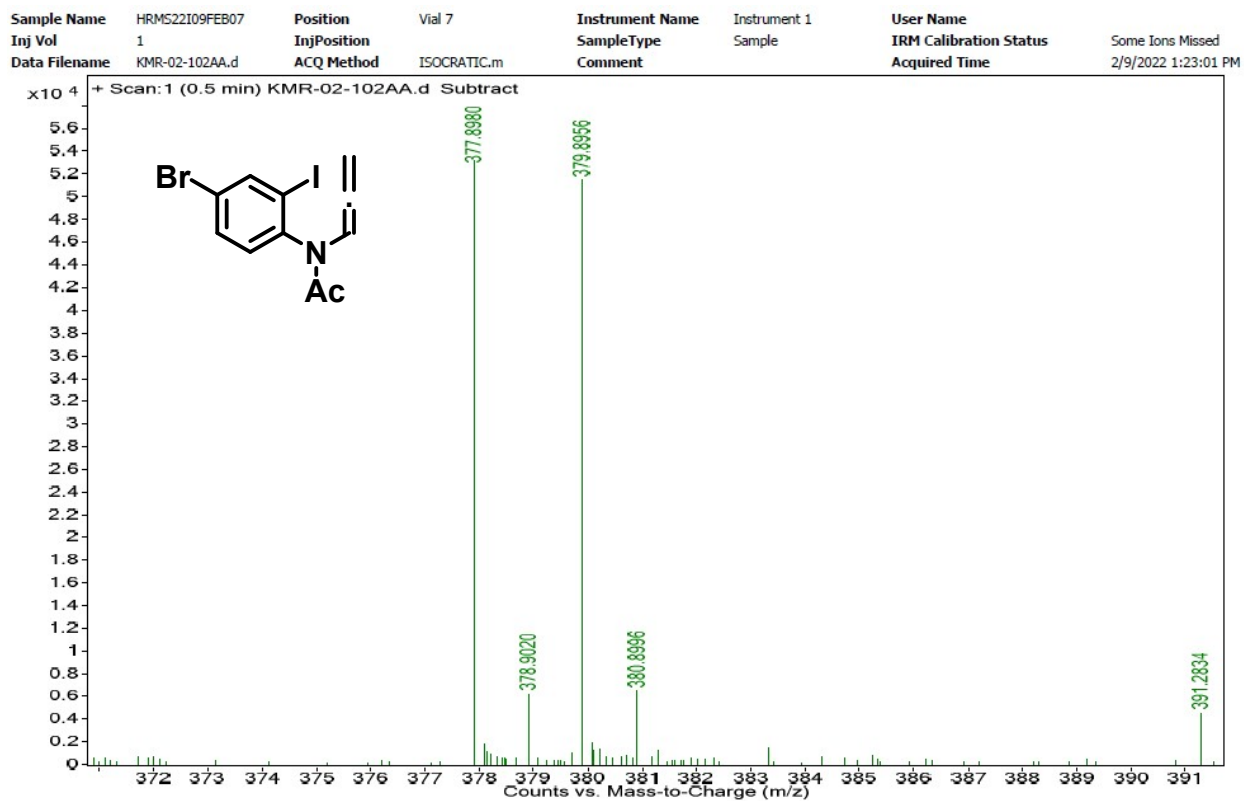

Figure S-13: HRMS spectrum of compound 1'e

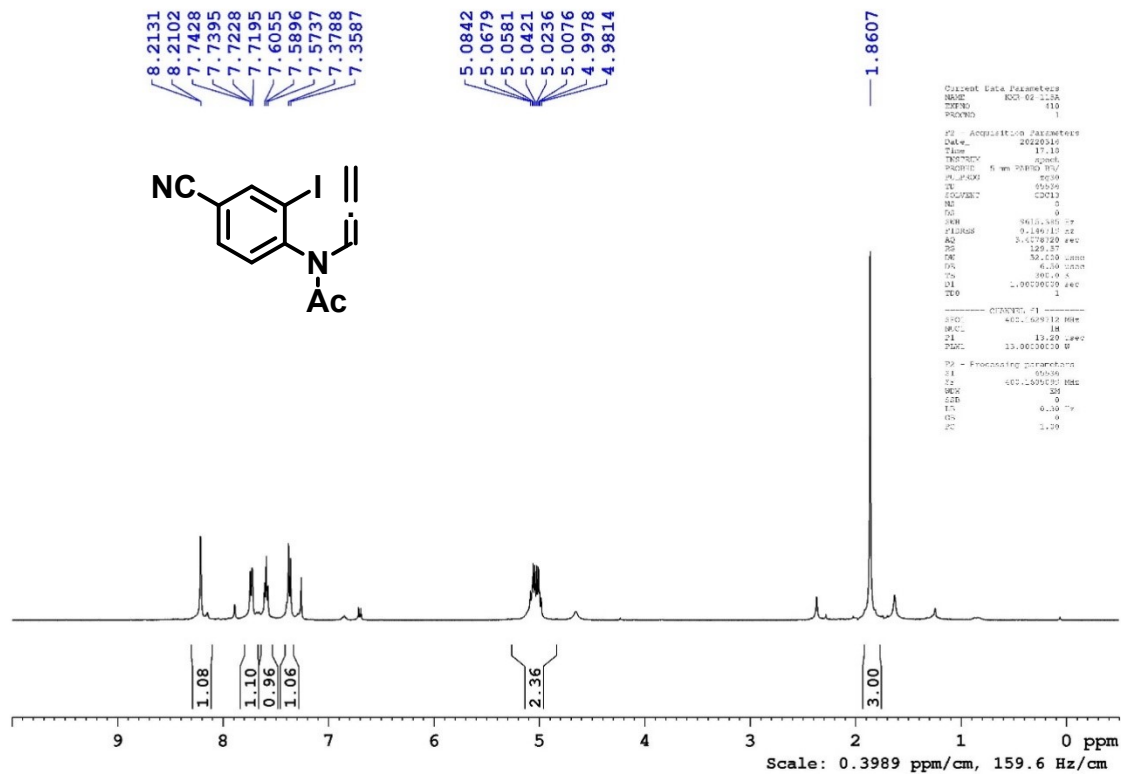

Figure S-14: <sup>1</sup>H NMR (400 MHz, CDCl<sub>3</sub>) spectrum of compound 1'f

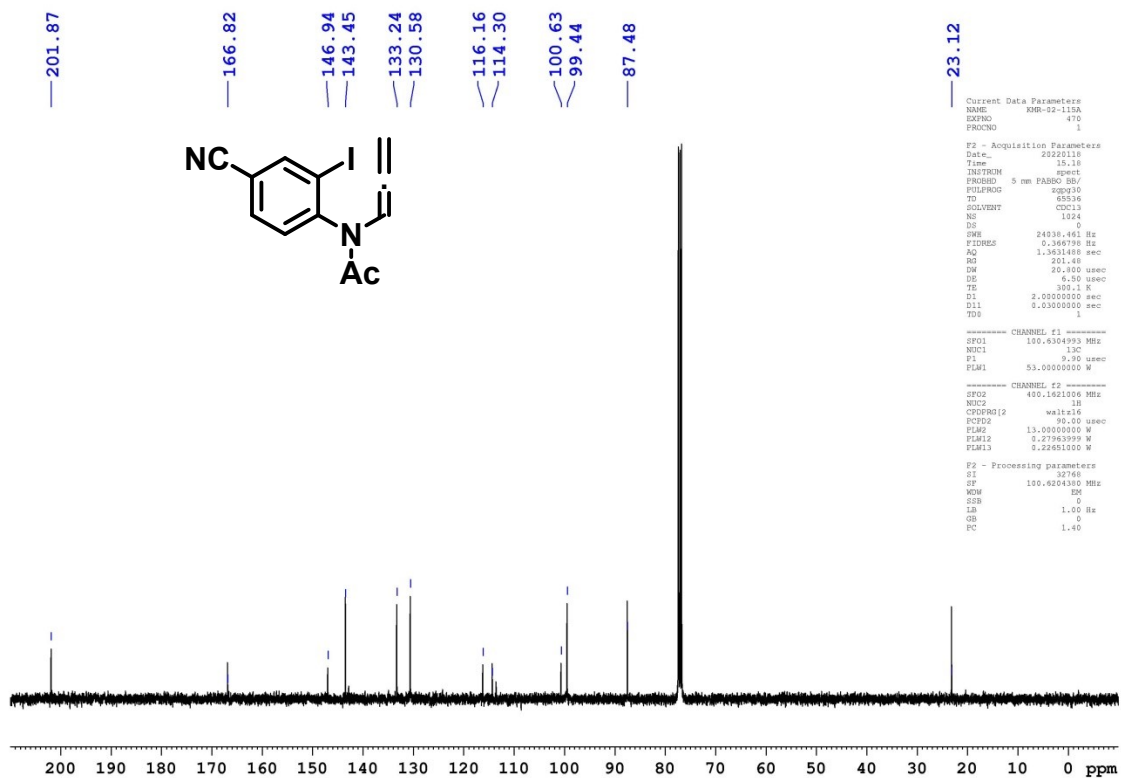

Figure S-15:  $^{13}\text{C}$  NMR (100 MHz,  $\text{CDCl}_3$ ) spectrum of compound 1'f

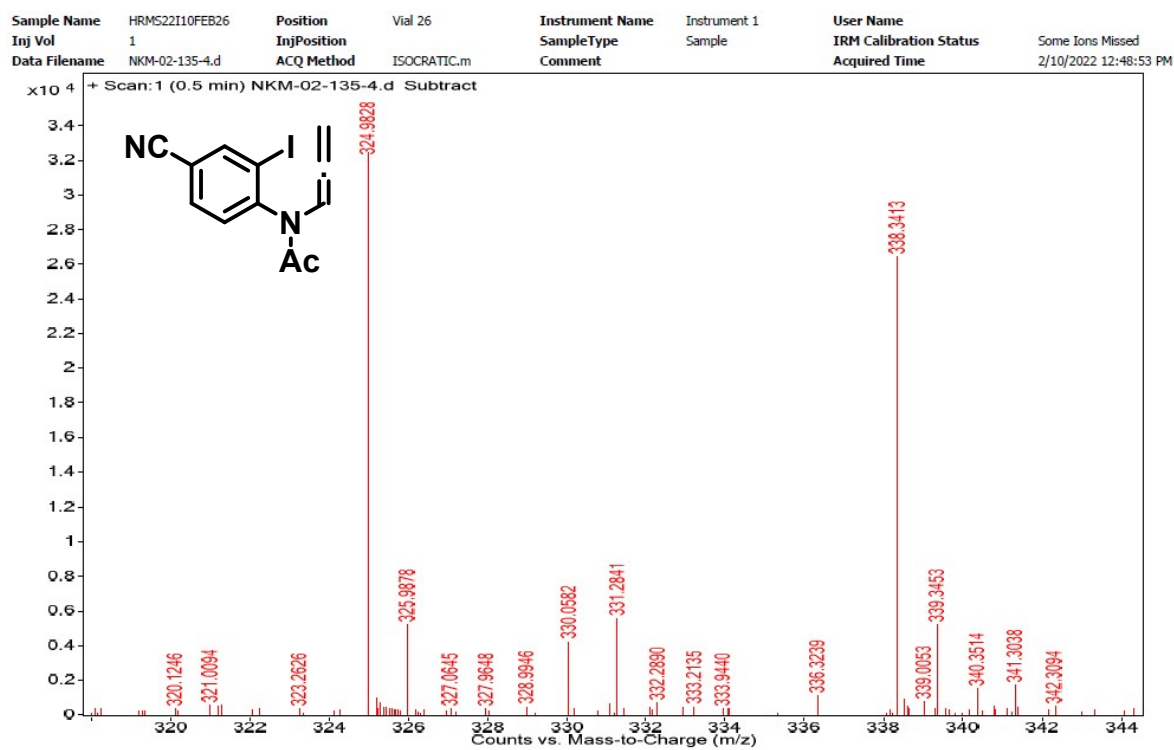

Figure S-16: HRMS spectrum of compound 1'f

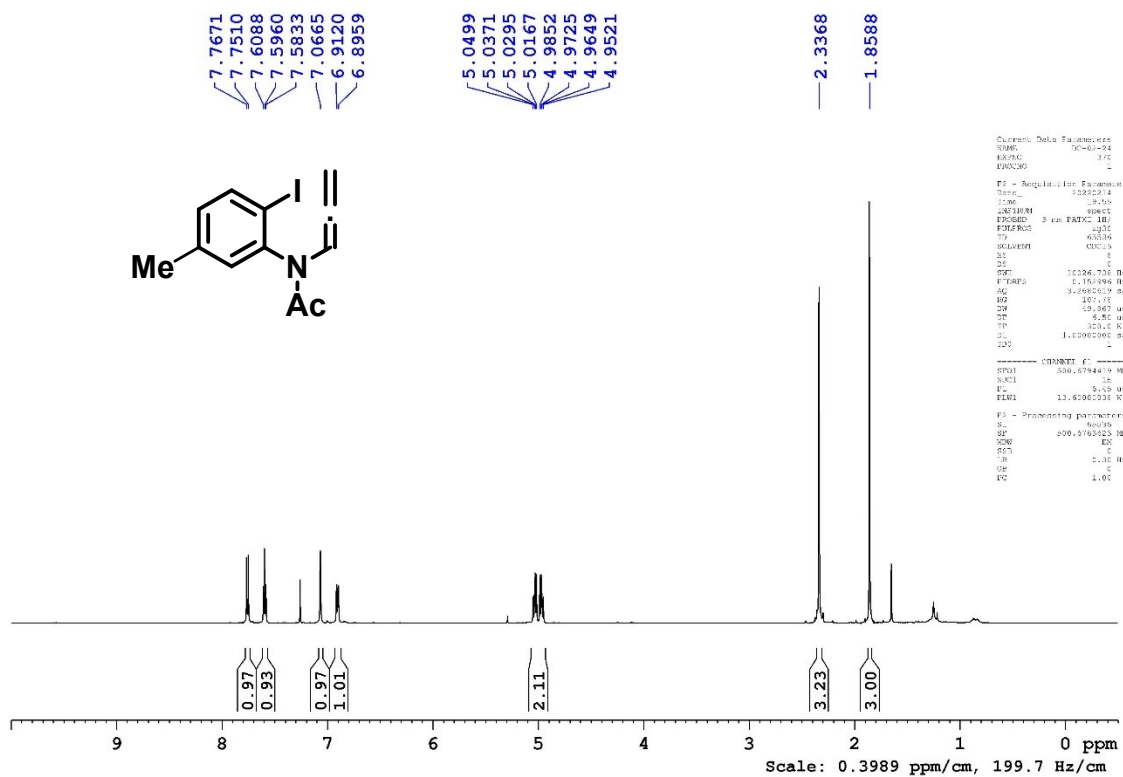

Figure S-17:  $^1\text{H}$  NMR (500 MHz,  $\text{CDCl}_3$ ) spectrum of compound 1'g

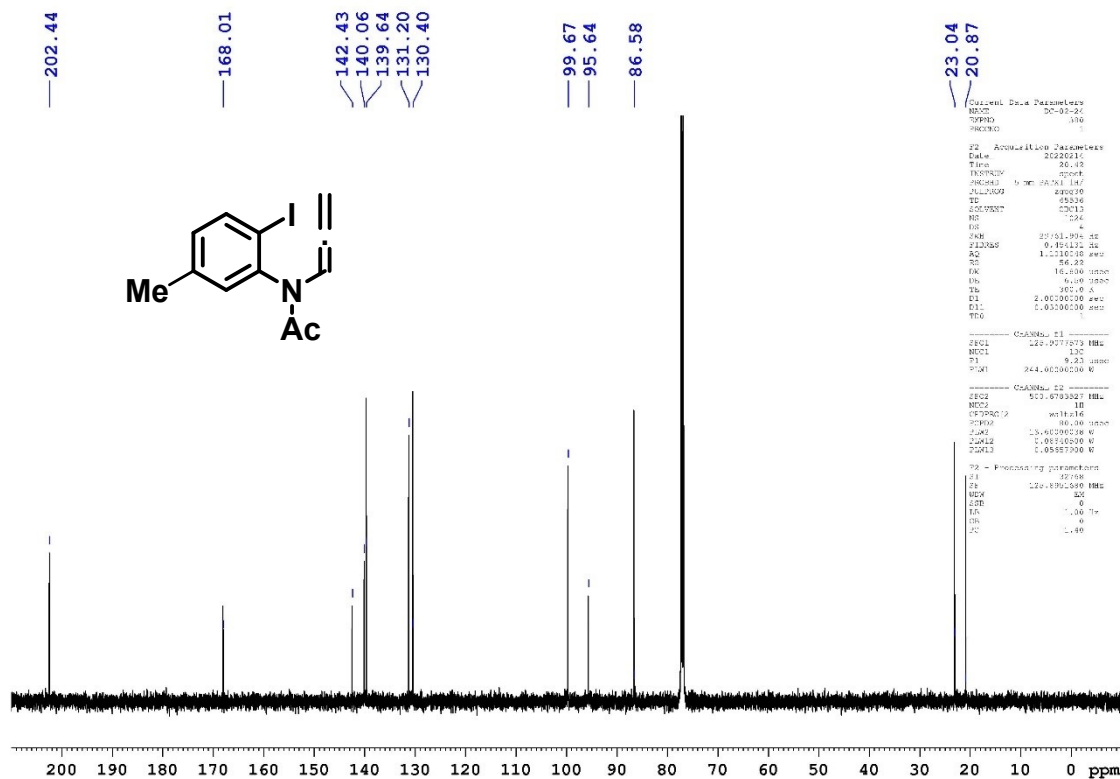

Figure S-18:  $^{13}\text{C}$  NMR (125 MHz,  $\text{CDCl}_3$ ) spectrum of compound 1'g

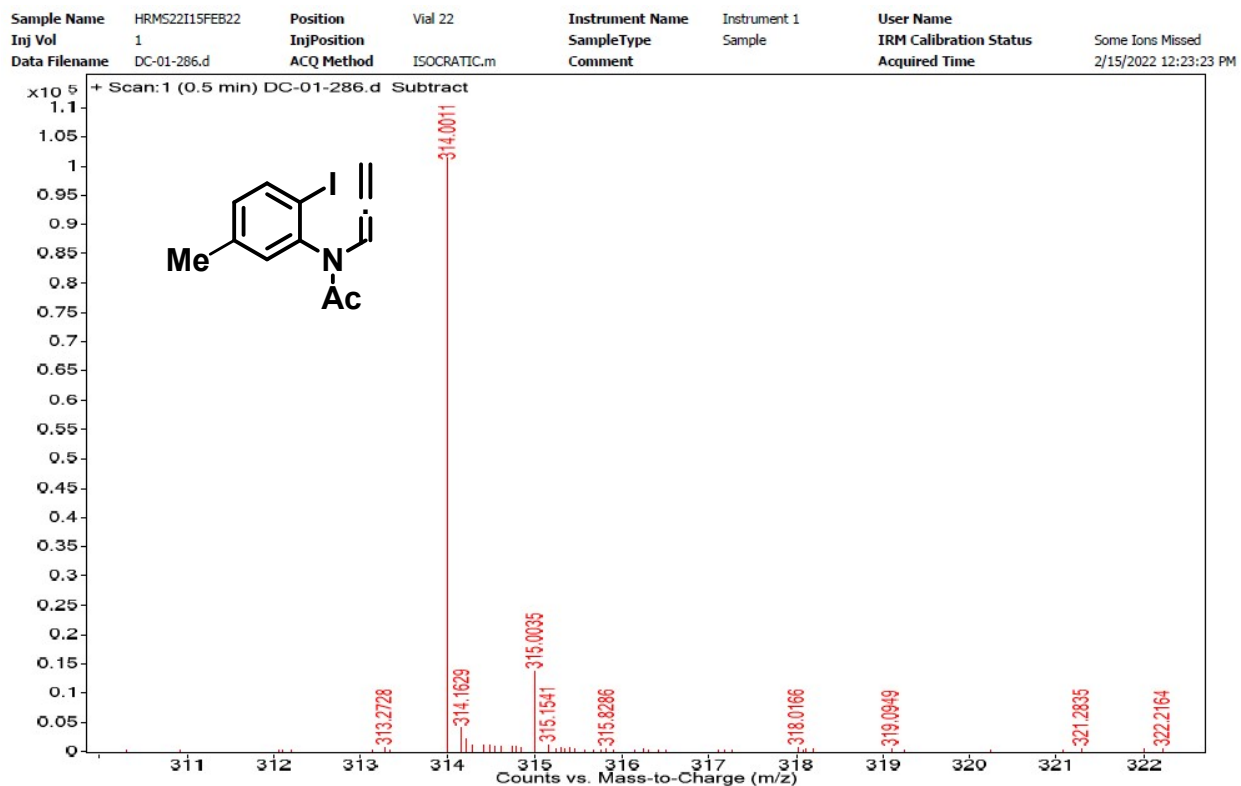

Figure S-19: HRMS spectrum of compound 1'g

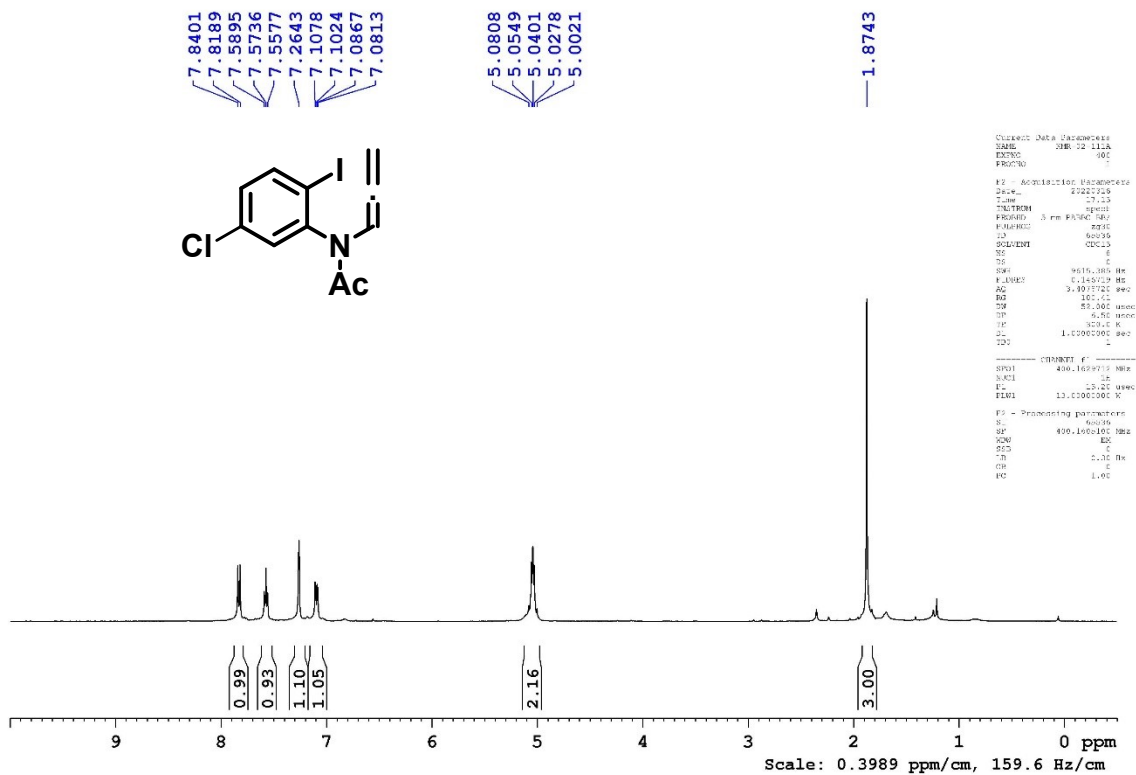

Figure S-20: <sup>1</sup>H NMR (400 MHz, CDCl<sub>3</sub>) spectrum of compound **1'h**

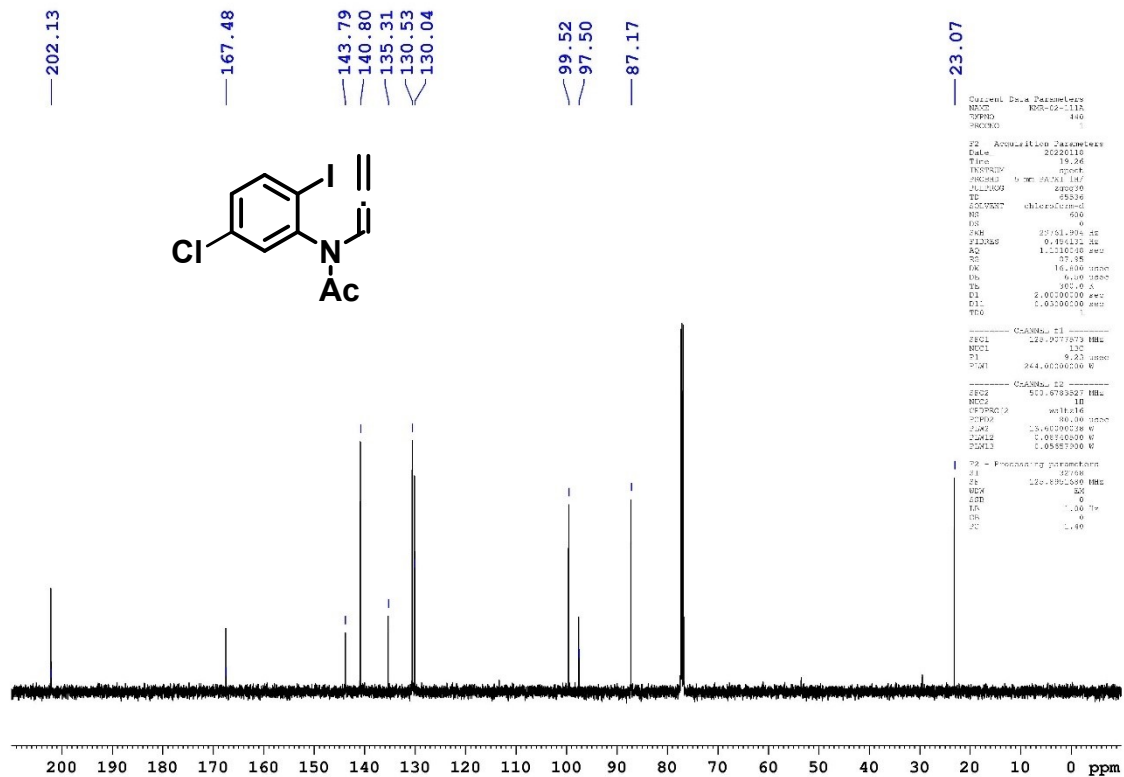

Figure S-21: <sup>13</sup>C NMR (125 MHz, CDCl<sub>3</sub>) spectrum of compound **1'h**



|               |                |             |             |                 |              |                        |                       |
|---------------|----------------|-------------|-------------|-----------------|--------------|------------------------|-----------------------|
| Sample Name   | HRMS22I10FEB25 | Position    | Vial 25     | Instrument Name | Instrument 1 | User Name              |                       |
| Inj Vol       | 1              | InjPosition |             | SampleType      | Sample       | IRM Calibration Status | Some Ions Missed      |
| Data Filename | NKM-02-135-3.d | ACQ Method  | ISOCRATIC.m | Comment         |              | Acquired Time          | 2/10/2022 12:45:42 PM |

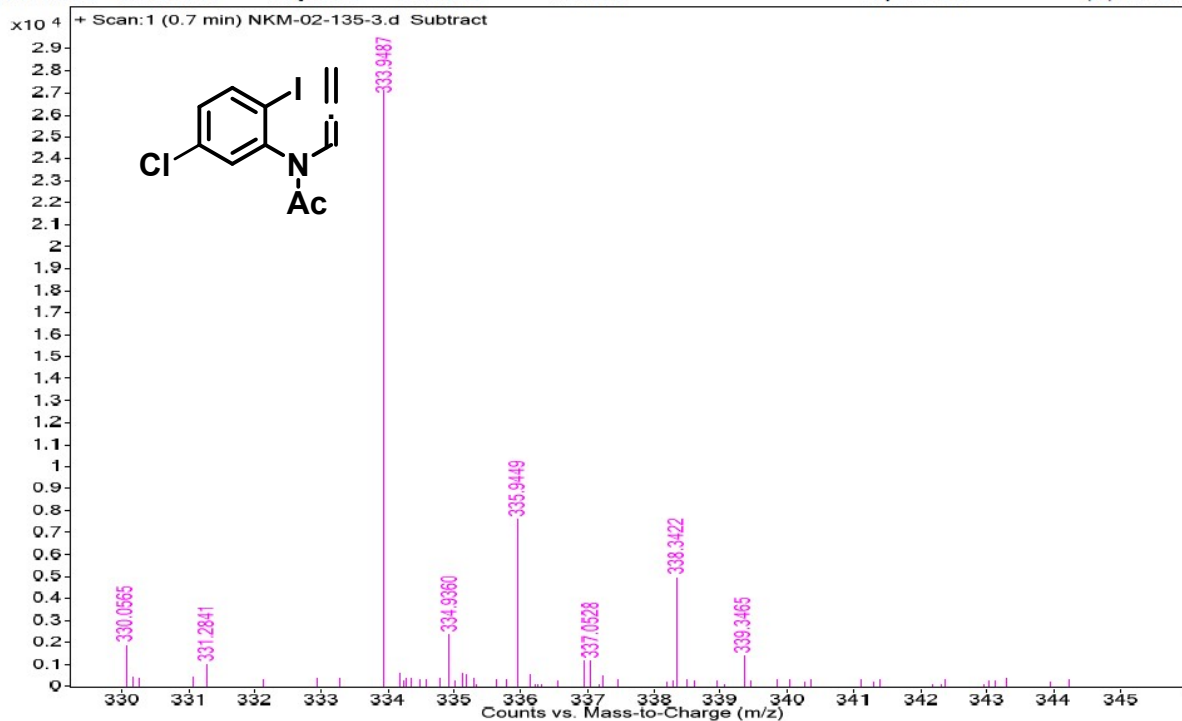

Figure S-22: HRMS spectrum of compound 1'h

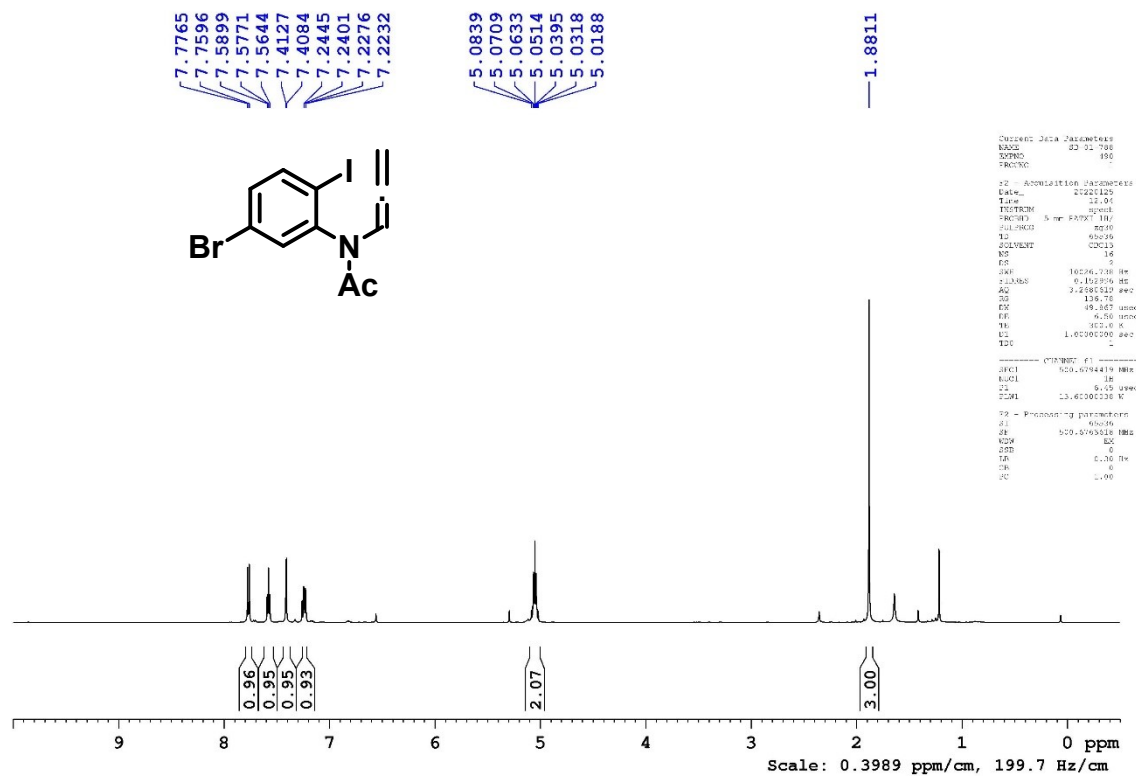

Figure S-23:  $^1\text{H}$  NMR (500 MHz,  $\text{CDCl}_3$ ) spectrum of compound 1'i

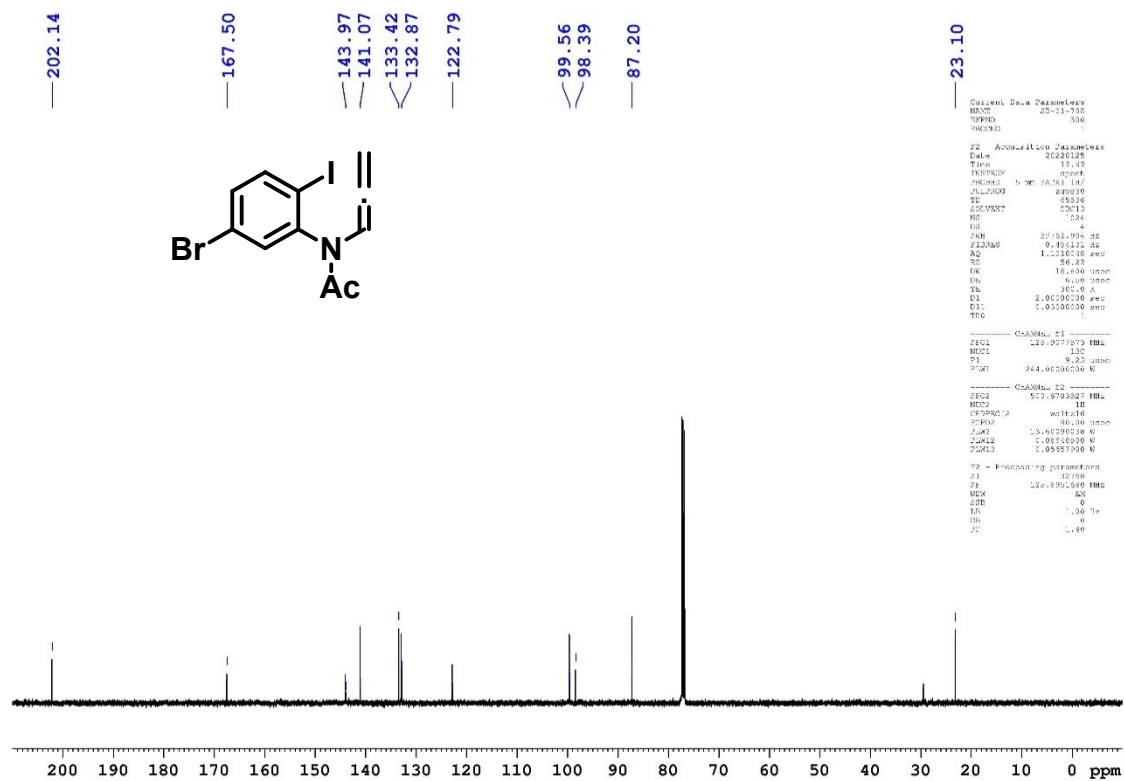

Figure S-24: <sup>13</sup>C NMR (125 MHz, CDCl<sub>3</sub>) spectrum of compound 1'i

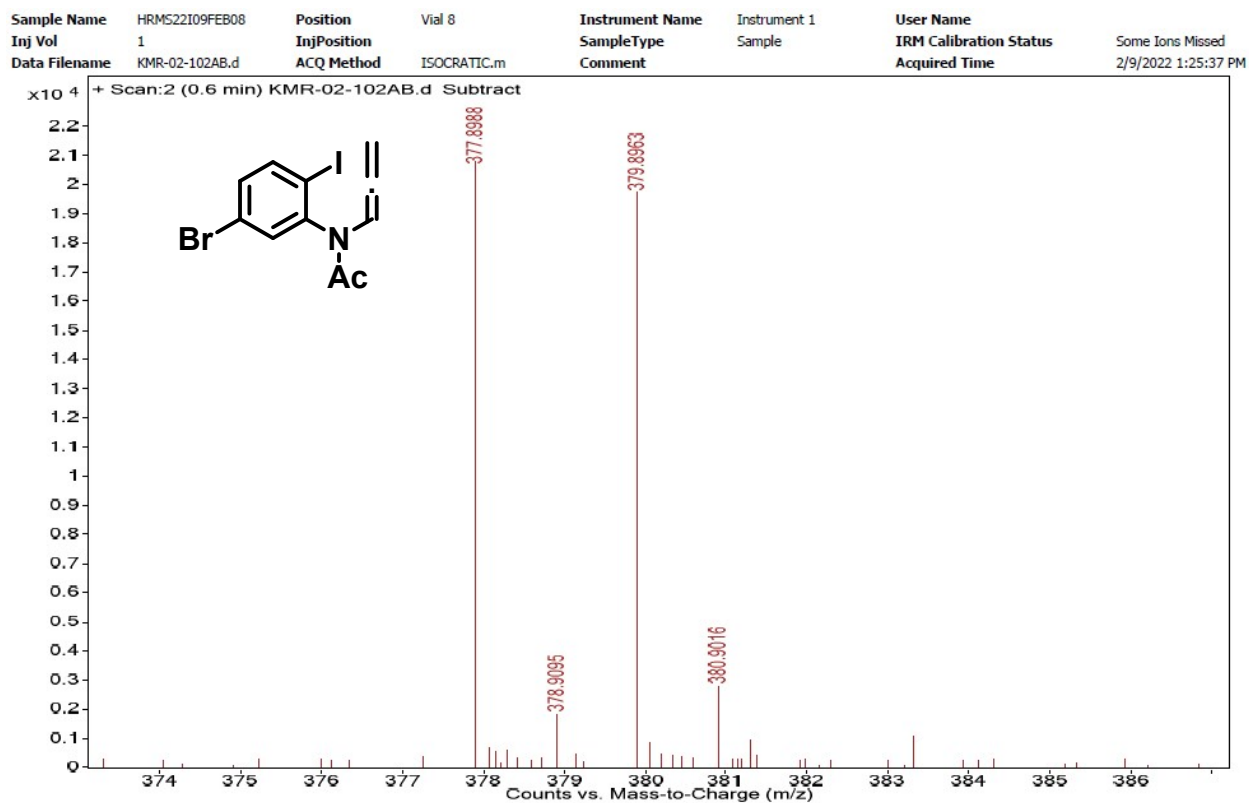

Figure S-25: HRMS spectrum of compound 1'i

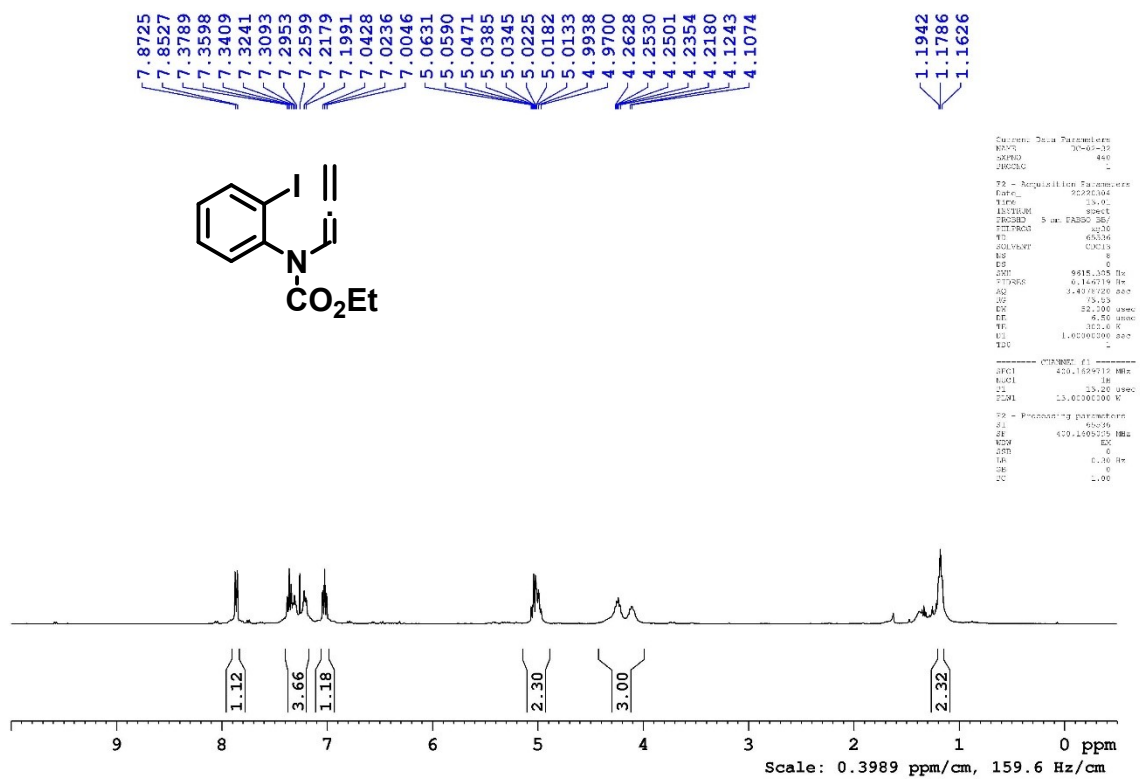

Figure S-26: <sup>1</sup>H NMR (400 MHz, CDCl<sub>3</sub>) spectrum of compound **10**

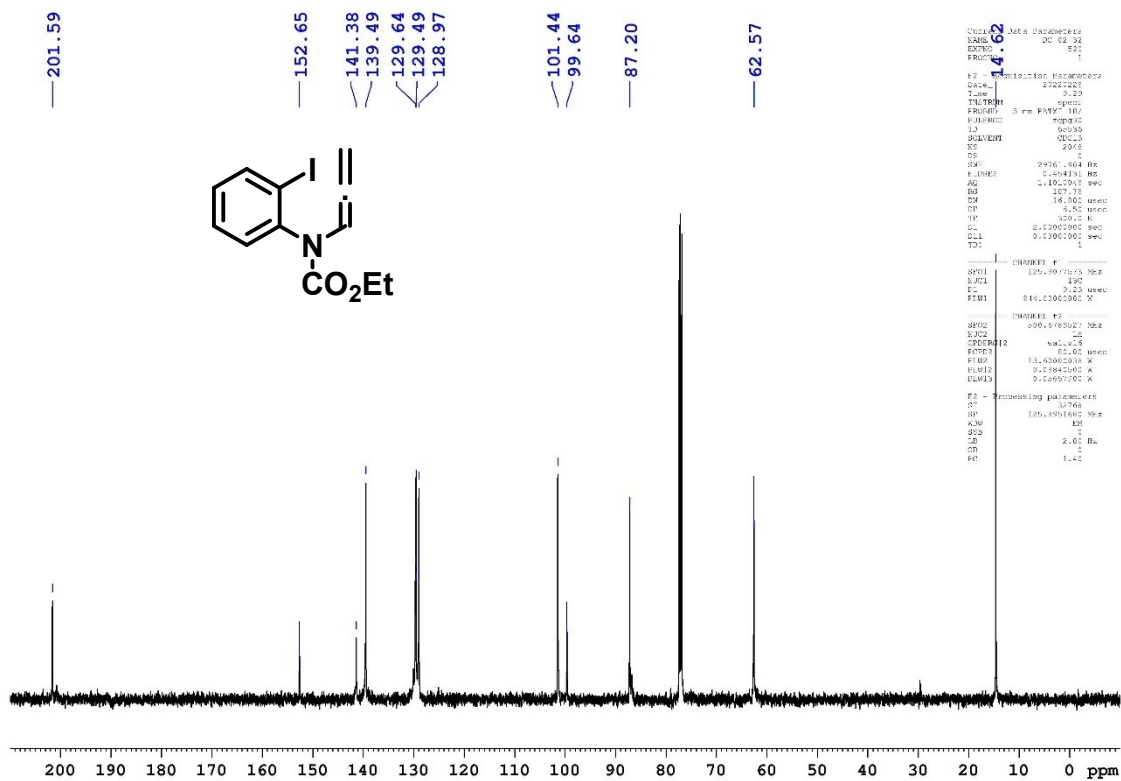

Figure S-27: <sup>13</sup>C NMR (125 MHz, CDCl<sub>3</sub>) spectrum of compound **10**

|               |                  |             |             |                 |              |                        |                     |
|---------------|------------------|-------------|-------------|-----------------|--------------|------------------------|---------------------|
| Sample Name   | HRMS22I02MARCH18 | Position    | Vial 18     | Instrument Name | Instrument 1 | User Name              |                     |
| Inj Vol       | 1                | InjPosition |             | SampleType      | Sample       | IRM Calibration Status | Some Ions Missed    |
| Data Filename | SD-01-822.d      | ACQ Method  | ISOCRATIC.m | Comment         |              | Acquired Time          | 3/2/2022 1:30:04 PM |

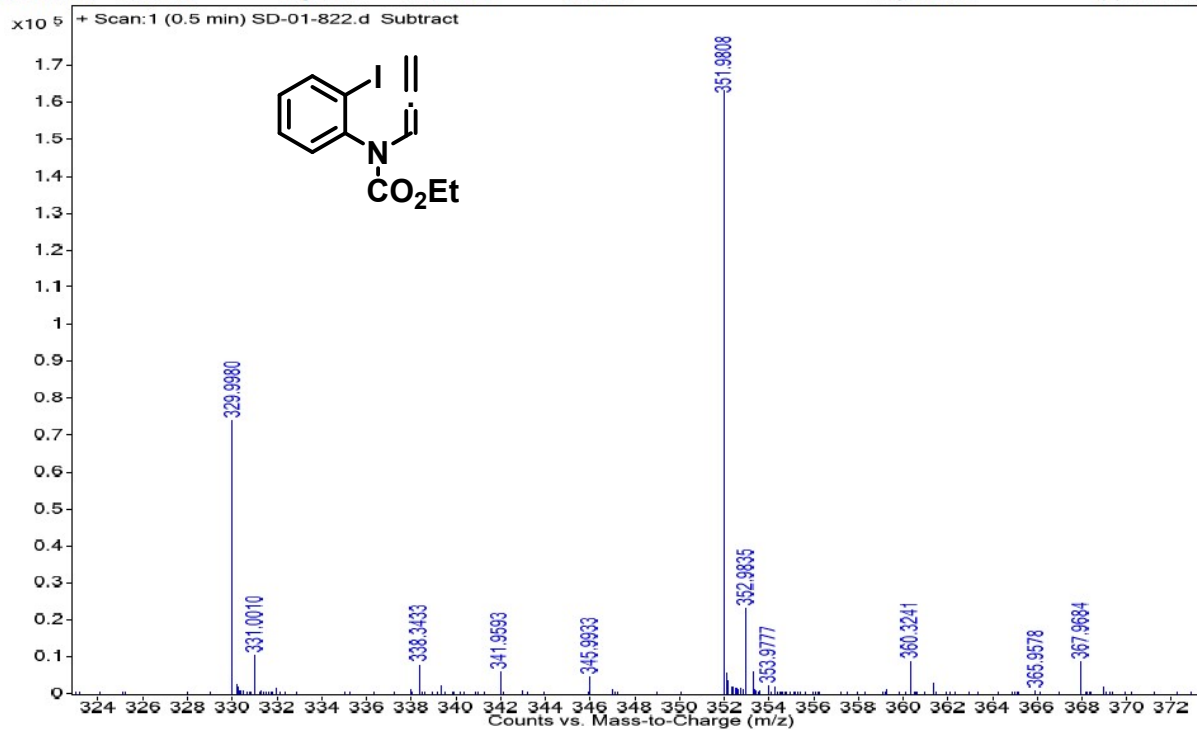

Figure S-28: HRMS spectrum of compound 1o

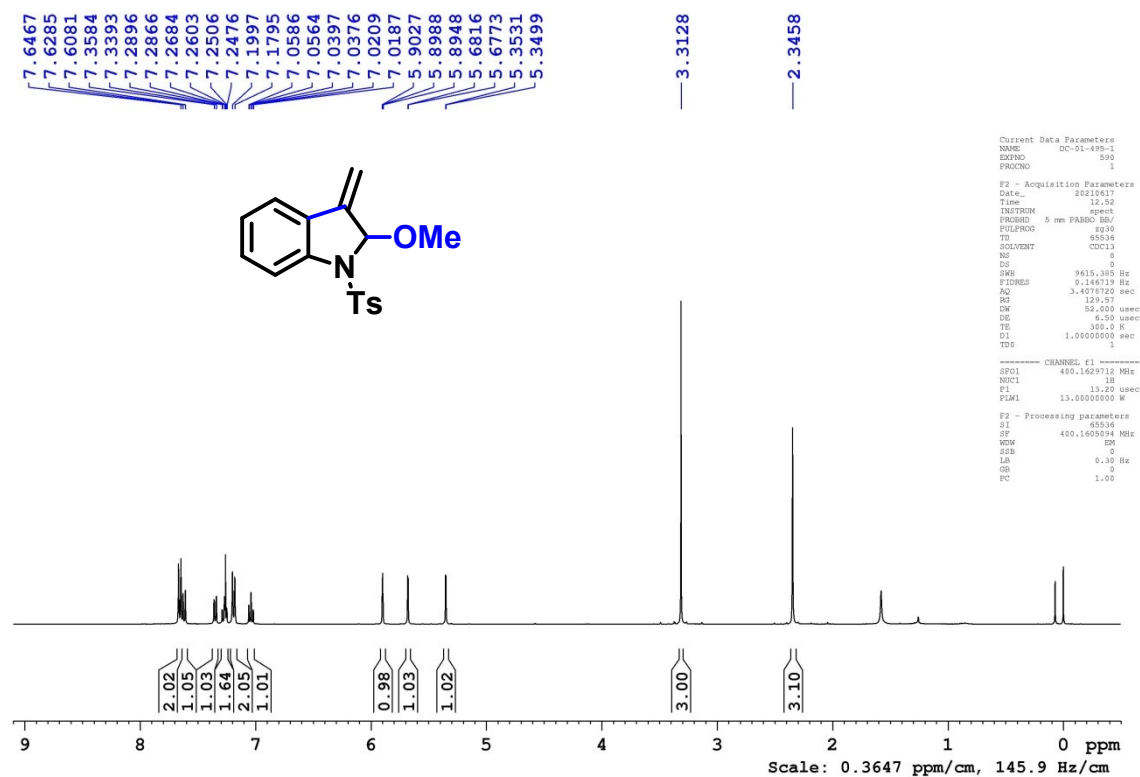

Figure S-29: <sup>1</sup>H NMR (400 MHz, CDCl<sub>3</sub>) spectrum of compound 3a

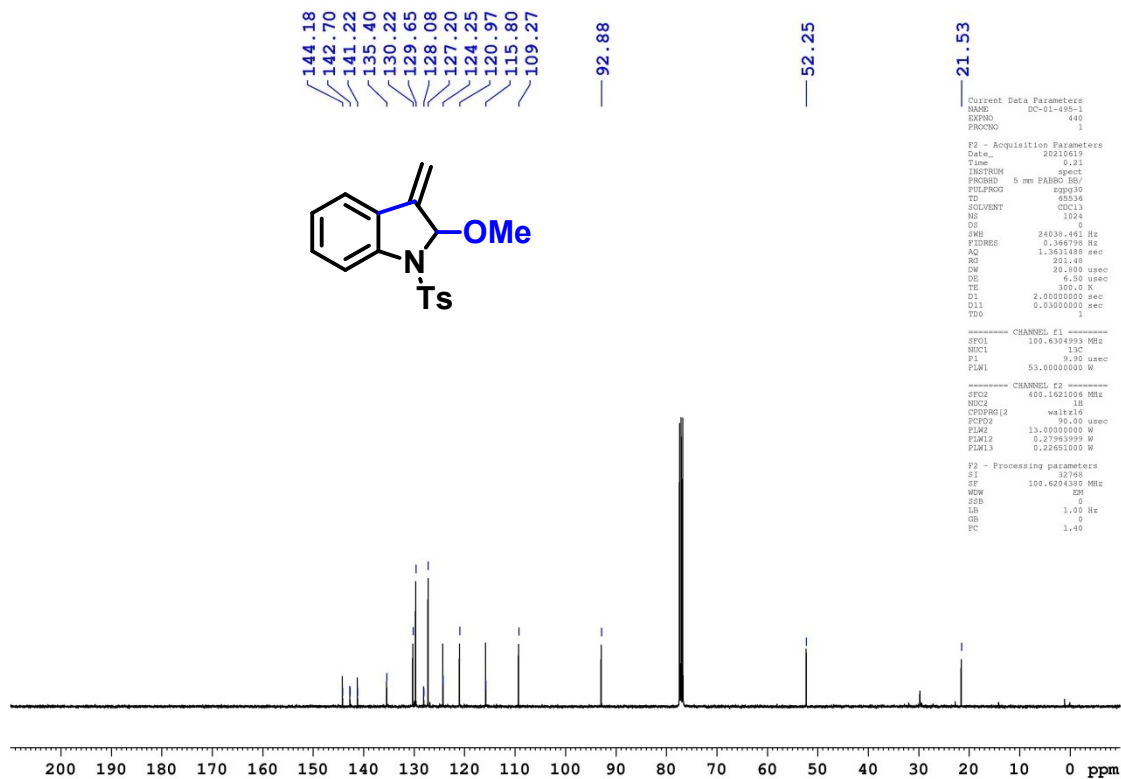

Figure S-30: <sup>13</sup>C NMR (100 MHz, CDCl<sub>3</sub>) spectrum of compound 3a

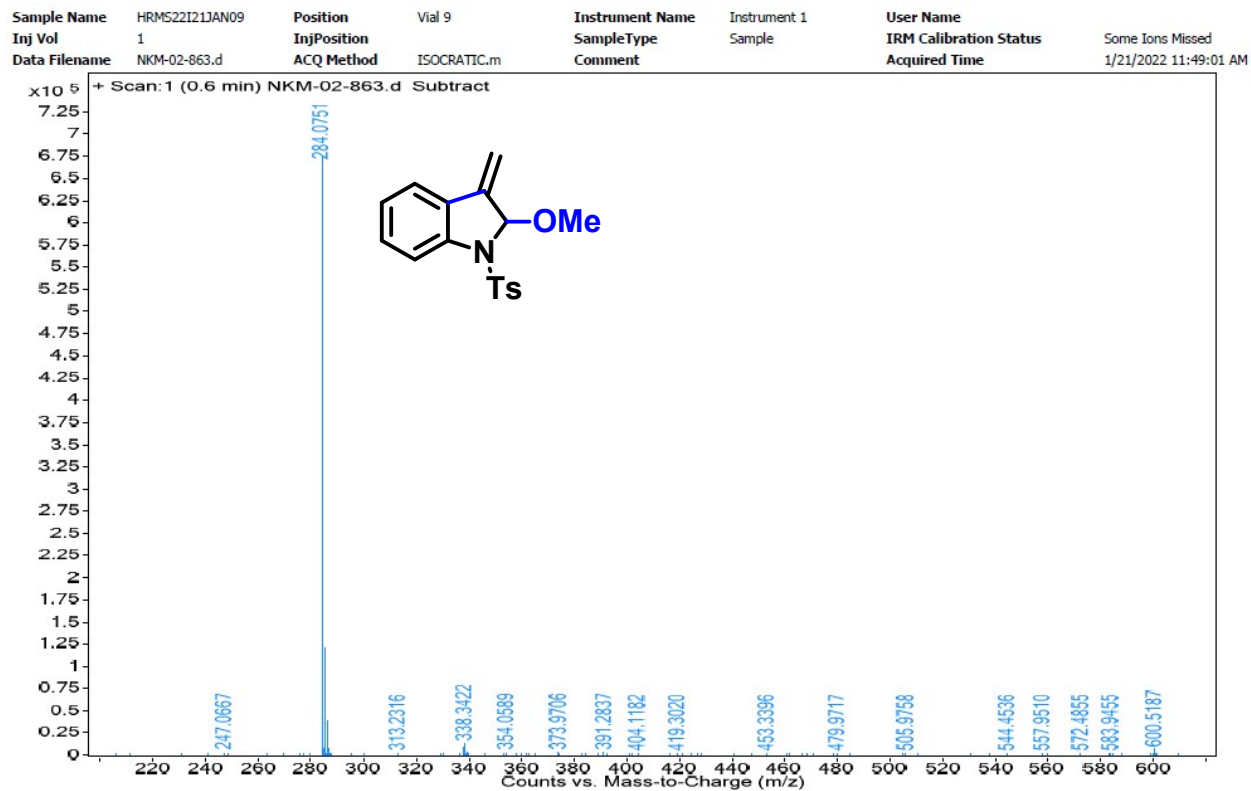

Figure S-31: HRMS spectrum of compound 3a

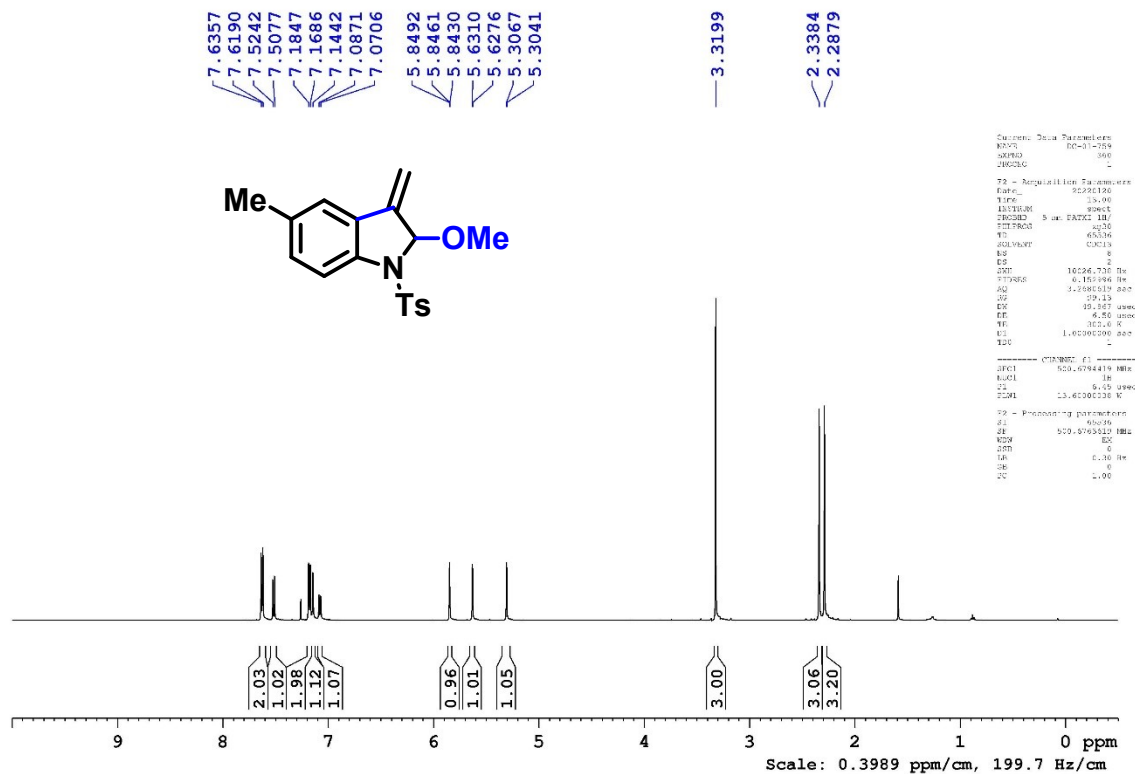

Figure S-32: <sup>1</sup>H NMR (500 MHz, CDCl<sub>3</sub>) spectrum of compound **3b**

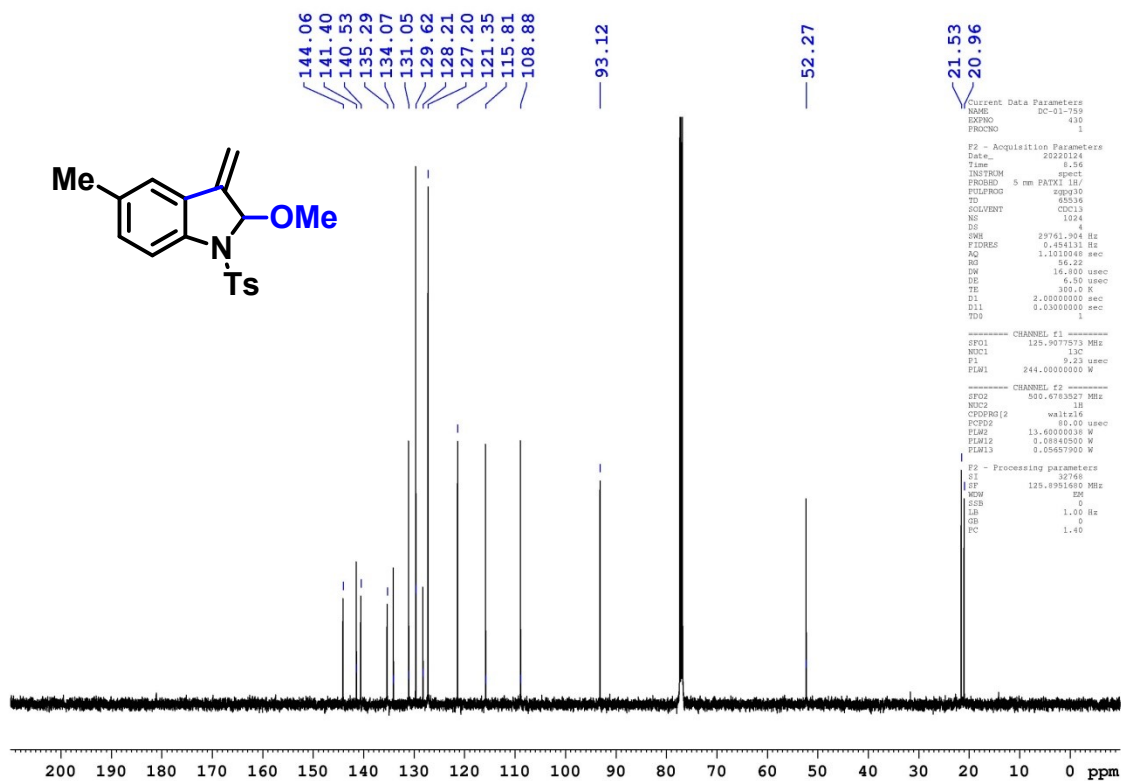

Figure S-33: <sup>13</sup>C NMR (125 MHz, CDCl<sub>3</sub>) spectrum of compound **3b**

| Sample Name   | HRMS22124JAN22 | Position    | Vial 22     | Instrument Name | Instrument 1 | User Name              |                       |
|---------------|----------------|-------------|-------------|-----------------|--------------|------------------------|-----------------------|
| Inj Vol       | 1              | InjPosition |             | SampleType      | Sample       | IRM Calibration Status | Some Ions Missed      |
| Data Filename | KM-CY-P2.d     | ACQ Method  | ISOCRATIC.m | Comment         |              | Acquired Time          | 1/24/2022 12:53:07 PM |

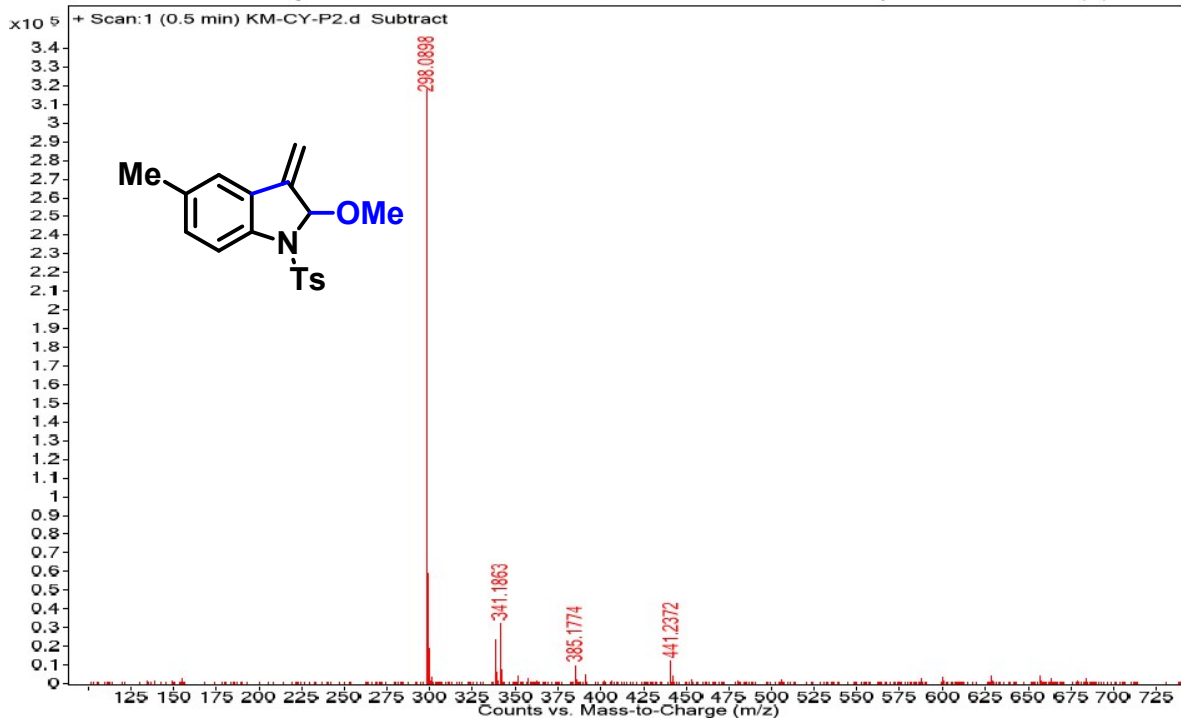

Figure S-34: HRMS spectrum of compound 3b

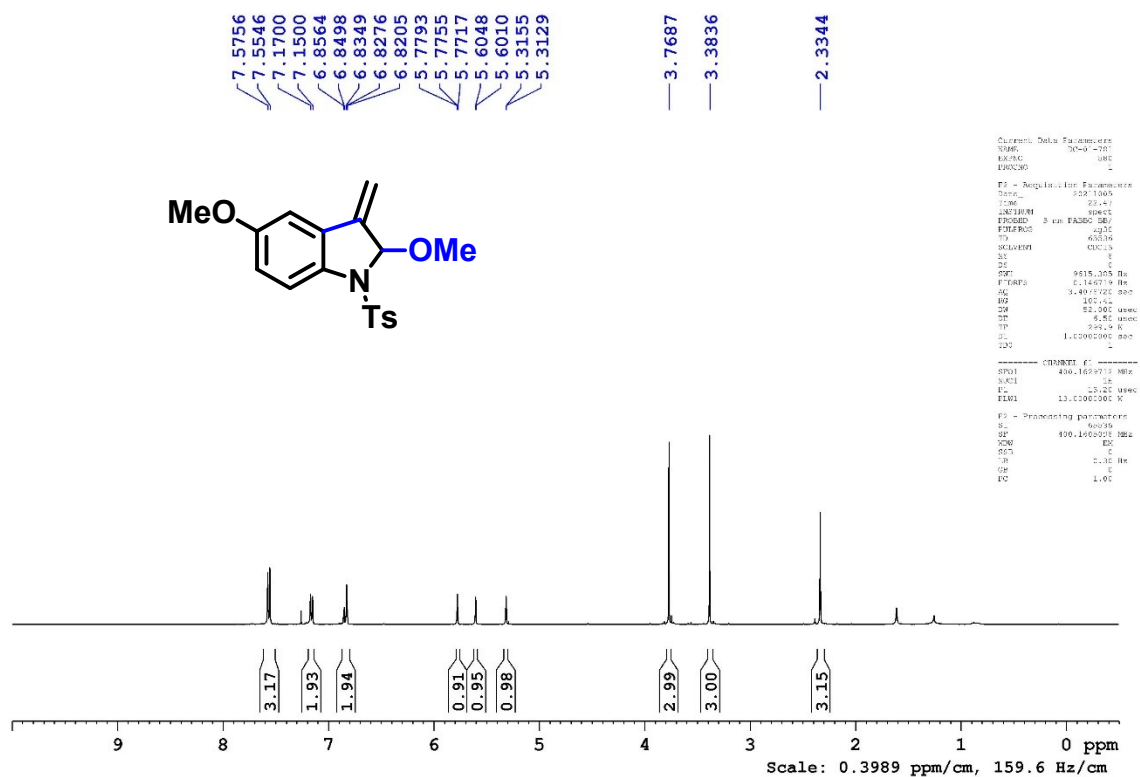

Figure S-35: <sup>1</sup>H NMR (400 MHz, CDCl<sub>3</sub>) spectrum of compound 3c

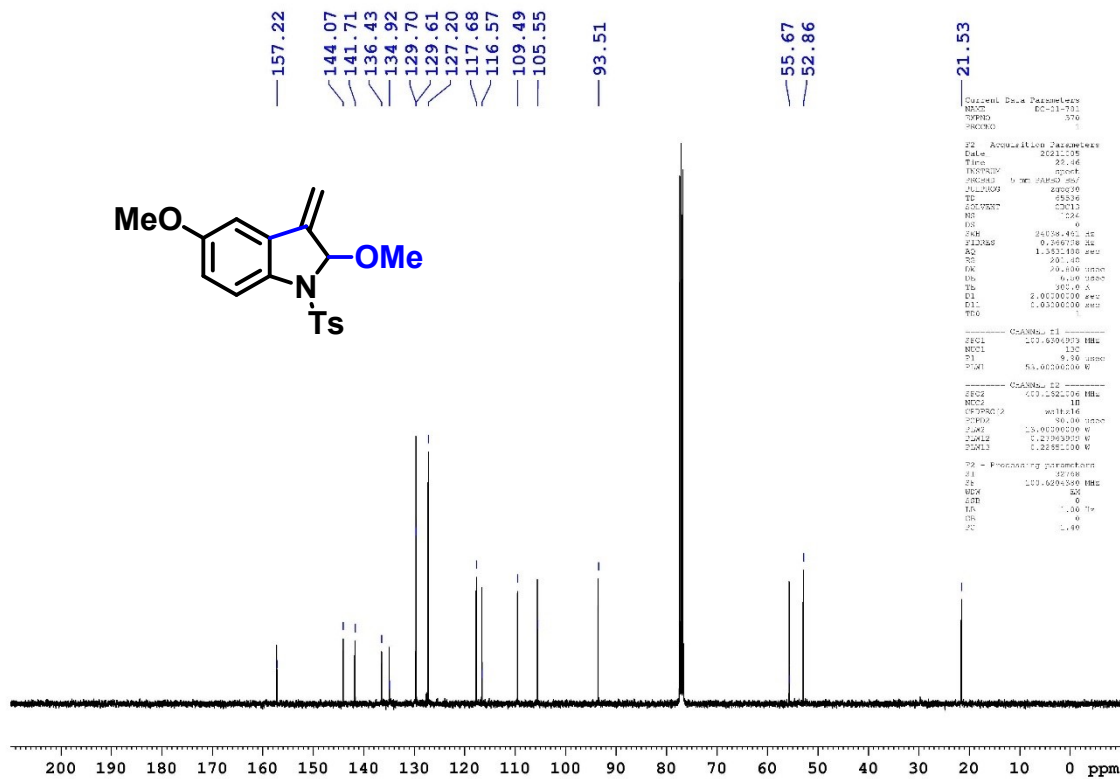

Figure S-36: <sup>13</sup>C NMR (100 MHz, CDCl<sub>3</sub>) spectrum of compound 3c

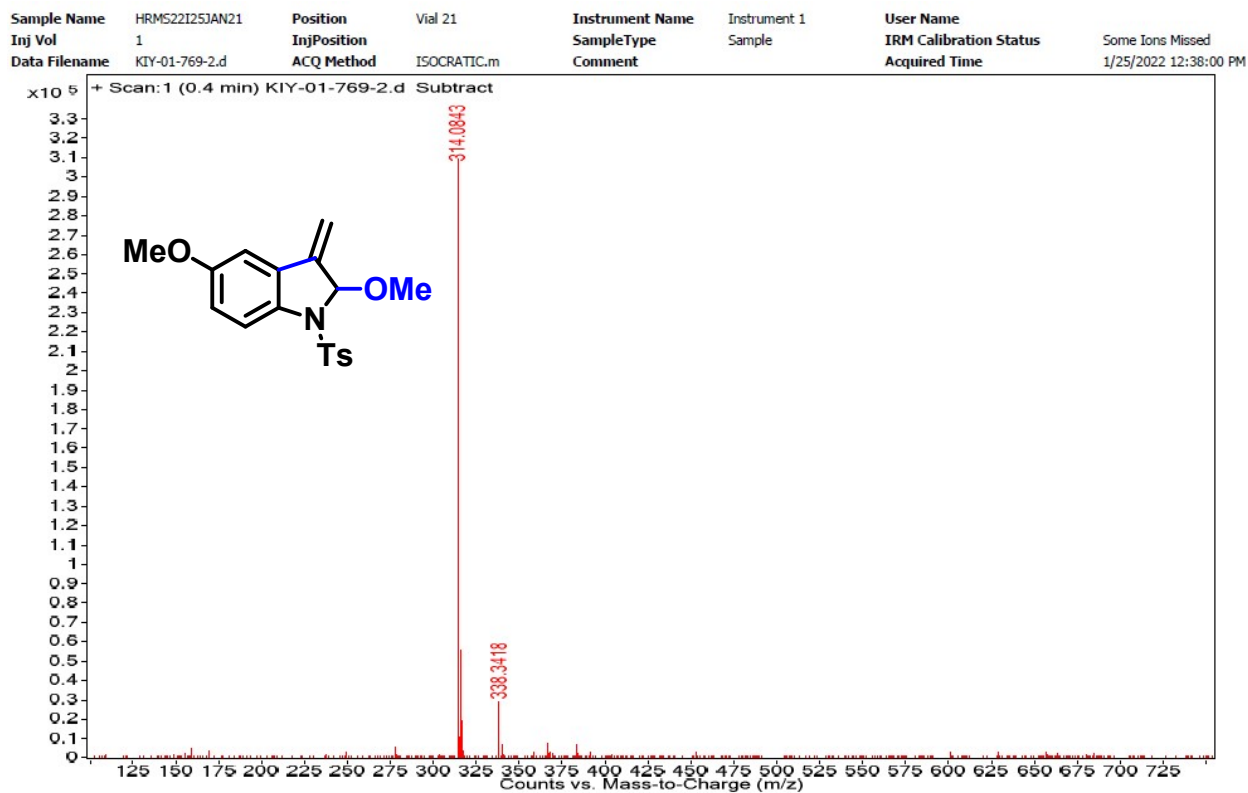

Figure S-37: HRMS spectrum of compound 3c



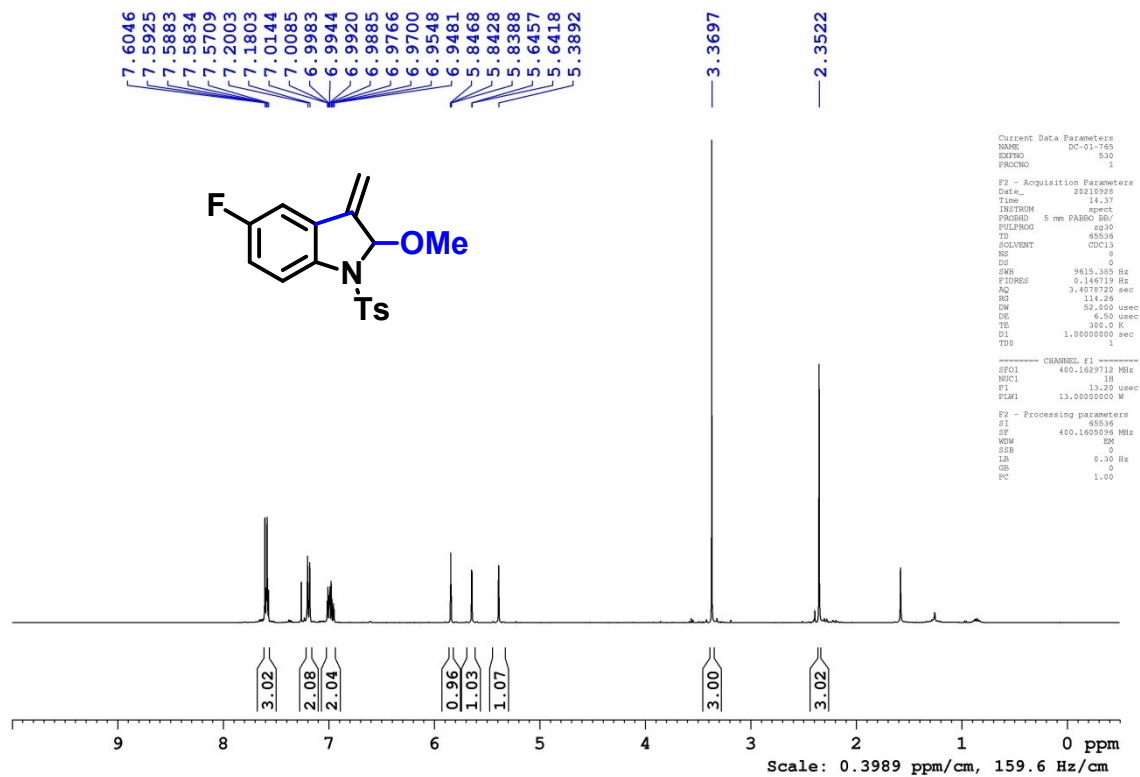

Figure S-38: <sup>1</sup>H NMR (400 MHz, CDCl<sub>3</sub>) spectrum of compound 3d

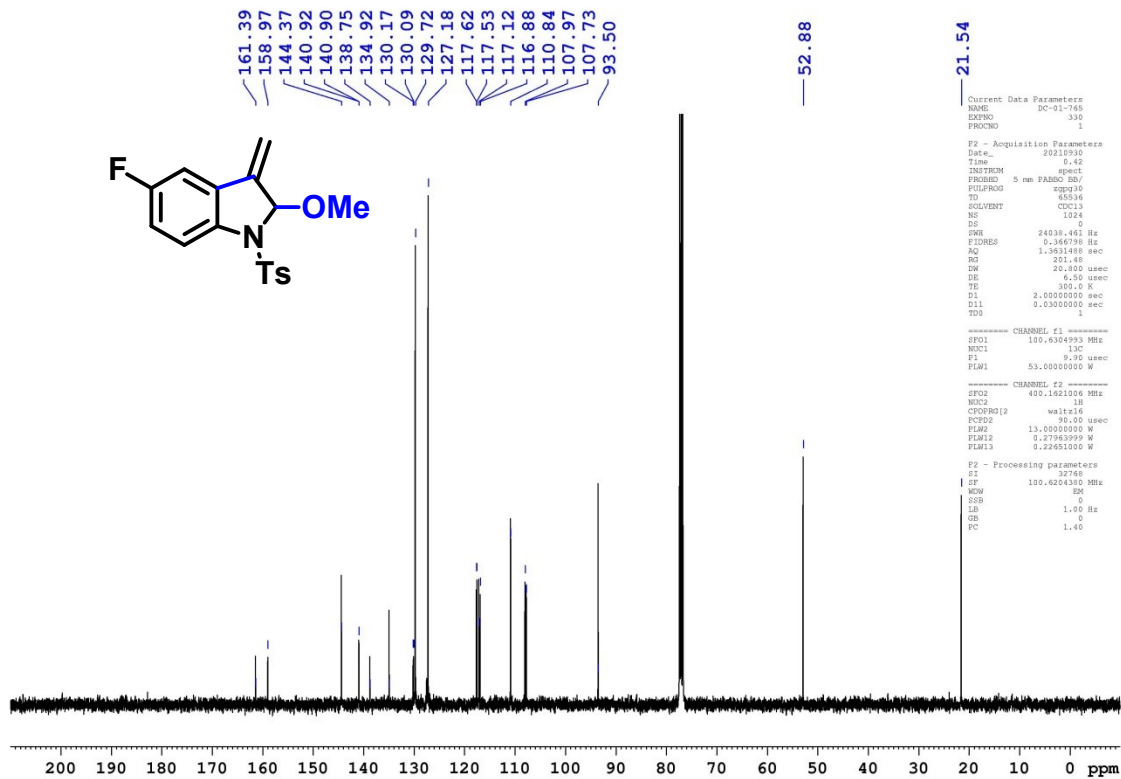

Figure S-39: <sup>13</sup>C NMR (100 MHz, CDCl<sub>3</sub>) spectrum of compound 3d



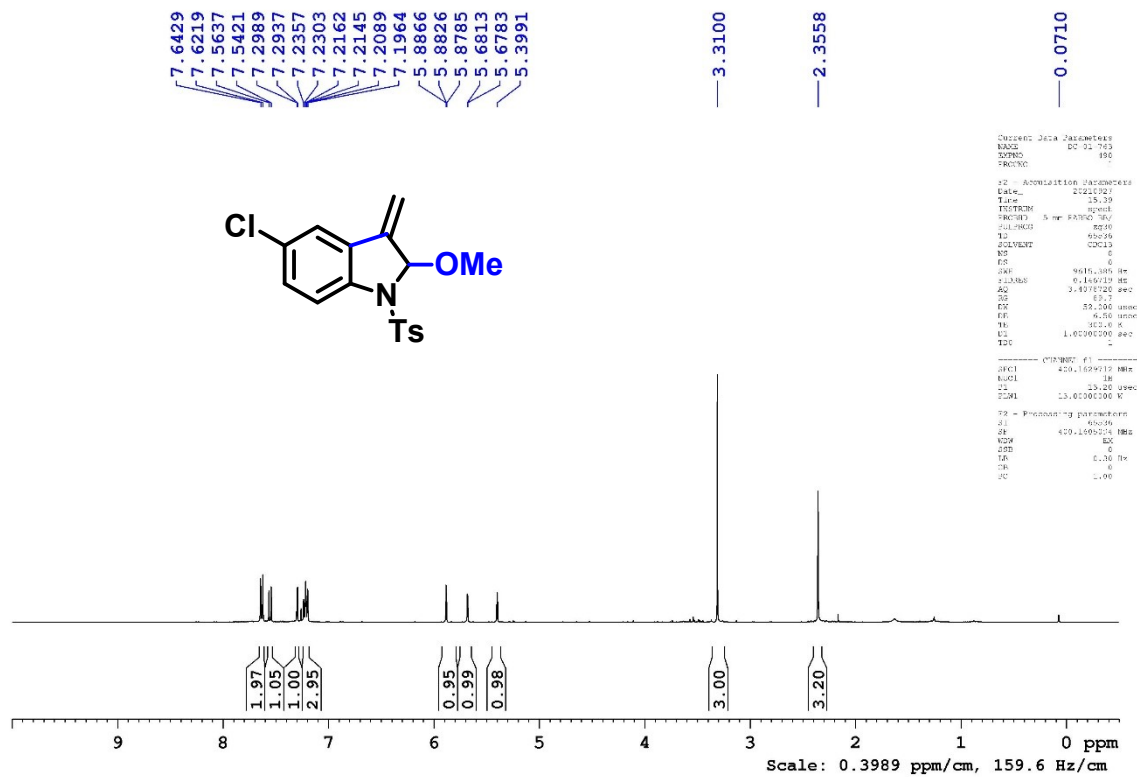

Figure S-42: <sup>1</sup>H NMR (400 MHz, CDCl<sub>3</sub>) spectrum of compound 3e

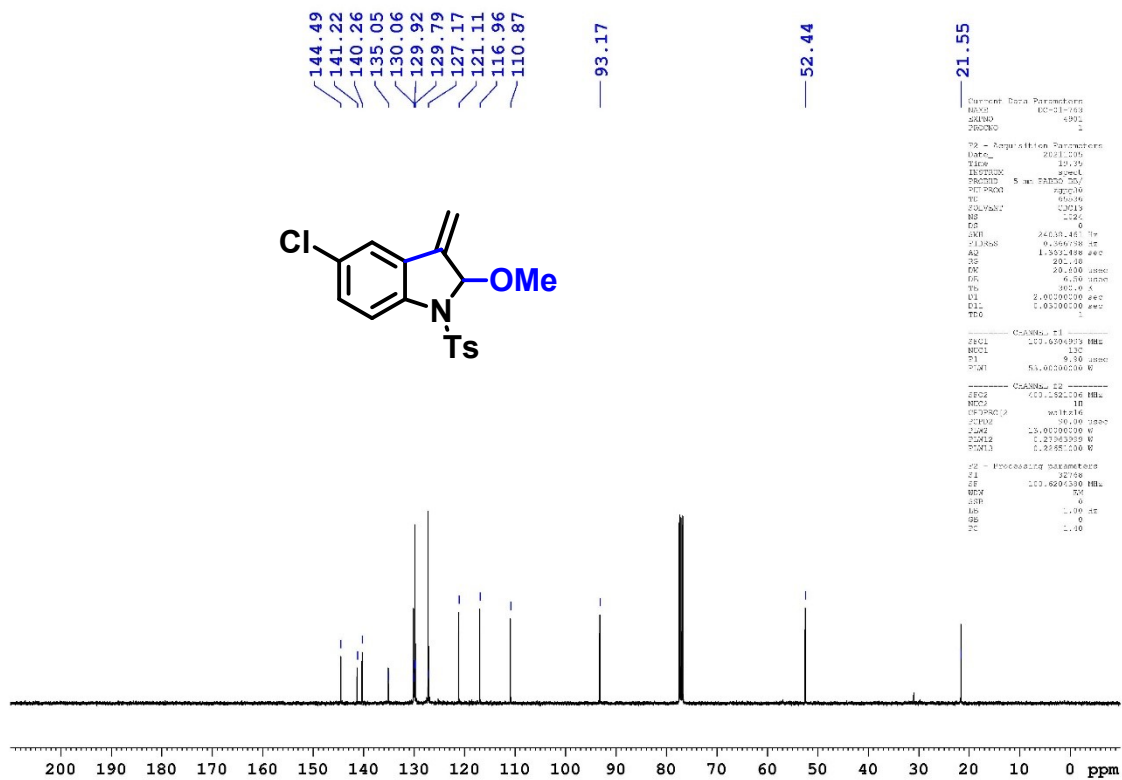

Figure S-43: <sup>13</sup>C NMR (100 MHz, CDCl<sub>3</sub>) spectrum of compound 3e

|               |                |             |             |                 |              |                        |                     |
|---------------|----------------|-------------|-------------|-----------------|--------------|------------------------|---------------------|
| Sample Name   | HRMS22101FEB20 | Position    | Vial 20     | Instrument Name | Instrument 1 | User Name              |                     |
| Inj Vol       | 1              | InjPosition |             | SampleType      | Sample       | IRM Calibration Status | Some Ions Missed    |
| Data Filename | KMR-02-79A3.d  | ACQ Method  | ISOCRATIC.m | Comment         |              | Acquired Time          | 2/1/2022 1:02:24 PM |

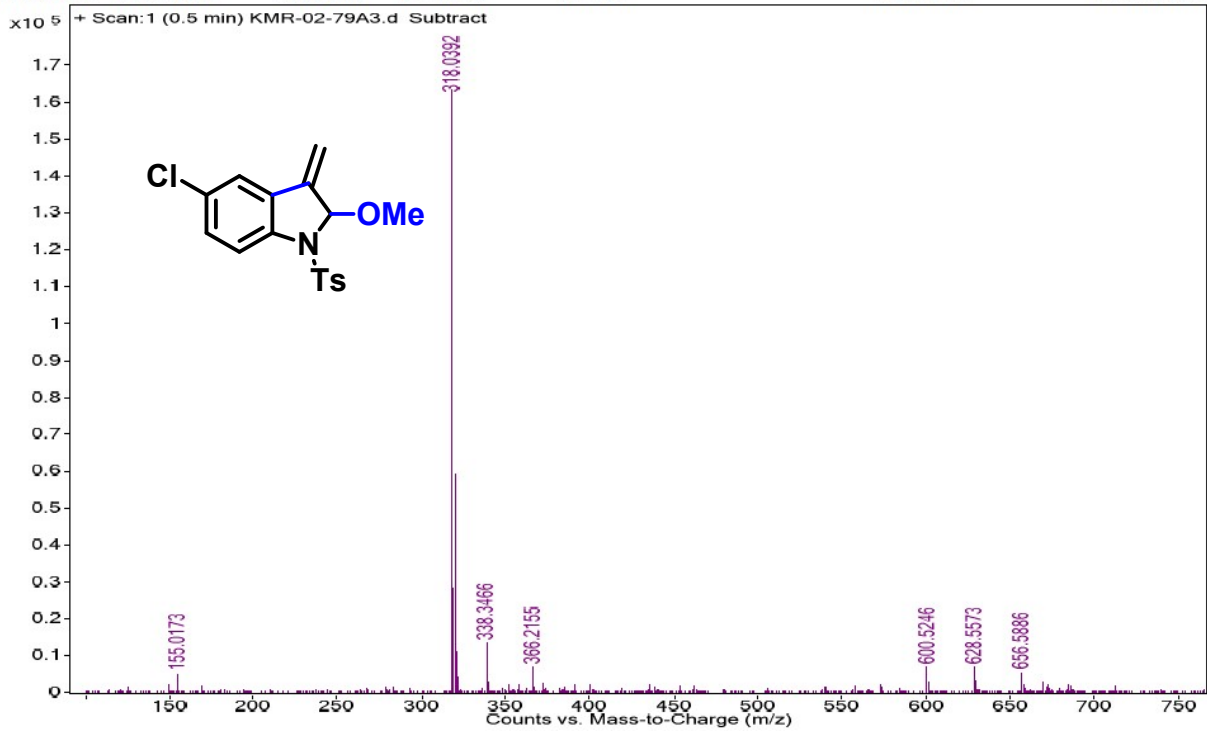

Figure S-44: HRMS spectrum of compound 3e

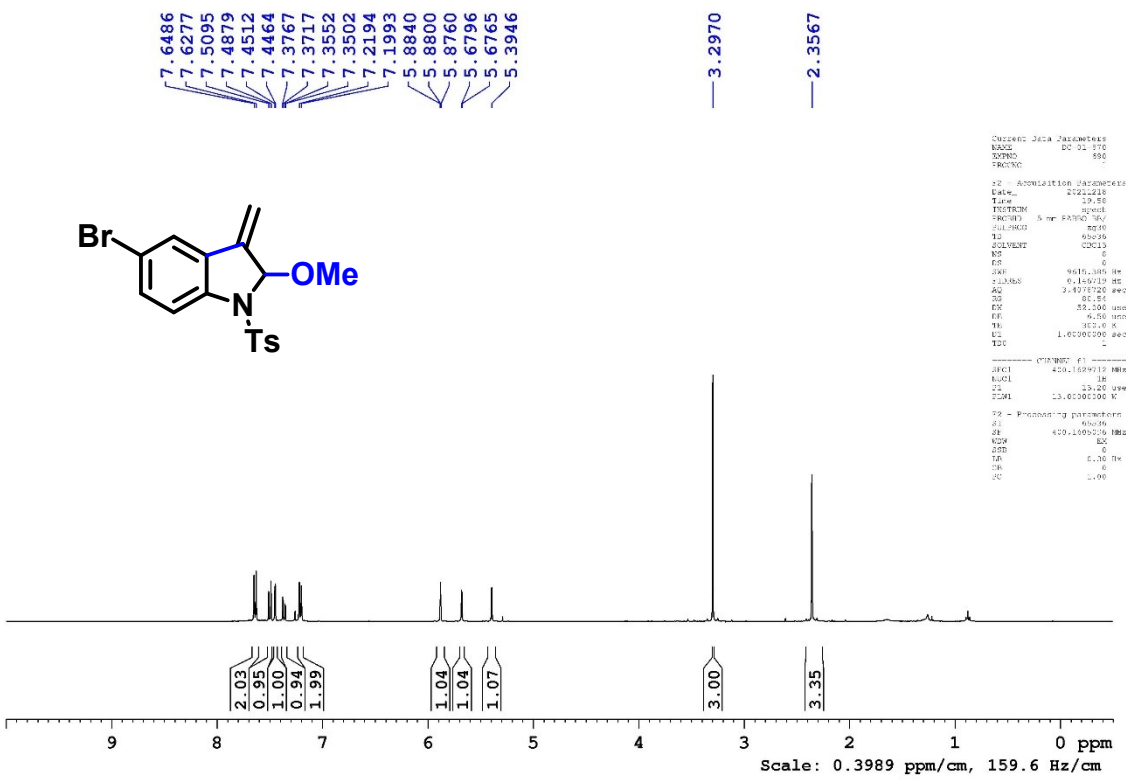

Figure S-45: <sup>1</sup>H NMR (400 MHz, CDCl<sub>3</sub>) spectrum of compound 3f



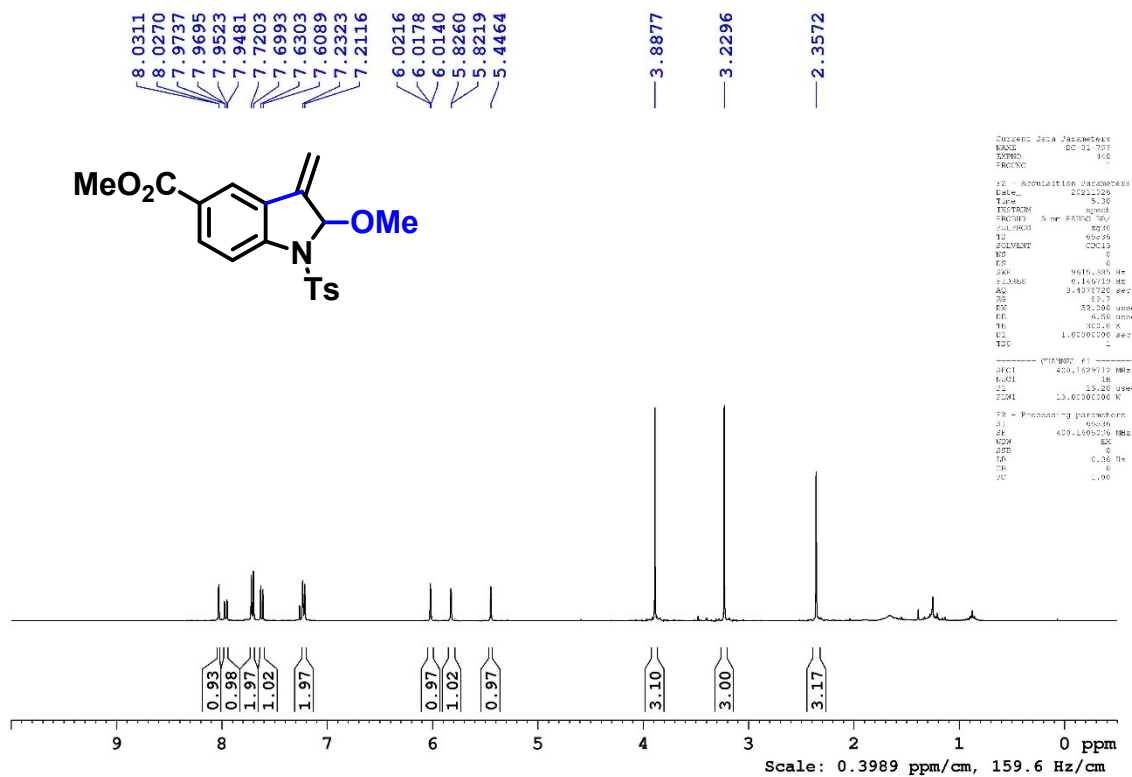

Figure S-48: <sup>1</sup>H NMR (400 MHz, CDCl<sub>3</sub>) spectrum of compound **3g**

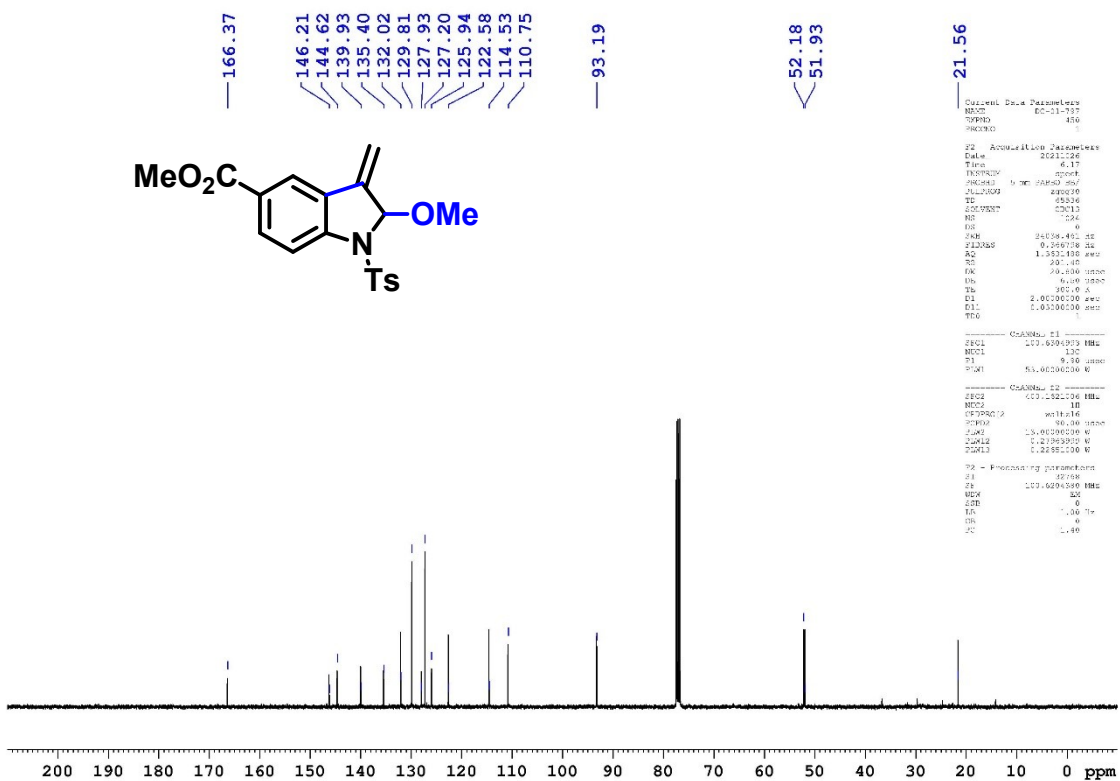

Figure S-49: <sup>13</sup>C NMR (100 MHz, CDCl<sub>3</sub>) spectrum of compound **3g**

| Sample Name   | HRMS22131JAN07 | Position    | Vial 7      | Instrument Name | Instrument 1 | User Name              |                       |
|---------------|----------------|-------------|-------------|-----------------|--------------|------------------------|-----------------------|
| Inj Vol       | 1              | InjPosition |             | SampleType      | Sample       | IRM Calibration Status | Some Ions Missed      |
| Data Filename | NKM-02-115.d   | ACQ Method  | ISOCRATIC.m | Comment         |              | Acquired Time          | 1/31/2022 11:56:34 AM |

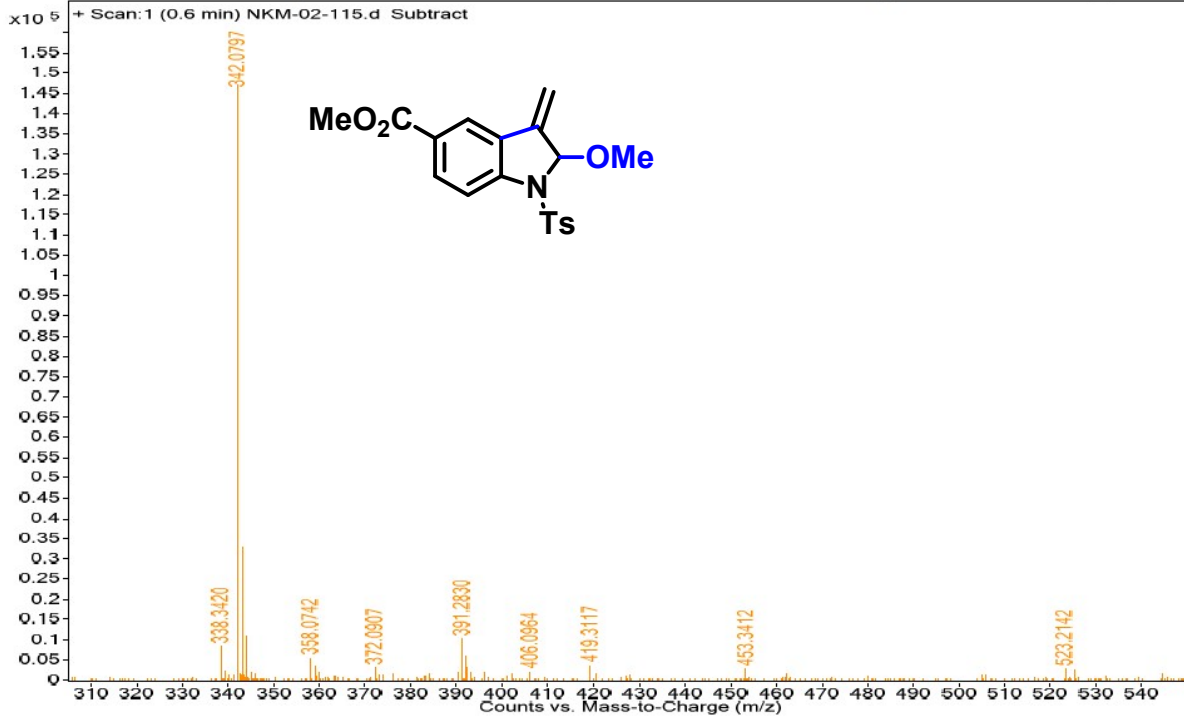

Figure S-50: HRMS spectrum of compound **3g**

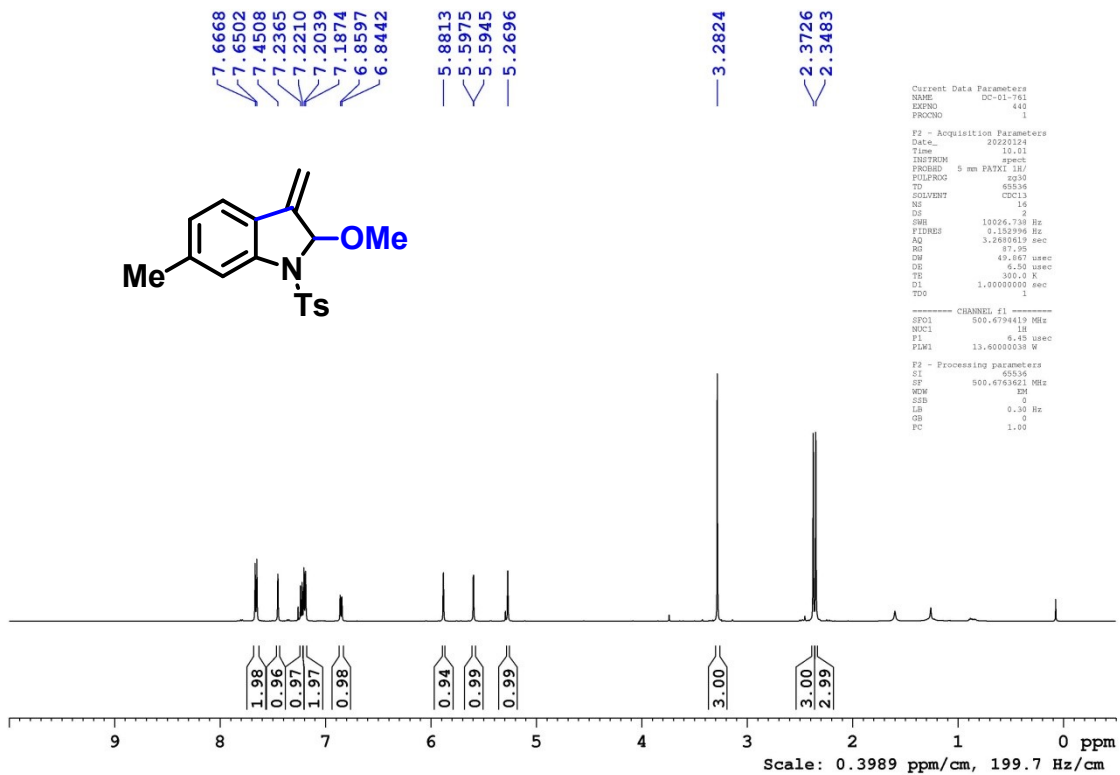

Figure S-51:  $^1\text{H}$  NMR (500 MHz,  $\text{CDCl}_3$ ) spectrum of compound **3h**

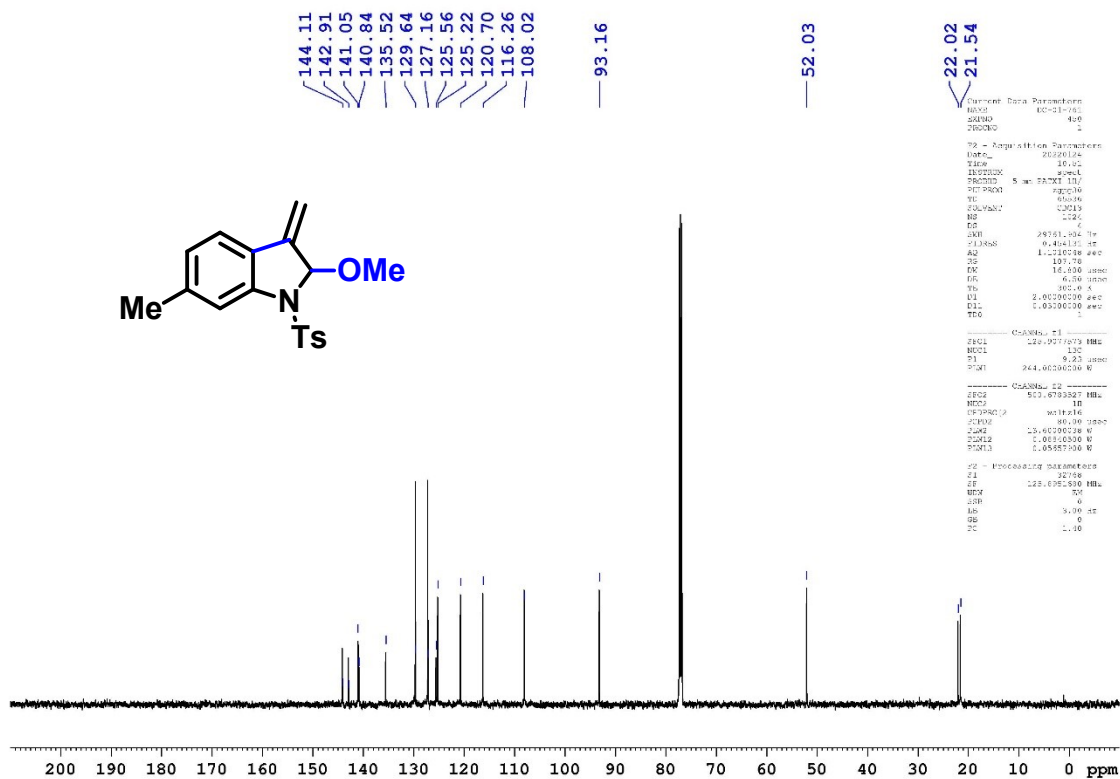

Figure S-52: <sup>13</sup>C NMR (125 MHz, CDCl<sub>3</sub>) spectrum of compound 3h

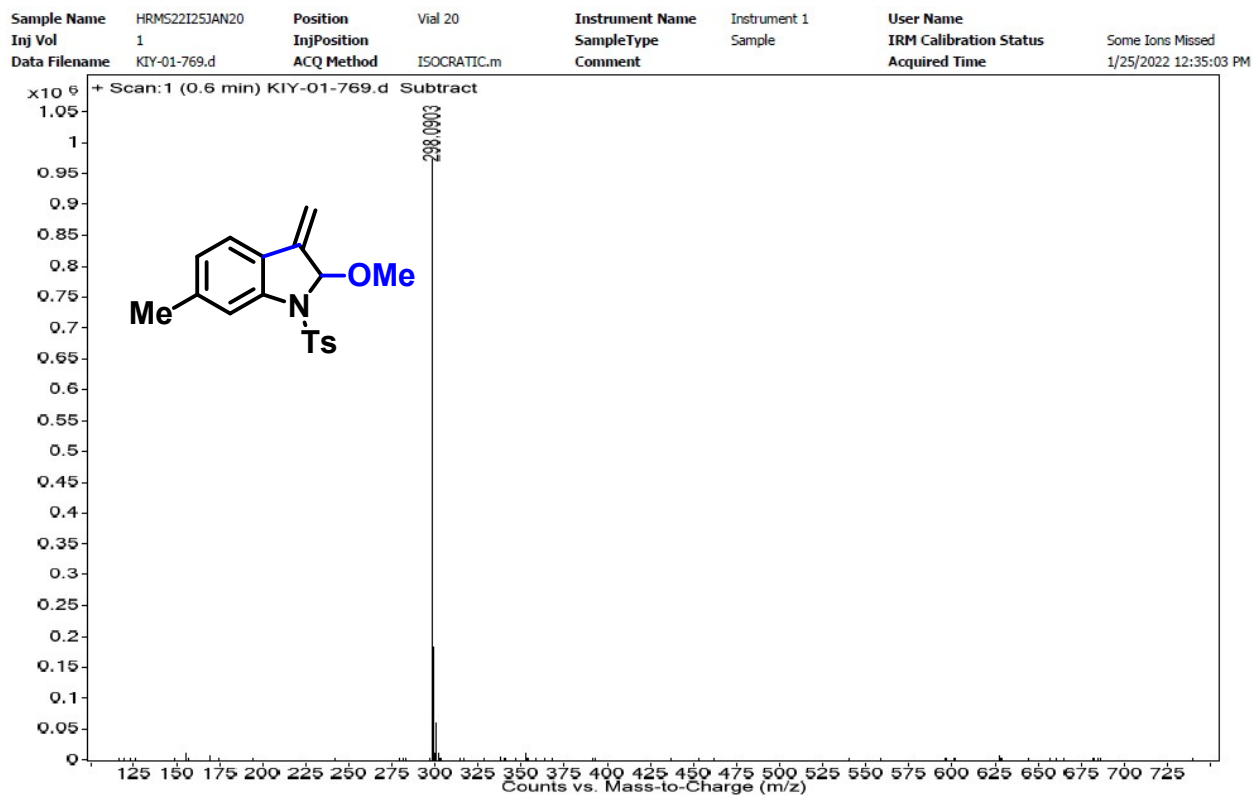

Figure S-53: HRMS spectrum of compound 3h



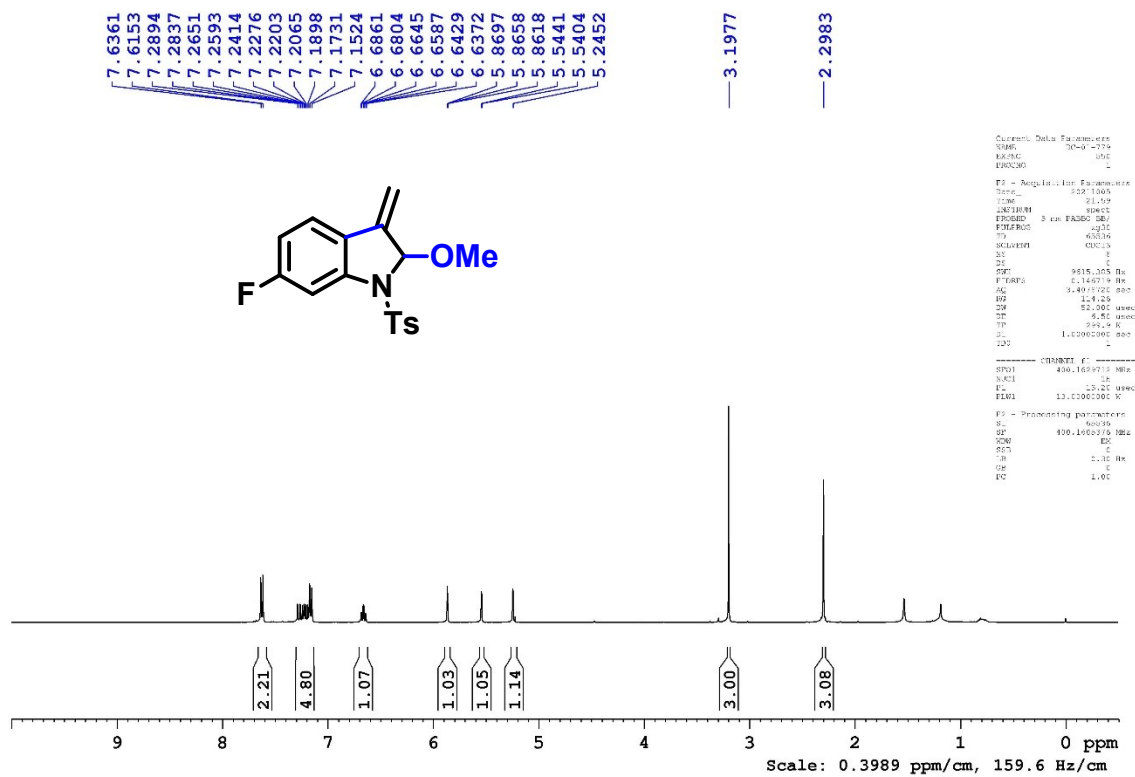

Figure S-54: <sup>1</sup>H NMR (400 MHz, CDCl<sub>3</sub>) spectrum of compound **3i**

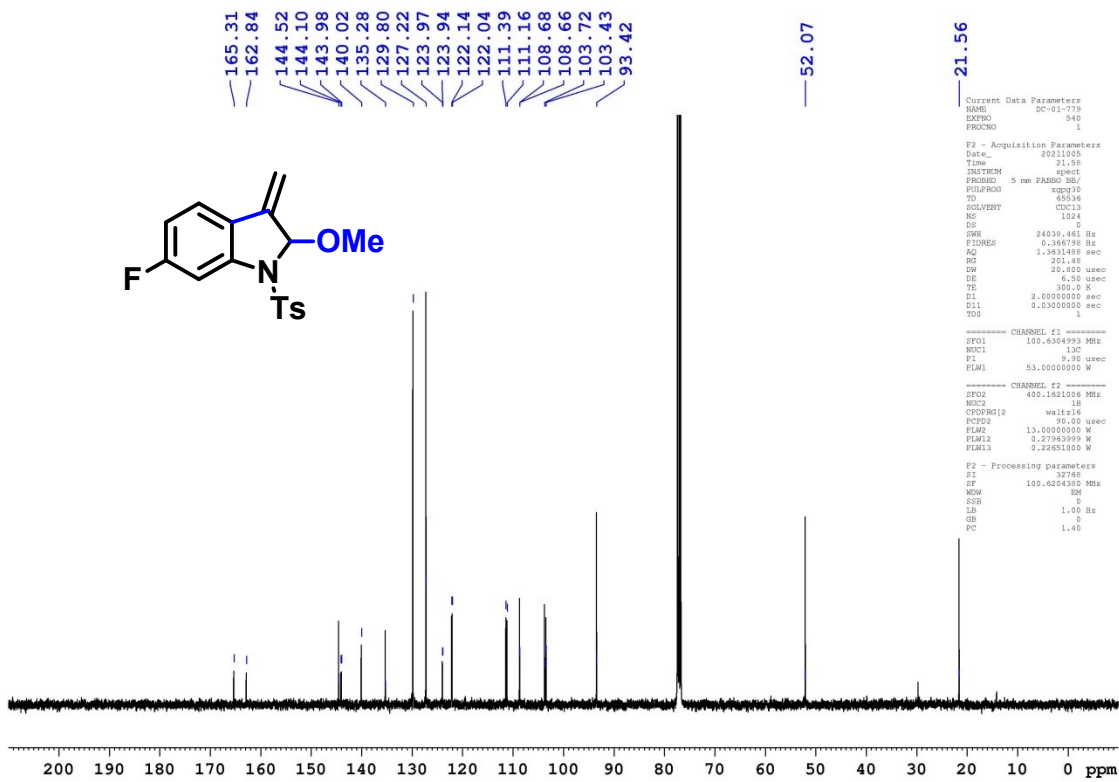

Figure S-55: <sup>13</sup>C NMR (100 MHz, CDCl<sub>3</sub>) spectrum of compound **3i**

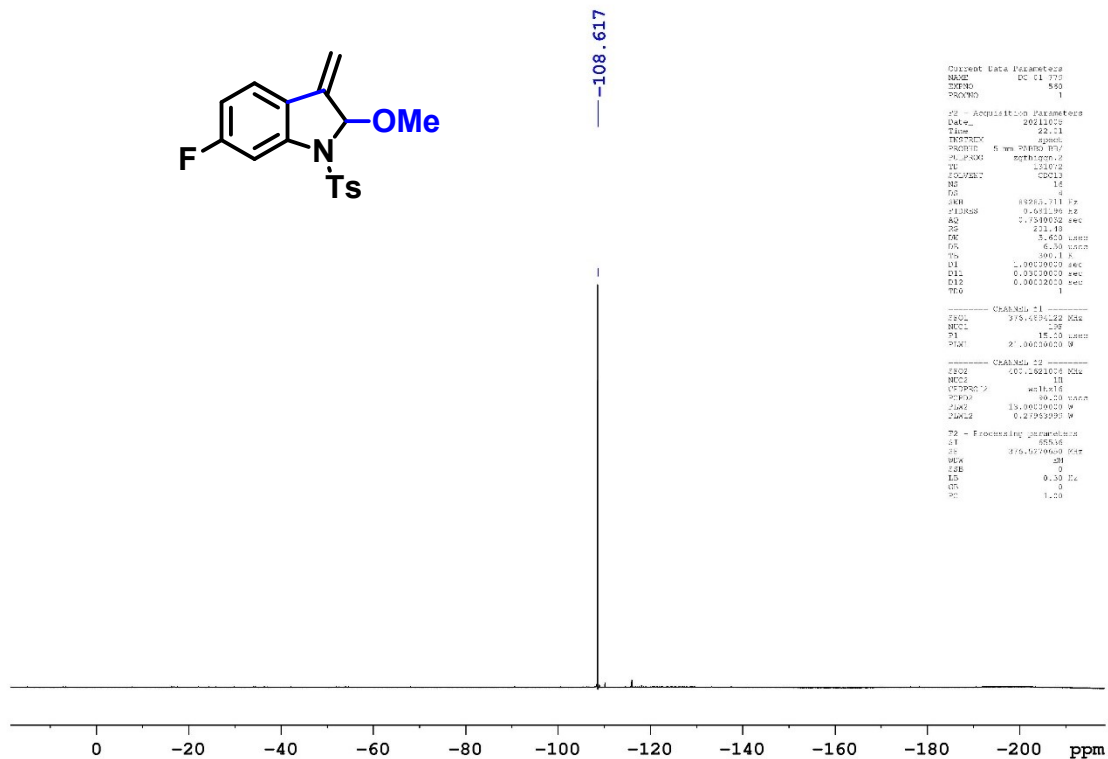

Figure S-56:  $^{19}\text{F}$  NMR (376 MHz,  $\text{CDCl}_3$ ) spectrum of compound 3i

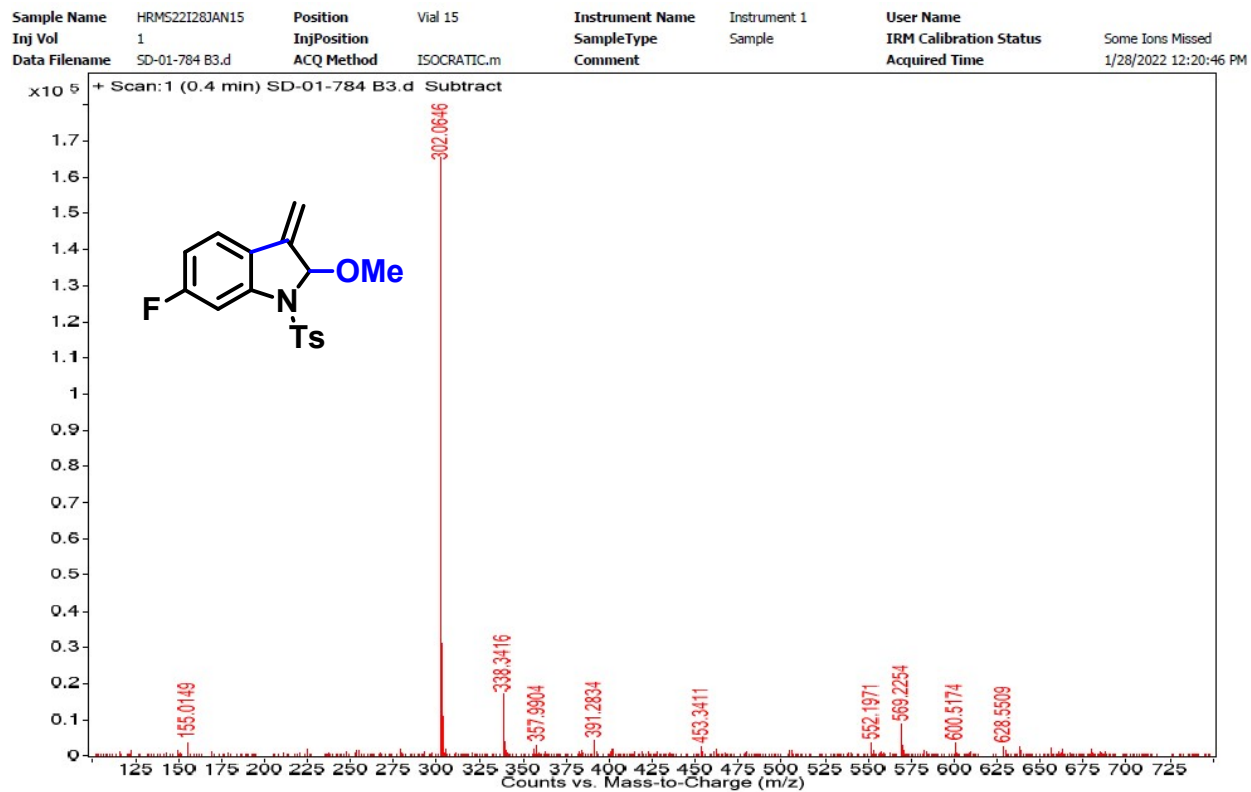

Figure S-57: HRMS spectrum of compound 3i



|               |                |             |             |                 |              |                        |                      |
|---------------|----------------|-------------|-------------|-----------------|--------------|------------------------|----------------------|
| Sample Name   | HRM522101FEB19 | Position    | Vial 19     | Instrument Name | Instrument 1 | User Name              |                      |
| Inj Vol       | 1              | InjPosition |             | SampleType      | Sample       | IRM Calibration Status | Some Ions Missed     |
| Data Filename | KMR-02-79A2.d  | ACQ Method  | ISOCRATIC.m | Comment         |              | Acquired Time          | 2/1/2022 12:59:17 PM |

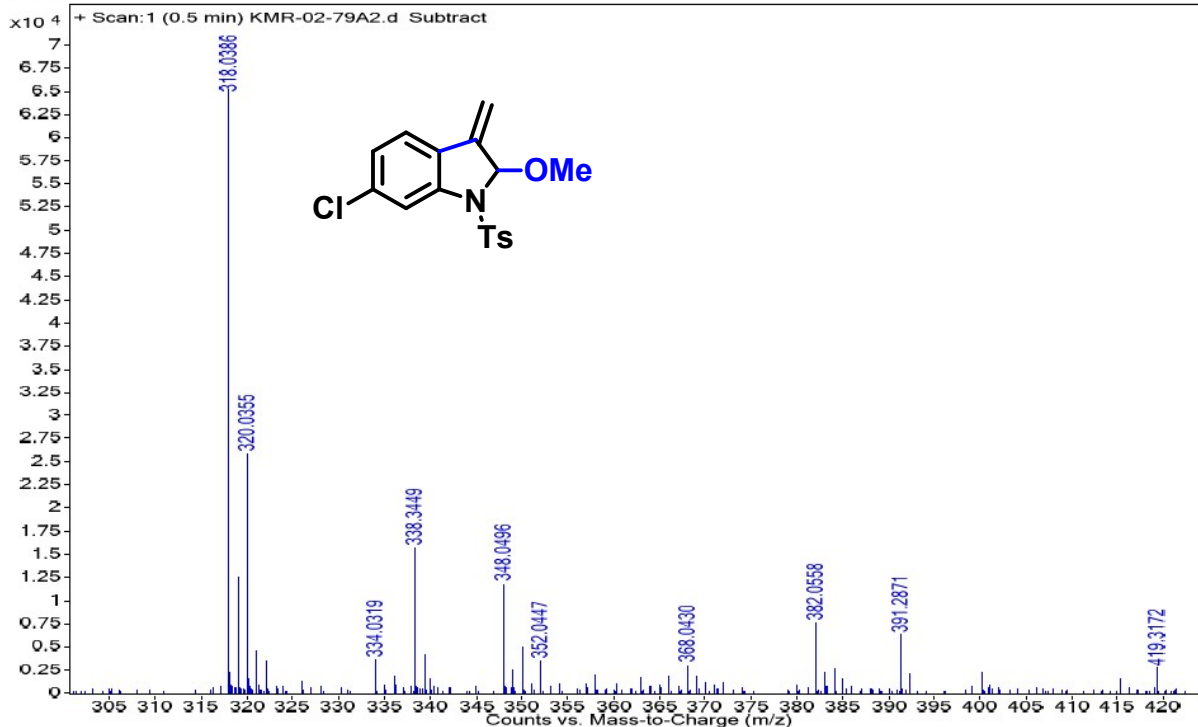

Figure S-60: HRMS spectrum of compound 3j

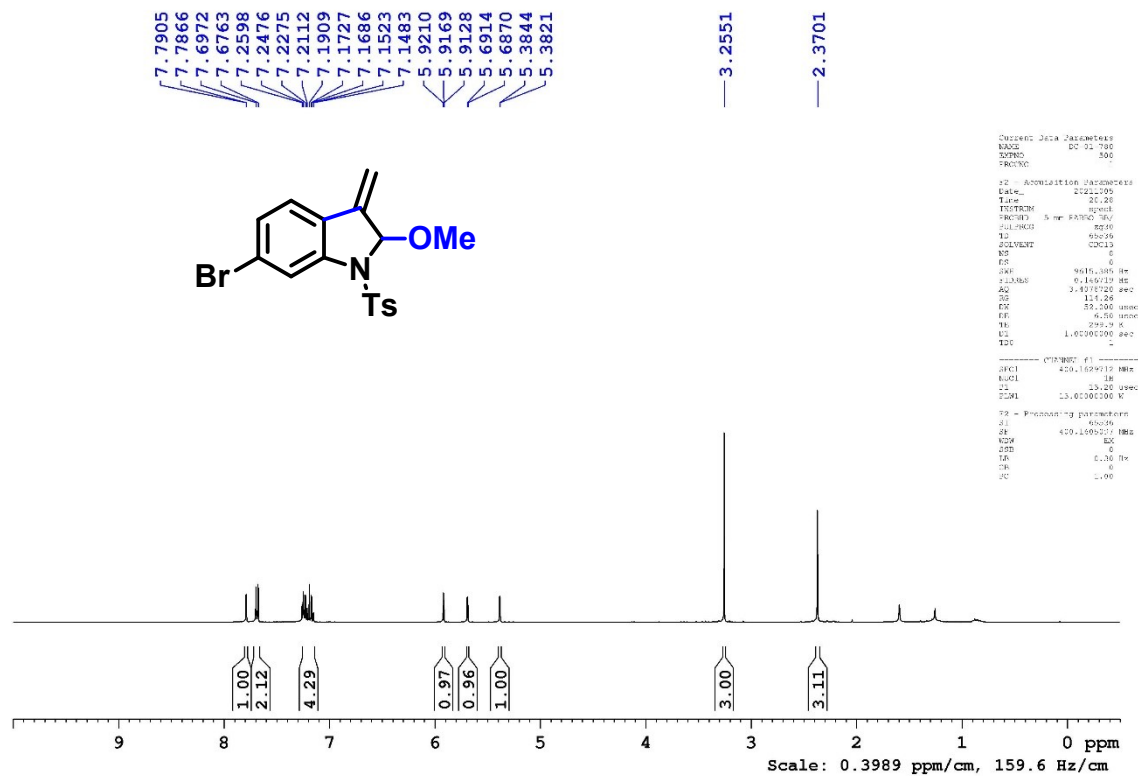

Figure S-61: <sup>1</sup>H NMR (400 MHz, CDCl<sub>3</sub>) spectrum of compound 3k



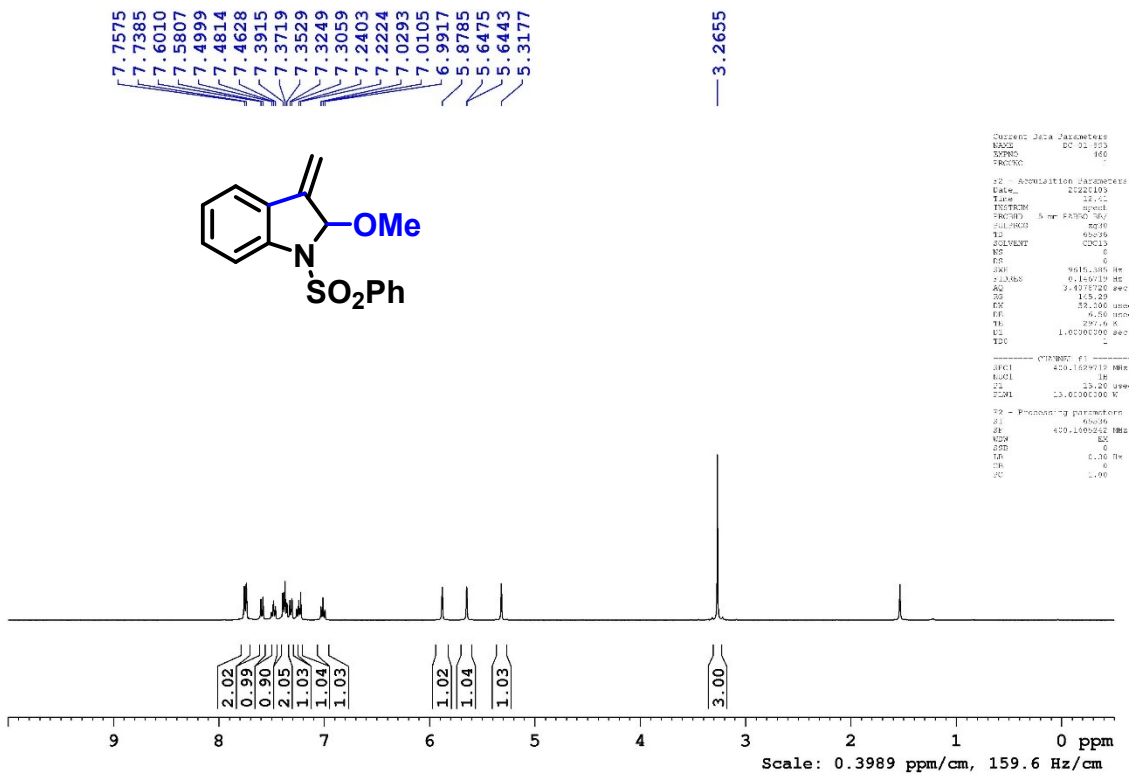

Figure S-64: <sup>1</sup>H NMR (400 MHz, CDCl<sub>3</sub>) spectrum of compound **31**

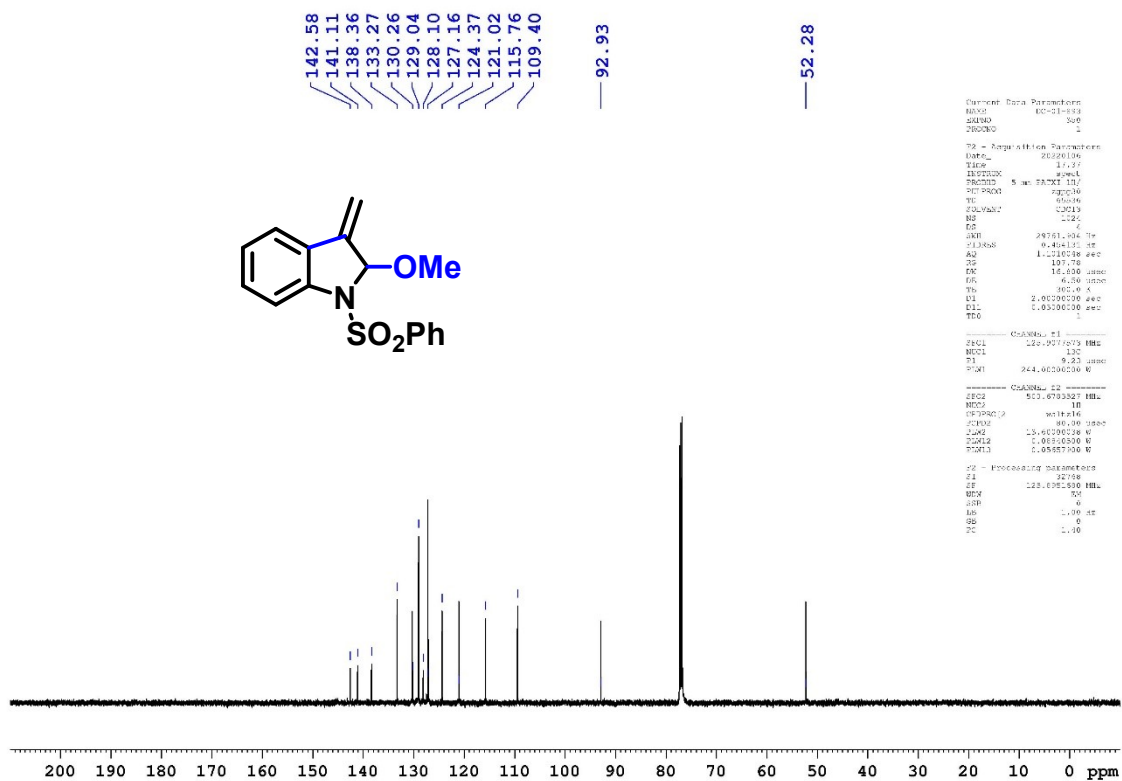

Figure S-65: <sup>13</sup>C NMR (125 MHz, CDCl<sub>3</sub>) spectrum of compound **31**

Sample Name HRMS22124JAN06 Position Vial 6 Instrument Name Instrument 1 User Name  
 Inj Vol 1 InjPosition Instrument 1 Sample IRM Calibration Status Some Ions Missed  
 Data Filename KMR-02-94Aa.d ACQ Method ISOCRATIC.m Comment Acquired Time 1/24/2022 4:35:05 PM

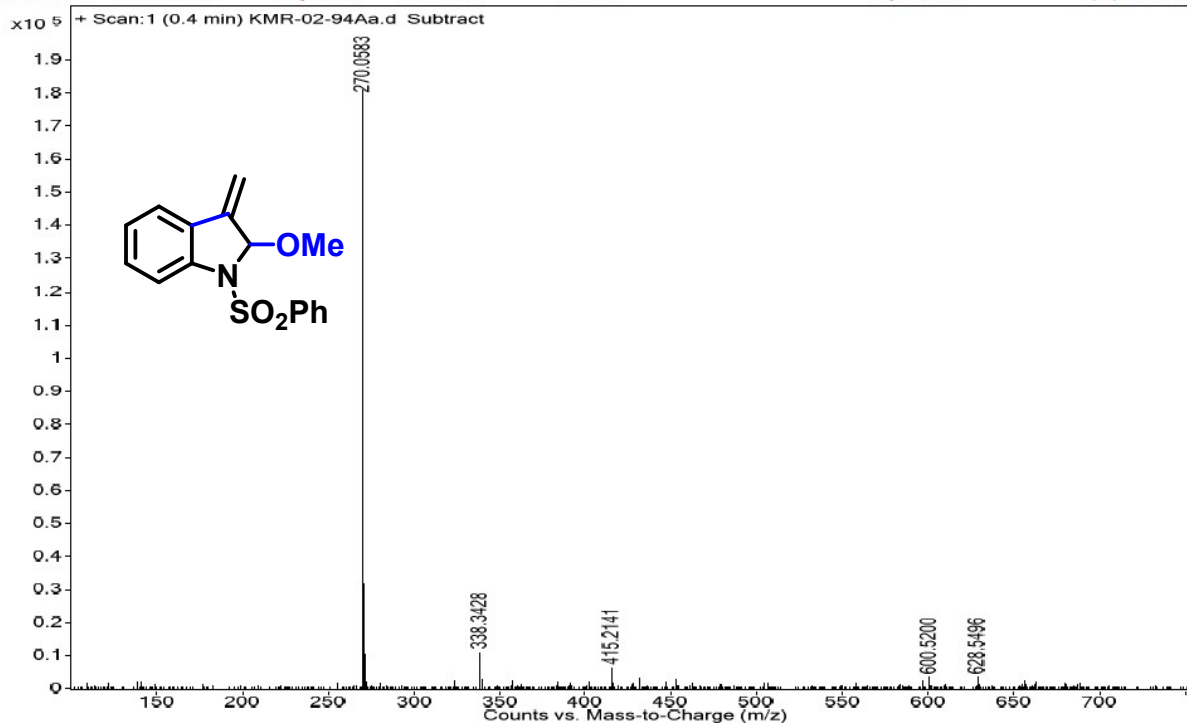

Figure S-66: HRMS spectrum of compound 31

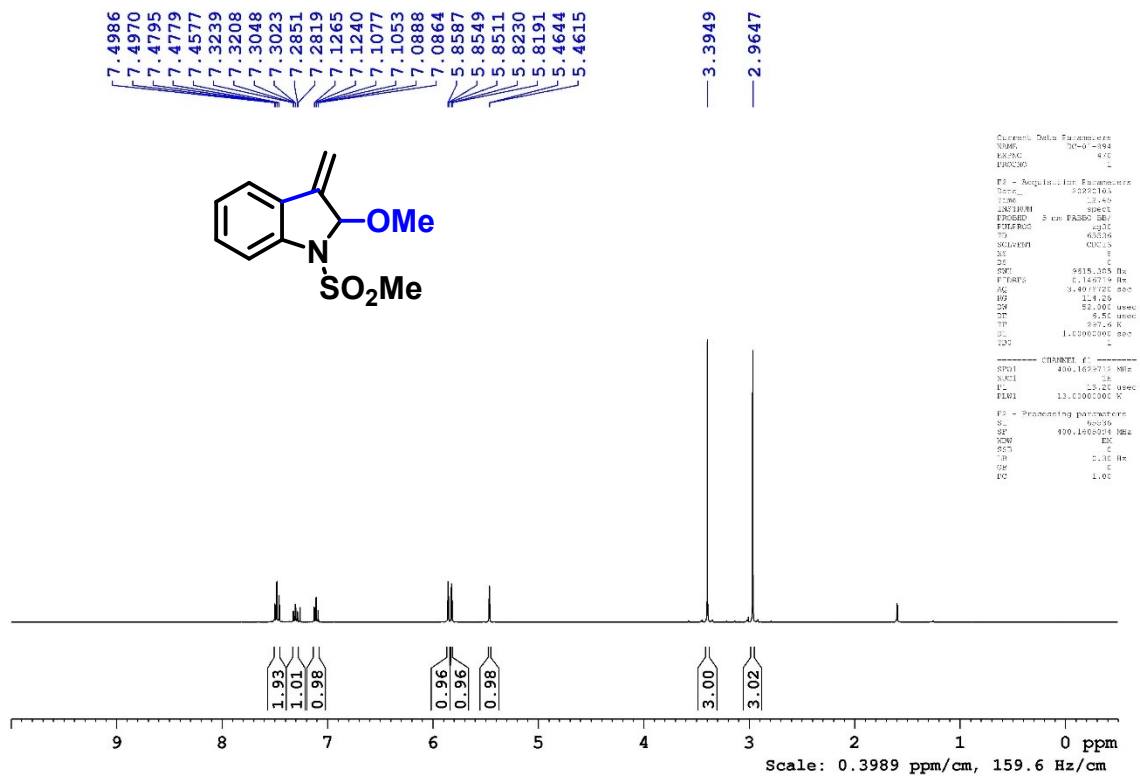

Figure S-67: <sup>1</sup>H NMR (400 MHz, CDCl<sub>3</sub>) spectrum of compound 3m

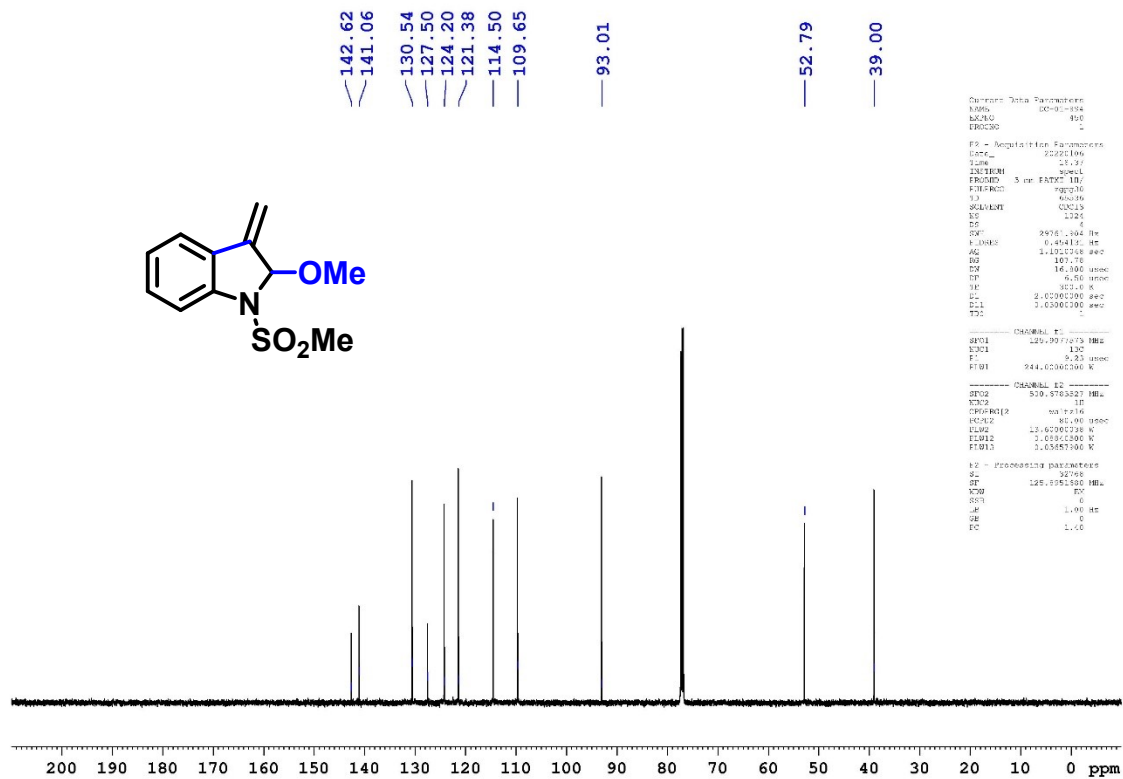

Figure S-68: <sup>13</sup>C NMR (125 MHz, CDCl<sub>3</sub>) spectrum of compound 3m

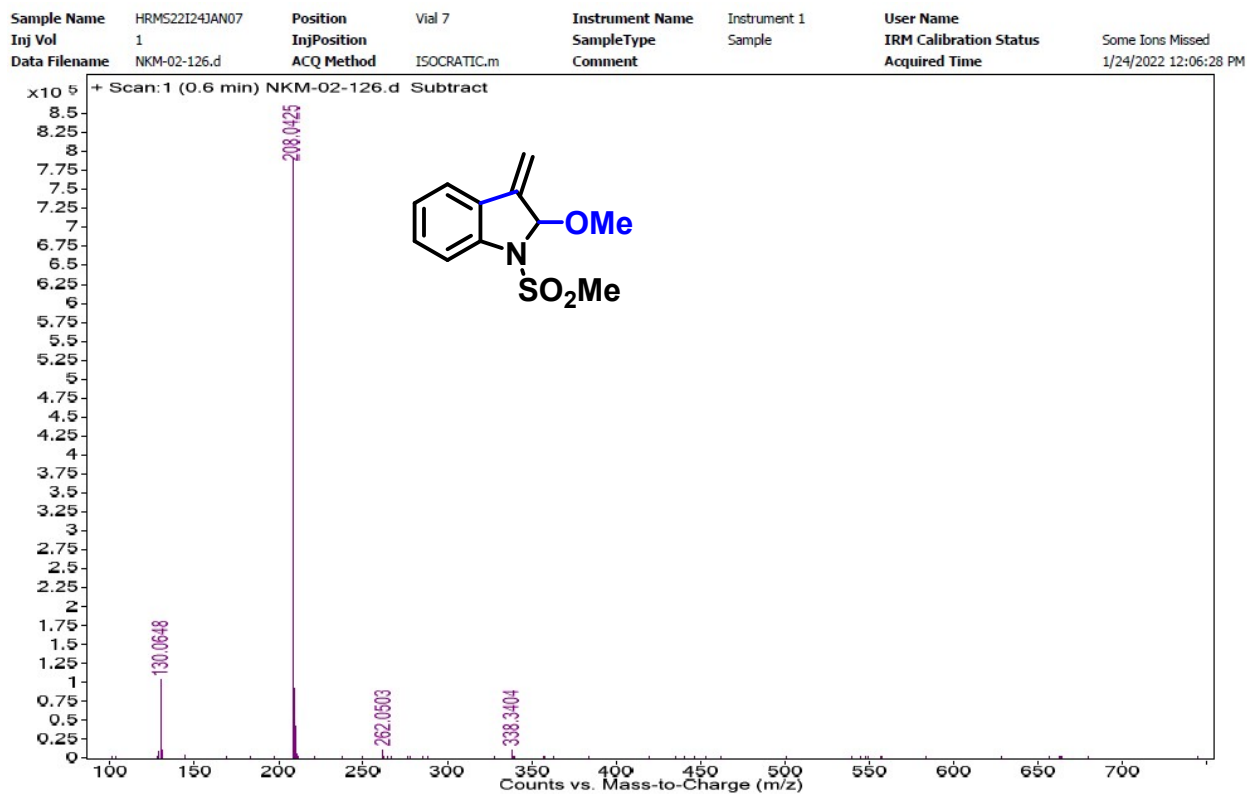

Figure S-69: HRMS spectrum of compound 3m



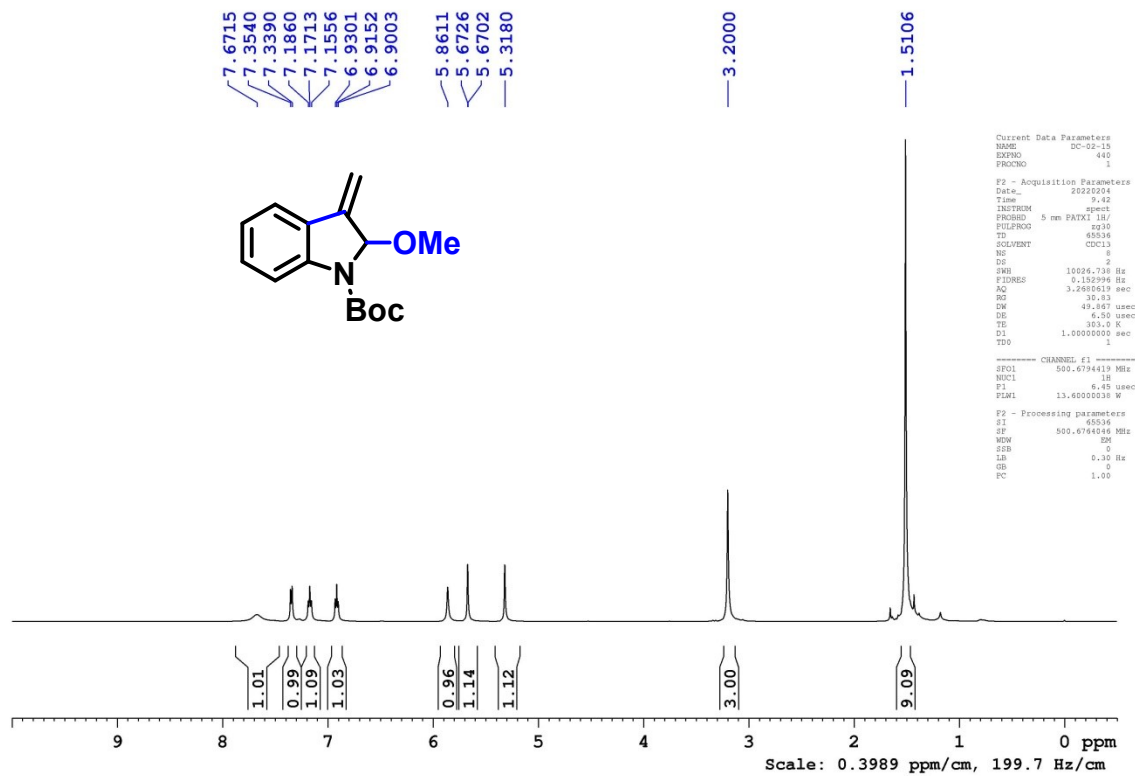

Figure S-70:  $^1\text{H}$  NMR (500 MHz,  $\text{CDCl}_3$ ) spectrum of compound **3n**

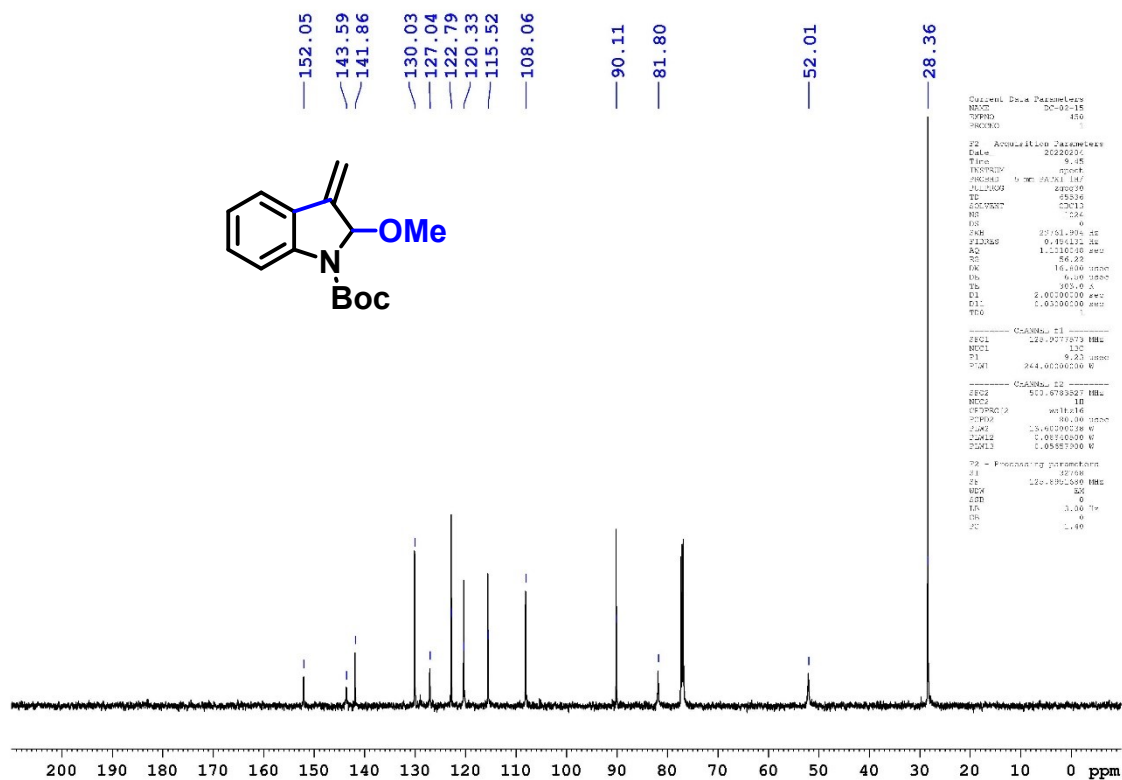

Figure S-71:  $^{13}\text{C}$  NMR (125 MHz,  $\text{CDCl}_3$ ) spectrum of compound **3n**

|               |                |             |             |                 |              |                        |                      |
|---------------|----------------|-------------|-------------|-----------------|--------------|------------------------|----------------------|
| Sample Name   | HRMS22I07FEB18 | Position    | Vial 18     | Instrument Name | Instrument 1 | User Name              |                      |
| Inj Vol       | 1              | InjPosition |             | SampleType      | Sample       | IRM Calibration Status | Some Ions Missed     |
| Data Filename | KMR-02-97A.d   | ACQ Method  | ISOCRATIC.m | Comment         |              | Acquired Time          | 2/7/2022 12:30:37 PM |

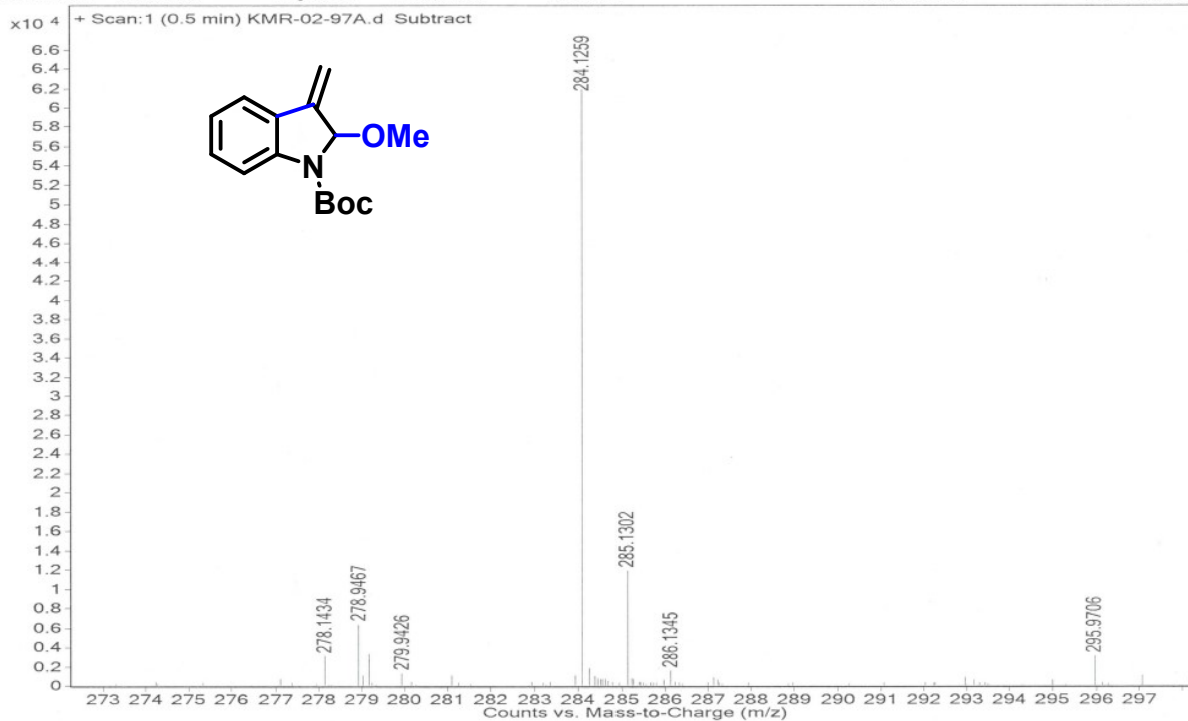

Figure S-72: HRMS spectrum of compound **3n**

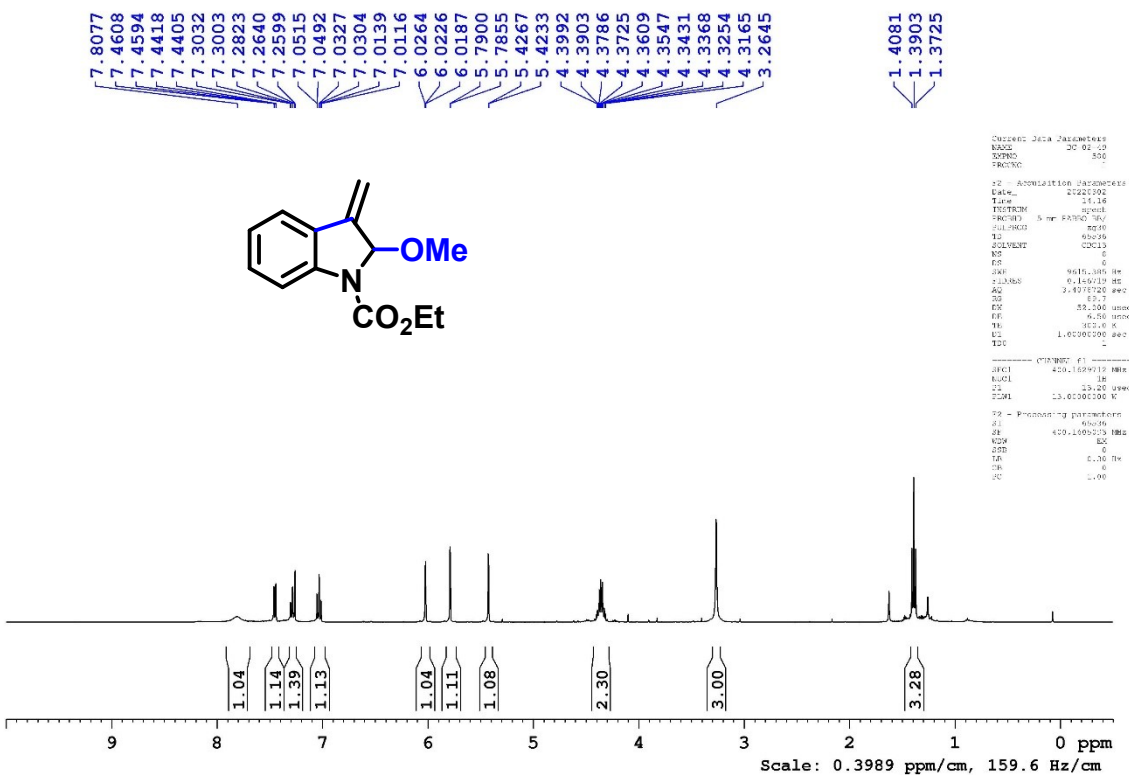

Figure S-73:  $^1\text{H}$  NMR (400 MHz,  $\text{CDCl}_3$ ) spectrum of compound **3o**

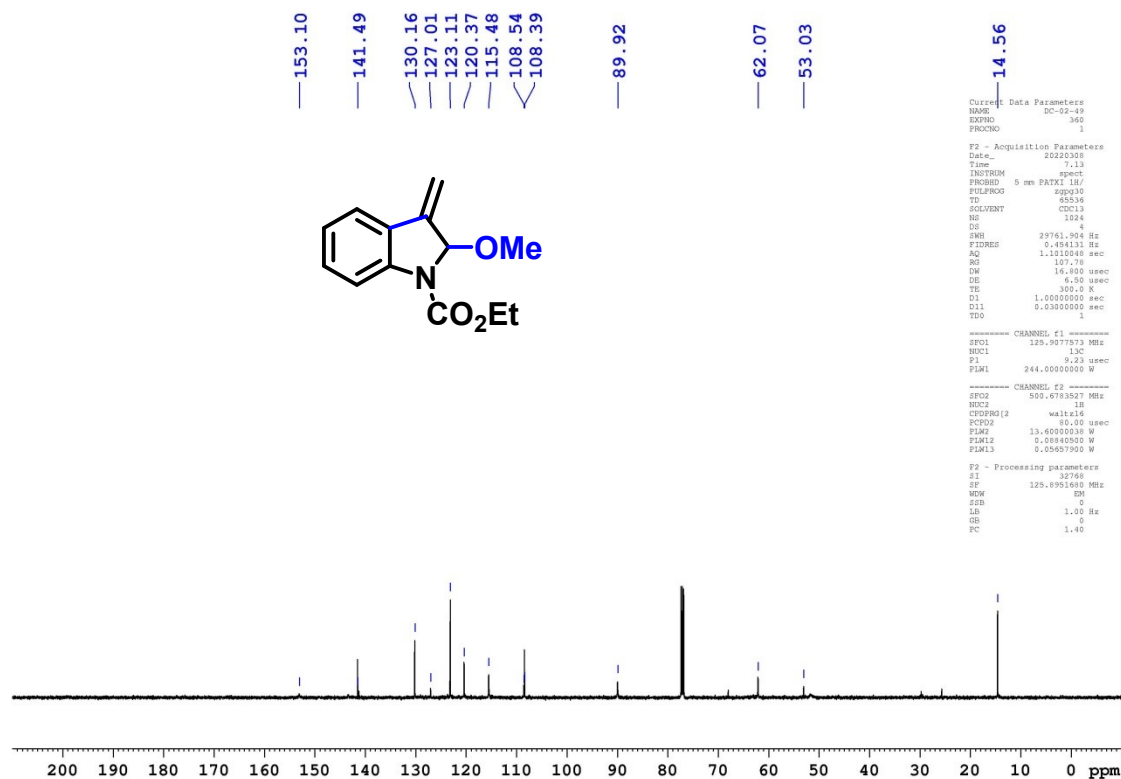

Figure S-74:  $^{13}\text{C}$  NMR (100 MHz,  $\text{CDCl}_3$ ) spectrum of compound 30

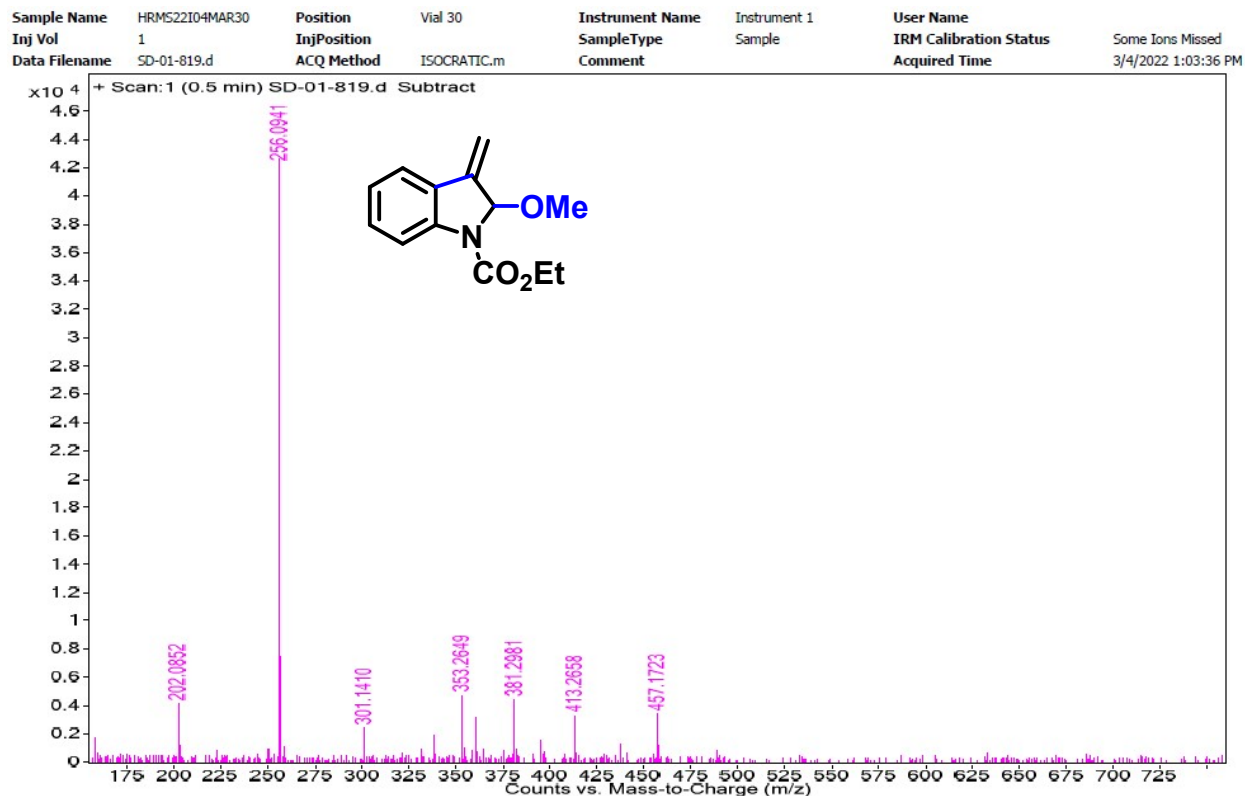

Figure S-75: HRMS spectrum of compound 30

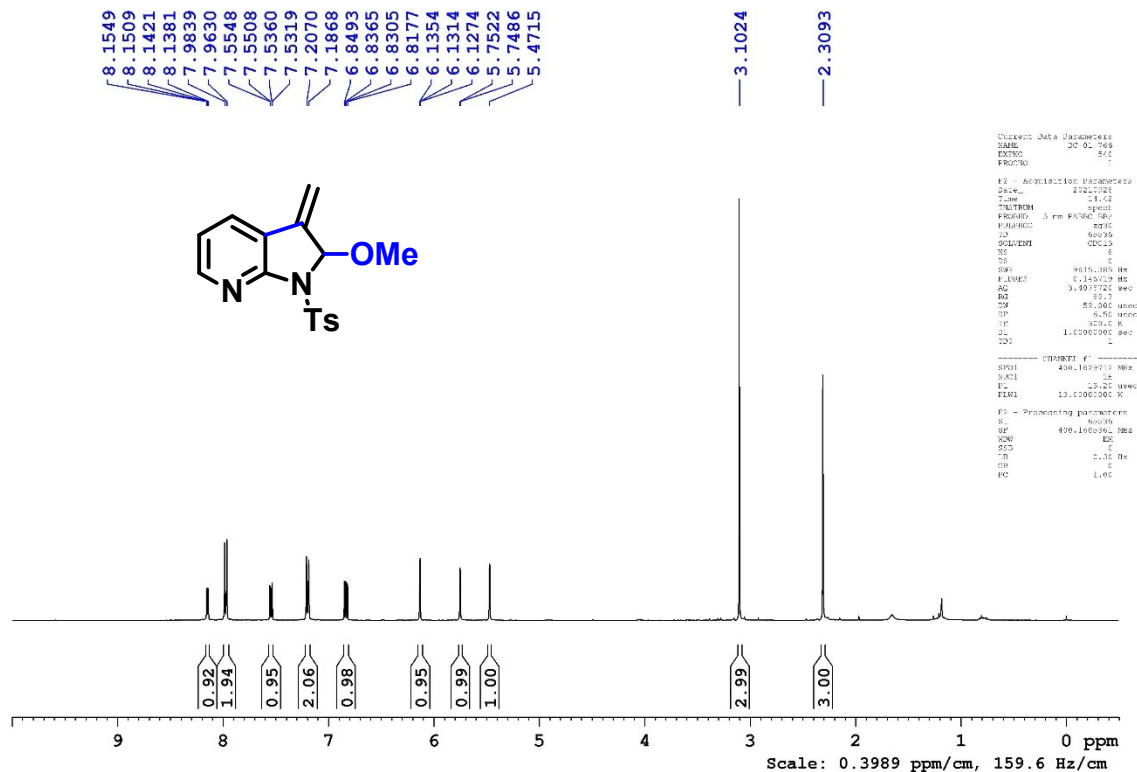

Figure S-76: <sup>1</sup>H NMR (400 MHz, CDCl<sub>3</sub>) spectrum of compound 3p

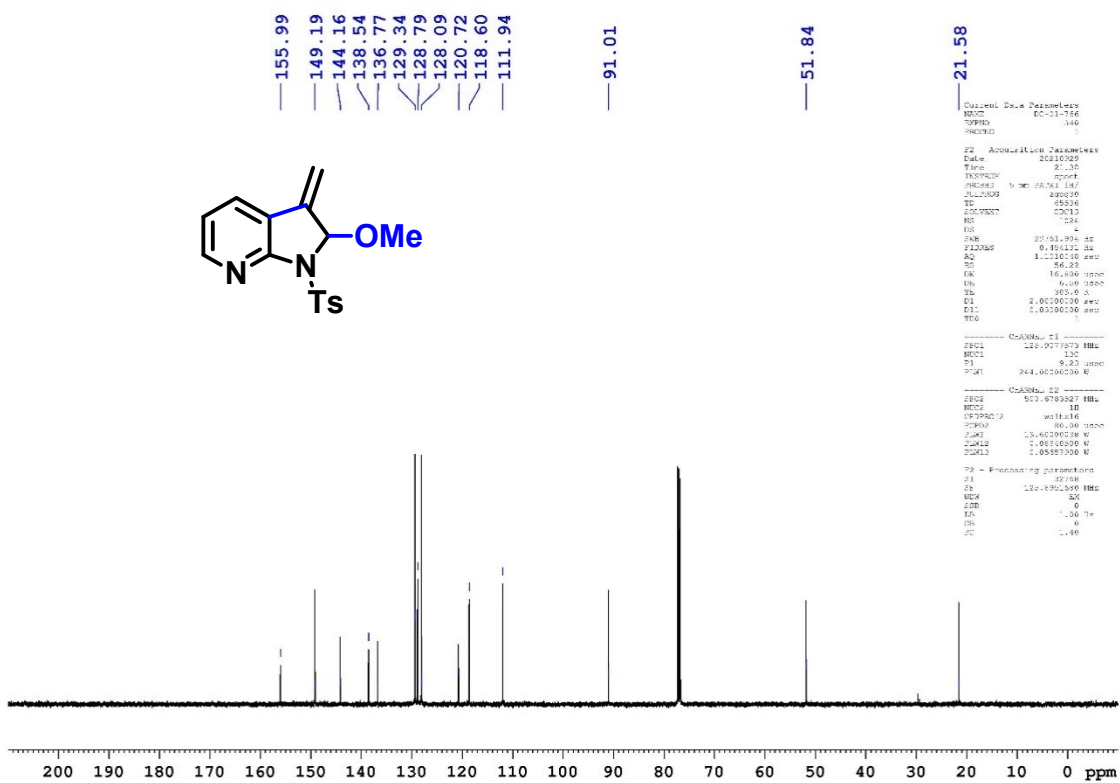

Figure S-77: <sup>13</sup>C NMR (125 MHz, CDCl<sub>3</sub>) spectrum of compound 3p

|               |                |             |             |                 |              |                        |                       |
|---------------|----------------|-------------|-------------|-----------------|--------------|------------------------|-----------------------|
| Sample Name   | HRMS22I24JAN21 | Position    | Vial 21     | Instrument Name | Instrument 1 | User Name              |                       |
| Inj Vol       | 1              | InjPosition |             | SampleType      | Sample       | IRM Calibration Status | Some Ions Missed      |
| Data Filename | KM-CY-P.d      | ACQ Method  | ISOCRATIC.m | Comment         |              | Acquired Time          | 1/24/2022 12:50:03 PM |

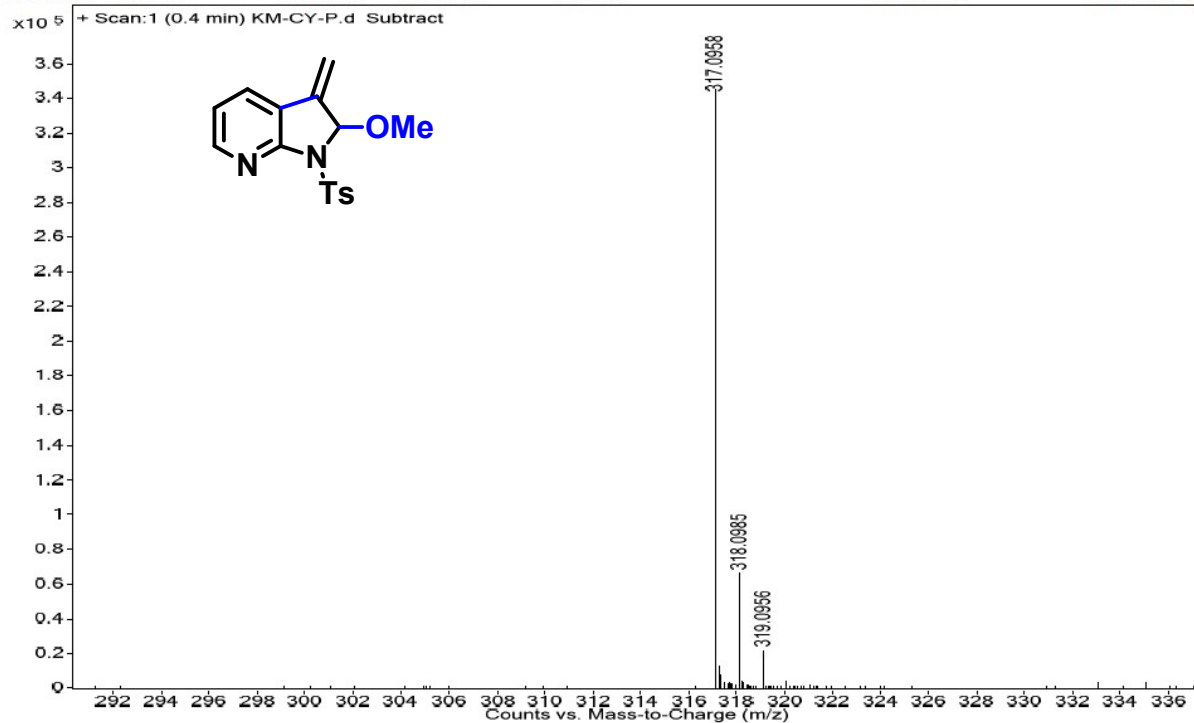

Figure S-78: HRMS spectrum of compound **3p**

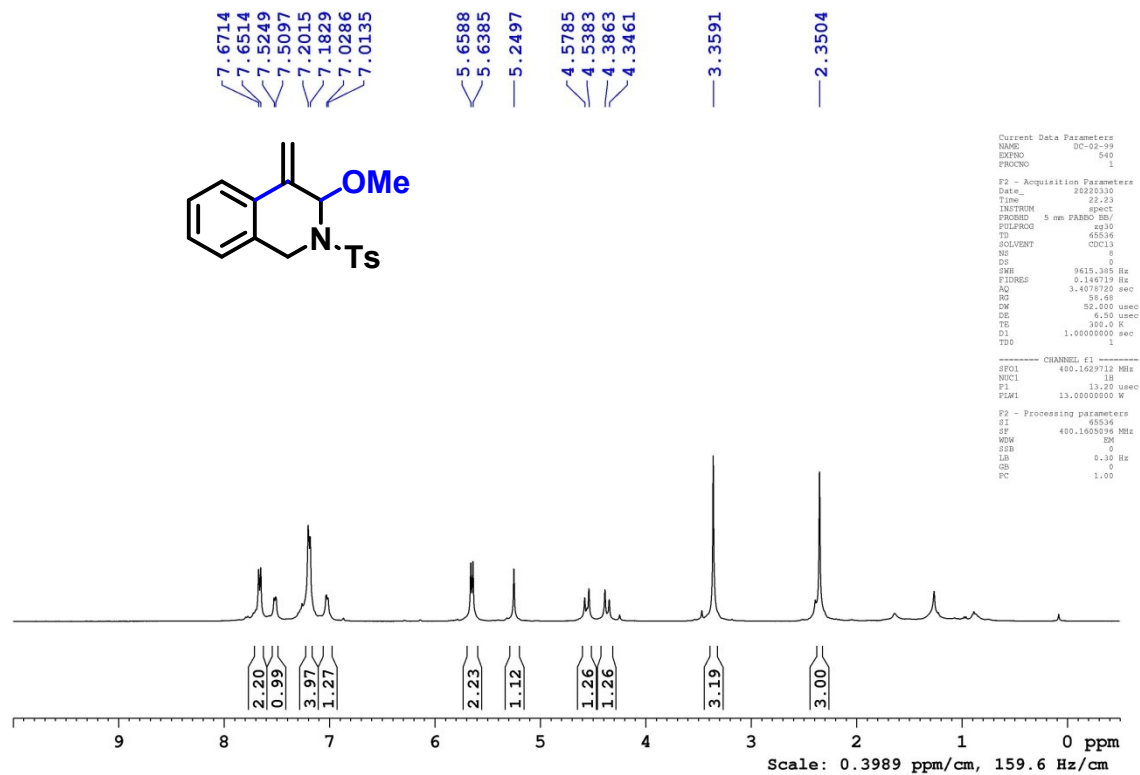

Figure S-79:  $^1\text{H}$  NMR (400 MHz,  $\text{CDCl}_3$ ) spectrum of compound **3q**

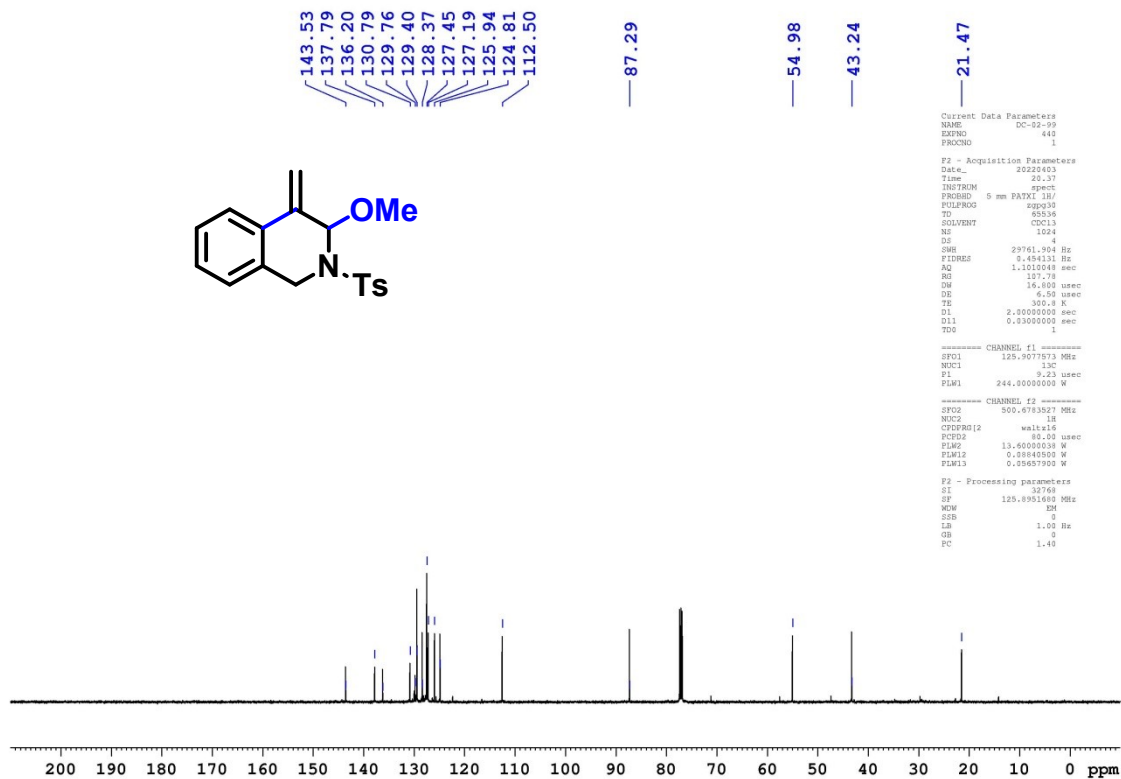

Figure S-80:  $^{13}\text{C}$  NMR (125 MHz,  $\text{CDCl}_3$ ) spectrum of compound 3q

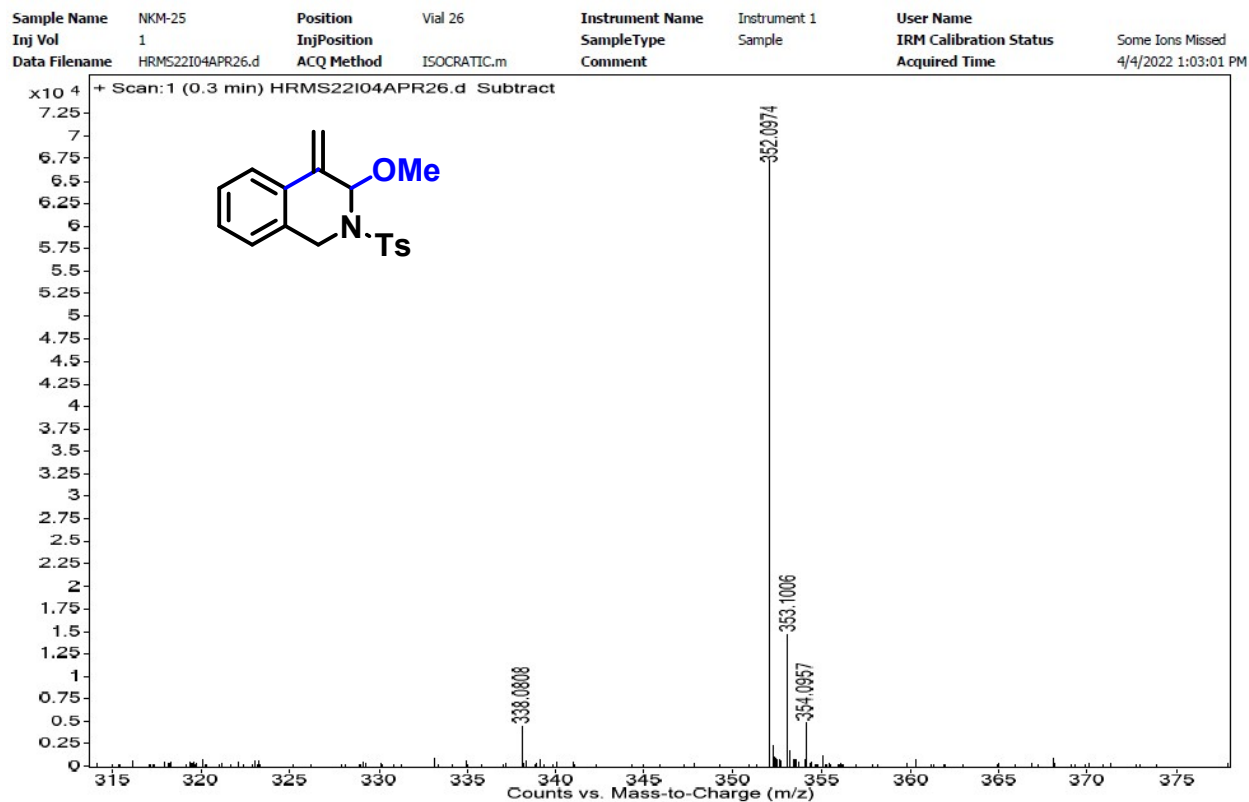

Figure S-81: HRMS spectrum of compound 3q

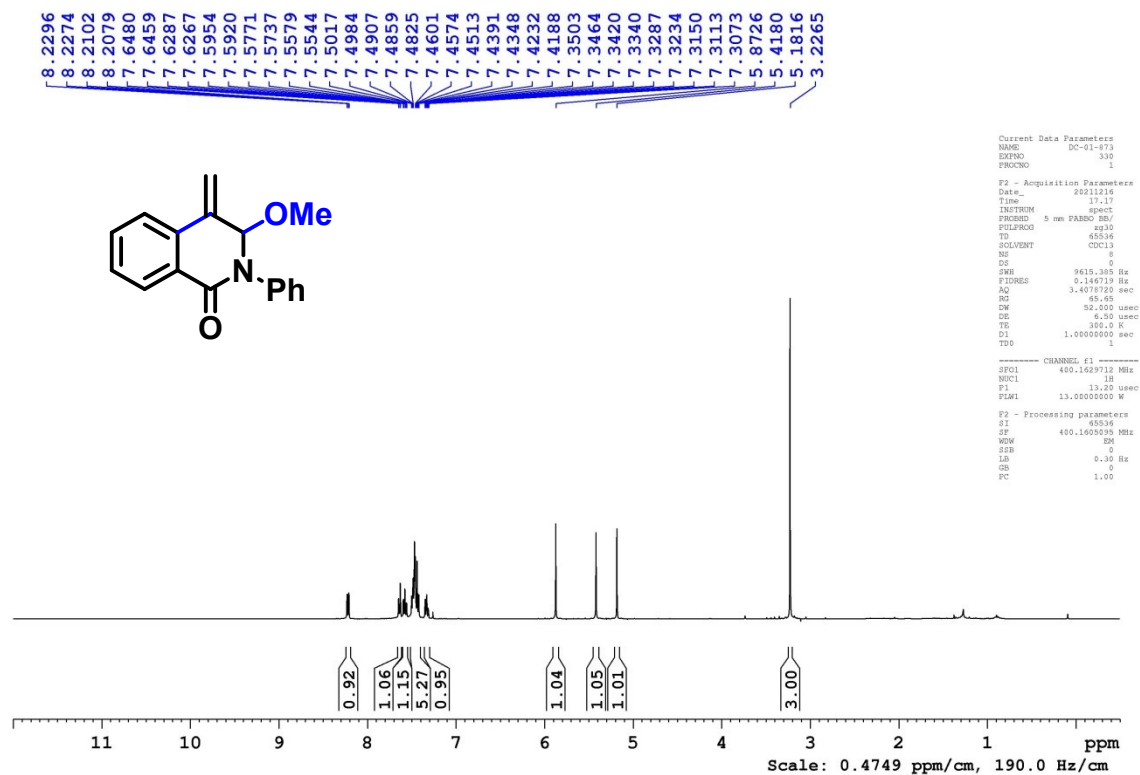

Figure S-82:  $^1\text{H}$  NMR (400 MHz,  $\text{CDCl}_3$ ) spectrum of compound **3r**

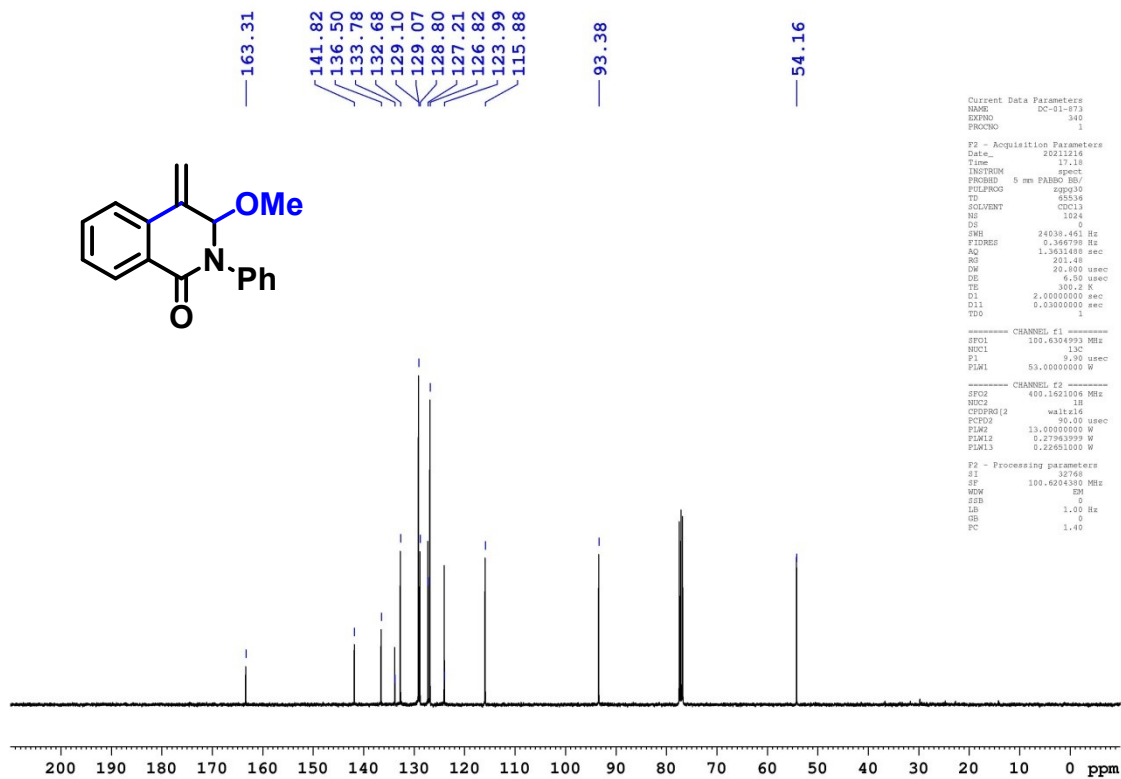

Figure S-83:  $^{13}\text{C}$  NMR (100 MHz,  $\text{CDCl}_3$ ) spectrum of compound **3r**

| Sample Name   | HRMS22118JAN17 | Position    | Vial 17     | Instrument Name | Instrument 1 | User Name              |                       |
|---------------|----------------|-------------|-------------|-----------------|--------------|------------------------|-----------------------|
| Inj Vol       | 1              | InjPosition |             | SampleType      | Sample       | IRM Calibration Status | Some Ions Missed      |
| Data Filename | DC-01-903.d    | ACQ Method  | ISOCRATIC.m | Comment         |              | Acquired Time          | 1/18/2022 12:31:43 PM |

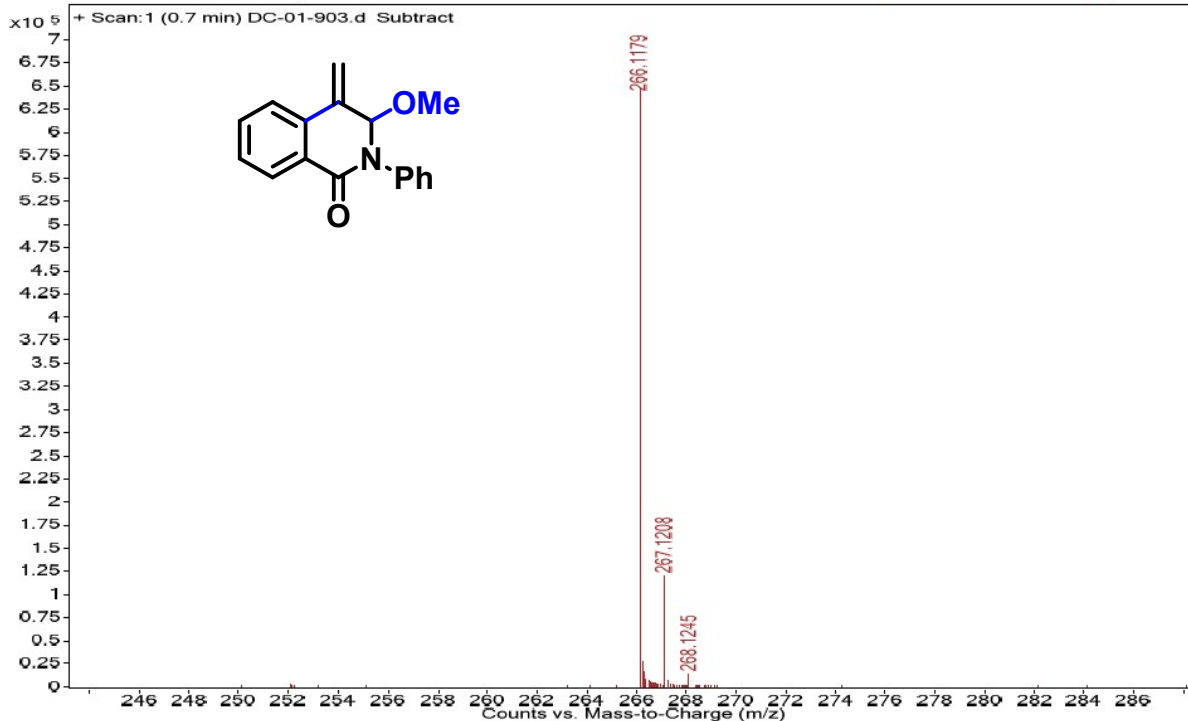

Figure S-84: HRMS spectrum of compound 3r

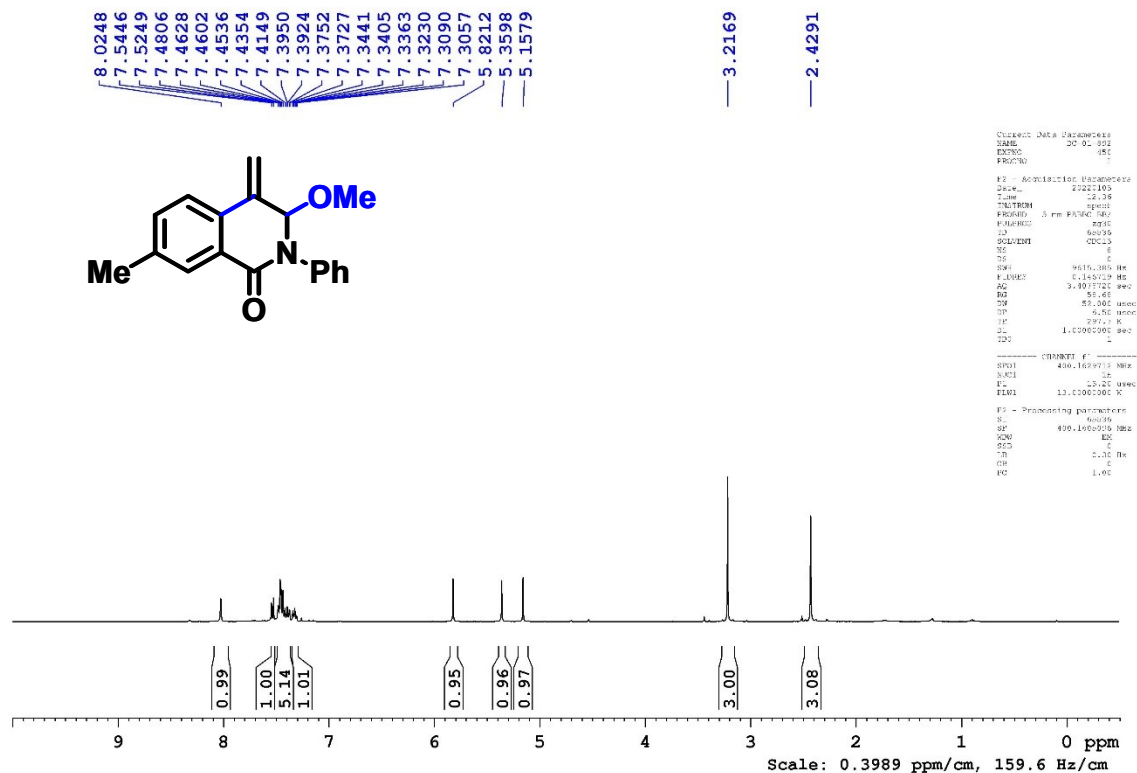

Figure S-85: <sup>1</sup>H NMR (400 MHz, CDCl<sub>3</sub>) spectrum of compound 3s



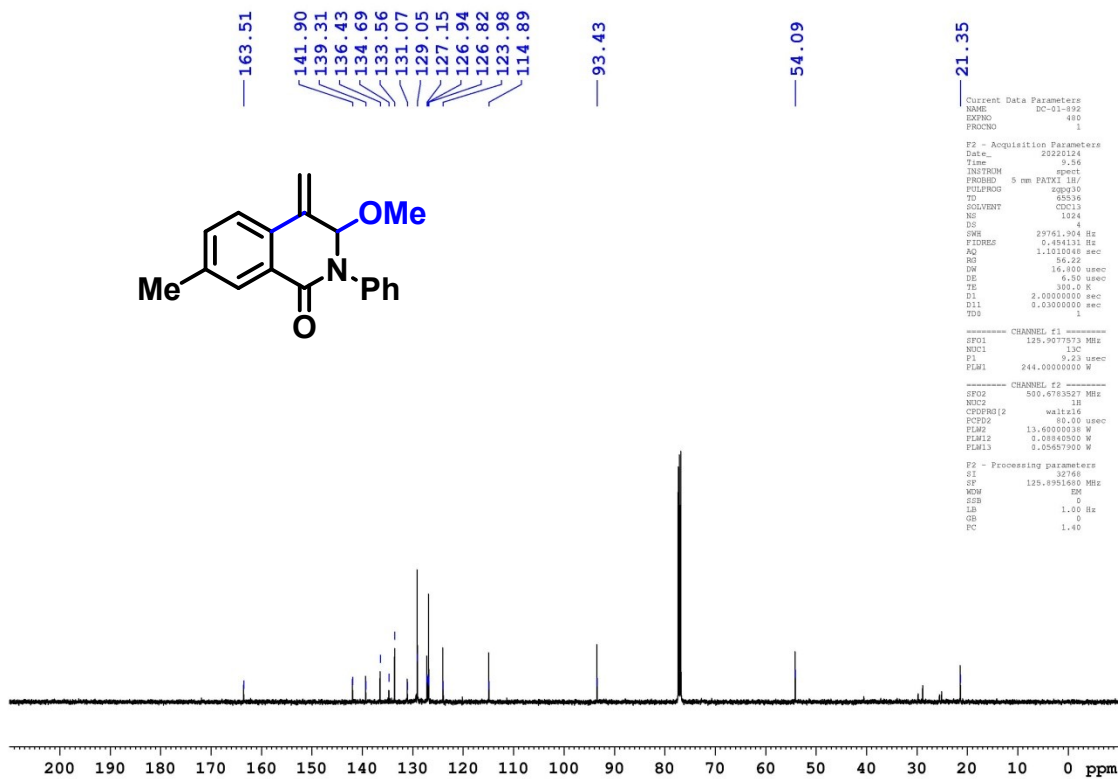

Figure S-86:  $^{13}\text{C}$  NMR (125 MHz,  $\text{CDCl}_3$ ) spectrum of compound 3s

| Sample Name   | HRMS22I18JAN18 | Position    | Vial 18     | Instrument Name | Instrument 1 | User Name              |                       |
|---------------|----------------|-------------|-------------|-----------------|--------------|------------------------|-----------------------|
| Inj Vol       | 1              | InjPosition |             | SampleType      | Sample       | IRM Calibration Status | Some Ions Missed      |
| Data Filename | DC-01-898.d    | ACQ Method  | ISOCRATIC.m | Comment         |              | Acquired Time          | 1/18/2022 12:34:51 PM |

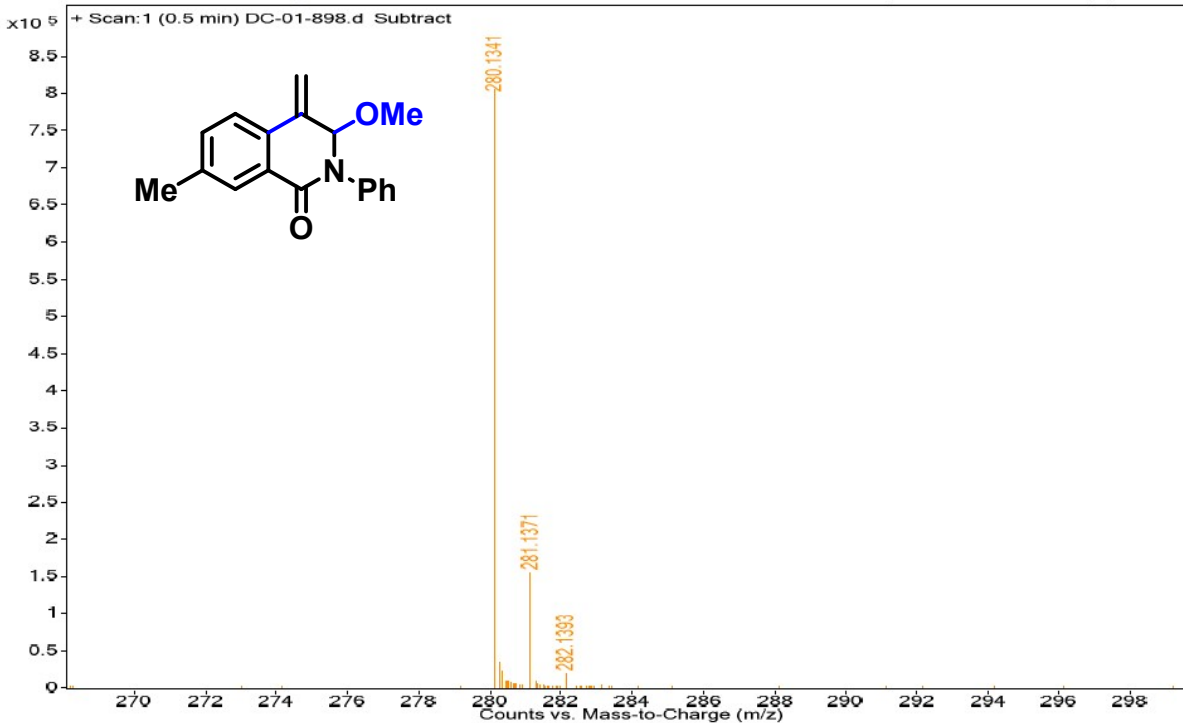

Figure S-87: HRMS spectrum of compound 3s

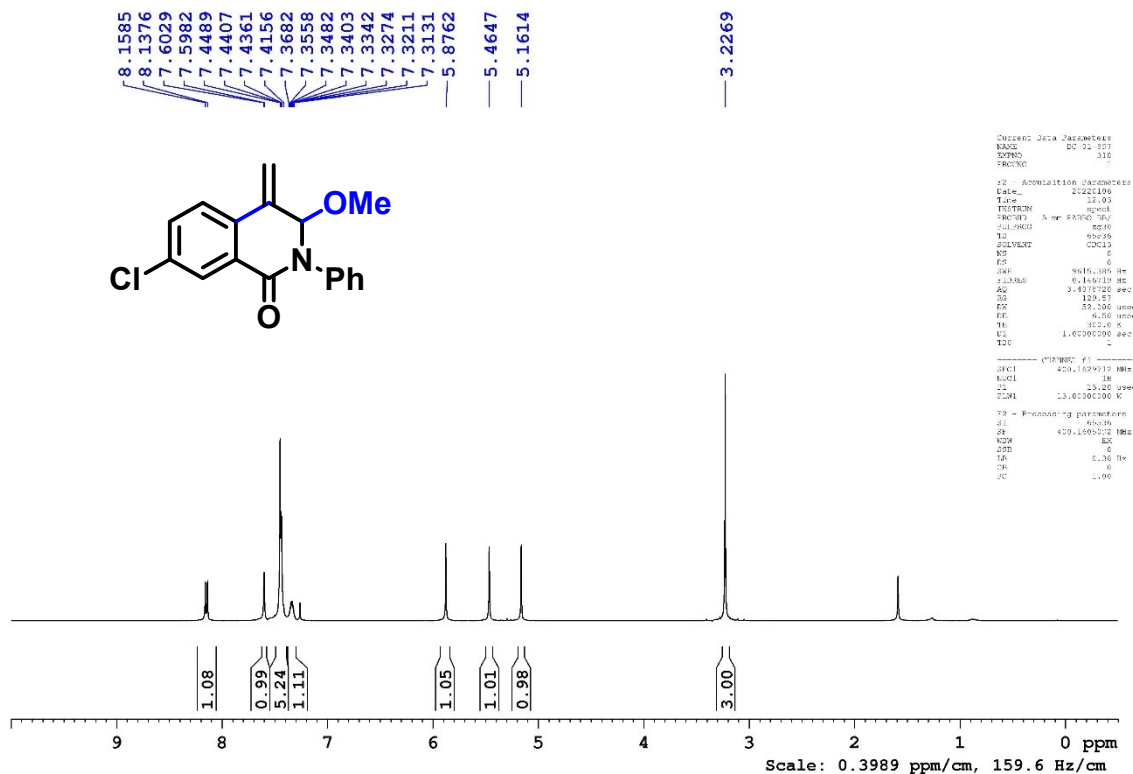

Figure S-88: <sup>1</sup>H NMR (400 MHz, CDCl<sub>3</sub>) spectrum of compound 3t

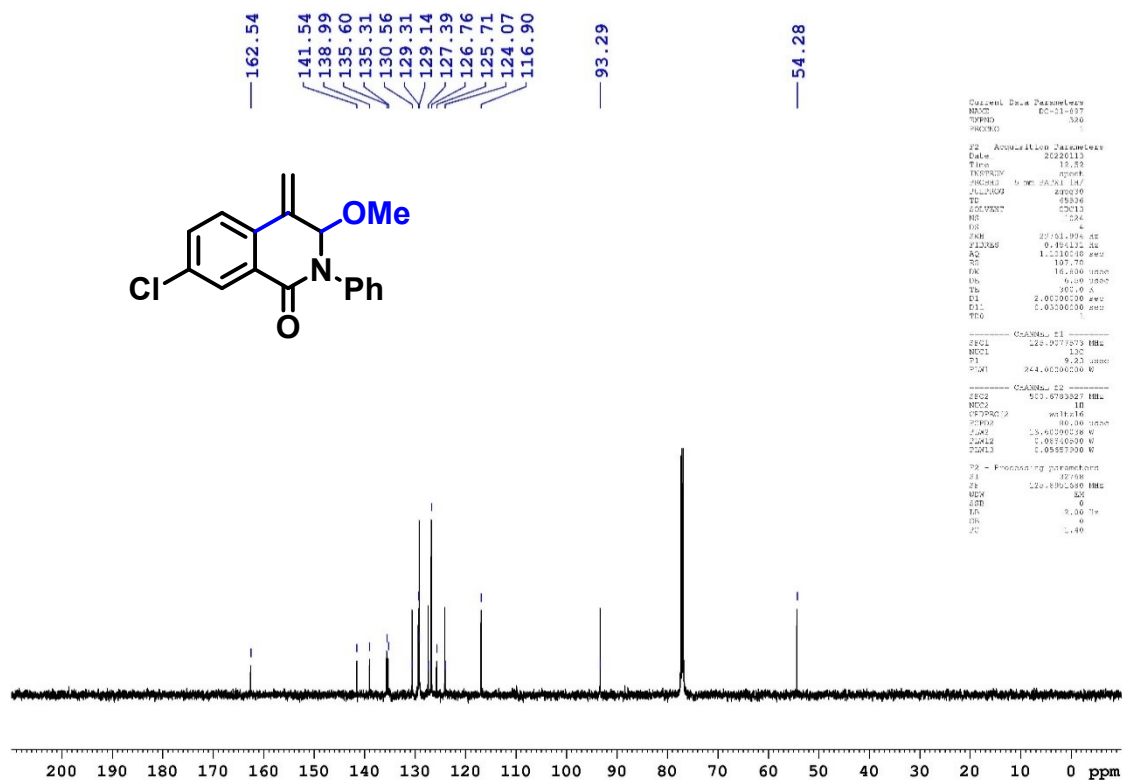

Figure S-89: <sup>13</sup>C NMR (125 MHz, CDCl<sub>3</sub>) spectrum of compound 3t

|               |                |             |             |                 |              |                        |                       |
|---------------|----------------|-------------|-------------|-----------------|--------------|------------------------|-----------------------|
| Sample Name   | HRMS22119JAN11 | Position    | Vial 11     | Instrument Name | Instrument 1 | User Name              |                       |
| Inj Vol       | 1              | InjPosition |             | SampleType      | Sample       | IRM Calibration Status | Some Ions Missed      |
| Data Filename | SD-01-763.d    | ACQ Method  | ISOCRATIC.m | Comment         |              | Acquired Time          | 1/19/2022 12:03:46 PM |

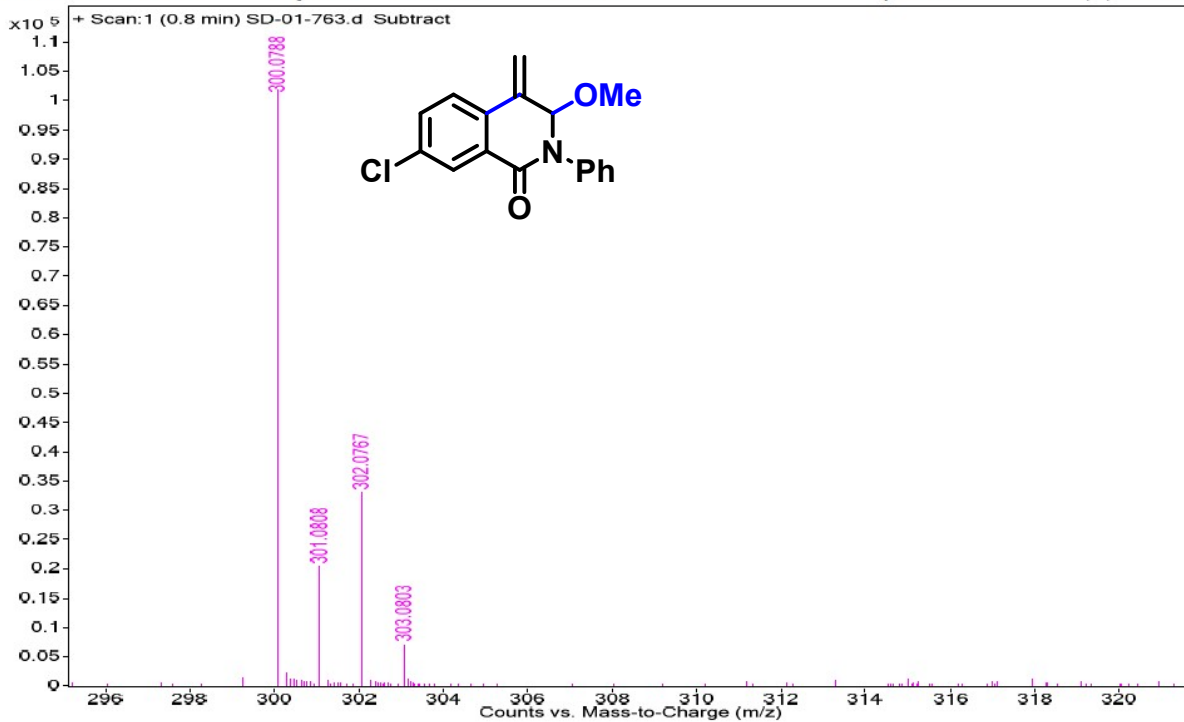

Figure S-90: HRMS spectrum of compound 3t

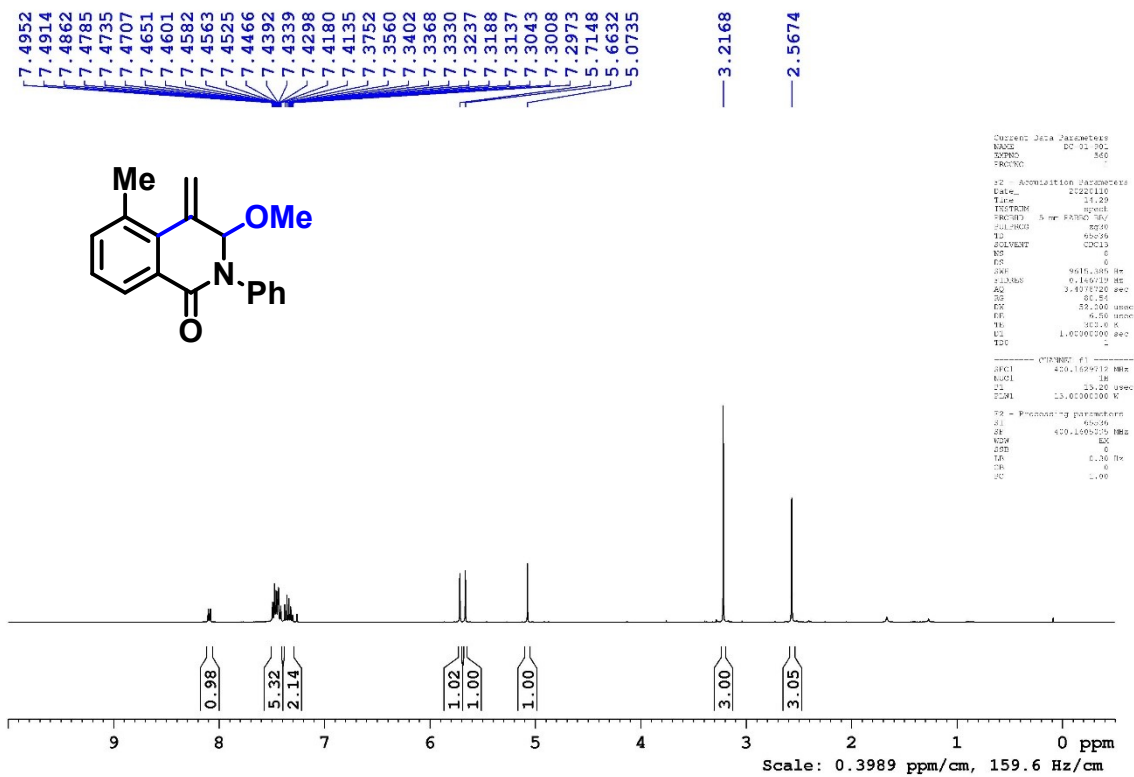

Figure S-91: <sup>1</sup>H NMR (400 MHz, CDCl<sub>3</sub>) spectrum of compound 3u

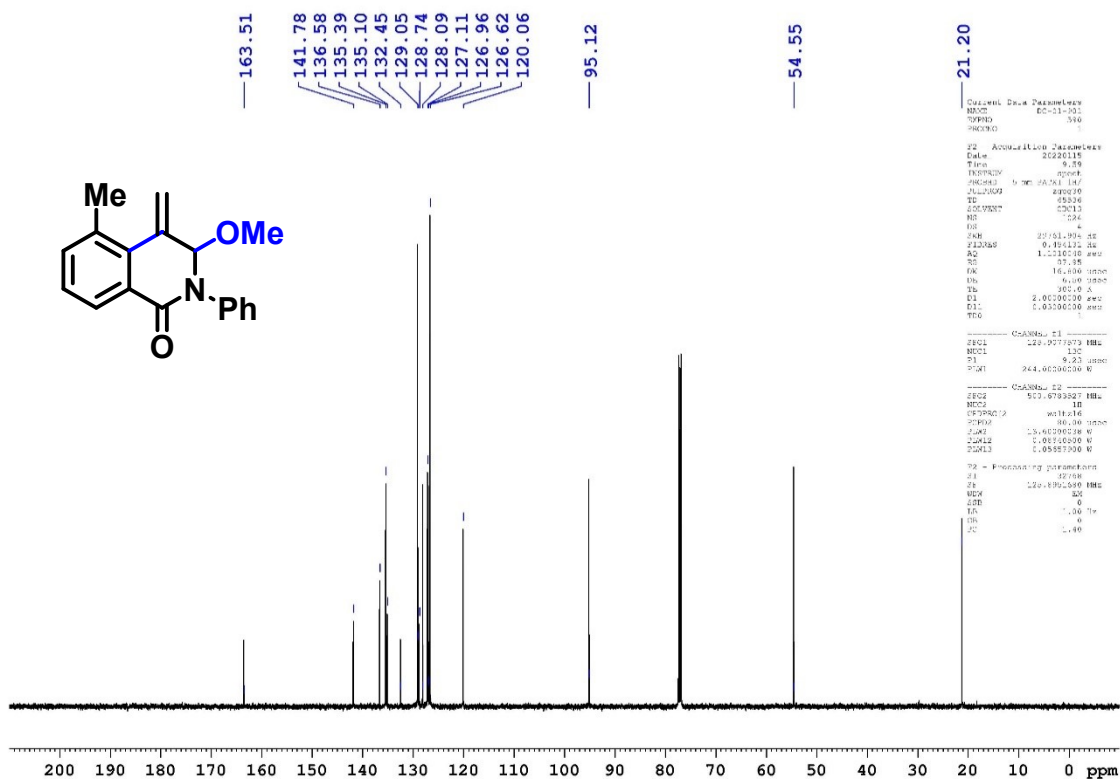

Figure S-92:  $^{13}\text{C}$  NMR (125 MHz,  $\text{CDCl}_3$ ) spectrum of compound 3u

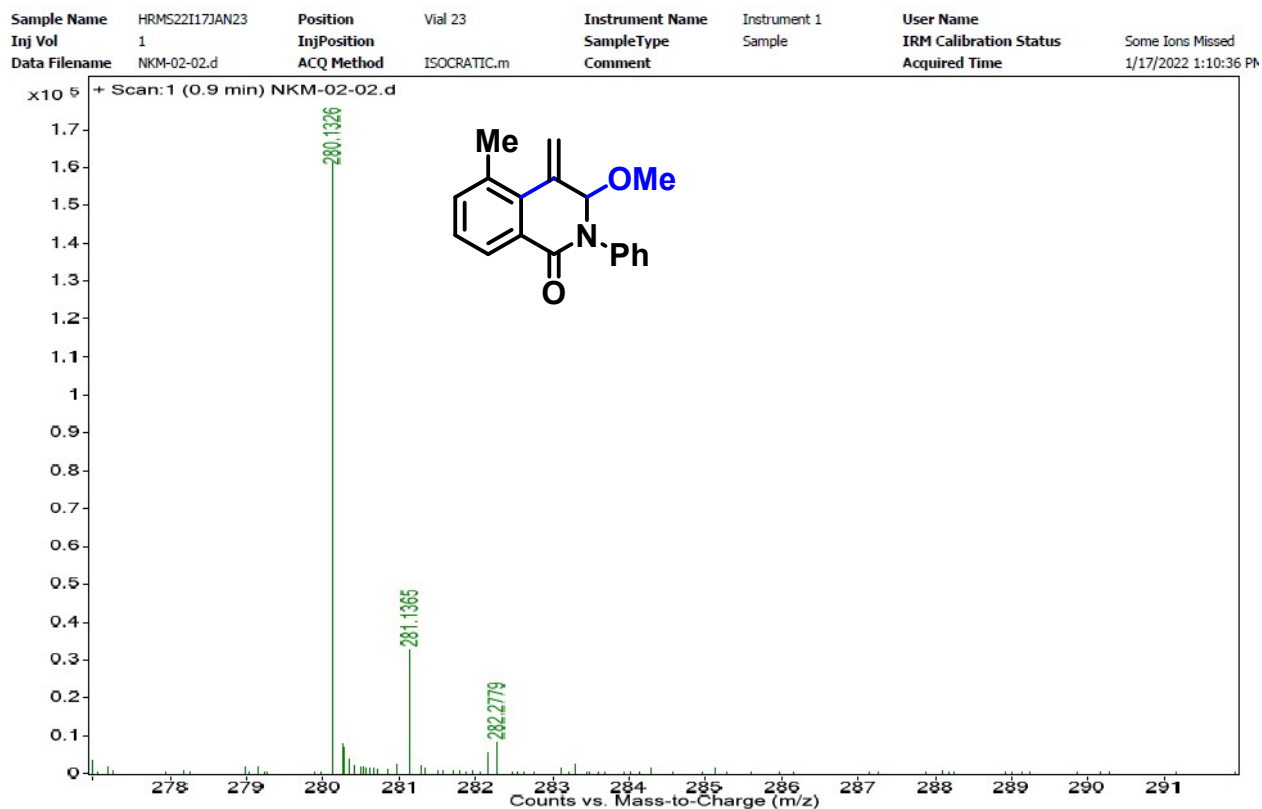

Figure S-93: HRMS spectrum of compound 3u

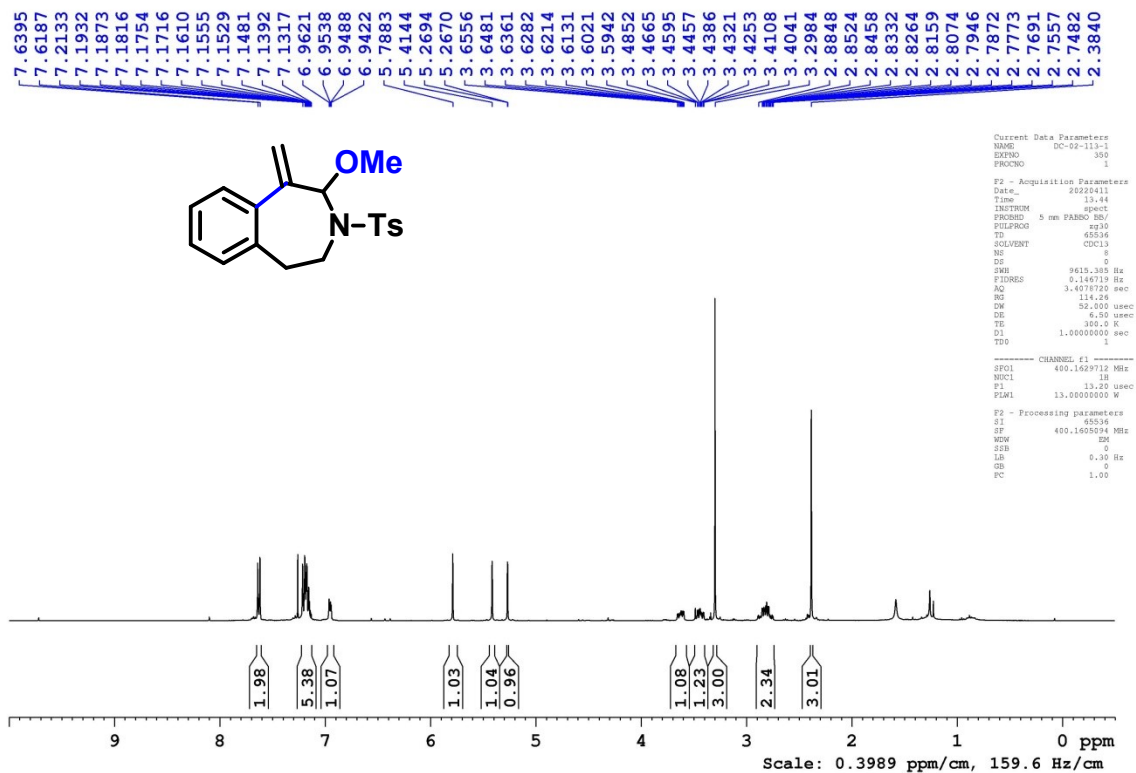

Figure S-94:  $^1\text{H}$  NMR (400 MHz,  $\text{CDCl}_3$ ) spectrum of compound 3v

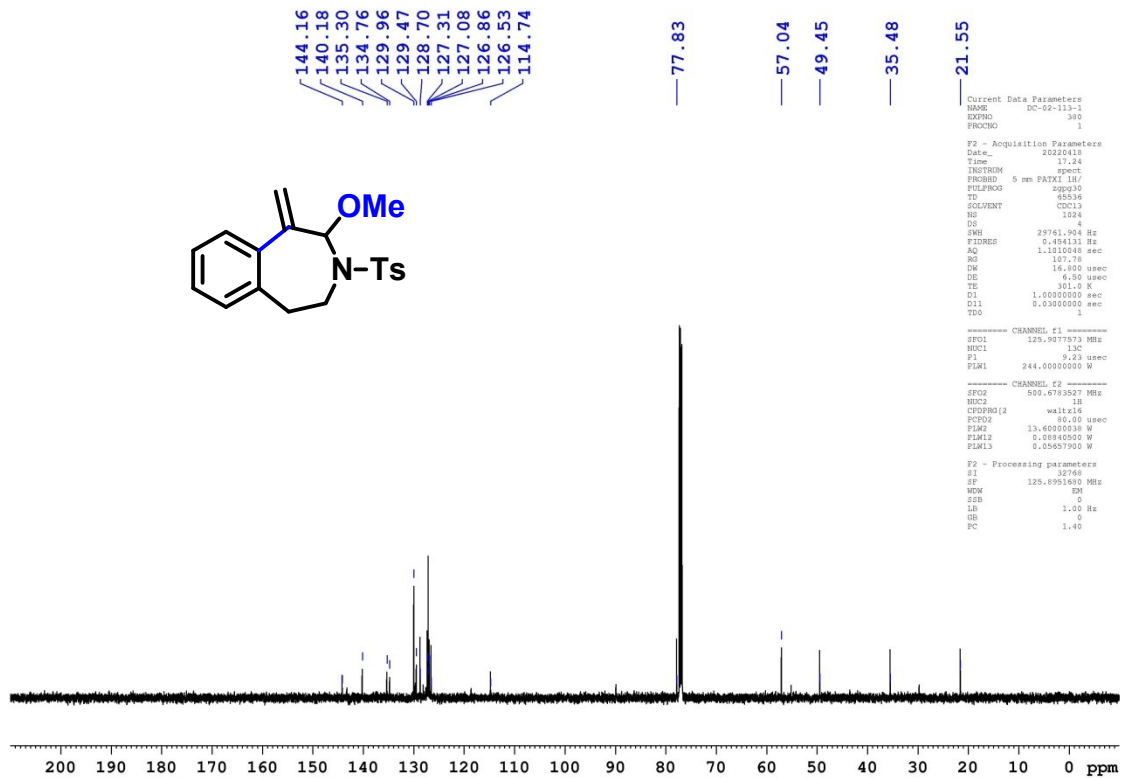

Figure S-95:  $^{13}\text{C}$  NMR (125 MHz,  $\text{CDCl}_3$ ) spectrum of compound 3v

Sample Name NKM-02-95 Position Vial 7 Instrument Name Instrument 1 User Name  
 Inj Vol 1 InjPosition SampleType Sample IRM Calibration Status Some Ions Missed  
 Data Filename HRMS22112APR07.d ACQ Method ISOCRATIC.m Comment Acquired Time 4/12/2022 12:54:18 PM

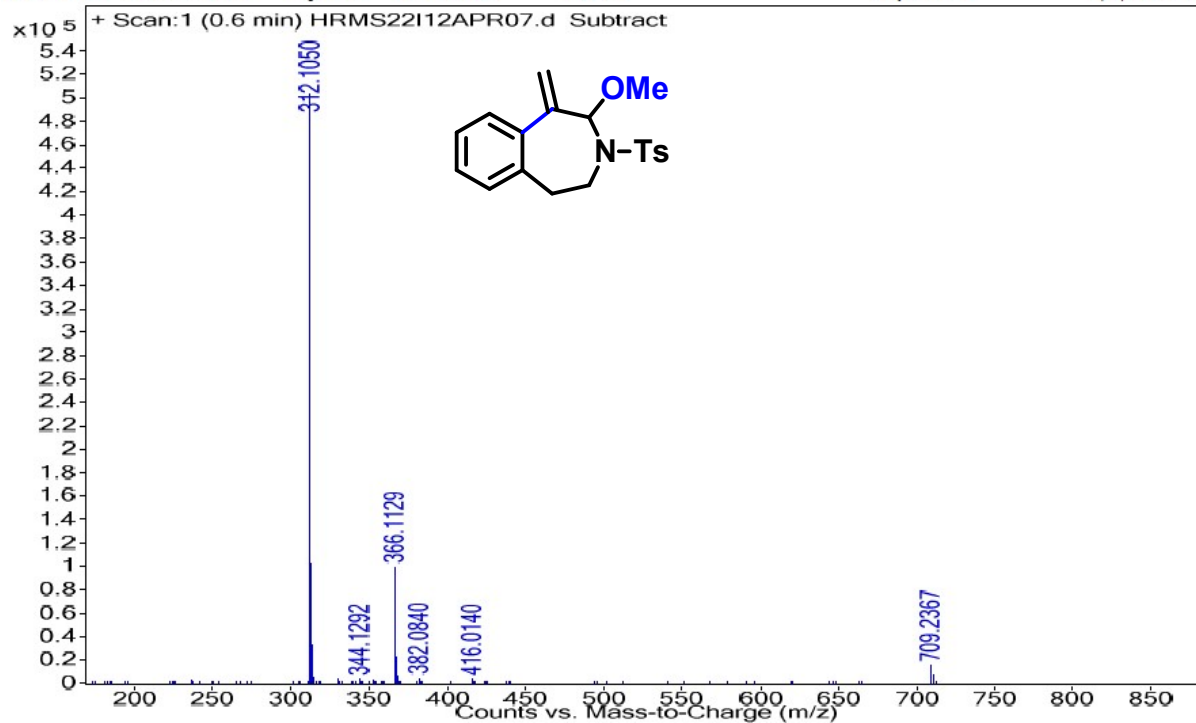

Figure S-96: HRMS spectrum of compound 3v

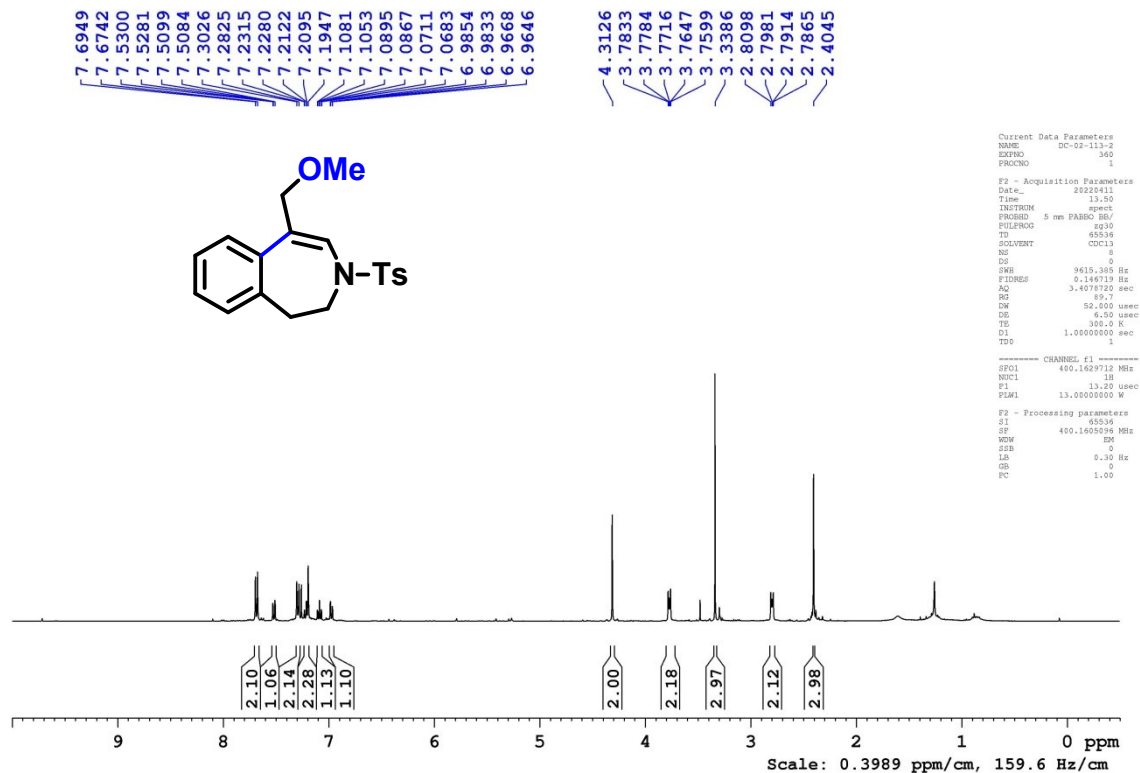

Figure S-97: <sup>1</sup>H NMR (400 MHz, CDCl<sub>3</sub>) spectrum of compound 4v

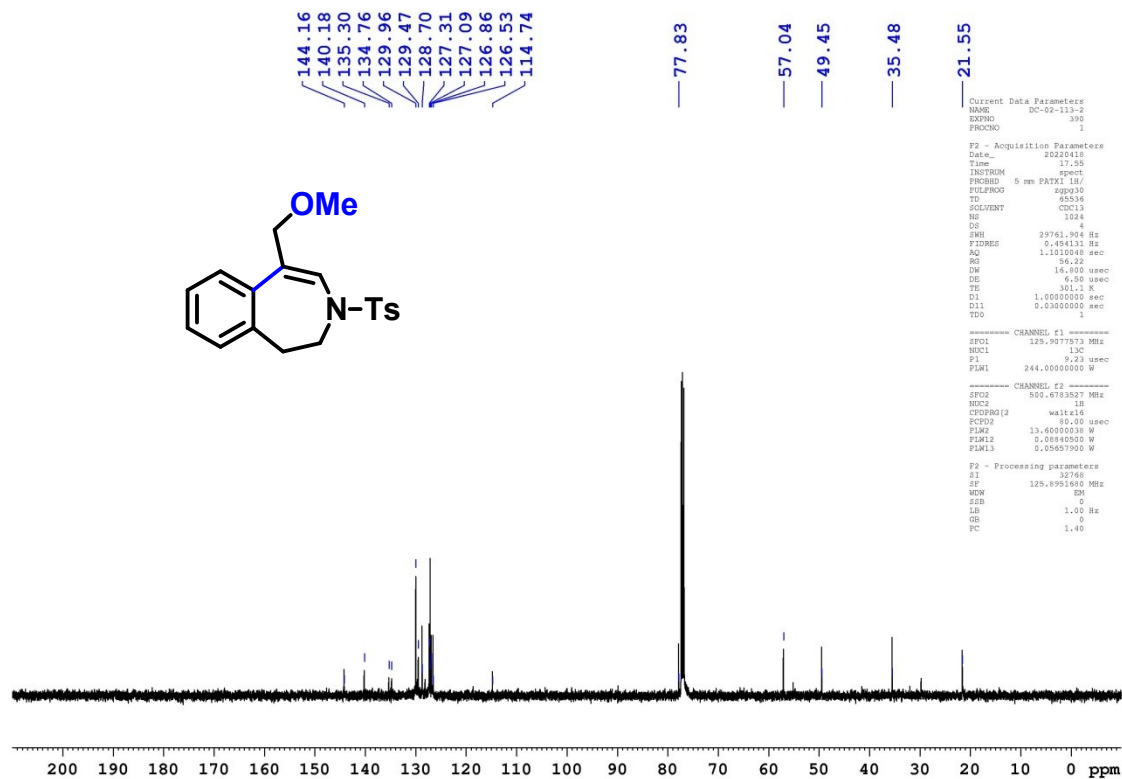

Figure S-98:  $^{13}\text{C}$  NMR (125 MHz,  $\text{CDCl}_3$ ) spectrum of compound 4v

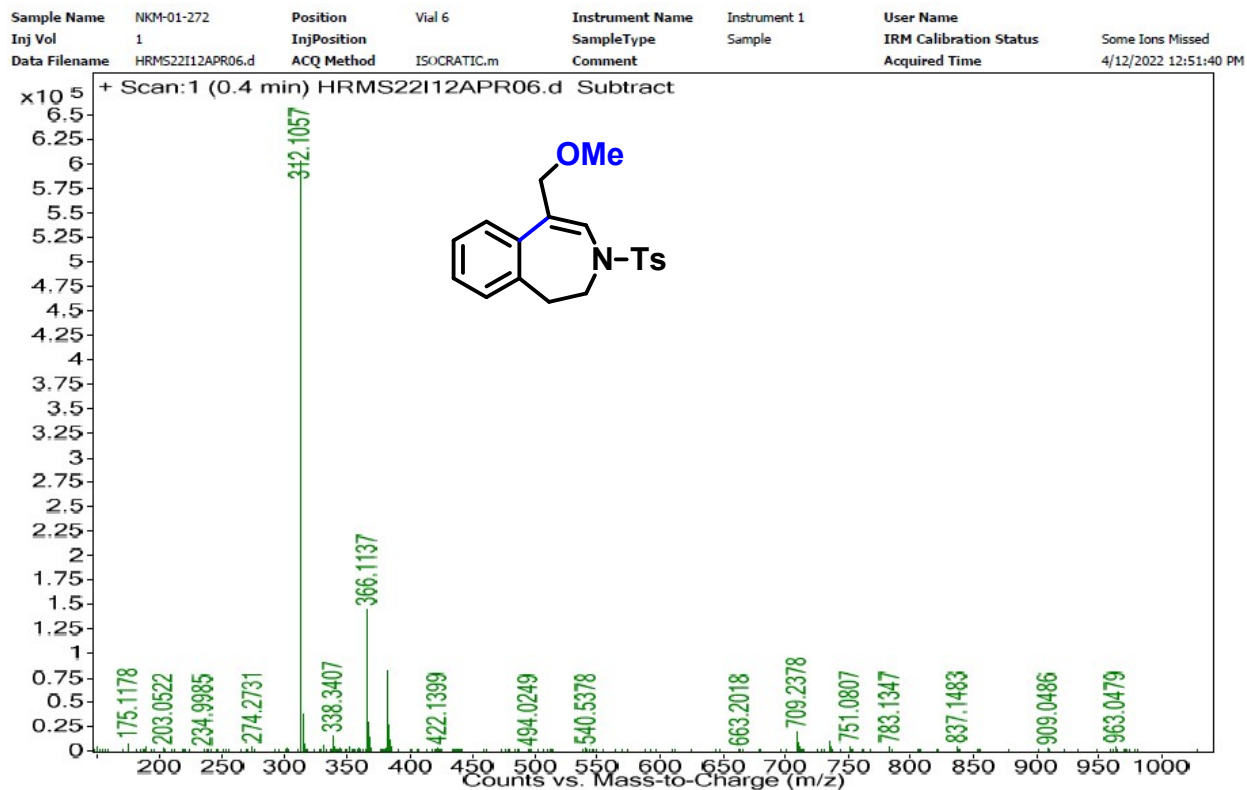

Figure S-99: HRMS spectrum of compound 4v

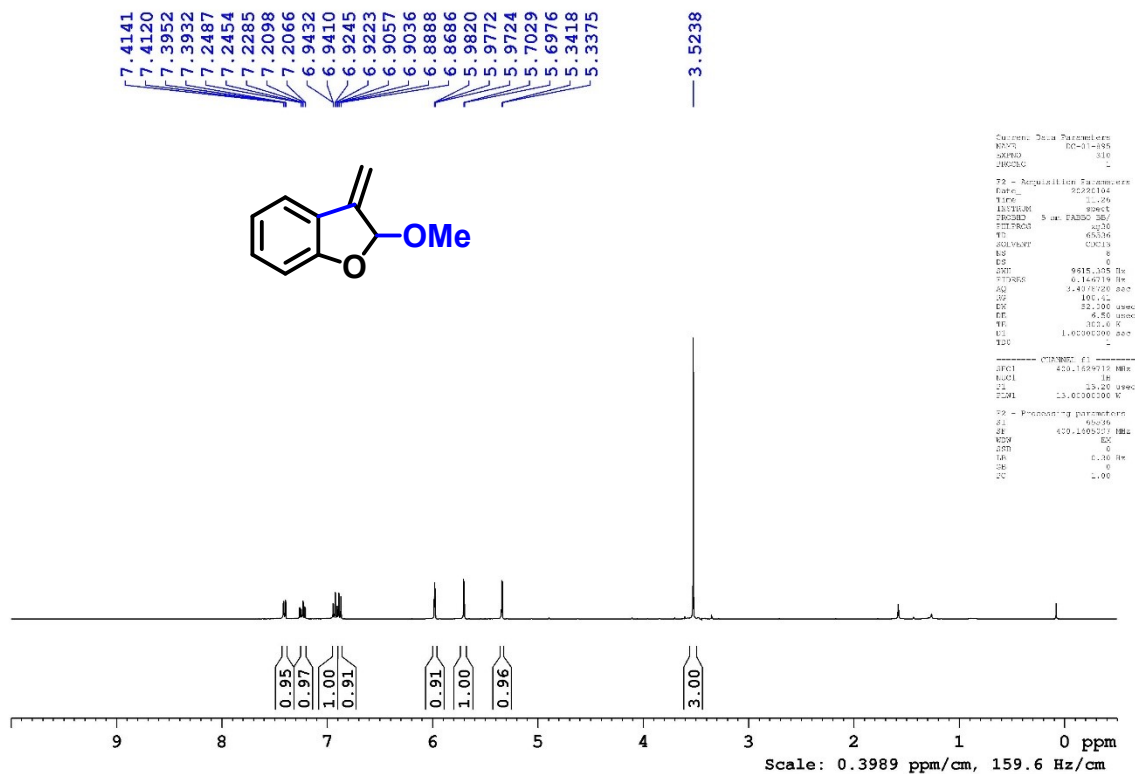

Figure S-100: <sup>1</sup>H NMR (400 MHz, CDCl<sub>3</sub>) spectrum of compound 3w

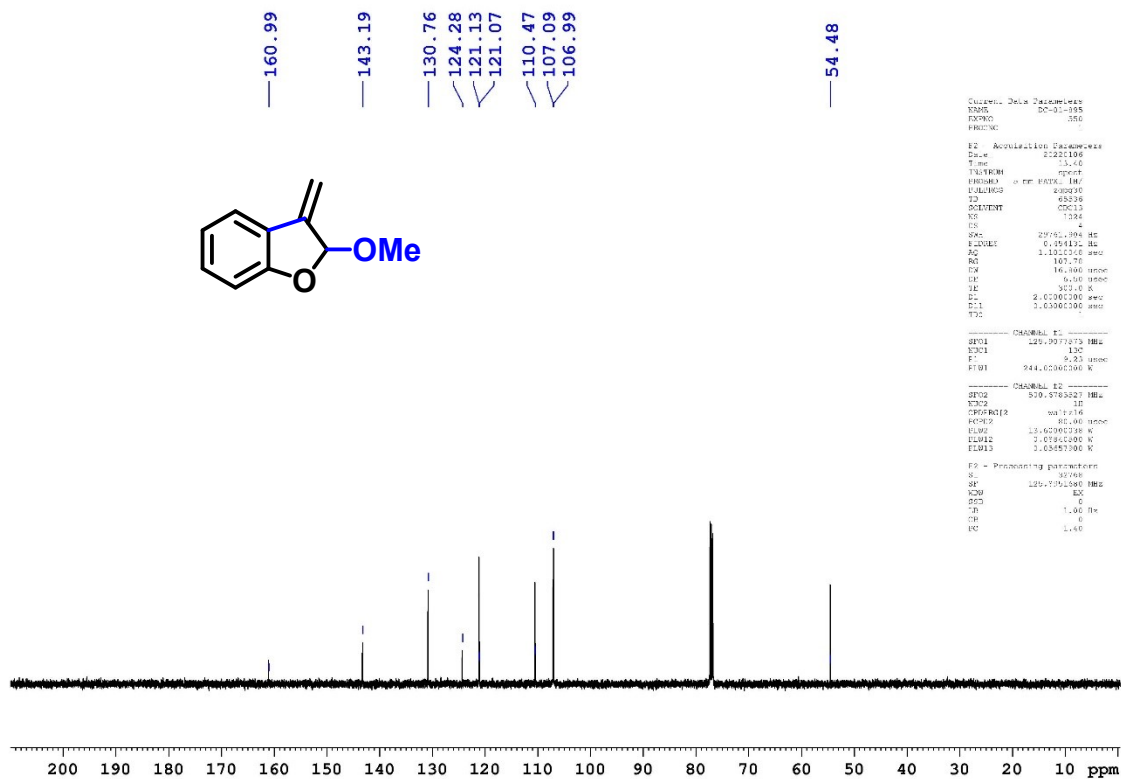

Figure S-101: <sup>13</sup>C NMR (125 MHz, CDCl<sub>3</sub>) spectrum of compound 3w



|               |                |             |             |                 |              |                        |                     |
|---------------|----------------|-------------|-------------|-----------------|--------------|------------------------|---------------------|
| Sample Name   | HRMS22103FEB15 | Position    | Vial 15     | Instrument Name | Instrument 1 | User Name              |                     |
| Inj Vol       | 1              | InjPosition |             | SampleType      | Sample       | IRM Calibration Status | Some Ions Missed    |
| Data Filename | NKM-01-257.d   | ACQ Method  | ISOCRATIC.m | Comment         |              | Acquired Time          | 2/3/2022 2:15:28 PM |

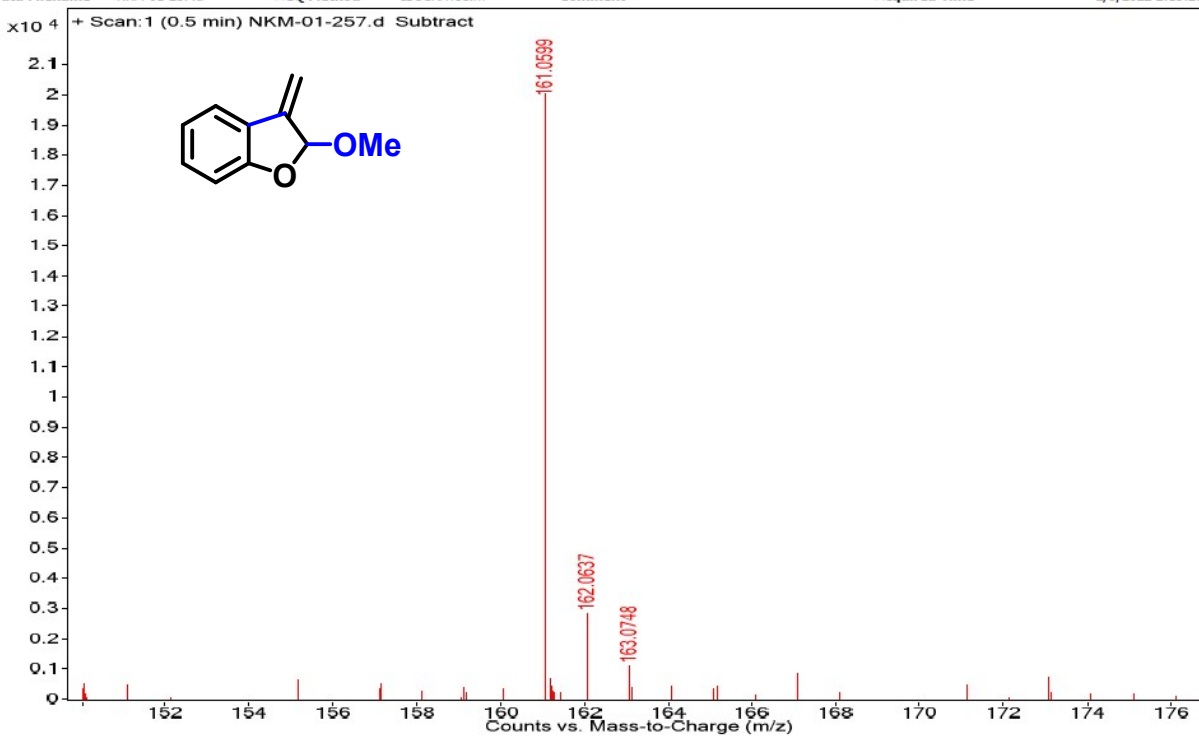

Figure S-102: HRMS spectrum of compound 3w

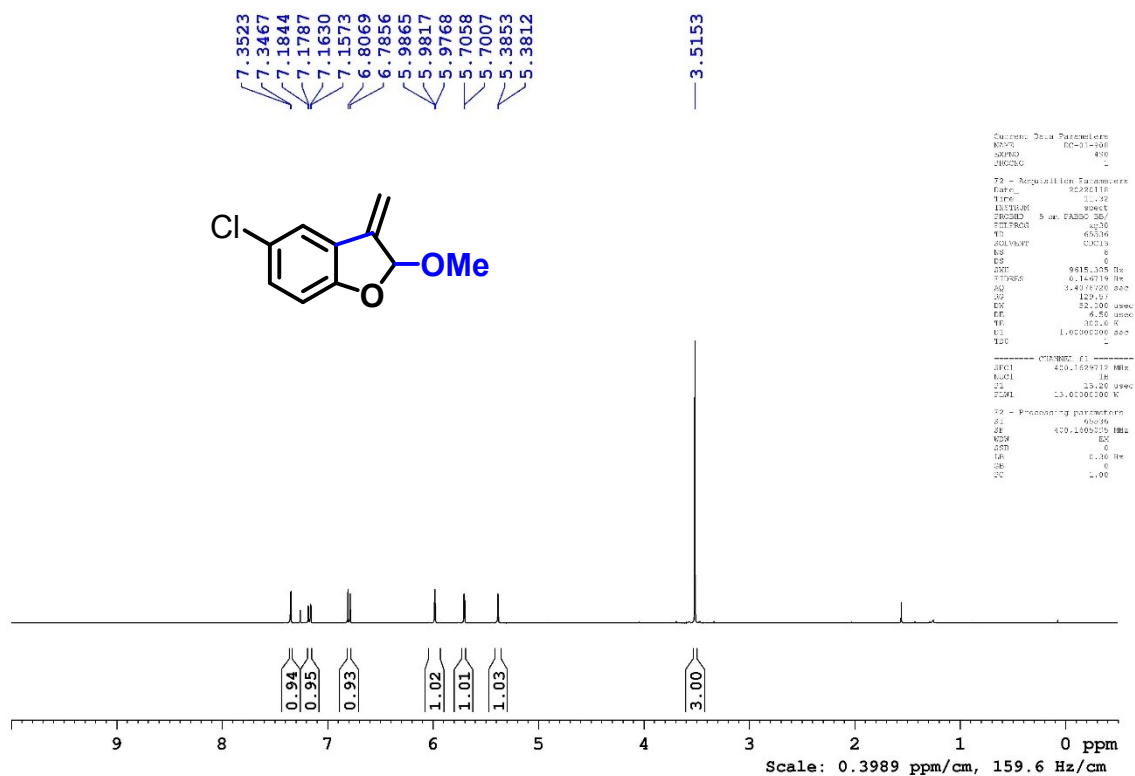

Figure S-103: <sup>1</sup>H NMR (400 MHz, CDCl<sub>3</sub>) spectrum of compound 3x

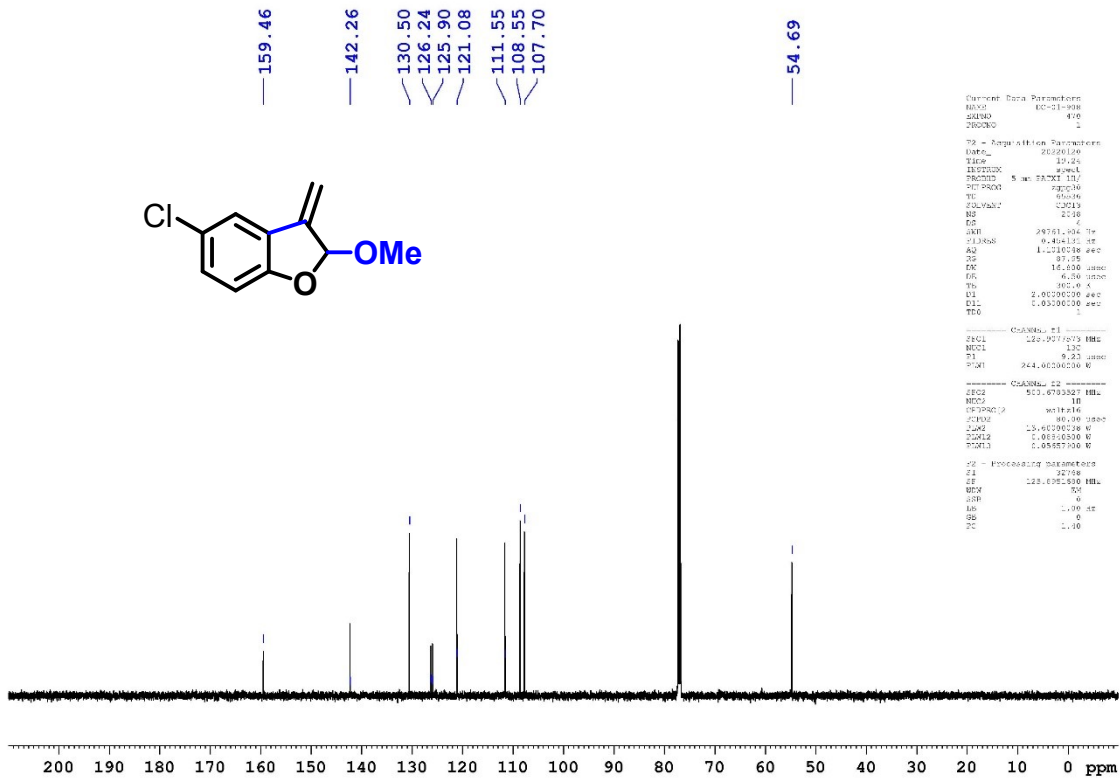

Figure S-104: <sup>13</sup>C NMR (125 MHz, CDCl<sub>3</sub>) spectrum of compound 3x

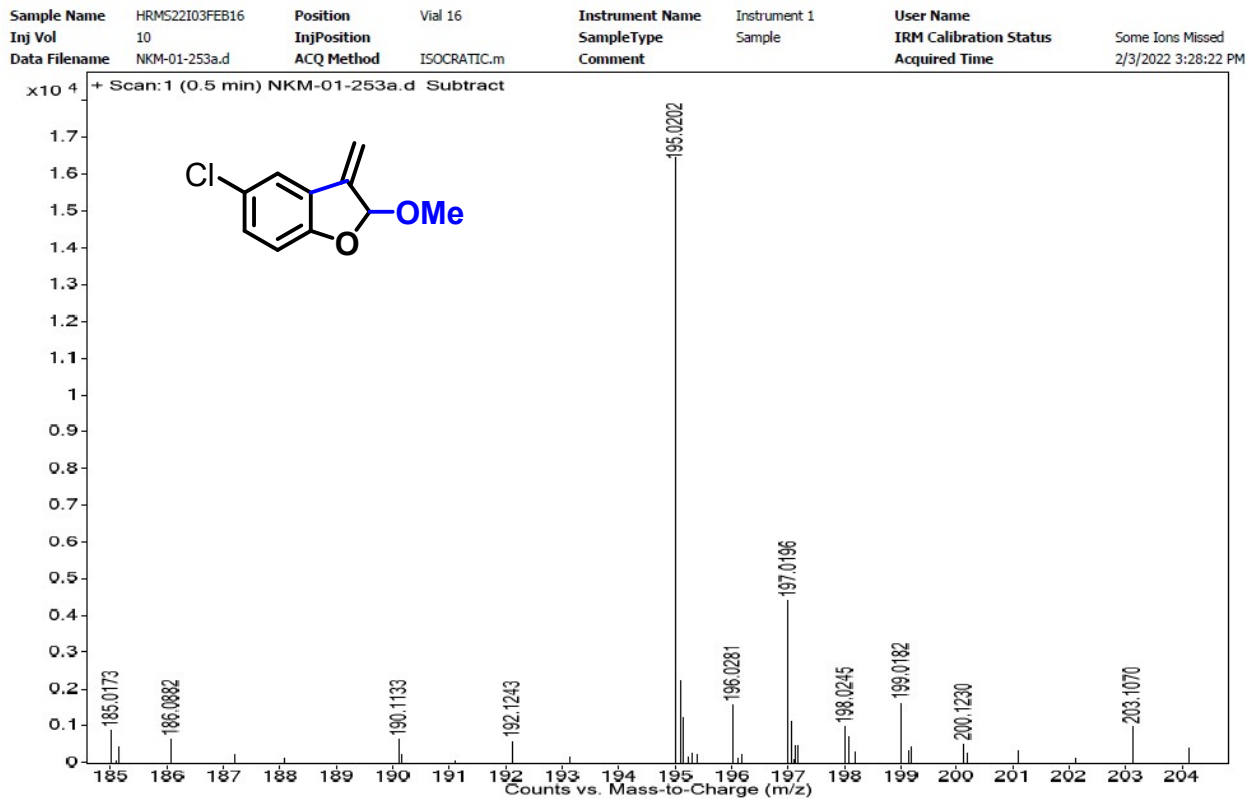

Figure S-105: HRMS spectrum of compound 3x

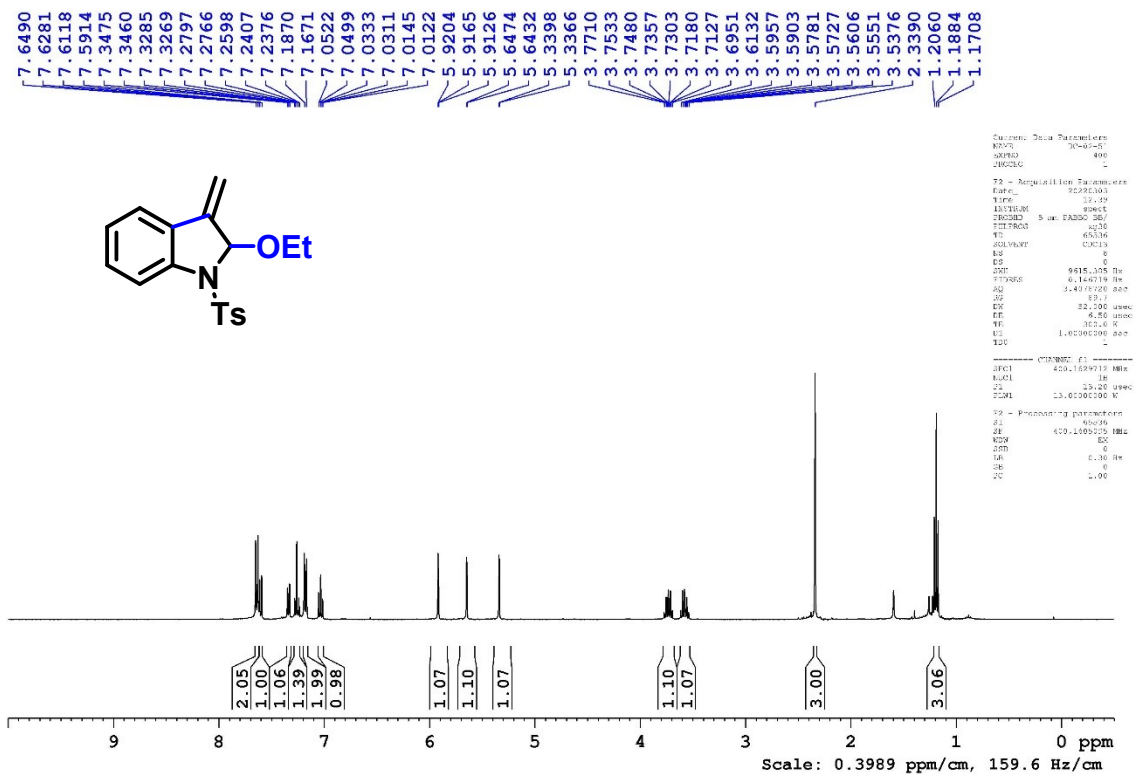

Figure S-106: <sup>1</sup>H NMR (400 MHz, CDCl<sub>3</sub>) spectrum of compound 3aa

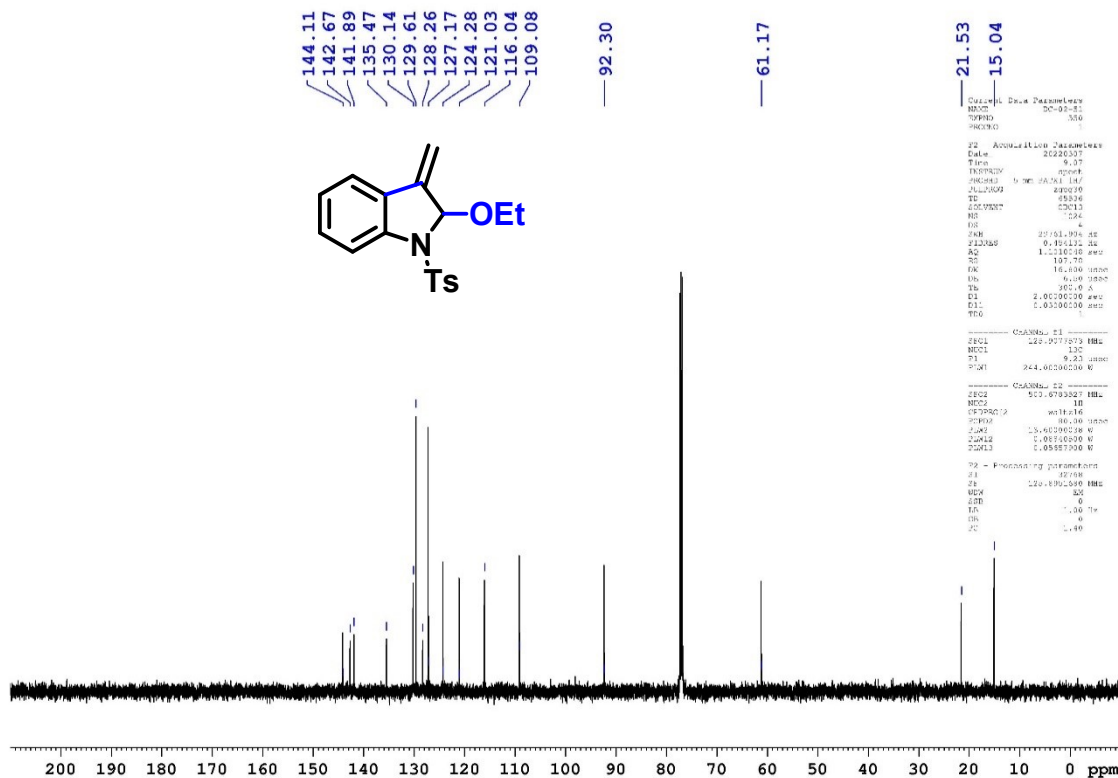

Figure S-107: <sup>13</sup>C NMR (125 MHz, CDCl<sub>3</sub>) spectrum of compound 3aa

| Sample Name   | HRMS22107MAR28 | Position    | Vial 28     | Instrument Name | Instrument 1 | User Name              | IRM Calibration Status | Some Ions Missed    |
|---------------|----------------|-------------|-------------|-----------------|--------------|------------------------|------------------------|---------------------|
| Inj Vol       | 1              | InjPosition |             | SampleType      | Sample       | IRM Calibration Status |                        | 3/7/2022 1:06:35 PM |
| Data Filename | DC-01-415.d    | ACQ Method  | ISOCRATIC.m | Comment         |              | Acquired Time          |                        |                     |

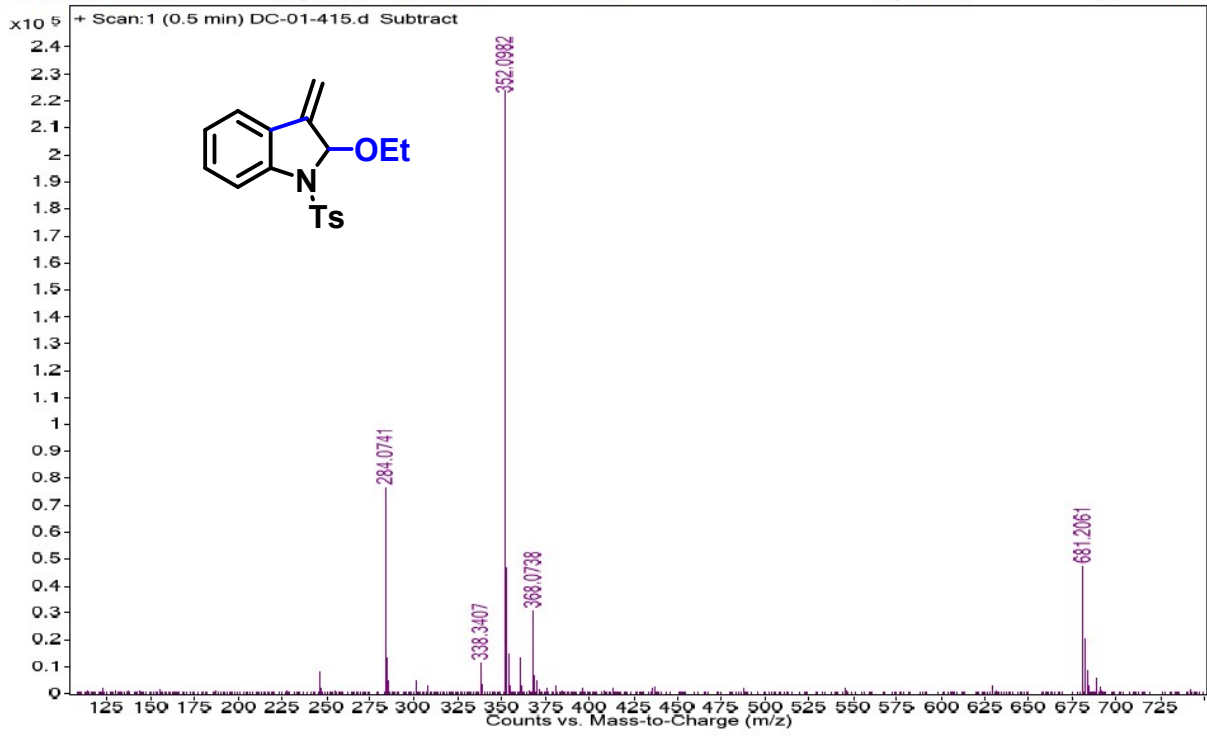

Figure S-108: HRMS spectrum of compound 3aa

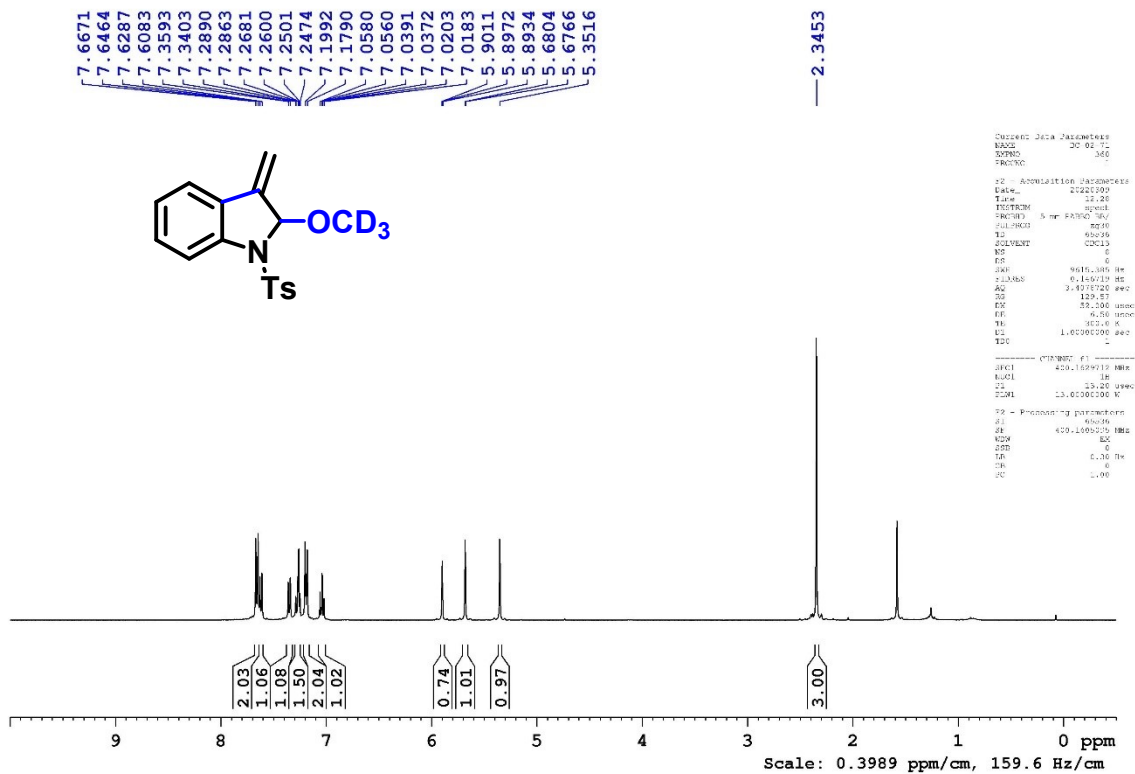

Figure S-109: <sup>1</sup>H NMR (400 MHz, CDCl<sub>3</sub>) spectrum of compound 3a-D

| Sample Name   | HRMS22110MAR25 | Position    | Vial 25     | Instrument Name | Instrument 1 | User Name              |                       |
|---------------|----------------|-------------|-------------|-----------------|--------------|------------------------|-----------------------|
| Inj Vol       | 1              | InjPosition |             | SampleType      | Sample       | IRM Calibration Status | Some Ions Missed      |
| Data Filename | DC-01-286.d    | ACQ Method  | ISOCRATIC.m | Comment         |              | Acquired Time          | 3/10/2022 12:42:40 PM |

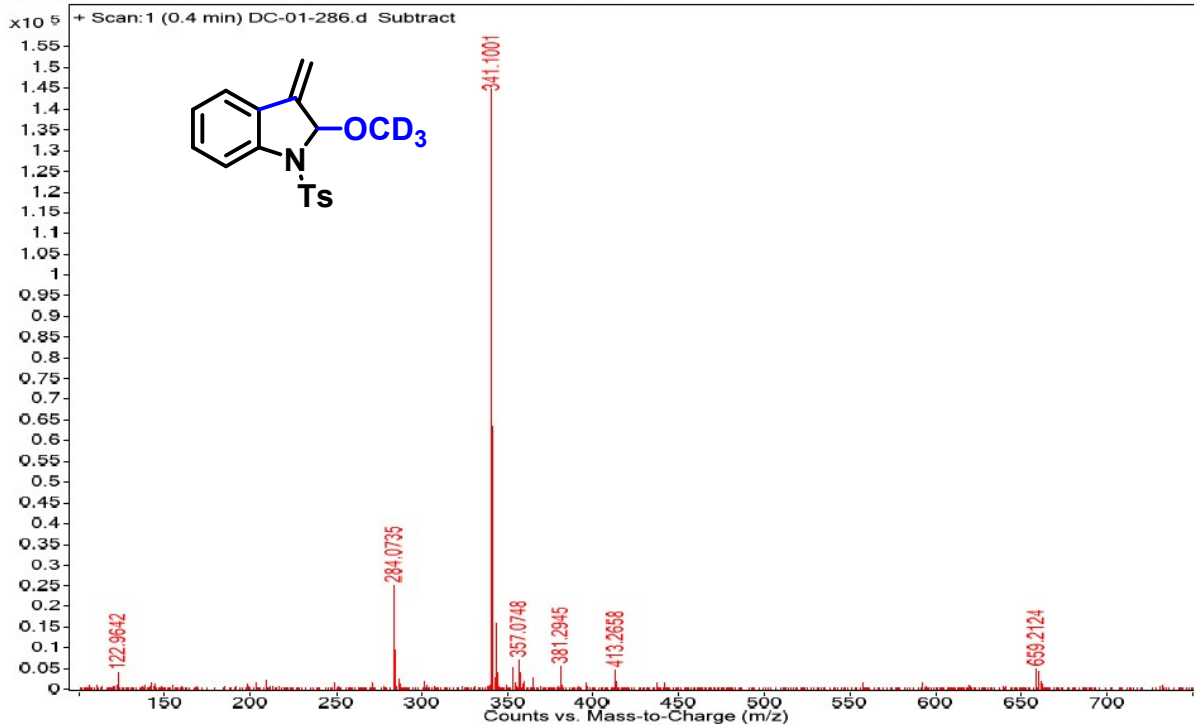

Figure S-110: HRMS spectrum of compound 3a-D

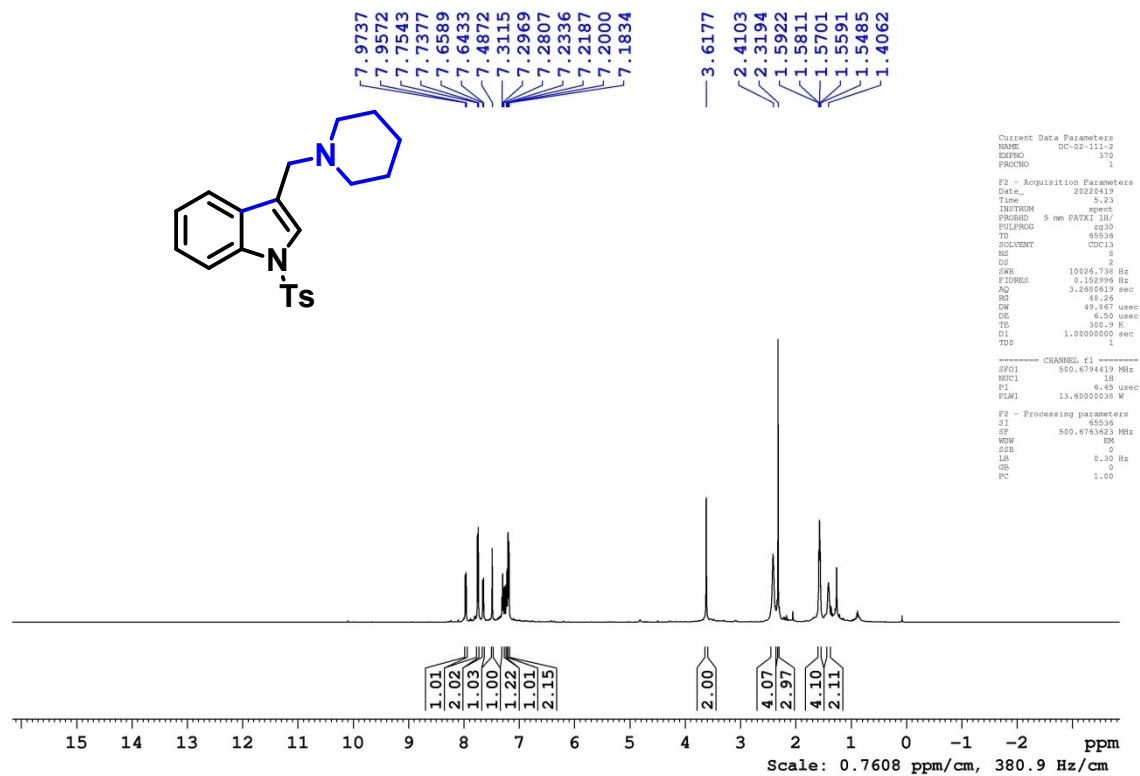

Figure S-111: <sup>1</sup>H NMR (500 MHz, CDCl<sub>3</sub>) spectrum of compound 4ad

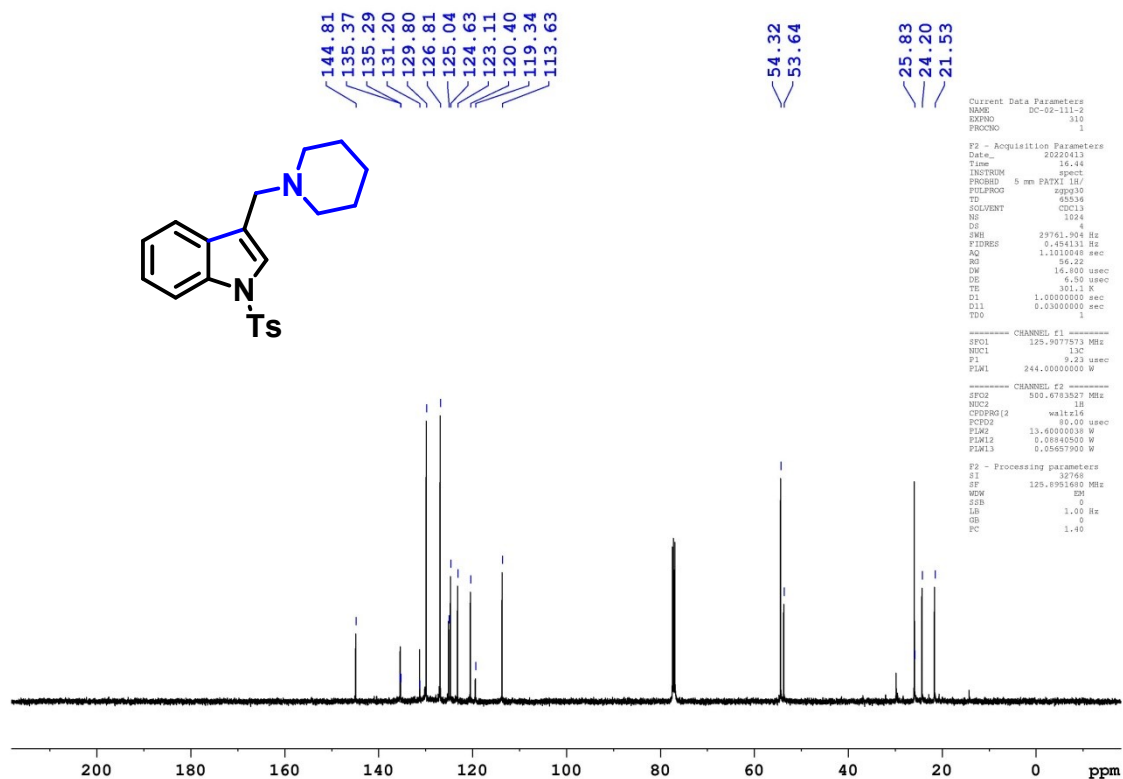

Figure S-112:  $^{13}\text{C}$  NMR (125 MHz,  $\text{CDCl}_3$ ) spectrum of compound 4ad

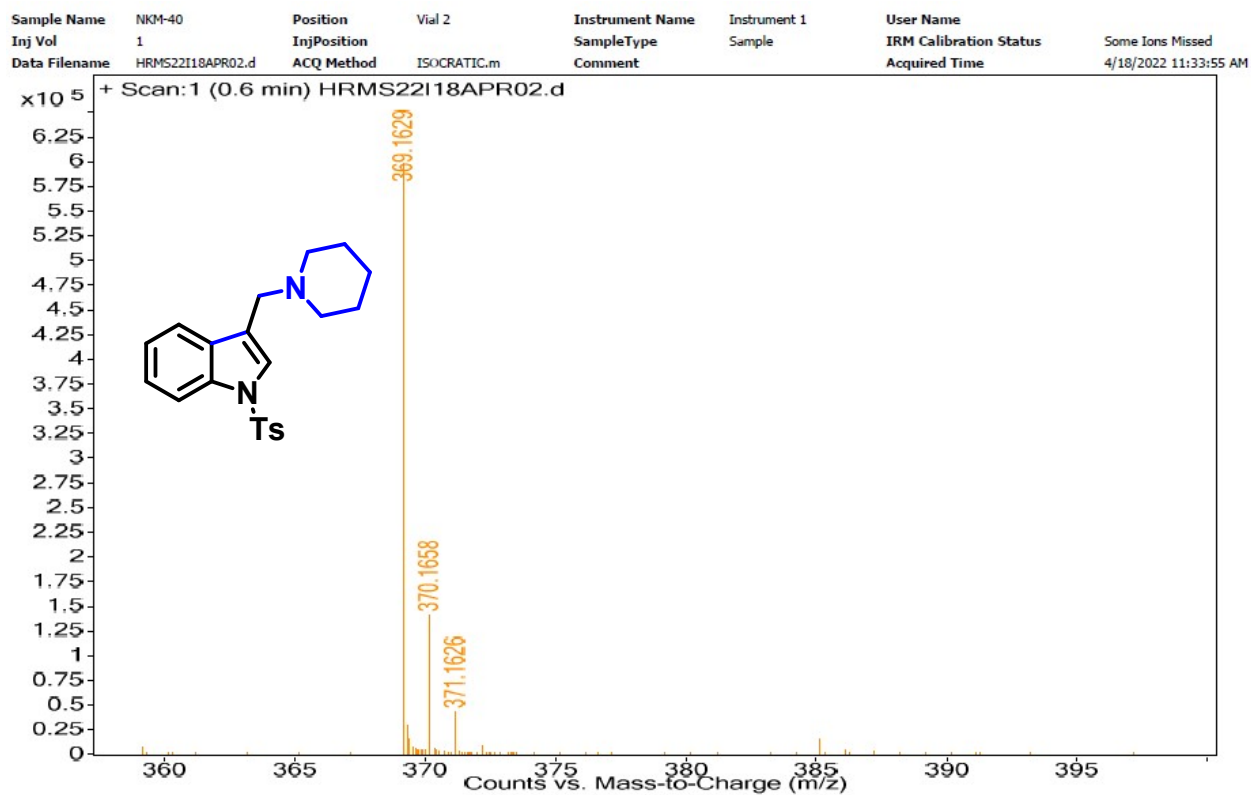

Figure S-113: HRMS spectrum of compound 4ad

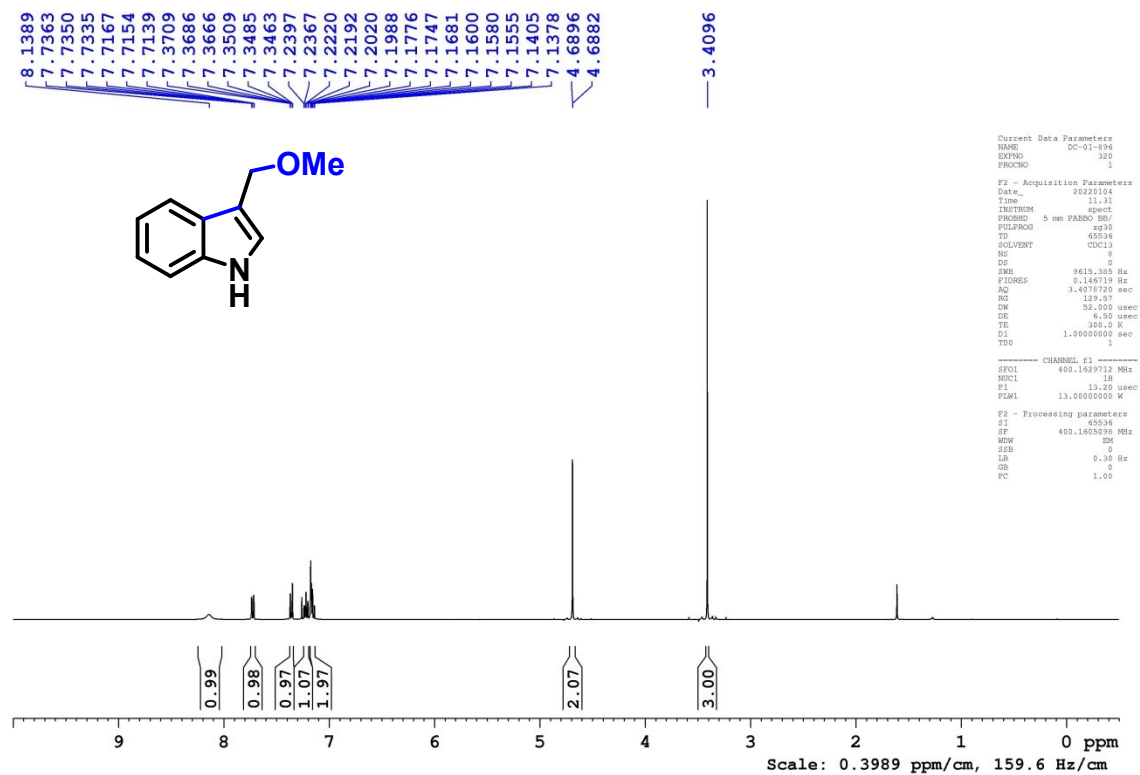

Figure S-114:  $^1\text{H}$  NMR (400 MHz,  $\text{CDCl}_3$ ) spectrum of compound **4a**

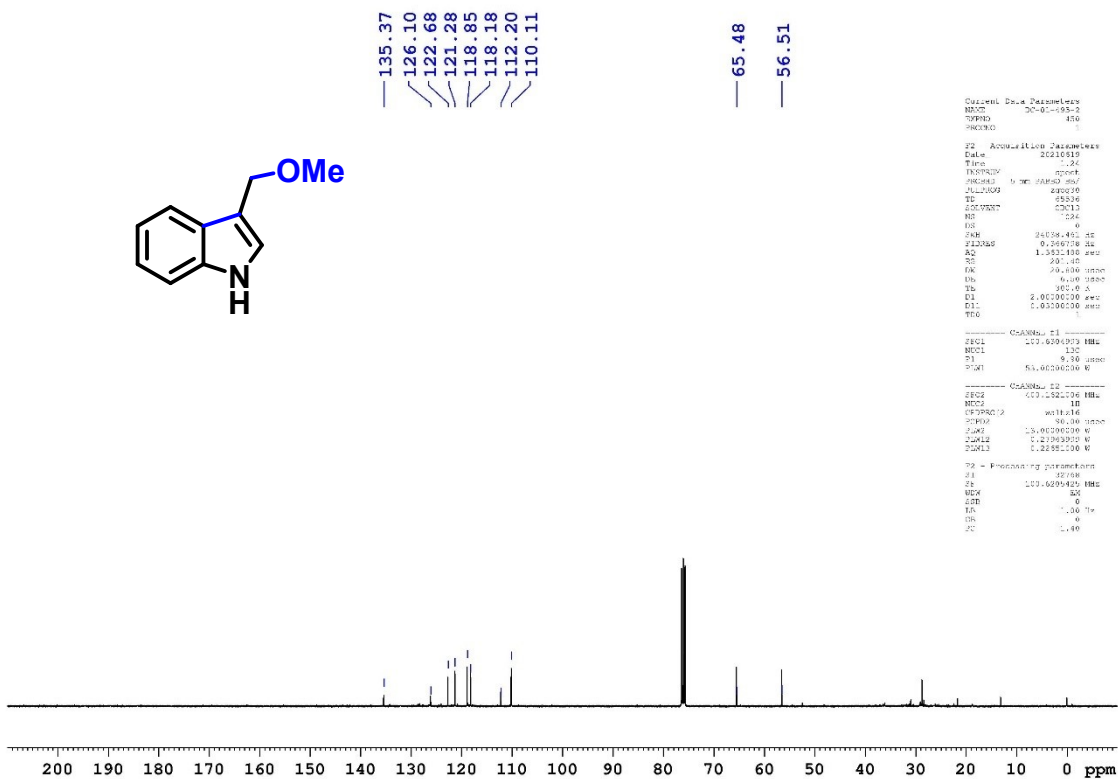

Figure S-115:  $^{13}\text{C}$  NMR (100 MHz,  $\text{CDCl}_3$ ) spectrum of compound **4a**

|               |                |             |             |                 |              |                        |                     |
|---------------|----------------|-------------|-------------|-----------------|--------------|------------------------|---------------------|
| Sample Name   | HRMS22107FEB19 | Position    | Vial 19     | Instrument Name | Instrument 1 | User Name              |                     |
| Inj Vol       | 5              | InjPosition |             | SampleType      | Sample       | IRM Calibration Status | Some Ions Missed    |
| Data Filename | KMR-02-93A6a.d | ACQ Method  | ISOCRATIC.m | Comment         |              | Acquired Time          | 2/7/2022 4:20:43 PM |

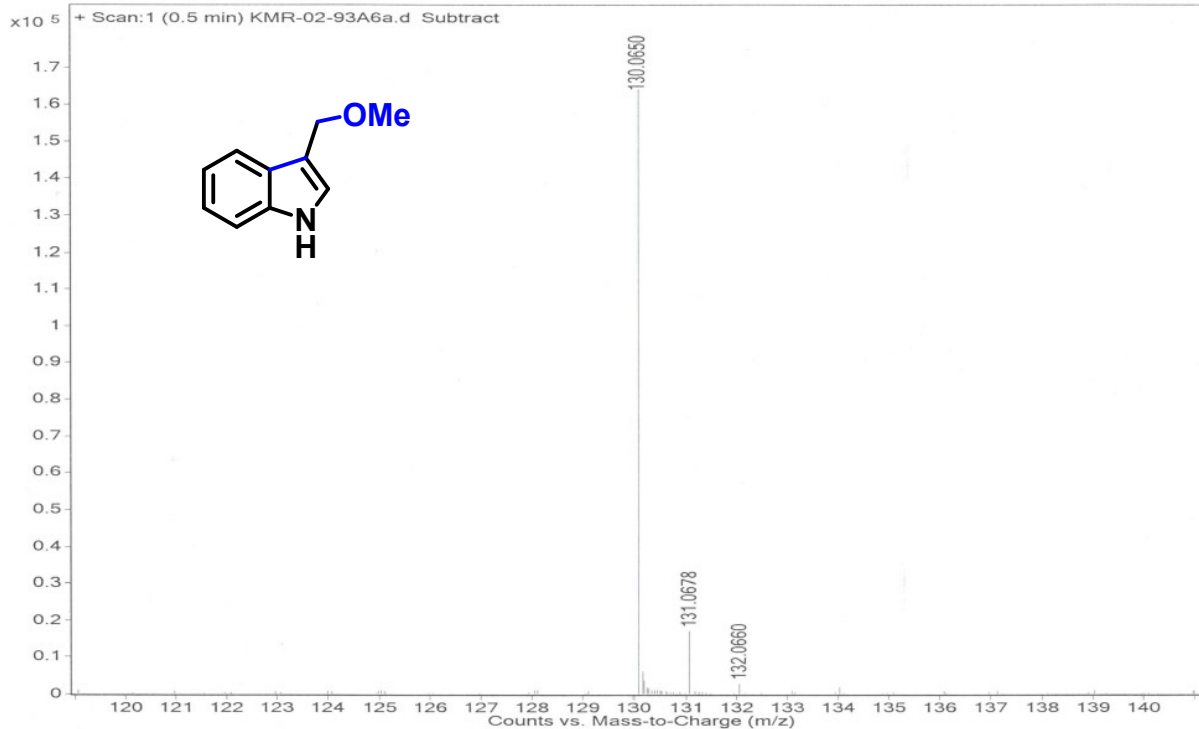

Figure S-116: HRMS spectrum of compound **4a**

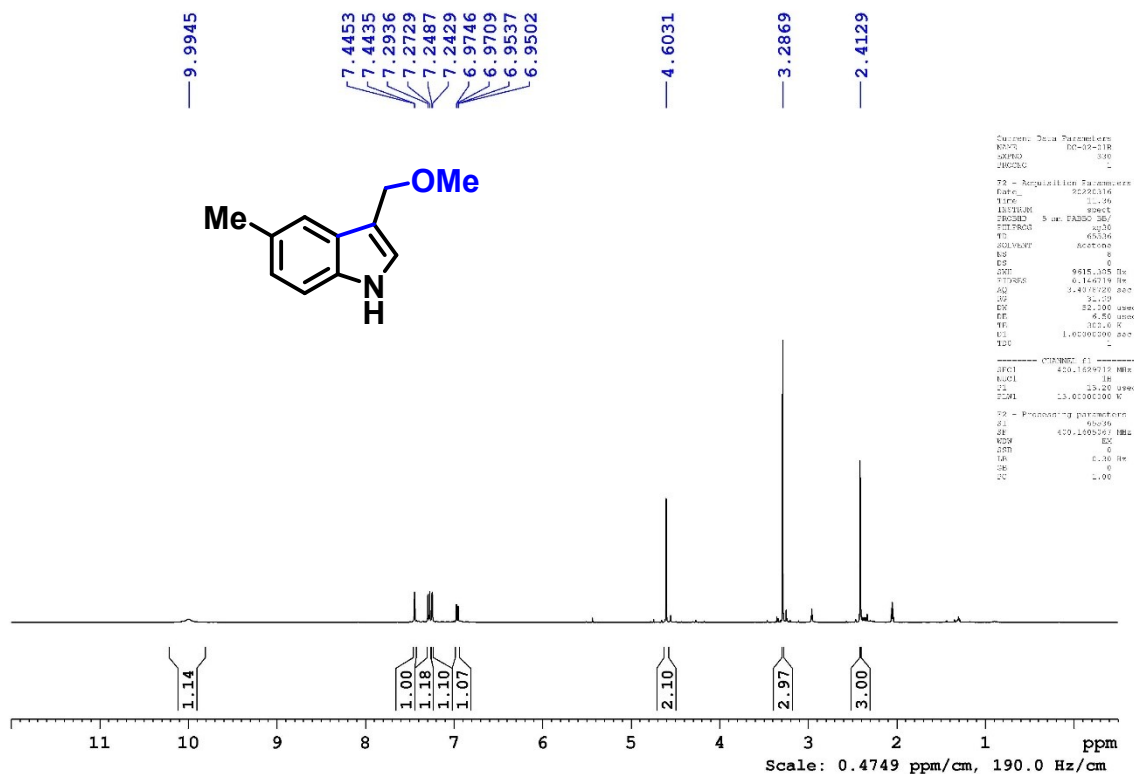

Figure S-117: <sup>1</sup>H NMR (400 MHz, D<sub>6</sub>-acetone) spectrum of compound **4b**



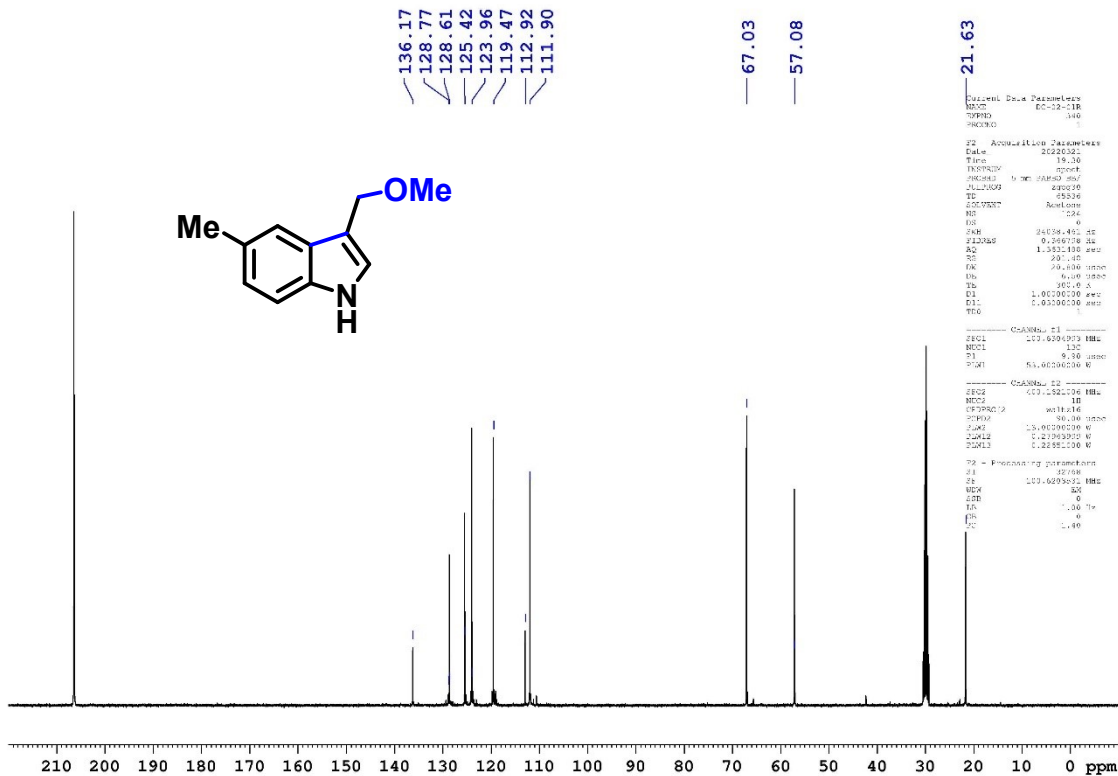

Figure S-118: <sup>13</sup>C NMR (100 MHz, D<sub>6</sub>-acetone) spectrum of compound 4b

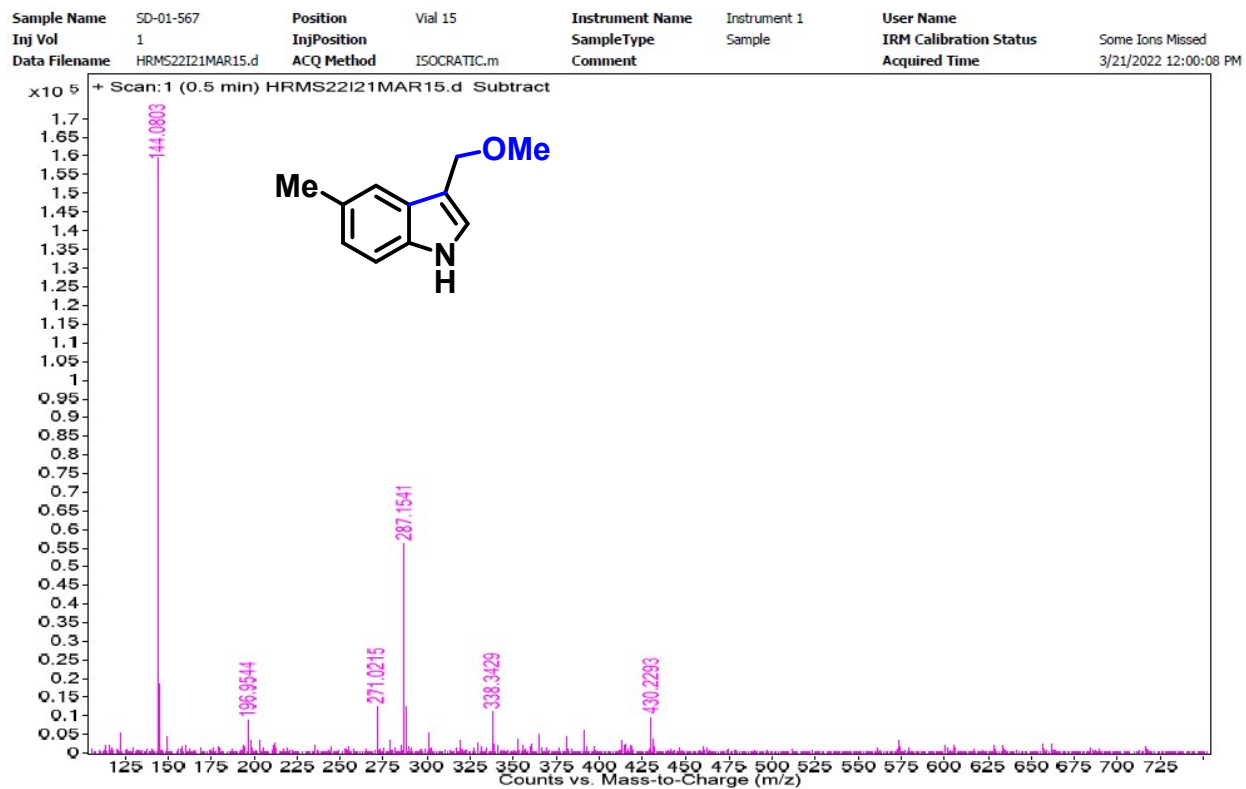

Figure S-119: HRMS spectrum of compound 4b

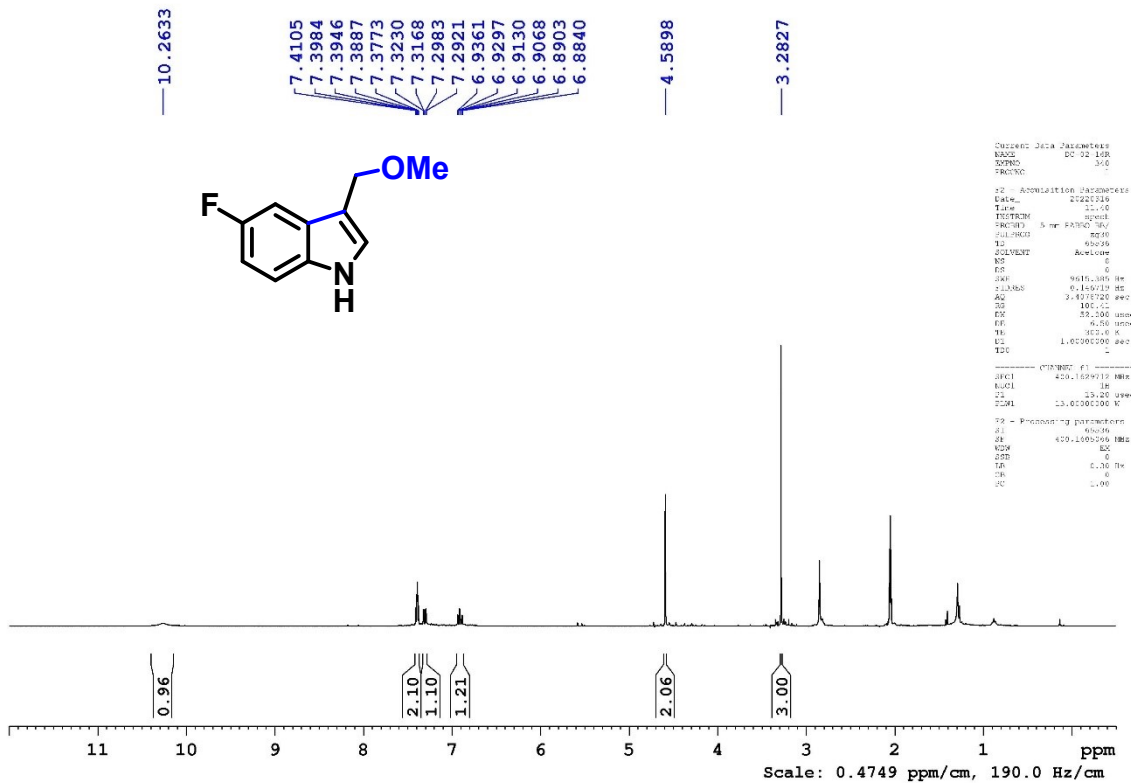

Figure S-120: <sup>1</sup>H NMR (400 MHz, D<sub>6</sub>-acetone) spectrum of compound 4c

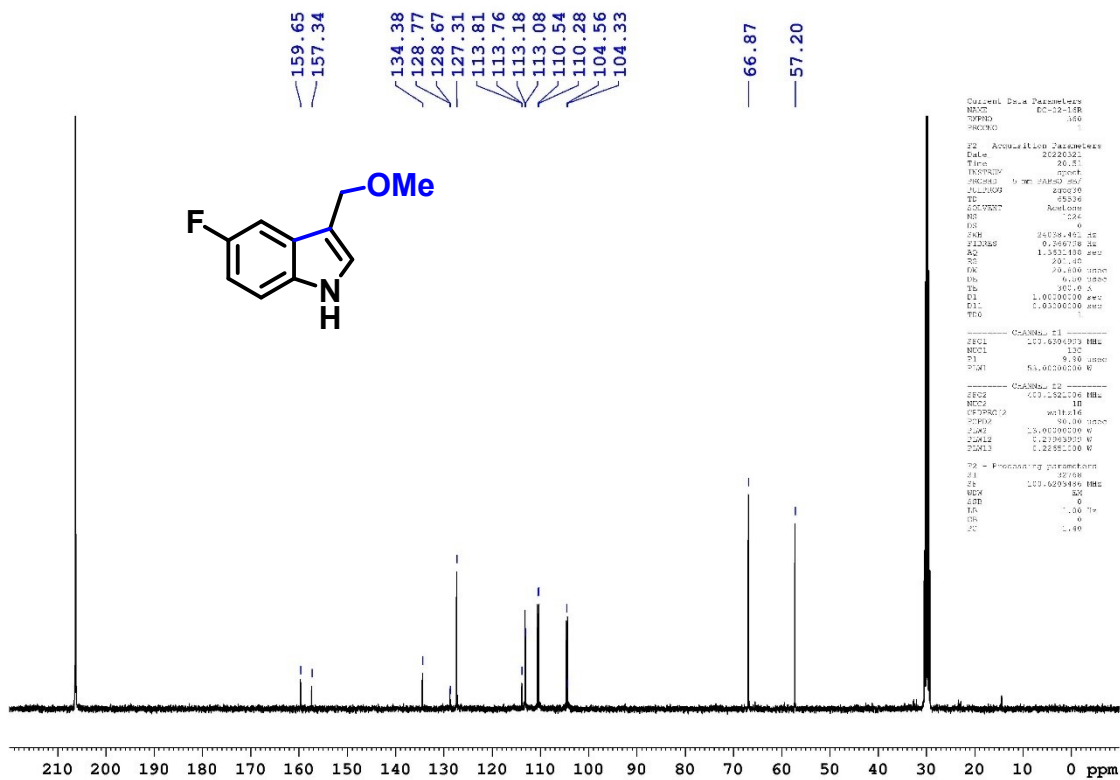

Figure S-121: <sup>13</sup>C NMR (100 MHz, D<sub>6</sub>-acetone) spectrum of compound 4c

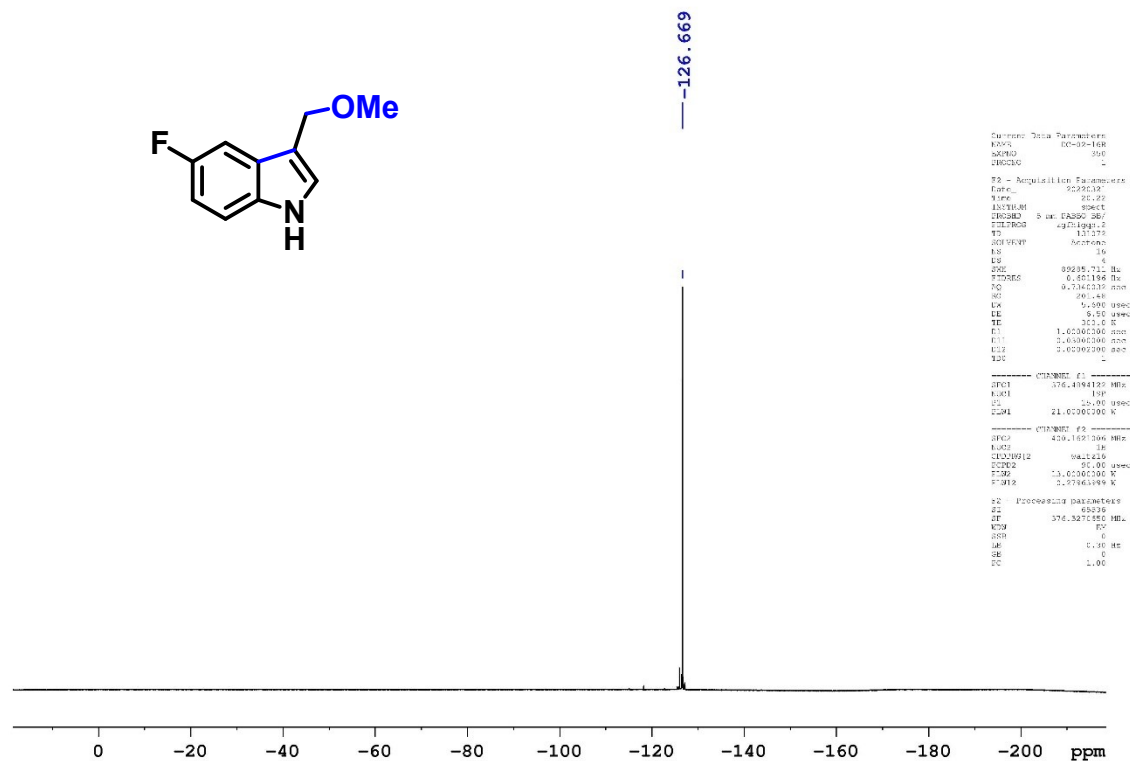

Figure S-122: <sup>19</sup>F NMR (376 MHz, D<sub>6</sub>-acetone) spectrum of compound 4c

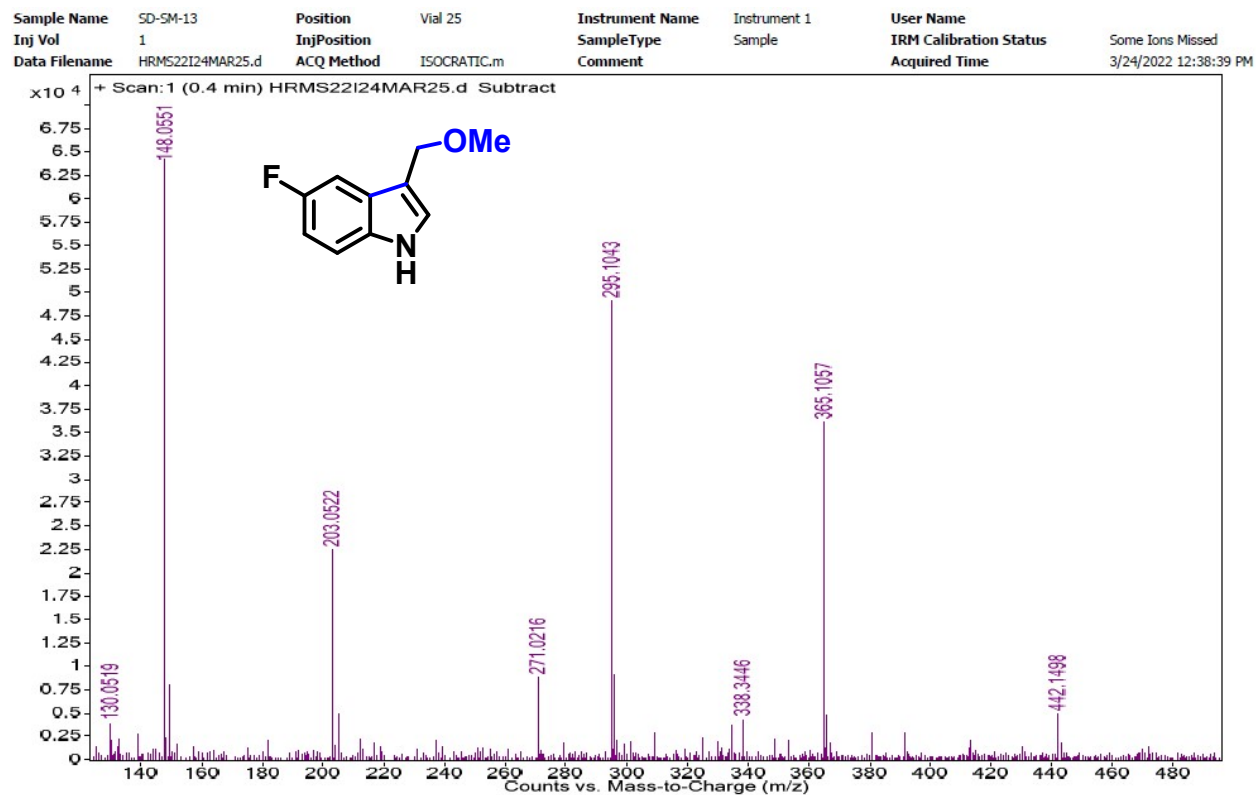

Figure S-123: HRMS spectrum of compound 4c

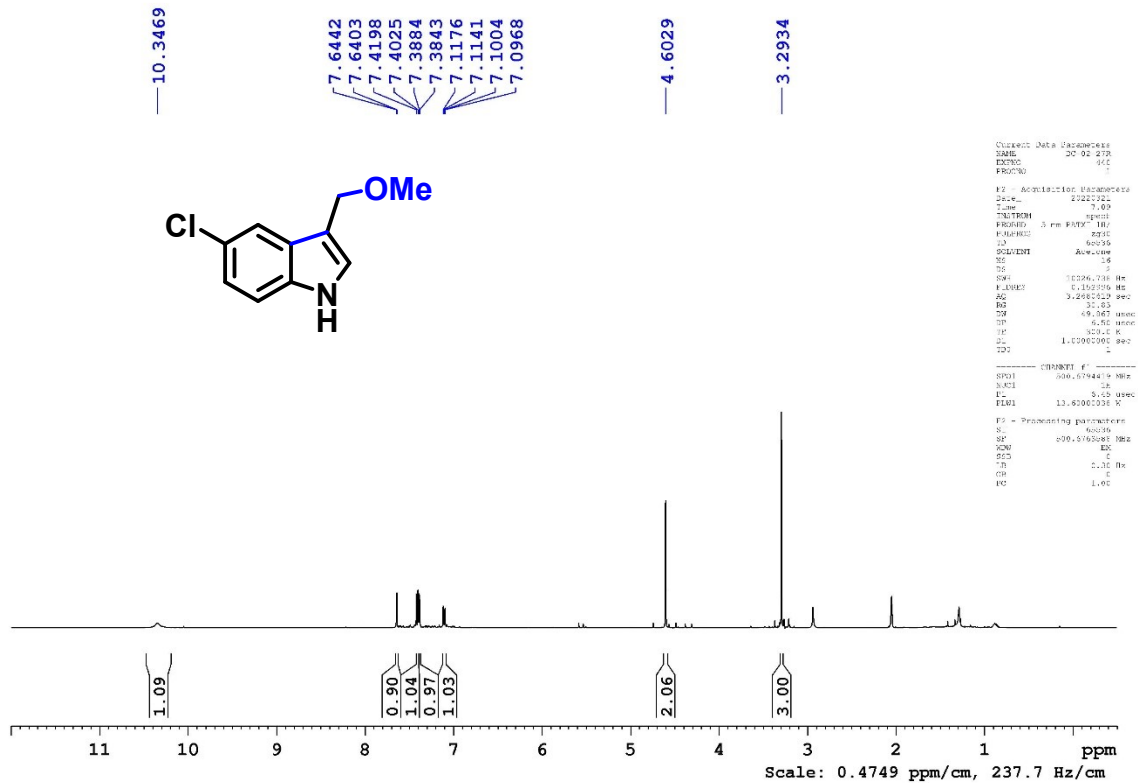

Figure S-124: <sup>1</sup>H NMR (500 MHz, D<sub>6</sub>-acetone) spectrum of compound 4d

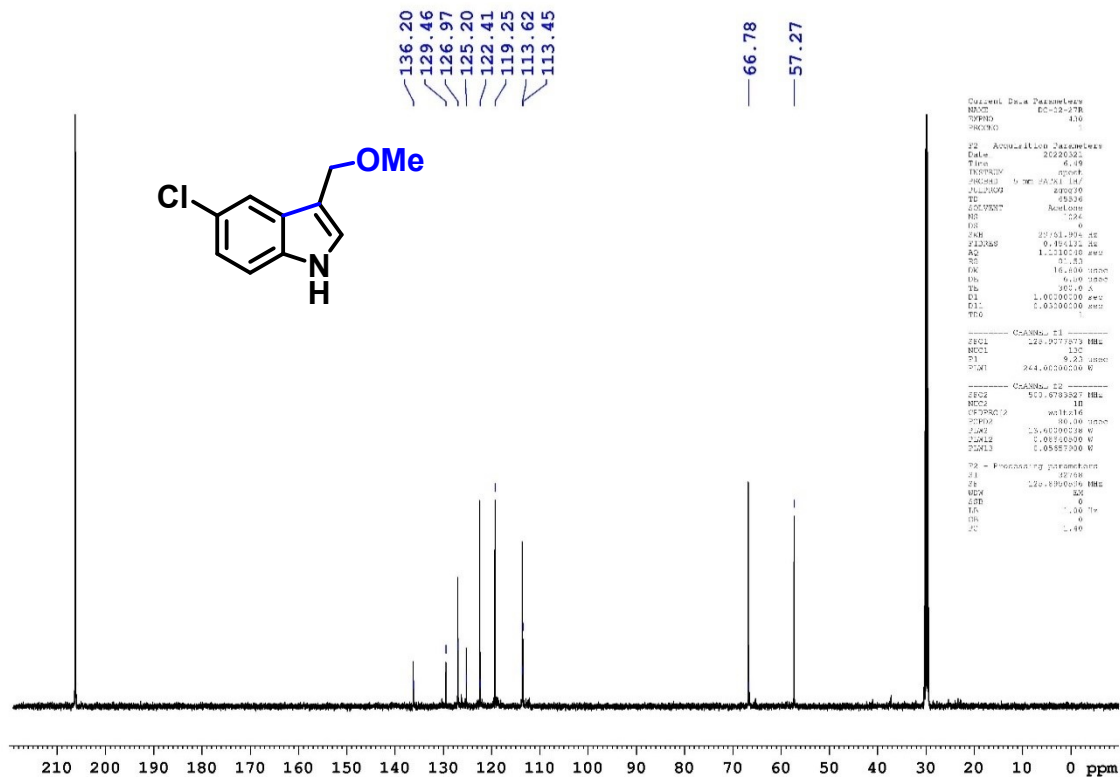

Figure S-125: <sup>13</sup>C NMR (125 MHz, D<sub>6</sub>-acetone) spectrum of compound 4d

| Sample Name   | DC-01-913        | Position    | Vial 18     | Instrument Name | Instrument 1 | User Name              |                       |
|---------------|------------------|-------------|-------------|-----------------|--------------|------------------------|-----------------------|
| Inj Vol       | 1                | InjPosition |             | SampleType      | Sample       | IRM Calibration Status | Some Ions Missed      |
| Data Filename | HRMS22122MAR18.d | ACQ Method  | ISOCRATIC.m | Comment         |              | Acquired Time          | 3/22/2022 12:15:59 PM |

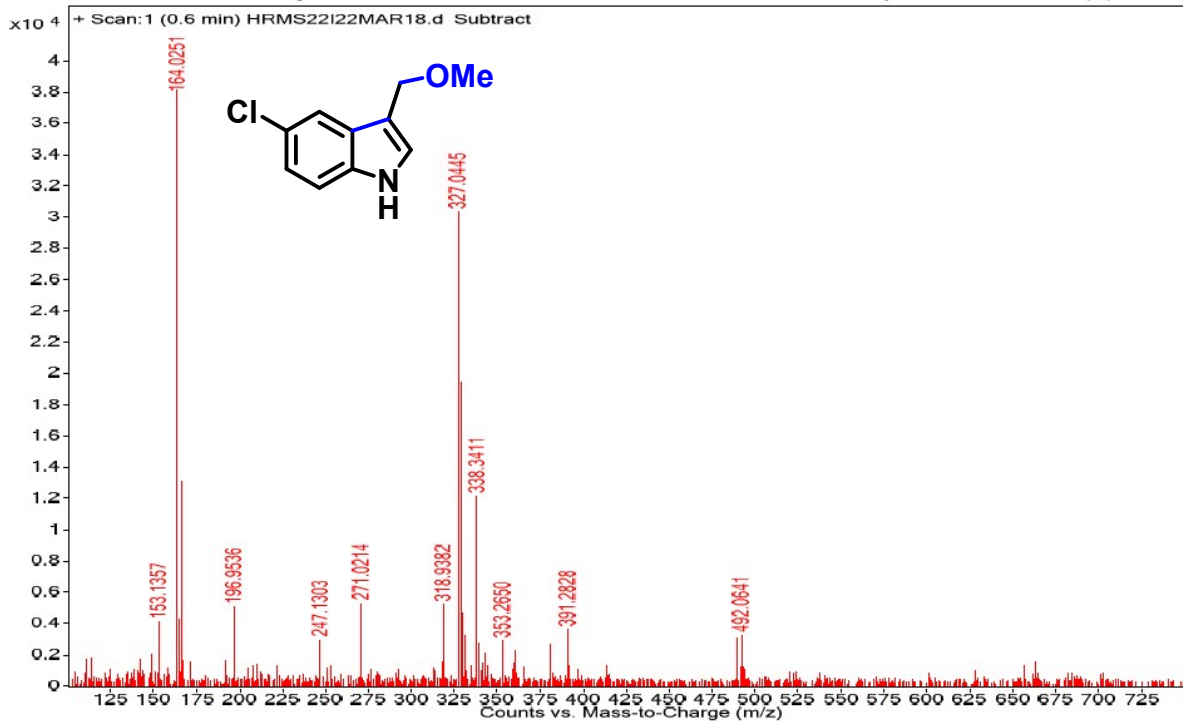

Figure S-126: HRMS spectrum of compound 4d

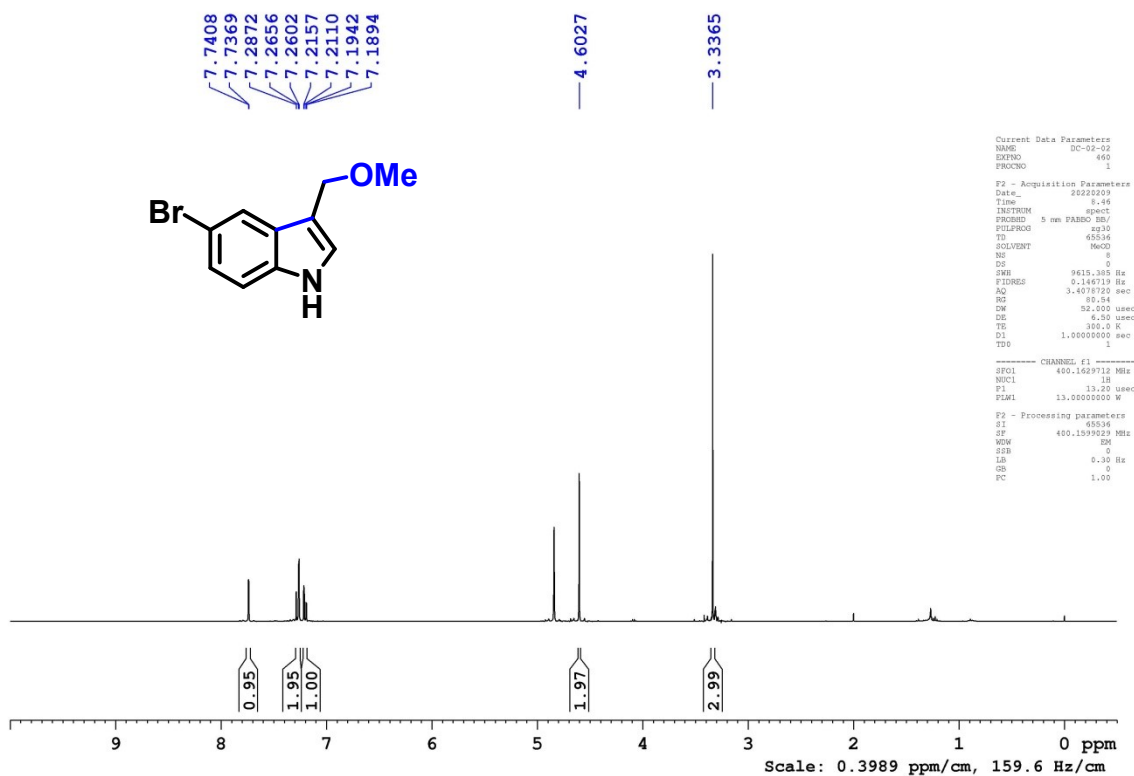

Figure S-127: <sup>1</sup>H NMR (400 MHz, D<sub>4</sub>-methanol) spectrum of compound 4e

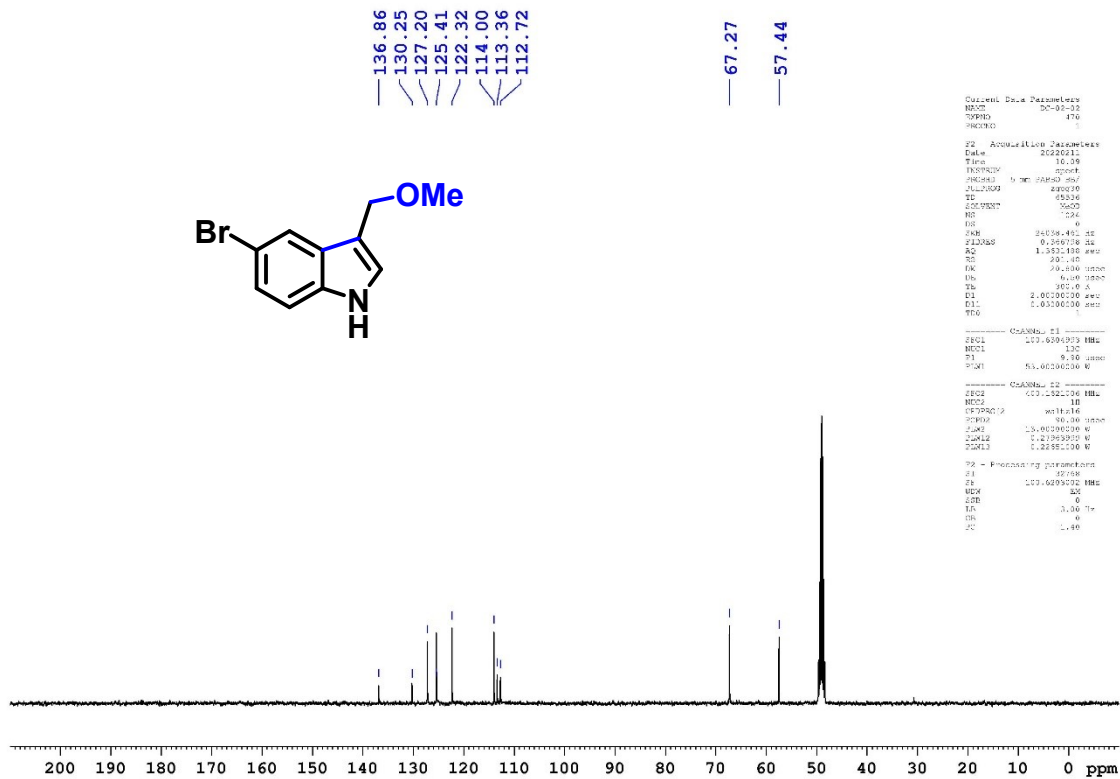

Figure S-128: <sup>13</sup>C NMR (100 MHz, D<sub>4</sub>-methanol) spectrum of compound 4e

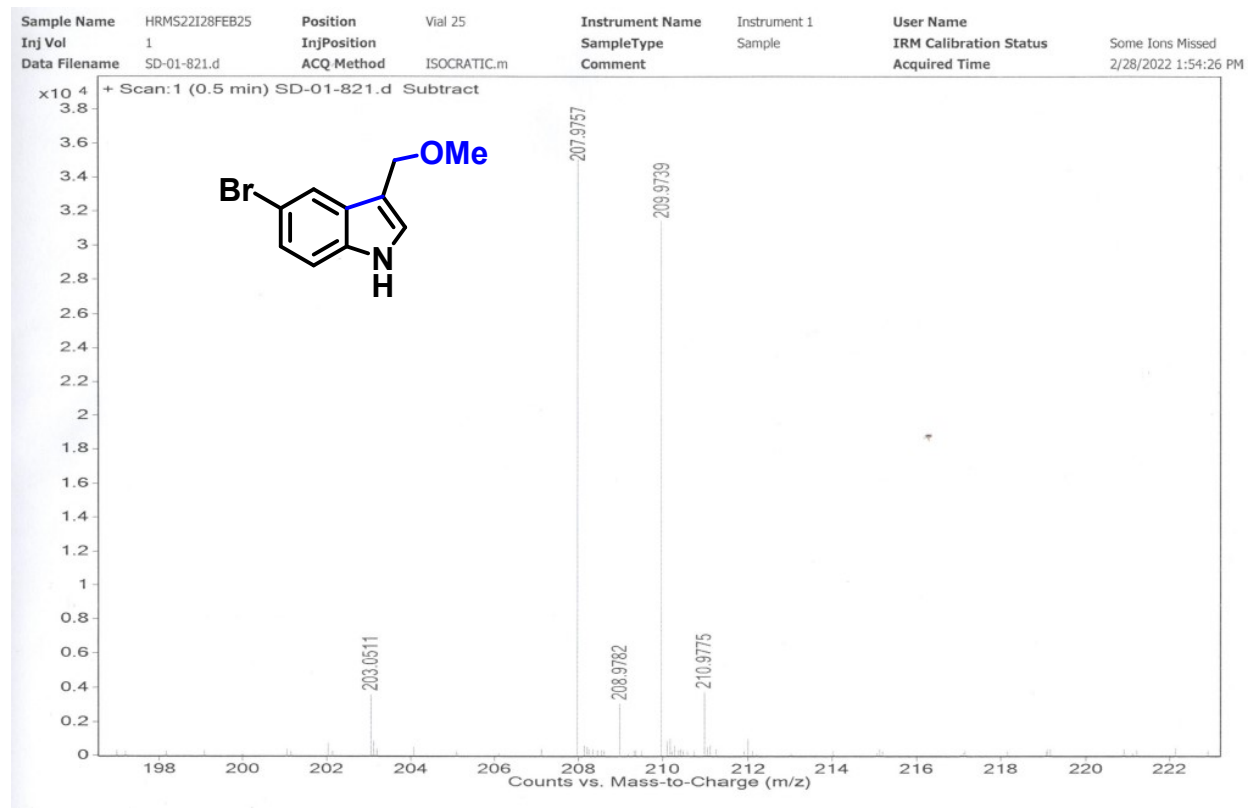

Figure S-129: HRMS spectrum of compound 4e

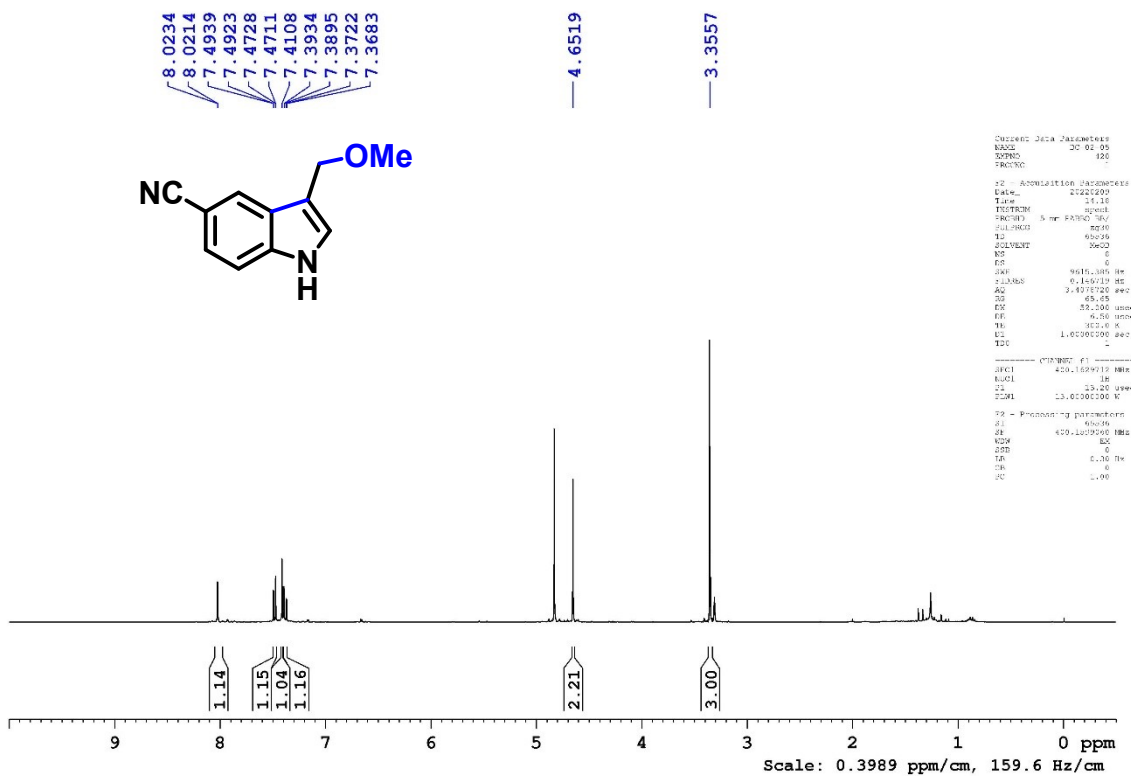

Figure S-130: <sup>1</sup>H NMR (400 MHz, D<sub>4</sub>-methanol) spectrum of compound 4f

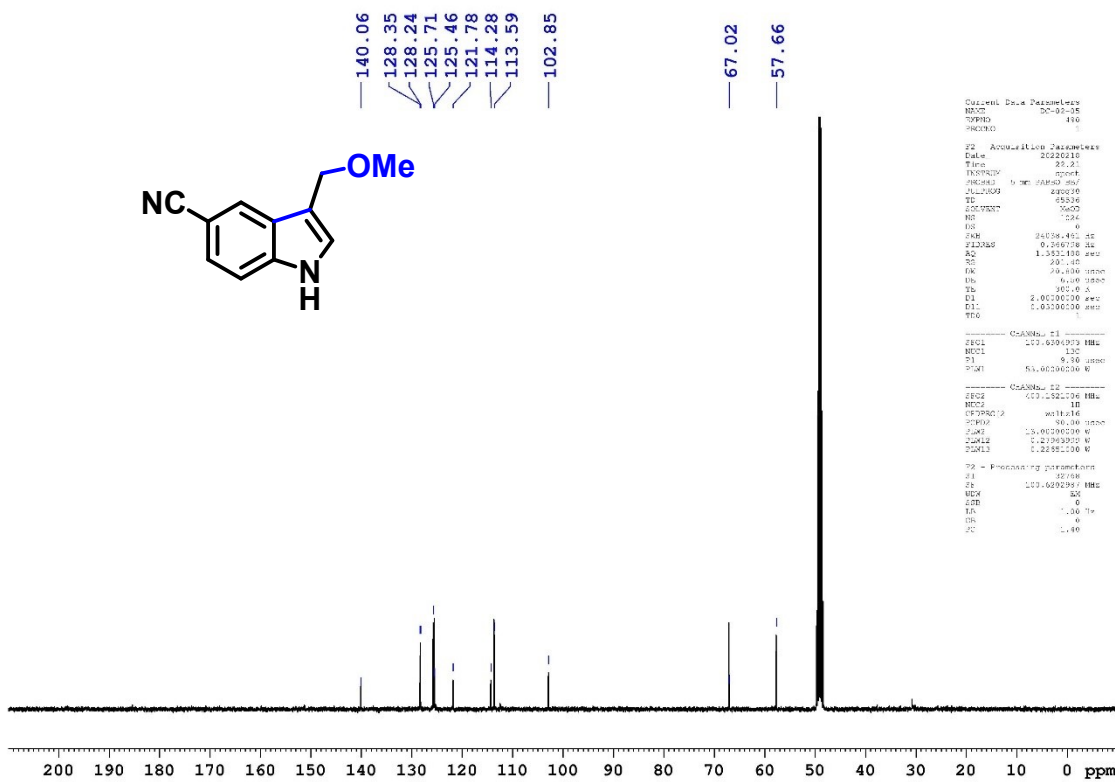

Figure S-131: <sup>13</sup>C NMR (100 MHz, D<sub>4</sub>-methanol) spectrum of compound 4f

|               |                |             |             |                 |              |                        |                       |
|---------------|----------------|-------------|-------------|-----------------|--------------|------------------------|-----------------------|
| Sample Name   | HRMS22I18FEB10 | Position    | Vial 10     | Instrument Name | Instrument 1 | User Name              |                       |
| Inj Vol       | 5              | InjPosition |             | SampleType      | Sample       | IRM Calibration Status | Some Ions Missed      |
| Data Filename | DC-01-314_1.d  | ACQ Method  | ISOCRATIC.m | Comment         |              | Acquired Time          | 2/18/2022 12:50:23 PM |

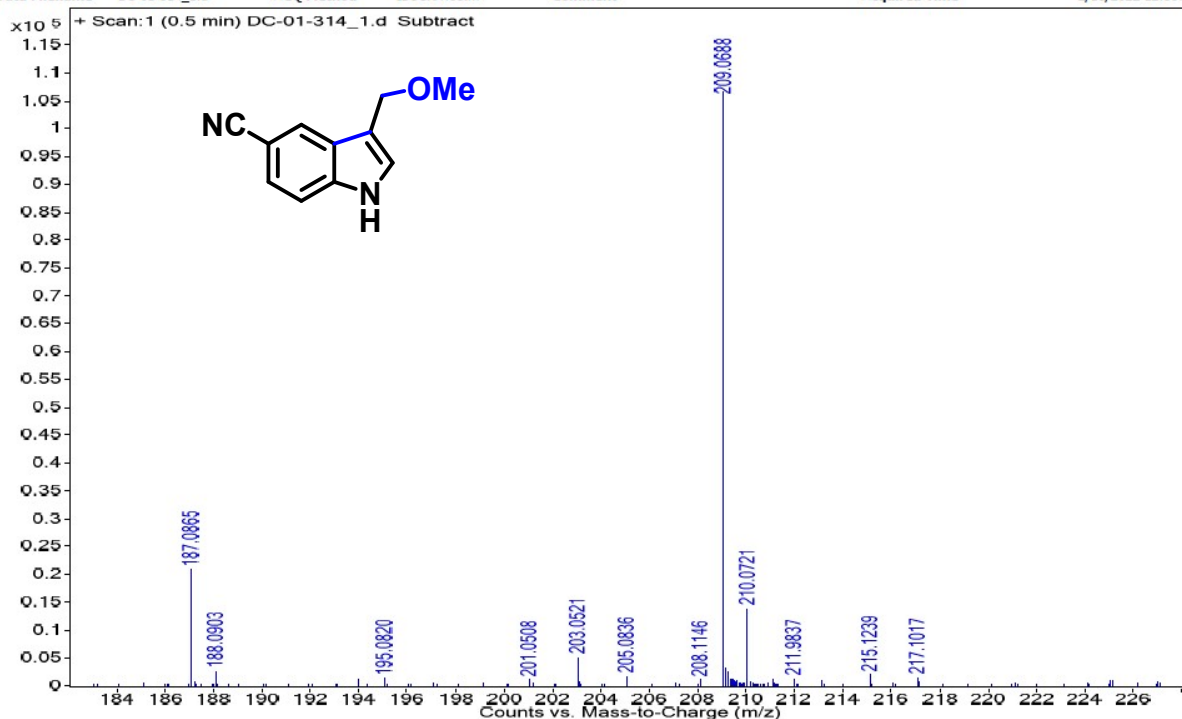

Figure S-132: HRMS spectrum of compound 4f

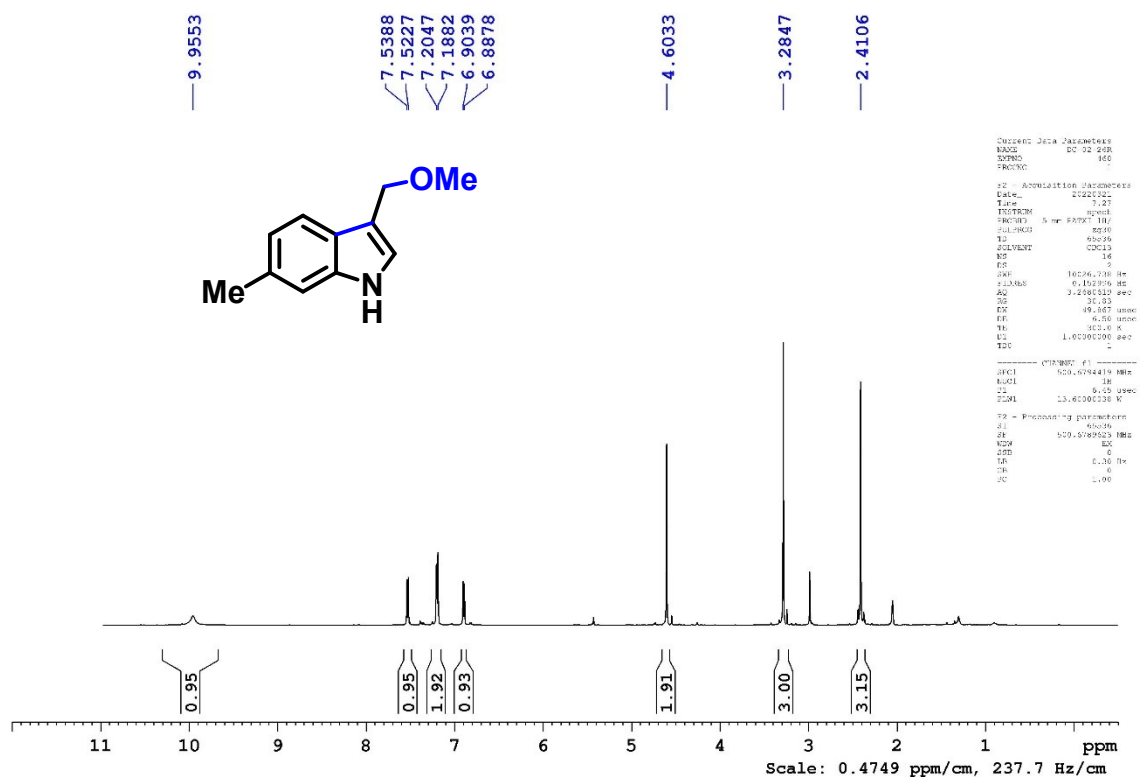

Figure S-133: <sup>1</sup>H NMR (500 MHz, CDCl<sub>3</sub>) spectrum of compound 4g



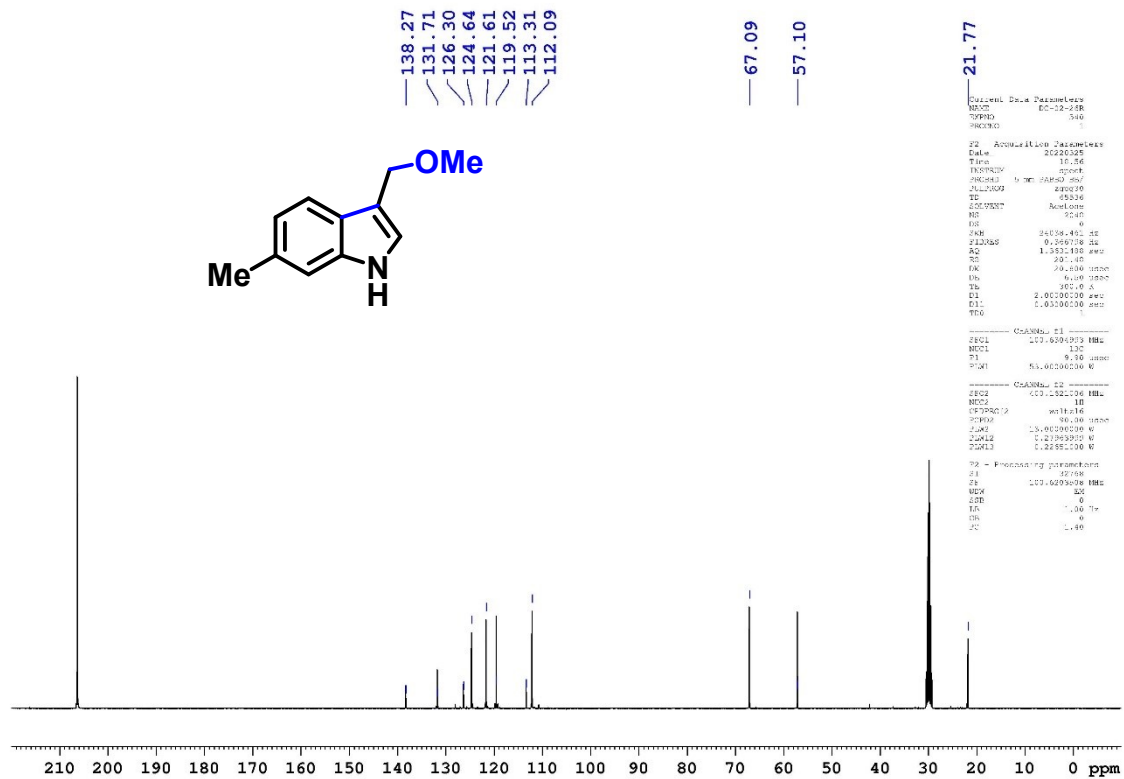

Figure S-134: <sup>13</sup>C NMR (100 MHz, D<sub>6</sub>-acetone) spectrum of compound 4g

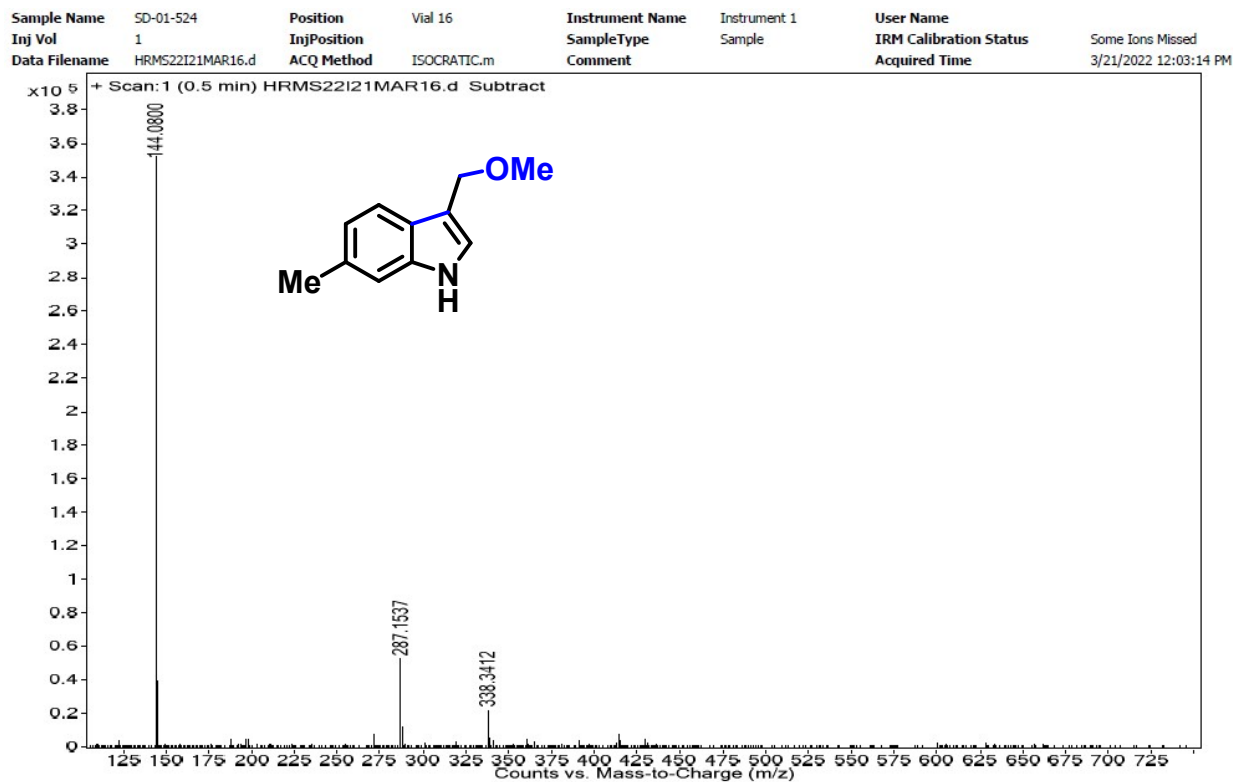

Figure S-135: HRMS spectrum of compound 4g

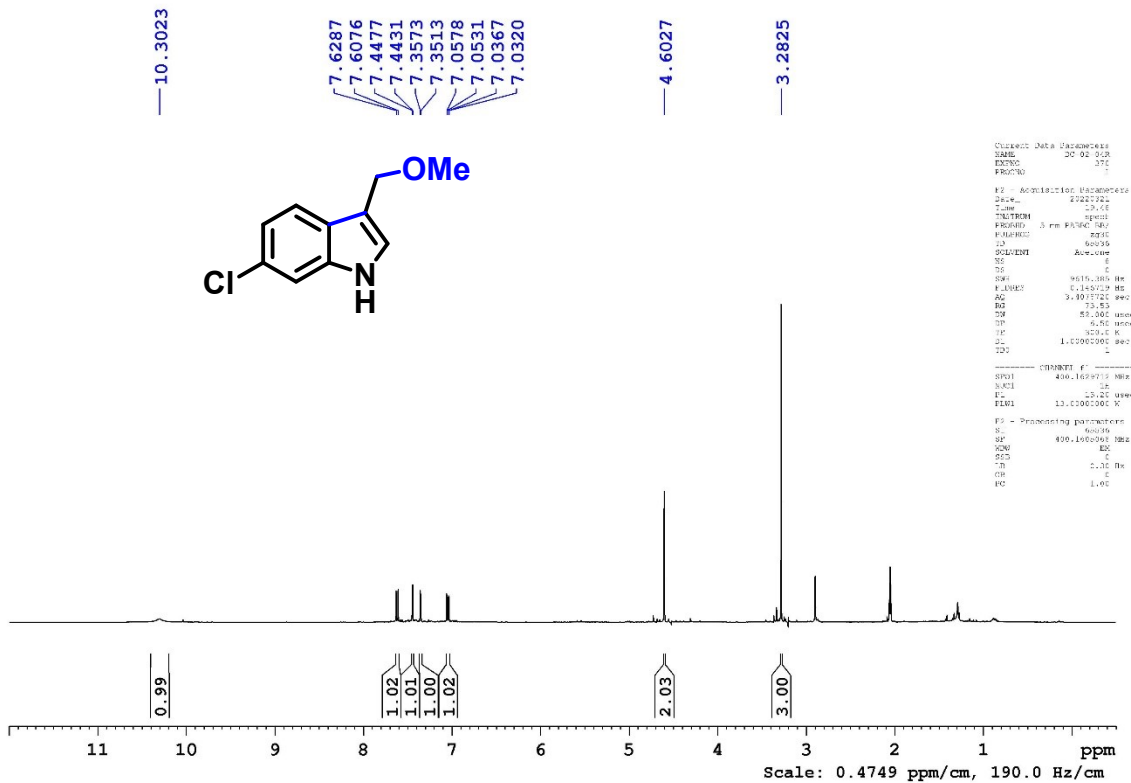

Figure S-136: <sup>1</sup>H NMR (400 MHz, D<sub>6</sub>-acetone) spectrum of compound 4h

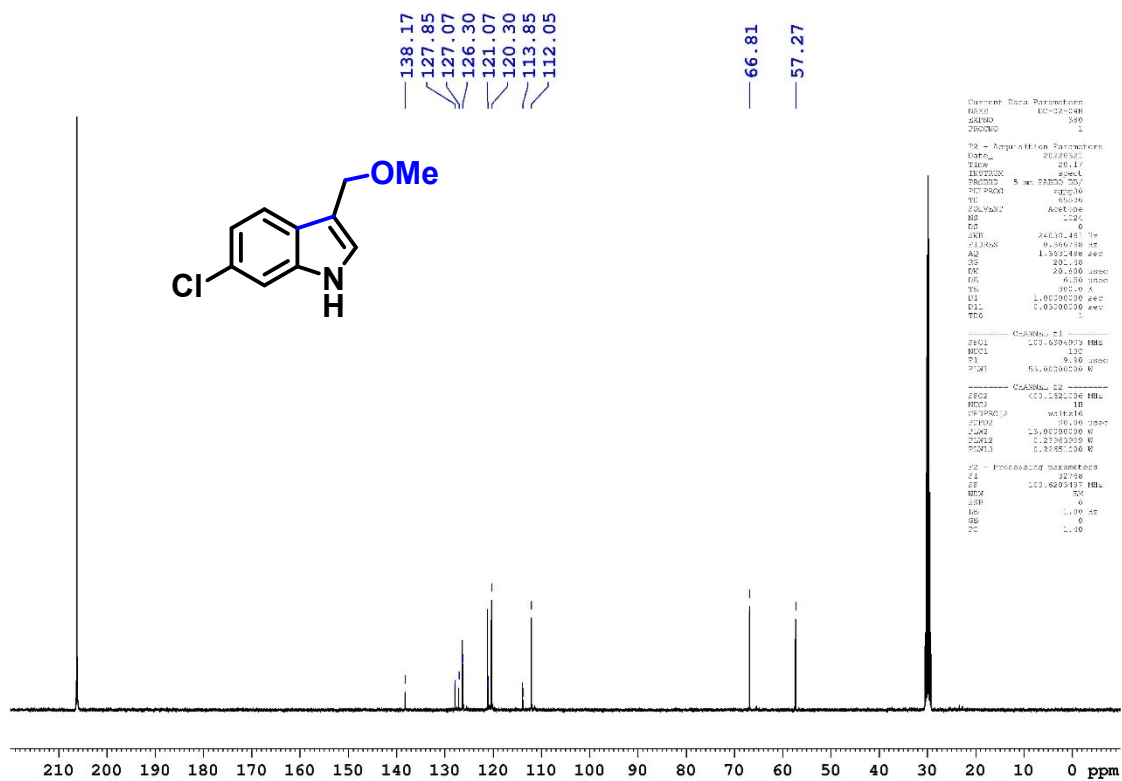

Figure S-137: <sup>13</sup>C NMR (100 MHz, D<sub>6</sub>-acetone) spectrum of compound 4h

|               |                  |             |             |                 |              |                        |                       |
|---------------|------------------|-------------|-------------|-----------------|--------------|------------------------|-----------------------|
| Sample Name   | SD-01-772-3      | Position    | Vial 26     | Instrument Name | Instrument 1 | User Name              |                       |
| Inj Vol       | 1                | InjPosition |             | SampleType      | Sample       | IRM Calibration Status | Some Ions Missed      |
| Data Filename | HRMS22124MAR26.d | ACQ Method  | ISOCRATIC.m | Comment         |              | Acquired Time          | 3/24/2022 12:41:47 PM |

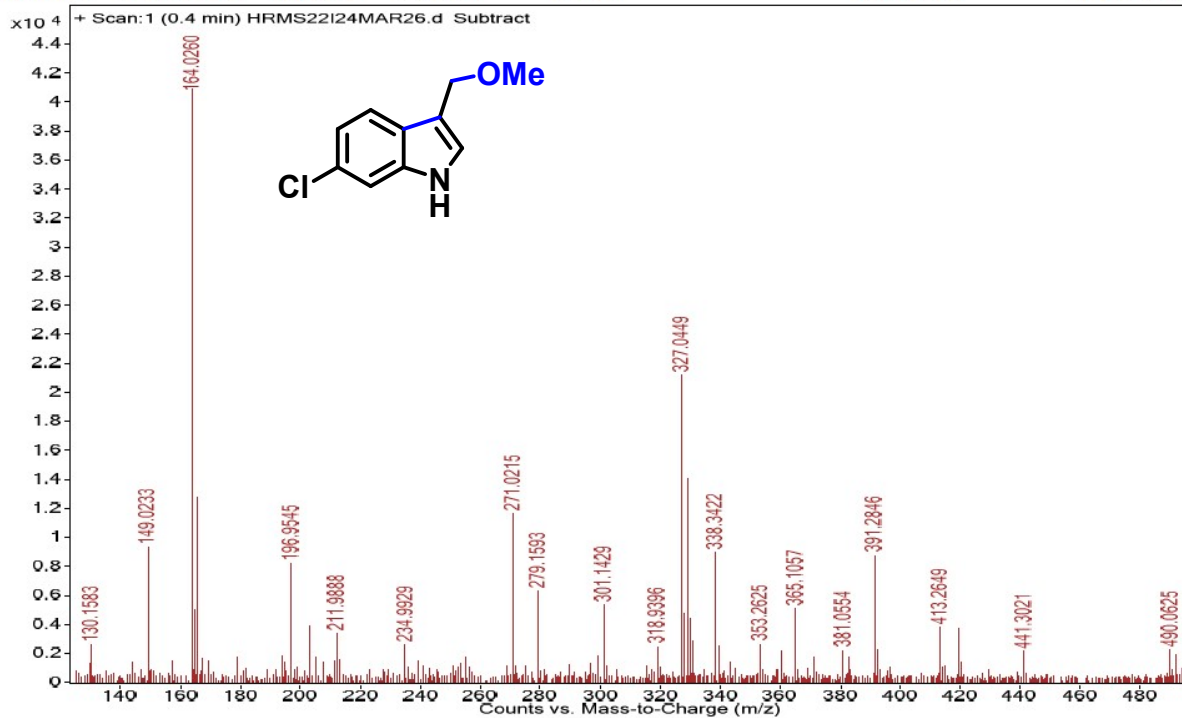

Figure S-138: HRMS spectrum of compound 4h

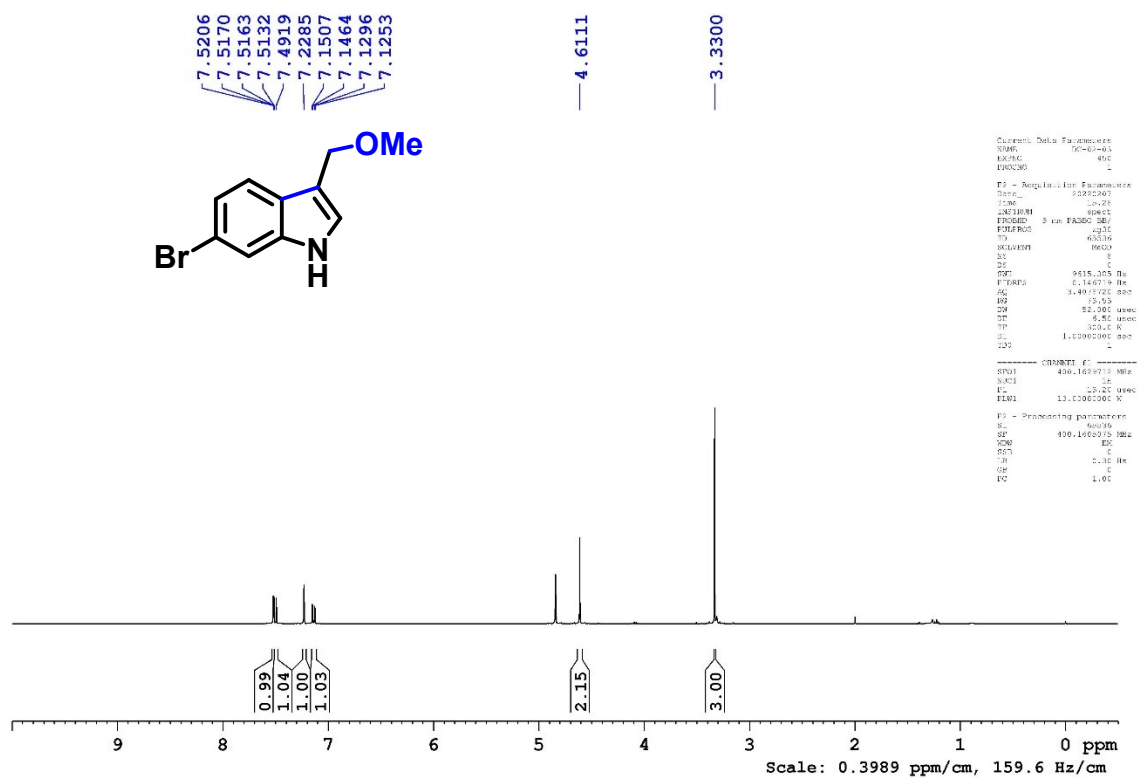

Figure S-139: <sup>1</sup>H NMR (400 MHz, D<sub>4</sub>-methanol) spectrum of compound 4i

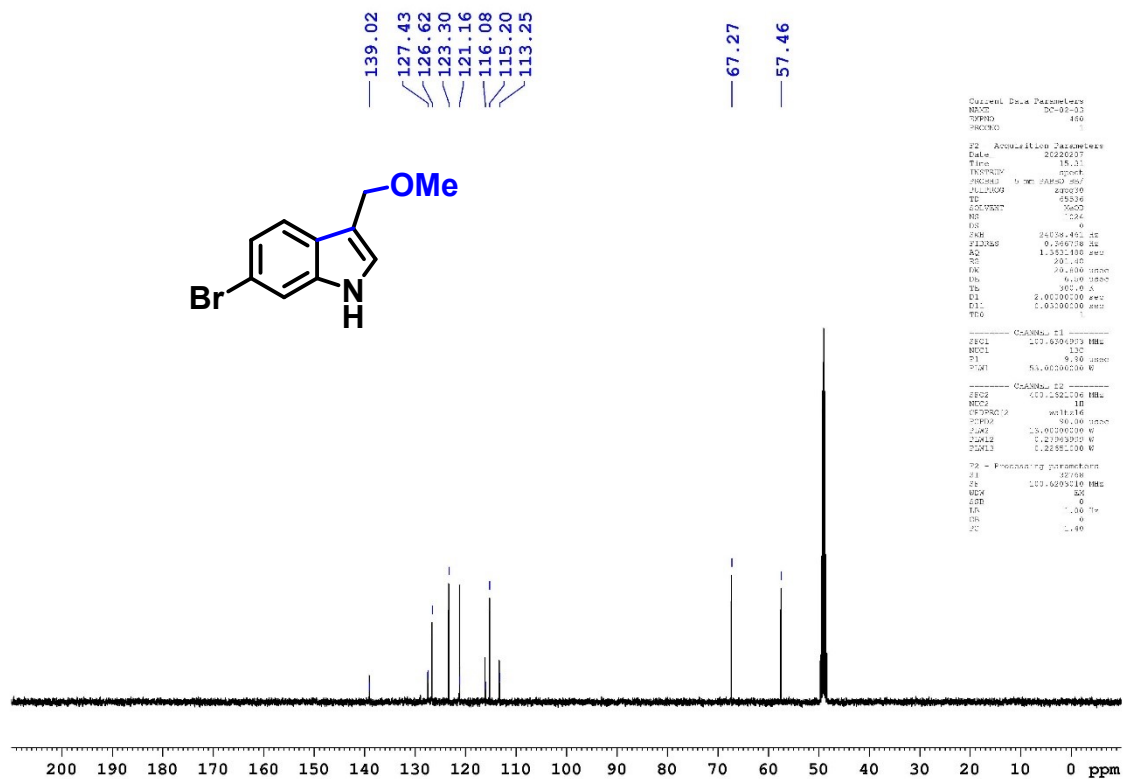

Figure S-140: <sup>13</sup>C NMR (100 MHz, D<sub>4</sub>-methanol) spectrum of compound 4i

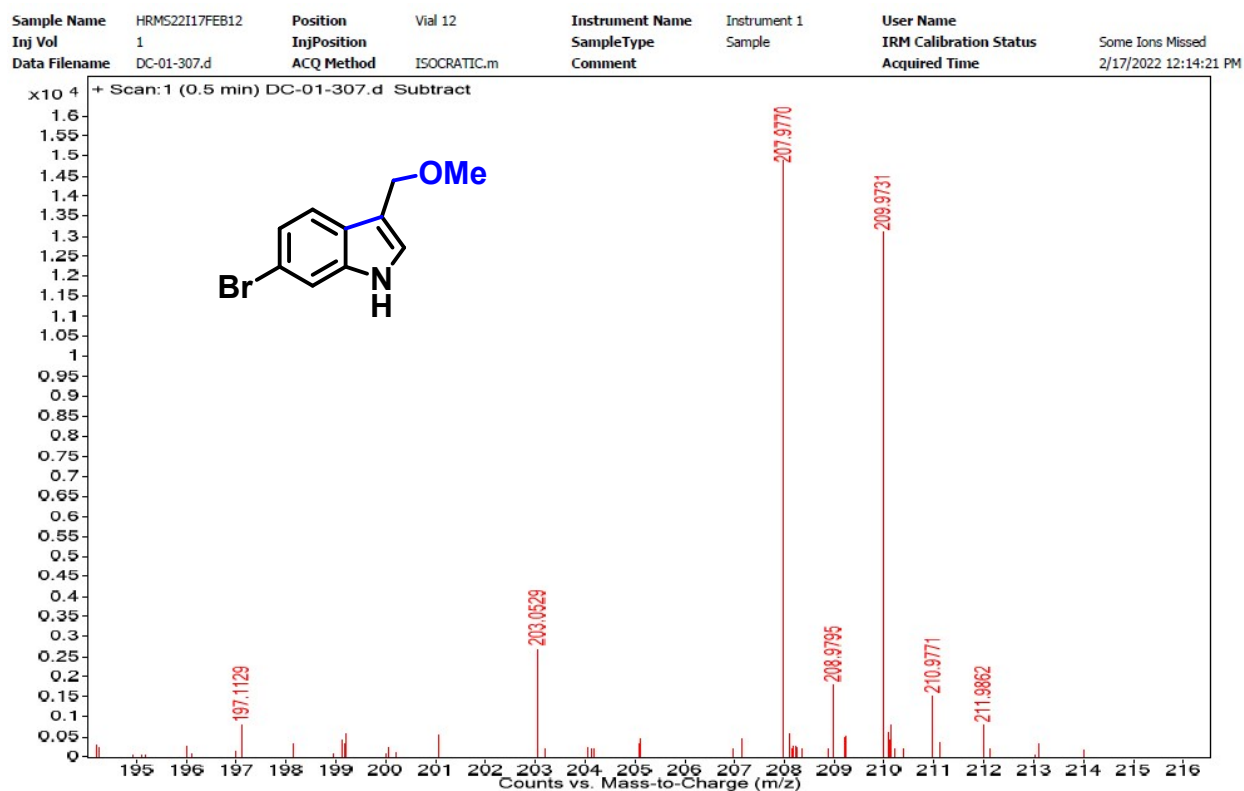

Figure S-141: HRMS spectrum of compound 4i

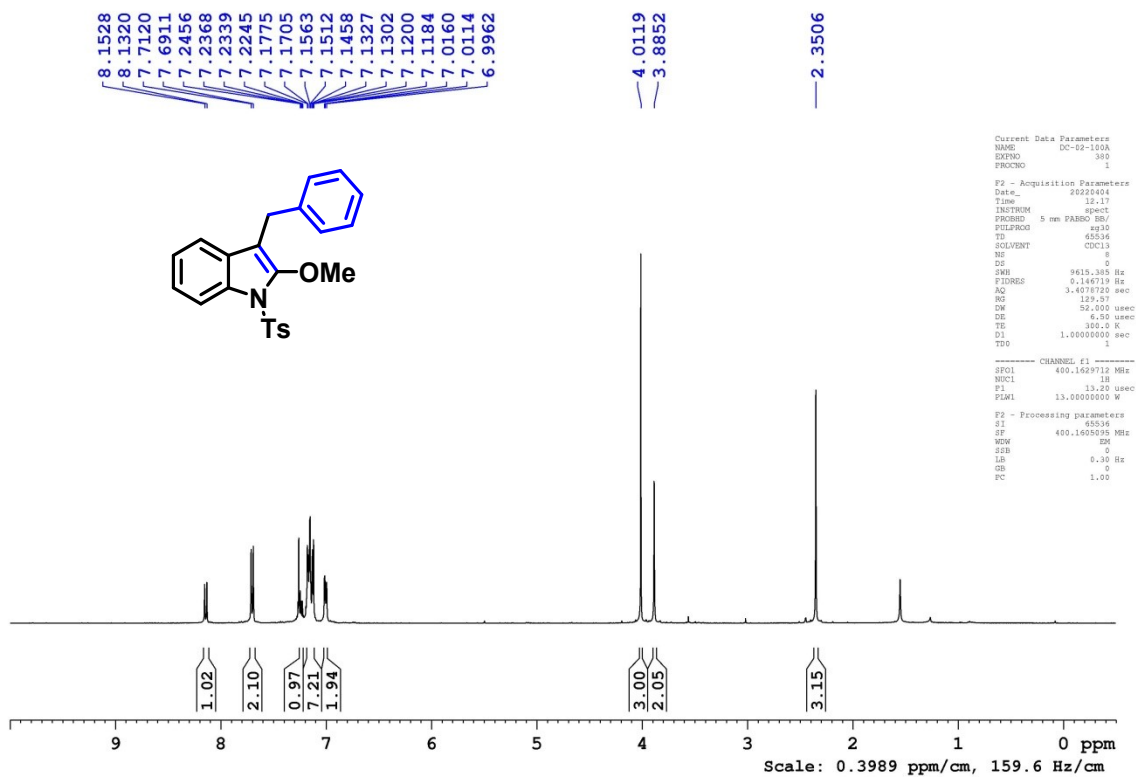

Figure S-142: <sup>1</sup>H NMR (400 MHz, CDCl<sub>3</sub>) spectrum of compound 5

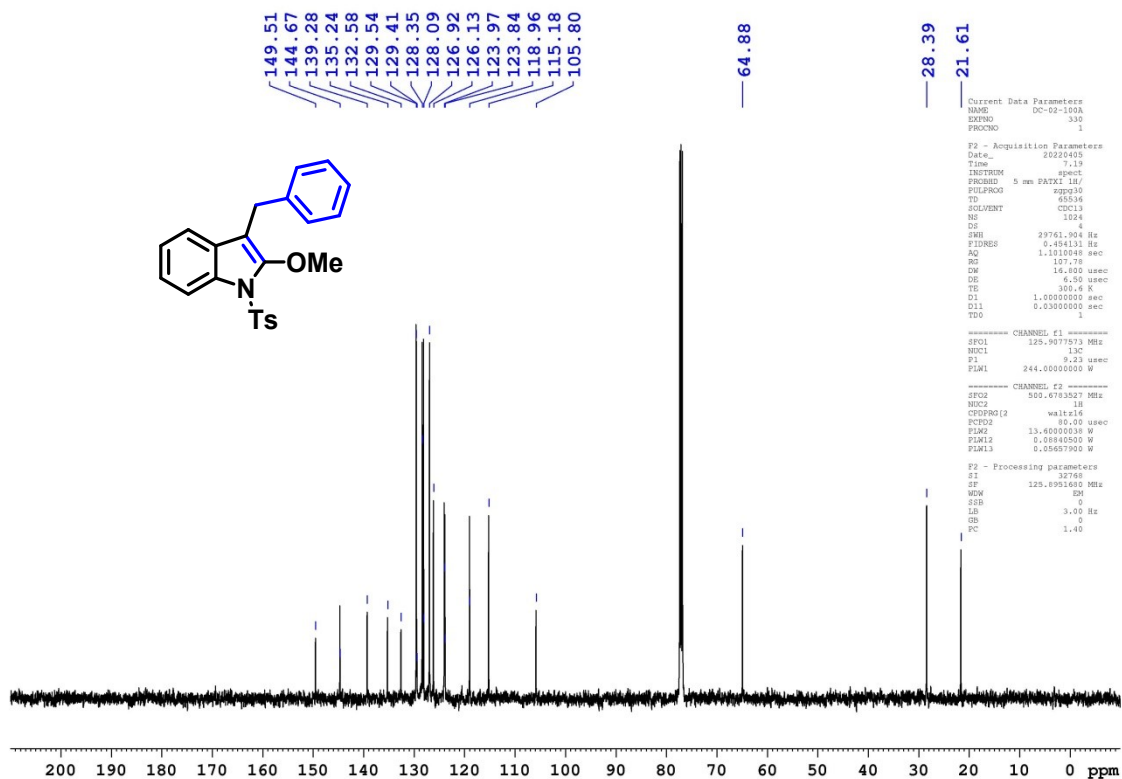

Figure S-143: <sup>13</sup>C NMR (125 MHz, CDCl<sub>3</sub>) spectrum of compound 5

|               |                  |             |             |                 |              |                        |                     |
|---------------|------------------|-------------|-------------|-----------------|--------------|------------------------|---------------------|
| Sample Name   | KM-PHU           | Position    | Vial 26     | Instrument Name | Instrument 1 | User Name              |                     |
| Inj Vol       | 1                | InjPosition |             | SampleType      | Sample       | IRM Calibration Status | Some Ions Missed    |
| Data Filename | HRMS22105APR26.d | ACQ Method  | ISOCRATIC.m | Comment         |              | Acquired Time          | 4/5/2022 4:48:16 PM |

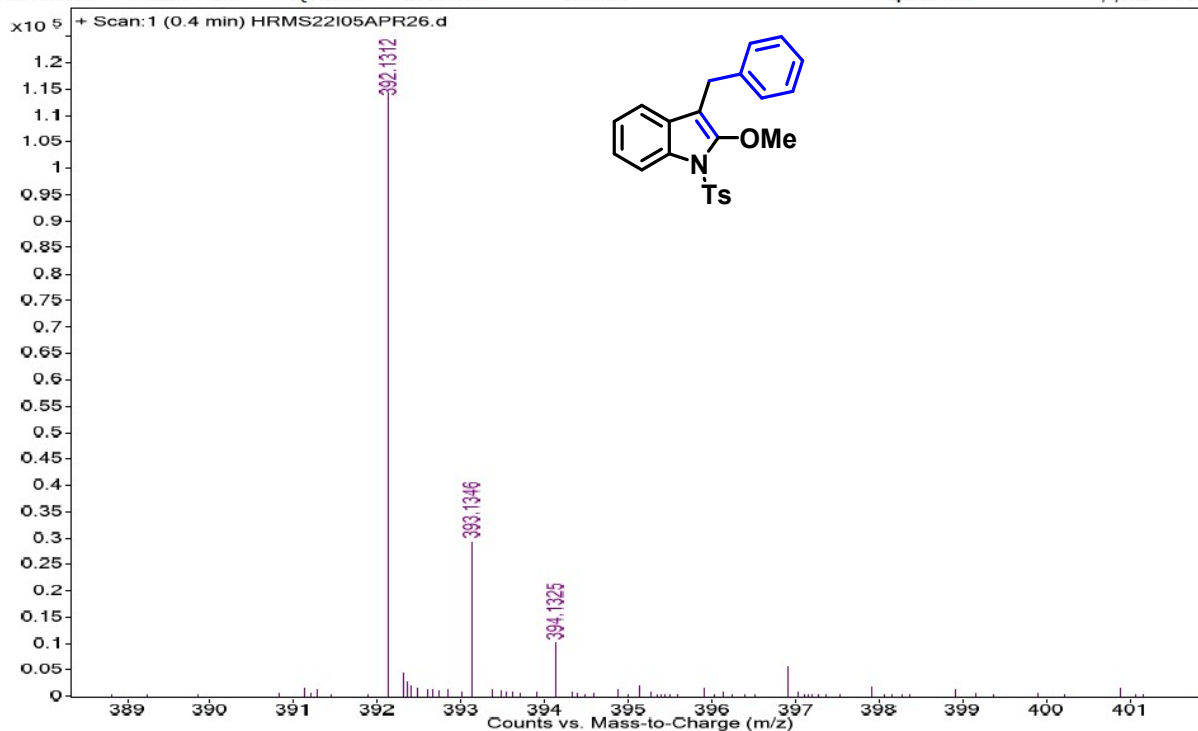

Figure S-144: HRMS spectrum of compound 5

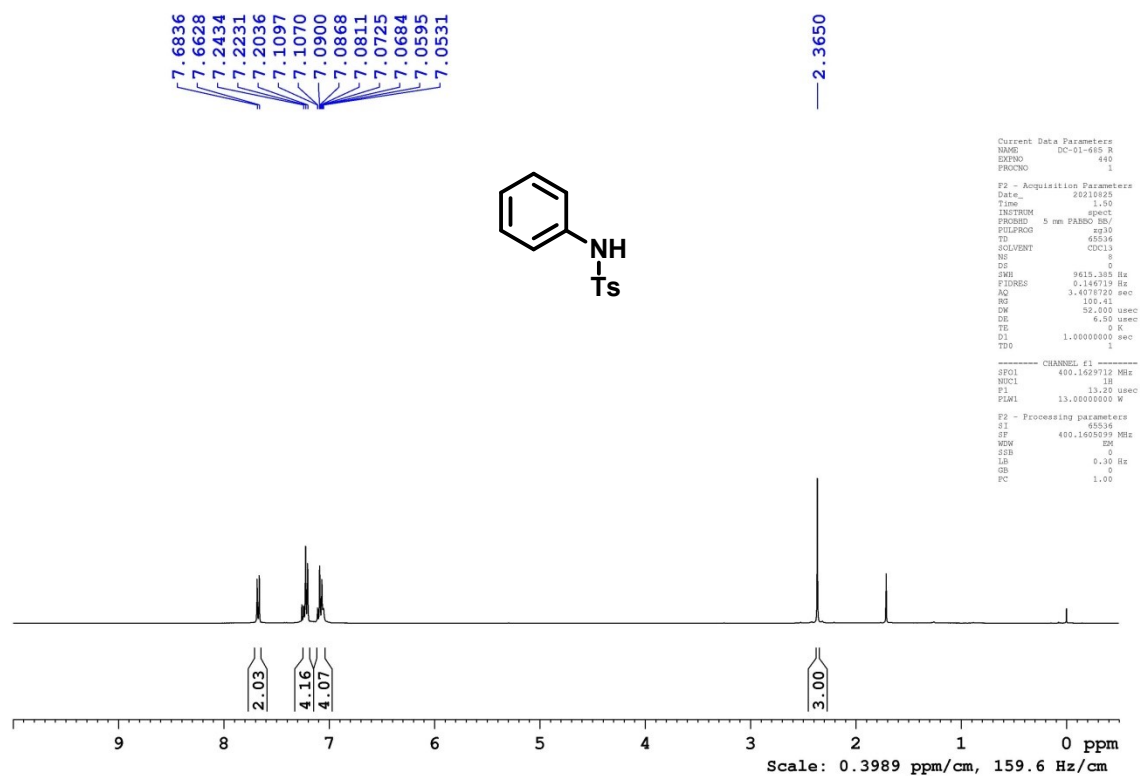

Figure S-145: <sup>1</sup>H NMR (400 MHz, CDCl<sub>3</sub>) spectrum of compound 7a

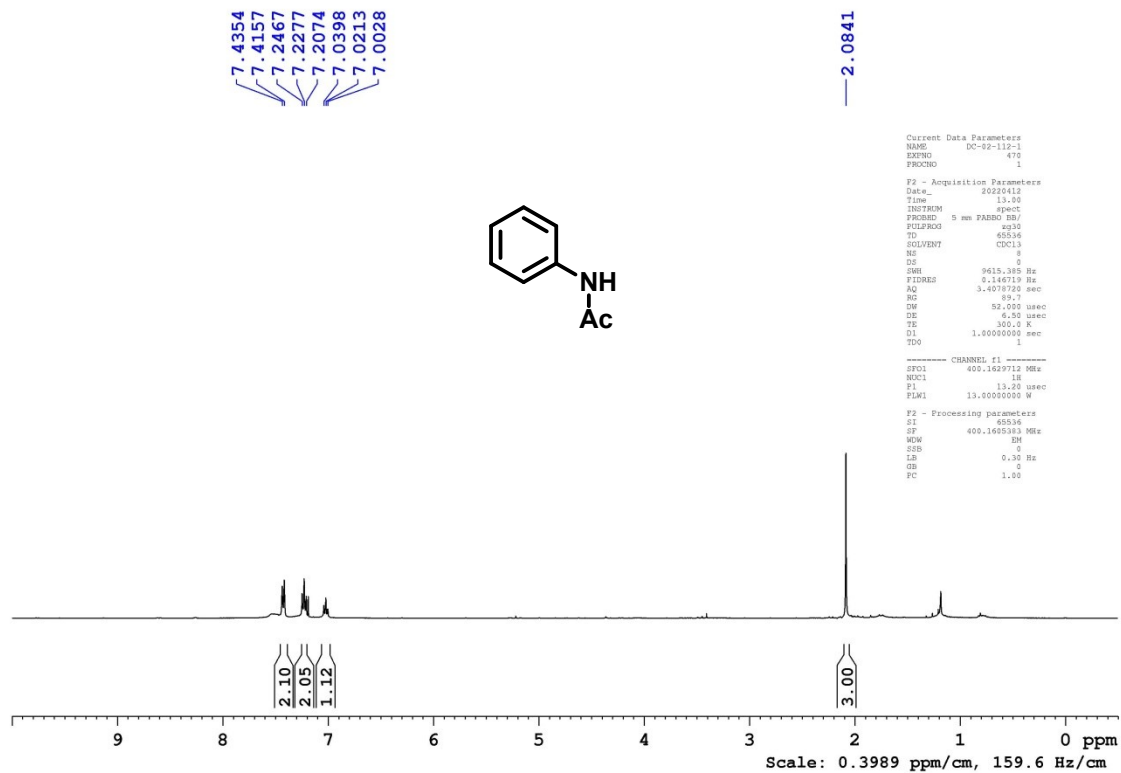

Figure S-146: <sup>1</sup>H NMR (400 MHz, CDCl<sub>3</sub>) spectrum of compound **7b**

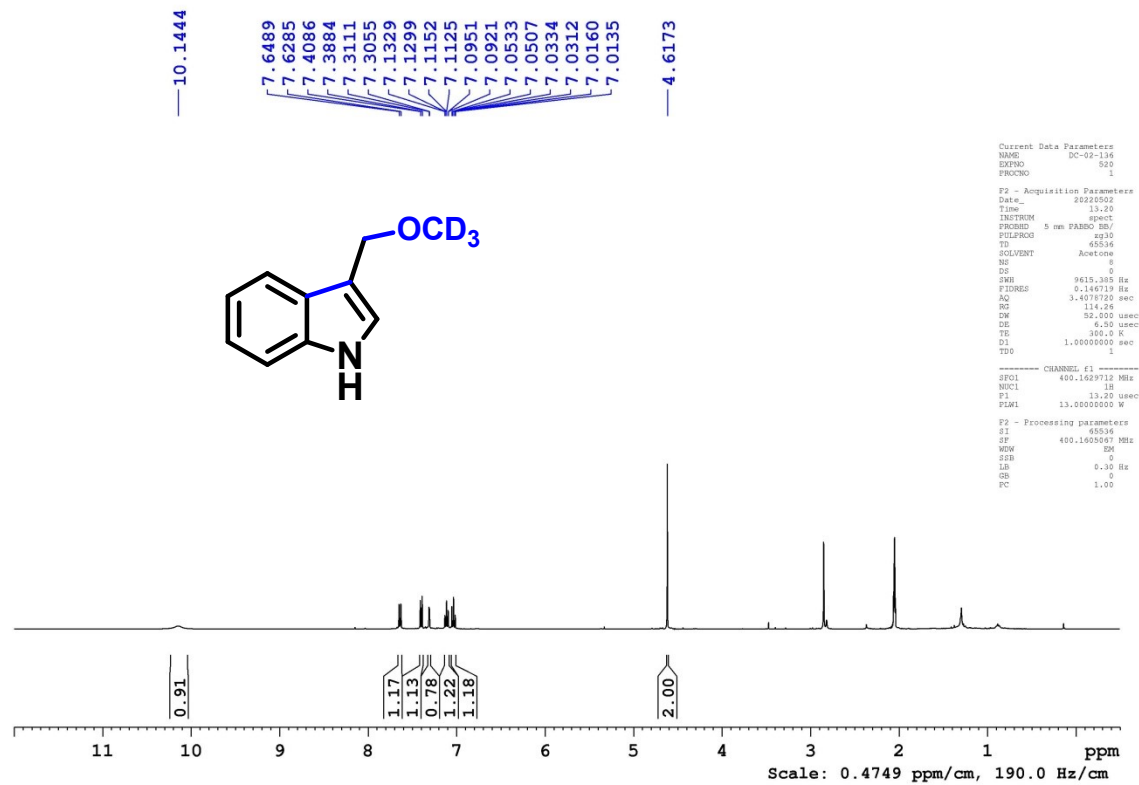

Figure S-147: <sup>1</sup>H NMR (400 MHz, D<sub>6</sub>-acetone) spectrum of compound **4a-D**
